# Supplementary material for: Short-Term Caloric Restriction and Subsequent Re-Feeding Compromise Liver Health and Associated Lipid Mediator Signaling in Aged Mice
Source: Nutrients. 2023 Aug 21;15(16):3660. doi: 10.3390/nu15163660 (PMC10458887; doi:10.3390/nu15163660)
Supplement: Supplementary file 1 [file nutrients-15-03660-s001.zip]

Archive with 4 entries (4 files):
- nutrients-2521443_revised_supplement_clean.pdf
- Table_S1_CR_liver_proteome_data.xlsx
- Table_S2_CR_liver_LM_raw_data_supp.xlsx
- Table_S3_CR_liver_p_values.xlsx
