# Supplementary material for: Short-Term Caloric Restriction and Subsequent Re-Feeding Compromise Liver Health and Associated Lipid Mediator Signaling in Aged Mice
Source: Nutrients. 2023 Aug 21;15(16):3660. doi: 10.3390/nu15163660 (PMC10458887; doi:10.3390/nu15163660)
Supplement: Supplementary file 1 [file nutrients-15-03660-s001.zip › Table_S1_CR_liver_proteome_data.xlsx]

## Sheet: legend
experimental groups
	young	liver homogenates from C57BL/6JRj at an age between 2 and 3 months with ad libitum access to food
	old	liver homogenates from C57BL/6JRj at an age between 18 and 20 months with ad libitum access to food
	CR	liver homogenates from C57BL/6JRj at an age between 18 and 20 months with 30% calorie restriction over four weeks
	CR+RF	liver homogenates from C57BL/6JRj at an age between 18 and 20 months with 30% calorie restriction over four weeks and subsequent 2-3 days of ad libitum re-feeding
additional information
	NA = not detected

## Sheet: raw data
	young_1	young_2	young_3	young_4	young_5	young_6	old_1	old_3	old_5	old_6	CR_1	CR_2	CR_3	CR_4	CR_5	CR_6	CR+RF_1	CR+RF_2	CR+RF_3	CR+RF_4	CR+RF_5	CR+RF_6
A0JNU3	66571.6	68990.5	108866	113525	75032.3	77438.9	55065.5	85048.8	54642.4	69354	35694.3	59910.9	40650.3	68609.3	76046.7	37695.2	77822.8	65574.7	61769.6	66162	53130.8	69823.2
A2A432	4040.69	7580.5	14423	11341.6	12022.7	8694.44	8290.22	9998.56	20762.2	12092.5	9422.57	10022.6	9518.38	16489.2	15165.4	11888.5	10285	8981.77	10778.1	9327.81	6436.12	9155.81
A2A5R2	15283.9	15565.3	11156.8	15539.2	14237.9	11267.8	16144.3	12235.8	19579.5	14031.2	14396.1	10989.6	15013.8	20290.3	13701.8	16295.2	11732.8	13800.9	11701.1	19335.9	22450.4	21488.7
A2A7S8	22346.1	8787.49	17762.9	22534.4	18247.3	17691.2	11919.4	18457	14720.8	22162	23390.3	15581	21317.6	20578	18580.5	21420.2	13436.8	8280.16	44435.1	38963.8	66144.8	7889.09
A2A8L5	27144.9	16101.4	25378.6	24297.5	20660.7	20104.4	33047.6	22419.7	26411.3	8152.2	4338.07	55084.7	3923.87	17078	15440.1	39589.3	26059.6	36501.5	4566.46	15906.4	7314.05	20850.5
A2A8Z1	19644.4	19571.4	13274.7	16328.3	16344.9	14648.7	18873	12519.9	18433.2	19209.2	14807.7	15643.2	16990.9	10855.9	11826.9	12079.5	13497.4	16410.6	15654.4	20492.7	22172.1	14879
A2A935	2742634	1.89266e+06	2413969	2.07579e+06	2.28003e+06	2.17522e+06	1.48123e+06	2153901	1.81212e+06	2.14679e+06	1978306	2.1259e+06	1.51045e+06	2.2696e+06	1.51863e+06	2.26023e+06	2.61146e+06	1.96678e+06	1.98754e+06	2405729	2.23591e+06	2.2216e+06
A2A9C3	1.4961e+06	1.28026e+06	1066743	1.16453e+06	1.10229e+06	1.28483e+06	1.30234e+06	1.19724e+06	1.28068e+06	1.47129e+06	997496	983017	1.16136e+06	686458	670596	705680	981872	920834	1.3137e+06	1.85395e+06	2.55538e+06	946328
A2ADA5	140035	476159	408122	435482	503030	175352	312105	132691	215502	95928.1	166260	302274	630114	179437	296211	148870	174538	249707	45124.3	185998	71856.8	151275
A2ADY9	210839	212524	247418	221010	254755	247753	175275	187362	224257	156451	152848	122578	120244	186317	215970	161139	230336	215226	80324.2	136322	131652	244731
A2AGT5	24396	21784.3	22373.8	23818.7	23474.1	23239	24191.4	19930.1	24566.1	23672.4	19942.2	19678.6	12662.1	26663.1	18386.4	17465.4	23229.5	21570.8	23523.4	25493.7	29219.4	24613.5
A2AIL4	37277.2	32942.7	28790.9	27970.7	24163.4	26521	23469.6	28674.3	28888.8	20645.2	36914.5	25314	20679.7	34832.6	33033.7	48623.1	30143	24535.2	25283.6	30933.3	39098.2	28522.3
A2AJI0	50580.4	21573.7	32944.4	21018.4	26851.7	35896.4	38424.5	29336.5	76755.1	18931.6	30896.3	33798.6	48267.4	31856.3	28174.6	24468	29947.6	17981.4	43982	31208.9	53067.8	38844.3
A2AJL3	32336.1	55537.6	83638.6	79522	94293.5	67238.5	49511	72610.9	72965.1	58902.5	45715.1	71984.9	60110.4	59314.1	64583.2	25933	79267.5	68539.4	23245.8	55590.7	57136.3	77804.8
A2AKK5	93069.2	75957.6	136376	92497.7	105358	117697	59880.5	97153.8	119390	85629.6	44991.3	60113.8	53278.1	68273.7	70694.1	54432.5	142540	121848	41584.7	64817.9	100676	97680.2
A2ALU4	10266.7	14962.1	11528.4	11930.6	10105.9	6979.45	14310.5	8985.96	12876.2	8564.97	18127.9	8713.21	7516.5	11754.9	16491.6	10211.1	8729.36	9601.92	7468.05	11492.5	11510.7	6644.31
A2ALW5	3526.48	11294.9	10672	18534.8	24405.9	9415.38	7097.81	13739.9	34833.1	10588.3	1280.92	10955.9	10285.1	16847.6	14363.3	23035.3	9781.34	16378.2	NA	10155	6586.14	9657.23
A2AN08	15019.6	21005.8	26900.1	28828.9	25589.7	17366.5	18733.9	22190	29617.7	20402	17958.3	19824.9	12962.9	26099.9	29769.2	22876.2	28759.2	30284.2	16344.4	26023.1	18187.6	30675.2
A2APT9	25436	13111.9	3789.2	15918.3	3120.27	8726.31	NA	10713.5	NA	15593	6022.29	9528.49	9561.69	2715.12	12854.7	NA	30076.9	23369.9	16581.5	12873.8	32408.9	25102.4
A2APV2;Q6ZPF4	67337.9	76792.4	64640.4	89917.9	57783	51517.2	97808.2	66571.8	73155.9	63981.1	104359	77423.4	43875.9	82718	70031.6	82423.8	62960.1	71369.8	55219.5	60397.6	55928.8	85857.6
A2APY7	14222	25517	15254.7	21970.7	15697.4	15851.8	16247.6	22622.9	13793.9	15869.4	17316	18101.2	NA	33774.4	24913.6	14078.6	13555.6	15261.5	28275.3	27372.5	33534.5	13071.5
A2AQ19	73101.9	61738.1	63486.6	22453.8	40769.2	57596.7	37070.9	79118.5	NA	61835.6	47030.1	77932.2	NA	35036.3	NA	NA	30507.3	30926.1	63675.8	96776.4	70260.4	39949.8
A2AQ25	9940.46	8131.94	6604.64	3061.39	3852.1	4643.35	7742.13	9370.97	14788.8	5568.09	15021.9	5843.07	2123.73	8092.39	9191.55	6164.94	3377.99	4466.36	8450.79	7726.47	11735.7	5750.92
A2AR02	89493.5	46686.2	86788.2	76048.2	89584.5	70873.8	51131	64252.7	NA	51463.2	32308.5	53970.7	NA	NA	71315.1	80664.9	68688.5	70883.9	NA	59208.4	33013.7	72898.7
A2ARA8	29165.9	23155.3	31834.7	17748.7	19500.3	26432.4	17121.9	26373.5	35528.5	64347.9	29411.6	44281	34337.3	20990.4	NA	21234.5	24026.9	11977.8	16440.1	21784.6	28046.3	16832.8
A2AS89	63235	50515.7	27752.3	38892	26704.1	65805.6	60509.2	56759.5	174470	88850.1	62709.1	81906.5	143905	70229.5	64796.8	59707.5	83615.8	55603.2	79832.7	77288.6	135589	44268.2
A2ASQ1	1768.48	5891.65	4920.08	4854.85	5805.92	3811.14	6930.54	3728.06	39232	8247.35	2870.21	9638.76	4951.53	4891.82	2471.74	5297.4	2921.85	3472.73	9452.68	3714.7	6017.88	3895.71
A2ASZ8	17667.9	34080.2	51323.9	47182.9	56712.8	31499.8	28148.2	30866.6	40967.3	21049.9	42119.3	13225.1	22841.4	96185.3	49424.5	50738.9	31620.2	38541.3	122440	14666.5	23971	37681.2
A2ATU0	28525.3	37042.3	54077.5	43600.5	44535.4	37077.8	37544.5	37713.8	43498.1	31239.5	43094.1	39916.5	37589.8	107667	69308.7	79573.8	41971.6	46070.9	34839.7	34308.9	34610.7	52090
A2AWA9	27852.7	22616.5	19718.5	20677.2	20476.6	22794.2	28980.8	23813.4	18145.6	19550.9	22024.6	23330.9	13573.7	14067.7	17400.9	16617	16266.6	19069.9	31023.2	30554.9	32953.5	18485.5
A2AWP8	13428.2	12319.3	8479.72	NA	7983.19	9696.4	10180.5	8692.03	NA	10261	8703.19	4967.36	7017.86	NA	NA	6252.8	4337.99	6190.92	23320.6	13982.2	18660.1	6442.14
A2BDX3	32182.7	31705.5	31367.2	36254.2	34962	26482.8	15819.9	31696.8	30030.8	23471.2	38601.3	30724.3	25903.2	30910.9	24307.4	39492.1	19679	29505	26398.8	19612.9	18204.7	38393.1
A2BH40	6476.24	4728.82	3900.25	6137.35	2439.97	2997.53	6447.57	3651.55	8560.55	9181.08	7083.22	3111.49	NA	2050.45	8448.7	8138.15	3307.1	4367.18	6900.27	9691.84	9889.07	6679.89
A2RSJ4	18263	8585.63	10931.3	10104.8	18970.4	8579.43	12661	19166.8	20678.7	18319.3	25592.1	18115	19435.2	22407.1	20595.7	20313.3	17532.9	20377.2	28463.7	28058.3	44328.5	19547.3
A2RSQ0	19616.3	35049.3	21654.9	26358.9	20084.8	23997.1	25159.1	19599.7	25152.3	24591.5	24167.3	33983.5	25037.5	44588.7	36091.4	25189.6	46437.9	35939.2	24751.5	29300	19368.6	21833.8
A2RSY6	13166.4	12311.1	NA	7218.68	9816.4	15702.3	13186.3	7437.08	8396.64	14709	NA	7191.97	NA	6341.54	9229.51	8329.2	8048.84	9262.58	14408.1	21522.1	21669.7	8107.89
A2RTL5	22993.3	10498.9	12947.8	11246.2	7593.37	3855.4	10502.4	13316.3	19187.1	7297.56	7571.9	10743.8	6613.47	8868.09	12134.6	9763.27	8143.51	10274.2	21046.9	15897.1	13664.4	4341.02
A3KGB4	12287.6	17894.6	22379.5	26416.8	25420.8	12096.1	19538.5	12997.7	18481.7	16837.4	18796.6	14870.9	15294.3	16491.9	19781.1	18861.7	21847.8	23758.9	26027.3	37341.3	20767.3	20562.4
A3KMP2	84899.2	161126	136927	102840	132472	109991	143326	166591	114564	139494	101392	144930	108430	132064	180992	148470	192869	155475	94007.8	116725	101668	140059
A4FUP9	12243.7	38277.1	20374.4	28815.1	18563.1	17715.4	40227.7	44206.2	40369.5	55259.9	66679	67868.7	72050	25837.4	33877.3	49507.8	36598.4	52473.6	55991	54295.8	52360.7	17189.7
A6H5X4	4027.42	NA	6257.01	9234.97	5579.58	451.612	3628.31	NA	5468.49	NA	3402.4	NA	NA	3974.25	5737.68	8263.16	1844.62	4677.54	3956.56	2612.81	9201.29	4518.72
A6H5Z3	40742.5	28197.6	32630.5	22483.6	25090.8	49500.9	28587.7	50852.9	41383.2	27825.9	40352	43243.2	23209	33076.5	96350	25540.4	37653.7	55959.6	27827.1	41419.4	43707.5	55511
A6H611	34511.5	35983.4	35208.9	36443.4	40051.3	40617.8	36634	48026.1	48064.9	44812.6	32936.4	29731.1	38872.1	46131.1	35838.2	61906	51874.6	45262.2	38129.7	63453	49839	48334.2
A6H630	26708.6	26396.6	30850.1	29008.5	31624.8	28113.8	21080.3	30245.1	31821	35444	22292.2	27362.8	24521	31092.8	26171	30203	28021.6	26715.8	25778.2	22266.3	20232.5	28078.6
A6H6A9	29258.6	31624.1	23048.7	13063.1	9685.92	37666	16185.8	17655.8	37378.8	13375.7	10391.3	18172.4	8088.89	23811.4	17432.3	11560	14861.1	13396.3	11127.2	6344.15	29458.4	18886.7
A6H8H2	22025.6	24424.4	21441	25418.8	25234.6	23041.2	22030.4	16935	19340.1	21541.1	24647.6	22733.3	31385.3	24273.1	23214.3	25805.6	23490.8	23279.2	37555.2	35957.1	45856.1	21758.6
A6X8Z5	3360.38	3925.09	3405.62	3527.09	3080.05	6610.76	4503.12	3174.14	NA	5973.8	6537.61	3674.37	3020.85	3930.76	4385.49	6944.06	2929.28	3254.66	2813.13	5143.35	4697.01	8785.59
A6X935	64964.9	53610.3	54367.2	76372.6	40087.2	52058.3	96987.6	98111.5	69803.6	79585.7	58775.7	62922.8	105807	67055.3	82408.5	60890.8	69042.4	61053.3	154788	92823.9	100429	117057
A7MCT6	52470.1	41373.7	53809.1	81013.6	78789.1	51691.4	20868.1	33687.7	34643.6	40543.4	38978.9	35249.5	41450.4	82464	75088.9	73565.7	66199.4	32707.5	29887.8	51269.8	25004.2	38909
B1AR13	50096.3	49769.3	42007.5	44097	42358.8	53690.6	41463.5	40484.1	38127.6	48491.9	34213.7	42858.5	119748	40899.2	193085	20621.5	60930.6	52328	49984.3	59005.7	71313.3	43716.6
B1AVZ0	25855.6	28780	25667	30787.5	16969.3	28286.5	36900.1	47540.2	35906.5	33419.5	32262.3	29445.2	27541	36707.7	28351.7	45134.9	16062.1	20514.1	30537.1	49064.9	67109.3	24241.8
B1AXP6	29642.8	30731.8	21409.3	10021.5	33102.4	69955.3	24615.4	48200.1	44914.1	29616.4	20857.5	26961.4	19138.4	NA	6828.35	5950.13	27047.6	8514.51	48040.7	30704	53195.9	23545.6
B1AY13	15295.3	19248.5	26320.1	29399.3	17777.2	15581.5	15002.8	22601	26702.9	24752.3	13493.2	20944.4	15645.5	16714.5	14874.8	17473.2	23722	23136.7	14856.4	24185.2	26712	20219.1
B1AZP2	17086	14717.9	13659	10272.7	10604.1	7929.12	11876.8	11358	14911.4	15694.3	19317.8	41617.2	18454.4	21546.2	24831.1	10011.3	34712.8	13163.3	25163.7	31336.9	35549.3	11028.1
B2RQC6	13029	21304	39495.9	37071.3	35911.3	30172.9	21208.6	16584.7	31245.7	15318.2	21346.2	24870.2	7696.06	37591.8	24236.3	24657.6	29925	32566.4	13131.9	23968.2	14564.7	37728
B2RRE7	29600.1	32657.9	28842.6	20614.9	18354.1	14710.1	17996.6	13792.7	14416.4	24194	23198	10271.2	11067.4	20463.9	10057.7	28583.6	13735.6	17787.7	32927	20686.6	40637	7828.21
B2RX12	18285.4	24592.1	42405.9	32491.7	29145.6	25224.6	23822.6	20693.3	42851.7	18144	31387.4	36032	34896.2	60777.5	50687.1	14572.7	31409.3	36053.4	14751.8	23735.4	23508.8	24967.5
B2RXS4	28446.1	32677.6	26400.3	29871.1	27880.7	33076.3	33141	47071.3	46374.6	41941.3	30098.5	39293.3	31367.2	28503.1	36084.8	34278.6	35383.7	26229.1	34954	35904.6	44429.3	38651.3
B2RY56	50461.8	24080	19236.6	26130.3	23175.3	20643.3	30284.1	20289.2	65151.5	31313.1	30356.9	26251	20047.2	21123.2	25084.8	32152.1	16630.8	18677.8	40817.9	29129.7	38112.6	33761.5
B5X0G2	6231.88	7557.8	12616.6	6308.94	21125.3	13620	8014	12879.3	5098.62	2509.28	NA	NA	3779.17	656.414	NA	NA	4065.91	NA	3057.45	NA	NA	NA
B7ZMP1	36204.3	30385.6	47752.5	50478.4	53012	40158.3	26755	37132.4	59509.8	29991.1	36777.1	34398.7	23180.7	50497.6	48242.9	46263	34285.7	37706	21045.8	23904.1	28221.9	40848
B8JK39	20095.5	4940.86	2935.22	6554	1972.84	5309.49	8006.03	7359.33	10016.3	4590.91	4483.26	4338.26	6115.55	8366.56	7159.49	7016.52	5838.74	5154.16	7649.38	5659.33	8093.67	5676.95
B9EJ86	19010.1	21191.1	25763.2	29339.7	25338.1	19251.3	16081.4	14404.4	24591.1	15082.6	15158.3	16665.1	19126.6	21107.9	12224.8	24038.6	21038.5	23566.2	12611.2	18328.4	15873.4	19443.5
B9EKI3	23142.7	16159.9	15412.7	12770.8	13306.4	23268.9	16382.6	28621.8	27211.6	22251	18823.6	14423.7	15042.8	14243.4	19684.1	16982	26508.1	10579.3	25049.9	41823.2	45563.9	15852.2
D0QMC3	18675.3	20722.6	12262.2	21996.4	9338.03	11319.7	23318.2	12202.6	43015.3	24536.6	20186.6	13665.1	17360.8	30278.7	27516	21041.8	15332.1	19487.1	7354.25	19880.9	26968.7	13760.4
D3YXK2	83752.4	53250.5	49824.1	37451.4	74528.3	57425.5	79812.5	46540.2	57017.2	55561.7	54542.2	45635.4	81460.1	101050	36758.3	80275.9	34385.3	35028.6	61221.7	66154.3	99216	62544
D3YZF7	191173	290509	163926	162609	145321	235850	278507	159452	168634	83526	193906	147376	275888	75802.8	114727	172819	124655	168805	294890	497478	472065	183341
D3YZP9	41362.9	40331.5	29278.1	34749.2	30113.1	36595.6	42516.8	34445	28631.8	41799.7	30146.9	26620.2	32009.7	20683.5	21047.9	24148.2	29337.5	26560.5	57291.4	53760.4	80075.1	36732.6
D3Z4S3	43134.5	23604.5	15830.8	27191.4	23047.5	28712	22094.1	17820.4	28460.7	27444.4	24858.8	32372.2	55897.1	19136.2	28835.5	37725	16586.8	23253.3	51137.9	34649.9	49973.7	12030.6
D3Z6Q9	27017.3	14674.9	8263.1	19113.5	9183.73	20329.1	27242	29811.5	28143.2	29249.2	25197.7	19332.7	36532.3	15286.3	23311.7	24418.7	24271.8	20616.3	26018	30698.4	35651.6	16488.5
E1U8D0	520074	385592	347018	347515	296779	365715	472845	313948	34489.4	431256	421135	326384	323181	310388	263685	321921	278512	309777	388722	498014	674206	307526
E9PV24	312891	184391	197913	225750	222163	197312	297687	276471	222157	233077	323333	338360	510237	297858	404373	365191	242581	226803	583306	290619	352427	243273
E9PW74	25035	24576.9	24058.1	29616.4	26605.5	21276.2	11675.7	NA	NA	11226.4	17523.9	11418.2	19775.6	27805.8	18333.9	22501.5	19292.2	18859.4	20685.1	8438.7	8639.46	14303.6
E9PZJ8	47010.8	33695.2	14429.8	43215.7	20411	42668.1	56605.6	10154.5	22773.4	24499.3	48021.8	20563.3	36727.6	28065.3	25900.8	22128.5	22967	31267.5	NA	46739.7	42526.4	23748.7
E9PZQ0	168335	200791	290215	274916	288130	263460	164052	222475	236530	245006	174704	166784	186759	275526	214272	272556	316721	231672	156128	252248	169683	302271
E9Q1P8	5599.54	NA	NA	3301.55	1838.45	2717.02	2965.93	5991.57	8435.72	9136.22	11007.4	6574.84	6919.58	11379.9	NA	NA	5755.81	3002.06	6315.02	9954.99	11946.8	2203.85
E9Q3S4	6.54501e+06	5.64933e+06	4320310	4627937	5.55088e+06	5905708	4639418	5612522	130271	5.69818e+06	5371253	4105600	7.70228e+06	5417844	4.69138e+06	5.07838e+06	5474097	4648106	6.93396e+06	8916796	9491252	5.99247e+06
E9Q414	51166.8	38559.9	54935.6	58432.8	60822	51758.9	49600.3	57197.7	56688.7	61453.6	45688.3	56018.2	62183	71501.3	73078	50916.7	69927.7	71292.5	59753.8	76270.2	68329	64374.4
E9Q4Z2	30749.5	26601.7	55847.1	37970	40042.8	32784.5	28901.8	29447.3	41000.5	28030.2	19748.2	24947.2	23082.8	28204.9	27235.7	36158	70301.8	80455.8	42250	66649.4	36312.1	91295.9
E9Q555	19218.3	8967.88	15404.5	28369.8	14883.4	20352.7	11537.3	21747.4	18602.9	29619.3	9579.17	9539.22	12890.1	8908.7	8017.89	11006.5	12167.3	15023.5	12889.3	14272.8	11510.9	16970
E9Q557	46791.7	46372.6	32910.4	56220.2	47409.8	53175.7	36244.2	33927.5	36591.3	41098.9	35477.5	37834.3	34460.3	31048.5	40991.1	48122.9	31223.4	29077.2	32674.2	54392.7	47677.5	44560.6
E9Q634	40776.4	34540.9	39927.8	39684.6	40825.4	39131.5	31905	35422.3	40504	24688.4	49338.6	34521.1	18442.1	40558	30208.2	42754.2	36346.9	40388.8	58850.3	87472.5	93474.6	41481.4
E9Q6J5	2299.53	1192.51	1677.59	1313.89	1783.64	1040.18	1382.45	743.934	256005	163493	1098.72	398.557	1534.69	NA	NA	1246.66	1113.55	1238.95	13535.1	2297.63	2921.72	15921.4
E9Q735	43619.4	46062	57125.9	55039.7	47802.8	48987.1	48768.9	45421	48620.4	50281.2	53958.5	46681.3	51100.4	56682.3	69576.1	52046.9	49747.4	56634.6	55079.2	39926.9	54604.5	58229.3
E9Q784	6382.35	6335.78	NA	5922.86	5437.6	6678.52	8184.1	4415.93	NA	6323.87	7880.87	3584.54	7384.36	3690.78	5814.24	7314.11	4700.42	5912.83	7718.12	8880.43	9704.33	4935.53
E9QAM5	11628.3	10615.4	16357.9	18125.6	23752.5	13364	5653.95	6261.72	31234.4	11013.7	8952.94	11830.6	5414.25	21474.8	18191	13992	13510.4	12818.2	2690.97	8645.95	13456.1	18689.7
F6ZDS4	59512.9	45123.1	33487.8	35176.1	27262	46963	52066.7	51897.8	55523.9	51394	55005.1	43298.6	40322	33458	35507.7	45031.2	30642.7	24230.8	39986.4	63628.6	75393	30008.2
F8VPU2	11697.9	21745.4	24078.3	15962.6	21272.4	20013.5	24558.3	15356.8	37727	13560.2	20248.5	21107.2	22881.7	28257.4	24203.1	16958.5	20187.7	14884.8	5364.28	25738.6	15617.5	13257.4
G3X982	57962.5	69734.3	90786.9	94581.2	132151	98833.4	49540.7	85567.3	86816.6	83838.6	37367.7	87753.5	56138.3	40709.8	70740.1	33264.2	102889	88779.3	26550.9	65537.4	45586.4	76214.2
G3X9K3	43467.9	35972.7	20858	25922.6	23683.6	15159.6	35141	21914	39950.3	37610.8	30399.6	28146.4	28030	20885.9	28361.9	32630.3	13287.6	24087.1	30710.8	40734.4	35242.4	25367.7
G5E829	18863.1	39689.3	52714.9	59765.4	58275.4	38084.9	45600.3	41176.2	80167.5	33740.6	44635.9	33883.3	23678.7	85865	41028.8	51009	55109.3	47069.8	11000.5	32284.4	20402.9	47680.3
G5E870	24676.2	22743.5	17590.7	20927.2	21591.4	19620.8	25732.3	16273.5	27323.3	17410.1	20093.7	29787	26879.4	29767.9	18816.5	24859.9	30214.9	19471.6	21225.8	19437.7	26189.3	18674.1
G5E8K5	27734.3	34252	27853.1	26925.9	24991.5	39993.7	43124.9	32225.5	51559.2	51801.3	56010.9	48656.7	36300.2	54199.5	41374.2	78446.6	42828.9	40073.2	65342	60369.9	61704.5	52335.5
G5E8Q8	4712.43	7503.01	5857.05	2884.46	5437.13	8676.52	9326.75	9307.24	7506.29	8570.54	12069.8	3507.01	14911.2	6778.57	8437.91	14012.1	6497.5	4119.62	6279.85	NA	12786.8	5540.15
NaN	73475.3	59298.7	38778.2	42350	55019.8	46539.7	36182.7	110363	82886.2	65566	39416.1	43554.1	44998.9	101600	89392.6	43450.4	64121.6	35306.3	56562.3	97855.3	101612	47686.8
O08528	980.448	2356.73	NA	9270.31	3510.18	2160.94	5839.12	2417.43	NA	8929.75	1759.17	3468.91	3708.62	1000.58	1044.7	7464.5	5088.58	3808.59	1660.98	1658.64	3501.29	2738.31
O08529	55618.1	54327.2	60202.3	53458	55328.1	52028.4	55080.6	68942.3	75195.4	70684	54930.2	63602.4	44564.7	49118.9	46381.2	47910.9	59202.6	58988	54310.3	34289.6	29265.3	79185.8
O08532	10662.2	6855.98	22387.3	4279.17	3126.38	5891.27	9441.19	12949.8	10639.4	23305.4	9778.93	12715.9	6226.46	6321.45	7104.05	13205.2	7198.8	8711.41	7389.66	8184.79	16575.4	7607.79
O08539	45139.2	51448.2	48263.5	55902.4	27404.8	47856.1	39564.5	33759.1	49250.4	49748.5	42642.2	33979.8	48969.6	41624.4	34494.1	32351.8	31994.2	34931.5	44184.5	63128	75342	31940.6
O08547	49645.7	59111.1	49477.6	60522.1	57088.1	46406.3	58088.8	38933.7	53332	49442	43350.1	42526.1	39469.1	42534	70562.7	36558.3	65411.4	49670.6	68308.2	29691.1	52690	64498.2
O08553	86622.3	68626.9	89637.8	84529.5	79564.4	73511.3	93449.1	83091.9	89188.8	126455	106188	102078	121334	105742	77209.6	117018	78079.9	71552.9	98621.6	80064.8	92019.2	85942.3
O08573	99472.8	90606.7	135758	134476	209934	200851	68469	157248	180498	212226	147635	114830	156792	115414	135388	80196.6	196526	202340	156152	182589	101829	168499
O08579	71142.4	73530.2	42096.3	32168.2	41487.3	49166.4	45787.1	46246.7	54759.6	52005.1	70986.1	64518.3	46364.8	53881.6	46451.4	51963.5	33669.1	52808.4	89155.9	69388.1	144563	55998.9
O08582	18529.5	8684.54	25918.5	8525.59	18767.7	9121.61	14659	9056.87	54964.8	8987.2	8444.72	13010.2	14868.4	20820	20230.6	6364.46	8083.94	10461.5	10319	19403.1	31325.1	27210.5
O08583	130086	59389.2	62978.4	69500.9	47975.1	39047.9	54124.8	63700	86892.1	78619.9	58185	61105.7	113364	63527.7	78537.3	92741.3	37348.6	69565.2	121363	62918.5	65889.3	26897.6
O08585	276687	216811	177611	168214	151456	235867	243737	232953	305176	100342	282301	226264	79403.5	4525.37	161569	218963	176961	158900	295692	39012.9	49367.9	364977
O08586	49196	60265.8	61923.6	52343.9	63726.3	62131.5	41662	87062.9	59048.8	33799.6	42812.4	75268.2	77709.3	57129.1	46188.9	24510.4	84792.2	44407.2	41240.7	47160	38546.7	66554.8
O08600	135843	106642	129806	103919	127264	107181	93144.6	100585	147009	63536.4	155484	156024	96671.3	223568	158576	117921	122675	92060.5	124509	94240.9	72151.6	149890
O08601	81100.8	94906	196144	158419	186881	135924	102346	147545	154754	140316	89808.9	118436	97920.2	141939	174549	128022	230422	209829	79690.3	137066	82889.4	245627
O08609	26189.3	22966	28969	29249.7	35481.9	48922.7	41352.1	43991.1	41155	54197.3	25770.6	39377.4	27686.1	23013.6	24120.3	24573.5	43066.2	36489.1	46622.1	17412.4	61376.2	33703.9
O08663	72245.6	54405.7	65112.2	53882.9	45380.8	66405.5	61986.2	59763.1	60435.5	73506	45846.6	67901.7	78211.7	59408.1	45489.9	69929.8	54503	52481.5	89603.3	110547	133385	59209.6
O08677	182517	150984	141947	104802	80310.9	113618	234843	141384	238381	137334	156668	132875	407880	157977	251424	330416	141459	102382	171955	248892	248177	104888
O08692	24512.7	9125.63	27261.7	7214.12	13885	30754.6	80893.2	12051.4	51895.7	36622.3	31895.2	80733.3	43191.6	30298.4	24584.5	69758.6	64001.3	20641.3	24348	18944.1	21173.4	48352.5
O08705	482587	531655	758559	607667	644455	462234	483028	578842	847236	289485	689411	555023	448116	916468	944507	660658	713188	755619	500764	403931	278544	505382
O08709	644225	843520	470613	455198	497095	477690	469269	636221	891644	819051	393046	638214	676176	383349	366535	381002	424353	486337	610225	524101	1.12938e+06	329938
O08715	62658.4	45732.9	33253.4	42766.4	43660.3	46390.7	35184	41722.8	41031.8	40558.3	57439.1	25045.4	58889.5	45616.4	47325.7	29427.6	39195.1	37147.9	53028.3	70196.2	108440	42012.8
O08734	25014.5	NA	NA	7610.41	NA	15785	50058.9	NA	NA	NA	NA	NA	NA	NA	33869.7	NA	NA	31299.5	NA	NA	14815.2	31861.6
O08738	52405.8	30561.5	33716.1	34691.2	35098.6	39386.3	26966.3	45937	137496	48142	33008.2	59718	42626.3	41521.8	44871.4	29031.4	40203.8	35050.4	36748.4	26554.4	22110.2	41747.2
O08749	203200	234135	186539	230252	190702	241200	157921	272825	431834	228900	161869	255699	184116	473115	217774	274887	232434	158969	131025	174419	268370	203040
O08756	161015	244685	330652	297647	359713	327880	208505	255261	338031	231862	222064	300289	238710	435574	342920	222327	405936	251826	138026	210013	175935	271792
O08759	22607	23430.9	19350.9	24467.3	23259	25260.3	28888.7	24741.4	32686.5	28404.6	21445.4	19464.7	14158.1	23022.4	24097.2	18542.1	36180.2	17857.2	20656.9	37420.9	26548.7	27039.9
O08784	48344.6	20422.2	16318.7	15700	16670.8	17662.9	17916.7	18711.5	17527.7	17319.5	13526.3	16986.6	17554.2	15804.2	23182.7	17638.3	14857.4	10364.3	30357.6	24498.7	43617	11407.1
O08788	37273.5	30897.3	26799.7	31203.2	29048.8	27279.5	31035.7	31388.2	37888.8	35254.2	27065.3	29906.6	24981.3	23044.5	22696.4	30686.6	29256.9	30098.2	31397.4	38073.4	47454.8	30674.4
O08795	188785	131578	118421	120397	119970	149725	141609	149409	131495	176739	151105	139044	183737	104862	117734	114229	109969	108069	240574	288036	442828	116600
O08807	150424	186870	234367	253609	220138	137819	181081	120258	252583	119868	97391.3	148186	143025	137394	111455	103228	129568	159136	101489	40997.7	66082.1	226421
O08808	31696.1	34883.4	28771.6	31694.9	28864	22364.3	29839.1	32550.9	28008	37277.5	38266.1	29932.8	27976.9	32679	37922.2	41463	39139.2	36554.8	61117.1	36951.9	37166.5	33784
O08810	36336	26980.7	30001.3	38477.8	42259	43579.7	33786.5	42319	48761.4	42728.8	32111.4	38823.2	36911	54749.7	56293.5	52204.7	38446.3	43113.2	21085	33880.9	21229.2	31429.7
O08856	3848.53	3632.71	2712.02	2802.78	2859.41	4156.63	2861	3350.77	NA	2506.91	12614	4387.71	3387.92	7855.72	8687.43	8023.76	3765.08	1776.61	6121.51	4186.48	2945.65	3292.45
O08912	1447.13	3494.5	12280.8	16551.8	3281.76	3367.33	1165.74	8472.23	24888.4	2645.28	NA	23085.6	4182.92	2872.96	2278	NA	14893.8	3178.91	NA	5144	1008.4	14819.8
O08914	103924	109543	91613.9	80214.8	96118.9	135166	80383	106708	99416.2	116330	121063	109514	108606	100629	108642	77731.8	129679	90212.9	97005.5	92892.2	74332.9	102541
O08915	49163.2	32134.4	23108.3	24721.2	22862.1	20754.6	29636.1	18816.8	45773.2	29500.9	42878.4	23622.1	31315.8	29069.9	25108.4	29507.4	20010.8	20891.2	31378.4	35771.2	46896.4	21563.8
O08917	12338.1	20932	28976.1	27881.8	24528.1	25606.8	23823.6	17793.2	45399.1	19332.5	25054.1	18444.8	16074.2	24624.8	40935.6	31424.8	25912.7	27055.7	10363.4	15297.7	15304.4	27710.1
O08966	71286.4	98443.7	92107.6	117358	126062	94873.1	78173	92887.9	133826	63797.4	65079.8	47196.7	74212.7	27312.9	65391.1	45957.2	87365.9	95339.6	58565.4	105773	123401	75241.7
O08992	12983.2	14197.6	15966.5	19879.9	15827.3	5220.79	14523.3	8575.53	5748.06	8408.75	10207.8	14737	7082.77	25733.5	10479.4	10635.3	9195.81	11672.8	18327	4018.09	NA	11922.4
O08997	50855.1	70116.5	17719.3	28501.4	302381	32128.2	40632.8	23066.8	275693	44007.9	45526.3	34941.8	55414.9	25128.9	46204.7	32285.1	20362.9	20831.2	89399.4	67593.9	87353.6	16385.6
O09012	48711.7	37713.7	31970	32271.7	27795.6	41528.7	33839.5	42231.4	36154.4	51787.2	43389.8	37796.3	48272	26954.3	31107.5	35642.2	38298.6	42922.9	75623.2	96640.4	105767	40416.6
O09043	56059.3	52216.1	40292.7	57847.3	40646.1	44481.6	111268	100499	109360	108134	123510	110237	130976	123133	96637.9	98494.2	88591	71252	82147.8	88605.4	123683	83931.1
O09044	65176.2	53889.9	33938.3	34810.5	37397	45770.7	56709.6	40199.9	83494	53863.8	52731.8	32496	40316	41467.4	32254.5	46249	23824.2	33618.9	59742.8	66965.1	100045	45614.1
O09061	291402	208828	246882	237491	226436	260176	197287	249581	275186	245490	207378	232962	244267	181426	233356	160366	251669	227746	243022	168939	200776	208808
O09106	14155.9	18633.4	13136.1	28796.3	24206.3	8444.87	17272.9	8030.38	10232.1	28141.5	16655.8	9131.39	18748.4	24435.8	24662.5	23710.8	10528.5	18534.4	19653.4	16717.1	11803.1	11039.2
O09110	7097.15	13808	26091.5	24280.5	28445.2	19756.1	13448.8	16068.9	19482.1	10638.2	5835.95	6130.34	10271.5	9615.24	14906.9	16245.4	30706.7	20513.8	9189.71	16140.7	12753.2	18732.6
O09111	148849	135569	184507	190485	189951	164649	137066	147821	185318	144637	52183.3	156030	144731	325779	305009	335666	184146	207776	82215.1	136739	154402	199038
O09117	42172.9	31344.7	72642.4	65652.4	68366.6	75049.9	20234.7	104211	NA	98582.3	NA	88904.4	89084.5	56199	95316.4	47211.2	69574.6	53545.1	33065.7	62813.1	53077.6	37920.7
O09131	322784	322702	350098	250050	319508	286976	342953	222797	282934	283377	417248	383146	246404	254044	288763	323321	133567	197593	350049	231019	382900	200416
O09158	51948.5	90080	76329.9	71602.3	81137.5	75937.3	60027	73397.8	85696.2	47790.9	75785.4	113807	138495	174487	176698	136543	69179.1	69397.2	41342	49184.5	69898.6	100700
O09159	43821.5	36386.6	50543.5	50878.1	38011.9	62135.7	37059.9	42768.2	34818.4	36902.4	59336	55407	49352.4	43601.2	50794.1	41204.3	36297.9	32656.3	34141.9	35068.5	47217.6	41957.9
O09164	45191.7	39332.3	30609.1	34433.6	32031.2	36757.8	57902	35317.1	38413.9	48242.3	37523.9	50996.5	57226.2	47794.3	31890	55051.9	34879.4	28492	41902.1	39783.8	82699.9	31666.8
O09167	124217	152006	322901	306695	233755	355401	114652	277451	226590	259487	126399	212419	190168	334557	259177	167300	365627	282163	112375	291546	113235	307677
O09172	117064	133651	145480	165744	113787	233492	109852	221173	353460	115232	172960	132227	119180	100865	176937	159564	94369.5	261033	105216	98438.6	99775.8	142594
O09173	199742	366002	356867	581577	525849	420636	166492	330916	546367	295726	150042	291985	214047	396498	353518	258719	569396	572793	107174	278802	160276	276746
O09174	270069	204329	211826	148305	175341	207788	198696	182434	258545	194438	200512	166244	213826	232819	140814	199570	178684	184070	357054	204996	174833	215905
O35071	32101.2	22480.2	20872.5	22221.8	19580.3	32200.2	28939.9	25654.2	42676.1	28823	18191.4	27043.2	16013.1	17721.4	19629.9	13365.6	25573.6	19603.9	13502.9	30975.2	29373.6	28753.1
O35074	48453.2	61593.4	140589	114696	101771	74519.1	128152	141478	102188	149772	62883.2	75718.3	111715	55248.7	61942.9	55533.8	99032.9	91527.6	85413.6	61760.9	64547.7	112916
O35075	224565	111621	156785	71983	69088.8	128840	208332	138067	190657	86949.3	171358	71936.8	20960.1	149524	173543	45118	45145.5	68822.9	435699	230365	653844	143510
O35114	135932	73388.9	63820.5	92467.7	69812	121720	134776	117595	136919	137835	130051	95238	139288	117590	123035	135301	85198.1	77359.5	143793	195291	192916	102195
O35127	50401.3	54768.1	48369.8	45866.1	41575.3	56420.1	55276.4	55539.5	73298.4	65343.3	54970.8	50075.7	51165.5	35822.5	40366.5	61134.7	48066.9	51666	54100.7	84953.1	91438.1	51515.2
O35129	196793	203240	416162	464036	458604	383901	216904	308590	385121	340012	199660	342515	268766	483248	415694	266662	532259	352458	146823	303792	247666	308165
O35144	3304.18	9804.5	10717.5	12405.3	8717.91	13569.2	17780.4	15544.6	11575.9	30286	4194.14	23472.8	18408.8	65770.1	6366.75	3126.56	17113.6	15825.5	10276.6	9901.87	32210.1	4320.9
O35166	65146.4	38330	34165.4	36044.7	33131.8	29262.1	41690.1	47360.9	37855.4	40249.7	43276.6	33427.4	52007.4	32213.1	35557.8	33290.3	24769.2	42082.6	60480.5	73680.8	107895	32595.6
O35215	657896	606999	630044	366618	414004	260532	587390	293692	646142	375497	483400	440232	479218	671061	590382	574805	254281	332313	627132	542306	493706	371978
O35218	23558.8	23452.3	21924.8	35142.9	26921.8	30278.7	18141	26201.6	23203.3	34974.8	25900	33065.5	22199.6	32382.4	22966.3	30488.9	27999.1	11750.7	22844.6	22435.4	NA	31389.4
O35226	373110	273815	200569	216249	209473	182390	220465	231496	189145	297634	236397	253660	170919	116375	169380	200292	192671	218004	279358	358936	459784	212106
O35250	48476.7	27703.2	36768.9	24061.5	25407.6	53303.7	37041.1	36969.1	34434.7	50369.8	43362.2	30061	51321.6	38444.2	42486.7	34092.8	18660.9	37776.2	48230.1	36712.5	48259.7	41639.9
O35286	35196.6	27519.7	36277.7	47920.7	44831	50989.3	41278	42487.4	46035.4	27747.6	48821.7	47953	46392.3	127795	49927.4	44000	61577.1	37635.4	18117.9	27215.8	16316	59301.8
O35295	75203.5	73055.4	63923.4	59262.5	54017.7	58572.4	73818	55303.9	115929	69870.8	67800.8	61886.3	66452.8	65490.1	50931.5	54069.3	52161.4	39014	59868	41547.3	83482.1	47501
O35309	56529.7	52655.4	62726.1	69418.8	64008.1	53057.3	55049.9	46006.1	45512.9	50895.7	33434.9	49877.2	36859.3	41787.5	38421.4	24388.6	41338.7	45062.2	44364.8	50188.9	67636.5	52728.2
O35326	146575	116854	105185	102842	112501	138780	129347	123391	95138.9	140777	132898	131309	115521	97735.1	120171	130729	97630.4	90249.8	114844	167546	184186	84519.1
O35343	23299	21468.6	23831.4	22135.8	26493	20537.9	21396.6	20167.6	38518.2	27240.6	24292.6	31104.6	24344	9330.34	20739.8	21356.7	22365.8	26638	25348.1	28045	46057.1	25114.7
O35344	37391.1	19671.6	36180.7	36337.6	27873.4	21450	23856.6	20856.5	31952.4	21247	45684.2	37752.9	44754.2	33954.1	21042.4	33309.1	20445.6	21220.2	44459.3	27433.3	31822.1	28790.5
O35345	26795.8	29104.4	22904.5	17634.8	22474.2	32981.2	25998	29703.2	38656.8	46391.6	27368.9	20443.3	29237.5	21232.1	22170.5	23692.3	33960.8	23486.1	34165.7	36428.9	41241.8	24555.5
O35350	21406.3	25035.1	50077.8	51415.2	47800.5	38687.8	27136.7	33317.9	56645.2	40551	15461.9	22937.8	37724.3	36448.9	35533.2	22216	38120.2	27698.3	13463.6	38883.2	13146.8	35526.8
O35381	374055	293558	196144	187974	207291	262004	340200	341590	191126	372107	478920	371427	288820	235299	247942	342869	249698	239350	420552	535897	673299	208490
O35382	13518.2	10173.8	18270	21109.3	19372.1	12107.2	16871	14761.5	22909.5	14303.3	12531.3	14198.3	12312.3	18371.8	18411	16646.9	17303.8	17033.8	9439.01	14287.3	12577.7	20007.4
O35386	300216	143797	98930.8	86007.6	140744	184522	159101	93514.9	285826	119533	176721	269531	183000	183409	181840	362237	120938	129590	221806	126160	199354	133248
O35387	62708.5	54537.8	29872.1	30746.9	40119.5	37416.3	57783.5	44792.3	42736.5	38905.5	76981.3	42694	42181.5	61322	43734.3	52550.4	42156.3	39129.6	45910.3	43917	60119.1	38449.4
O35403	67873.1	64023	72517.3	60897	127676	52869.3	14049.4	29128.6	34136.7	33515.6	45596.6	30789.2	56727.5	14032.3	41729.3	45984.8	47303.3	44646.8	39488.1	50211.2	53565.4	42612.3
O35405	25322.6	19210.5	29855.2	34156.6	36256.3	56650.6	39467.2	55984.9	39700	62064.8	42772.7	61283.5	51529.7	69552.7	59546.4	51383.9	40739.6	28018.9	66030.6	56209.2	84256.9	36442.7
O35423	174718	198449	211455	167037	181811	207259	236392	286160	297286	248637	117218	155915	215134	196269	154799	134987	203299	191420	208626	121952	176181	183235
O35435	77890.9	79492	68200.3	67422.4	67253.1	68767.9	79648.6	80362.1	71649.6	80617.4	115110	91398.5	86406.2	102696	98930.8	111194	78733.5	64159.5	109257	71521.3	85157.9	62377.6
O35445	262994	96617.9	105184	93399.9	86059.3	118256	97768.9	122363	52346.9	112814	73541.8	94452.4	61084.7	134063	242484	47722.5	120549	98907.6	176619	98394.8	131329	116699
O35448	49289	42361.8	50419.7	52724.8	32189.5	78713.7	57840.5	68281.8	44121.5	68307.7	52599	59117.4	87537	42786.7	67713.1	64222.5	48067.1	47340.3	80509.9	90857.9	96873.2	62089.1
O35453	27774.6	24310.3	18385.5	15106	22814.8	14435.9	23736.9	19473.5	33967.2	25690.1	29820.9	25653.4	17922.8	22572.1	22135.3	25596	27139.5	21762.7	27141.2	17509.8	14354.5	20799.7
O35459	208219	115176	87805	104199	107537	173629	179124	290970	293686	231794	208054	173509	251579	164873	161980	108156	119702	105248	116509	156719	223587	102733
O35465	66410.7	46901.5	51251	48836.5	46258.7	58951	59567.1	70419	61557	64395	49532.8	58153.7	66122	69925.5	50914.2	45495.6	73523.6	47953.3	92094.9	86783.3	73162.1	67027.7
O35488	74114.1	90702	159503	161269	159650	146866	96748.2	104004	164190	96943.4	65073.7	89103.1	99331.8	172603	157483	73360.8	144374	120294	47021.5	97763.8	72577.6	147108
O35490	73897.5	100488	132549	76914.7	77112.4	140405	79971.9	70658	757059	126046	78844	111359	94739.4	104373	106719	105135	116951	73772	59044.4	72176.8	55389.7	101820
O35516	7085.01	10567.6	7228.09	13691.2	5775.28	13154	14980.5	7895.76	17462.3	6157.91	14320.5	10308.8	13774	9108.1	9869.51	17503.9	7331.45	6726.74	14703.5	13977.4	15294.3	6766.97
O35551	30350	28719	20560	18440.8	18709.9	23026	28087.6	23369.8	28522.9	30211.2	23682.3	19070.6	27204.7	14993.8	14256.3	21843.3	19612	21707.9	41052.3	52473.5	71370.5	27191.9
O35593	173888	152126	180419	209744	184676	141342	94425.1	102589	85435.8	147266	153339	149862	120039	194193	187719	75125.6	143979	178622	165060	118106	119164	215375
O35598	2656.38	4387.79	6481.34	7275.42	3980.81	3846.62	1355.06	5594.47	103316	2666.68	3136	2456.57	4431.17	4256.73	1244.05	4591.33	5038.47	3805.68	NA	1772.36	NA	4441.82
O35601	3779.79	5065.59	3608.61	8264.79	6986.41	9219.57	12144.1	13547.8	16901.7	7907.55	2873.32	7274.28	10460.7	8333.39	14184.2	6760.51	13495.6	4635.53	6439.07	13669.9	21873	2289.66
O35604	77622.1	56159.1	88068.9	46233.8	58484.8	90975.1	108273	107083	84012.8	75723.8	101322	137216	104059	111326	82447.3	97219.3	53748.3	59897.5	60386	71700.5	98954.5	78190.4
O35609	29689.7	27697.8	37880.8	26914.5	42385.2	34054.9	22485.7	28177.7	50792.4	23551.7	28014.5	27626.3	27301.3	40518.4	32360.8	28653.5	31211.5	30502.4	17211.2	34933.5	24367.5	26432.4
O35623	66500.2	58663.6	48634.1	44877.1	35490.1	61263.7	46802.8	53597.2	62363.4	66230	42938.9	40517.9	72506.1	215889	28434.9	35067.1	45800.8	48657.8	91493.2	102621	130688	52673.1
O35632	44345.7	38223.2	30242.7	15560.9	27156.5	34209.1	30073.5	25711.5	23306.3	30768.3	49983.9	40910.8	42186.7	19913	15992.4	12601.2	10554.3	16169.5	32727.7	27242.4	43338.9	17141.5
O35638	17435	17297.5	21457.1	14513.6	12524.1	10951.6	11452.9	22331.6	23903.4	13076.4	17808.1	24779.7	1255.78	23409	13925.4	23358.3	21328.8	11143.3	20057.6	15723.3	14759.9	11457.6
O35639	90092.4	78828.6	108297	89890.7	68171	102809	98363	91131	152175	150430	98860.4	81272.8	87405.5	55345.8	48255.8	85566.5	71194.7	64940.2	81527.2	97882.2	170267	71612
O35643	72533.1	88726	73881.7	89972	69315.1	84463.1	82310.8	93193.8	57344.2	87269.3	70802	61957.7	65940	89077.1	78387.5	86362.9	99321	93456.9	79838.9	80320.8	58952.8	79930.3
O35648	29885.2	27409.6	28774.5	27979.6	25239.1	34096.8	17992.9	17776.3	15425	23774.4	30577.7	35944	17959.6	42169.8	18543.4	20270.3	6705.38	130414	17325.7	38501.5	39947.3	23056
O35654	2843.55	8215.16	5792.48	7807.4	5611.6	3185.75	8298.79	6823.91	NA	5192.79	7997.96	6816.73	NA	NA	NA	5965.58	8213.99	8602.11	8748.25	7449.71	5862.15	8936.41
O35658	254742	229621	127406	130232	162317	196849	208438	536315	423577	359097	284630	185711	347660	341302	164377	363384	125111	182062	286986	315608	321989	133651
O35660	186365	182731	171093	117900	155013	174386	165667	142626	173587	267249	140738	265410	185582	192588	112089	100806	229073	193617	256890	200380	381718	201878
O35678	46639.3	54496.3	58554.4	41493.9	47586.8	41858.1	48115.4	39915.7	85787.3	34579.9	28956.9	22670.6	23504.7	36363.1	56906.8	12272.5	41591.1	40383.8	47351.4	19008.7	33782.4	53818.3
O35683	111381	127530	189940	135085	168987	153619	135645	138295	161882	107495	128521	141040	131438	279947	210592	202470	152118	138882	115383	140250	116256	151117
O35685	183795	103738	131484	121304	128226	148935	157621	138755	114914	137094	153197	114335	108952	102728	98016.4	103624	138455	120597	184257	195033	241648	134408
O35691	25269.8	14379.8	18061.3	15775.2	10752.2	24653.2	17243.2	23173	19116.6	19455.3	26941.9	18123.2	16770.7	14658.7	27195.6	32768.4	19894.9	12395	17311.3	33778	28816	19284.9
O35704	18935.6	15487.4	27639.2	27737.7	24715.5	20884.3	22315.3	17627.5	26513.8	21698.1	19475.5	13834.6	NA	28348.7	27627.5	20410	39823	31698.1	14296.9	23885	23947.3	24985
O35711	34593.9	28377.6	22807.4	25003	21628.5	21739.9	25369.3	34859.1	28737.5	30206.9	27689.3	19466.6	23546.9	23146.9	15926.1	26230.9	18291	19834.4	29892.1	40079.5	50143.4	22284.4
O35728	37620.4	24061	33755.7	25195.1	26994.1	32358.6	28161.1	26555.1	42813.2	22267.2	37656.8	30230.9	54216	82468.2	72362.6	35683.5	47349.7	24315.4	17010.1	64809.2	32279.2	30152.4
O35737	50800.4	48022.5	36131.7	38184.8	39351.6	47028.4	49872.6	36407	46883.7	75057.4	52777.2	51661	61705.7	33110.4	38221.9	62923.3	40056.6	20118.7	63686.9	66856.8	77213.3	44257.5
O35744	49605	29893.3	32510.3	26610.5	15988.2	32251.2	337951	132810	141020	206757	234807	180482	216504	308235	155033	303719	154793	100353	257363	304591	520827	98540.2
O35841	107624	100674	75870.4	72744	90540.8	118461	80940.8	117992	55375.9	184689	124460	125907	146689	115878	81608.9	110871	114868	78066.9	105122	220367	234224	89973.9
O35857	82837.4	51635.2	78953.1	82190	80111.7	79533.3	49525.3	74668.3	72452.9	62666.1	88048.5	89848	89814.8	110927	166575	77078.7	99558.5	75662.7	88415	94828.9	82950.4	117698
O35864	39771.1	38151.8	61646.4	61718.6	61772.6	44276.8	43093.6	40458.9	49591.2	36528.6	46334.2	34279	21107.9	51893.7	42522.2	23954.2	54648	57784.1	25743.5	44793.4	30183	53188.7
O35887	150507	127068	122958	104879	110529	81595.5	131712	100101	248783	115863	191397	94674.8	83770.4	127101	69792.6	125187	118049	94942.7	220687	208823	254851	110380
O35892	17445.4	18585.3	22284	26054.6	20130.7	7226.41	20676.9	13969.4	24303.4	19786.7	17793.2	16092.6	11884.2	9309.73	14738.8	21735.1	12596.1	10657.1	8401.18	11730.8	12318.6	14207.3
O35900	20686.8	21537.9	33391.2	27590	27865.8	31191.1	26056.5	26681.4	25203.7	30675.2	22493.7	25536.6	24702.2	28089.9	25091.1	21225.6	25417	21778.4	24197	19879.5	38481.1	29794.6
O35930	12482.3	6878.31	12415.2	9136.39	2006.75	25423.6	26155.4	36167.2	NA	44307.5	26411.9	27265.7	51798.4	40855.2	37608.7	13988.3	29313.5	11468.8	9228.68	26300.7	20780.8	22039.9
O35943	139162	204814	145851	124625	220590	178253	134819	162147	177051	193421	146840	172765	260847	123149	73199.7	156233	233409	159567	175527	275975	326160	220312
O35945	139402	129763	188066	155612	218065	141820	125840	236279	232320	188636	153054	182649	167328	161250	174062	231709	247910	216423	235296	354988	135302	542523
O35955	153288	88292.6	125891	268778	118855	120071	186740	168991	NA	162331	110675	116219	100465	157013	70799.6	147283	130729	70681.2	103772	70066.2	81482.1	181430
O35963	640718	528945	567781	733131	825695	502131	427144	159501	32194.9	672426	223226	222086	101907	291001	688350	610763	75332.2	397396	131853	221516	942431	940117
O35969	165909	192513	116782	130621	118519	155448	168282	167845	161735	215286	189766	175017	218909	101725	107858	91114.8	141510	139423	167810	219322	333548	121793
O35972	89844.2	79515.5	76784	60614.8	75490.3	90166.2	87579.3	100107	58219.8	96481.1	95219.8	84000	92577.9	102057	76659.4	96760.2	78649.2	51368.2	140720	101900	129057	66501.7
O54692	14373	10967.9	18020.9	9779.38	11616.6	13095.3	11404.8	15781.1	13823.9	19083.2	10666.6	13541.2	19858.1	20431.1	7822.38	11103.9	8213.44	12060.9	18795.2	19183	24842.6	11359.9
O54724	38290.6	33263.2	67379.6	30999.8	44650.3	44017.3	30838.1	33876.7	39837.4	54343.9	35896.2	53768.3	57752.1	50524.6	33466.3	75114.9	26799.5	22146.4	49044.2	47001	45282	27959.5
O54734	214524	209708	382126	349827	401896	399749	253022	376770	336387	344178	135100	261437	182046	324112	286398	228522	441898	323061	125192	164203	181764	370551
O54749	108374	89319.8	116600	106502	133712	90178.1	64387.1	70292.8	82257.5	80788.7	56761.7	92864.9	91093.5	81003.1	76462.7	74385.8	86632.5	100202	68207.4	73566.5	87698.1	95180.7
O54750	62922.3	59039.8	56038.6	12978.5	15264	7033.55	11086.7	77388.6	104900	70892.6	91568.8	46450.9	77807.1	41598.5	41430.5	105430	96974.5	13570.8	112178	14059.2	56831.6	66440.8
O54754	19493.5	25607.4	33337.4	35741.3	33881.5	25085.5	18541.7	25060.1	35140	28137.8	15440.6	17192.5	18170.3	18129.3	26466.1	18853	30904.2	32517.1	13314.6	35051.9	24778.5	28764.2
O54774	51701.5	38482.4	49078.5	47403.9	61350.2	43559.8	43306	63656.1	41761.1	61295.7	27199.8	25785.9	21050.2	51389.2	27660.8	26910.2	54040.9	46366.4	67713.2	53614.8	54833.1	61938.1
O54781	11538.6	9390.48	11843	8837.08	7523.73	8116.66	10038.8	7701.17	NA	3328.37	4497.97	11285.1	1930.86	9777.5	8039.69	10147	11565.4	4816.03	2998.1	11219.8	10940.7	8356.49
O54782	62442.2	50661.6	35921.7	45730.5	41612.2	62594.3	70171.4	62501.9	46703.8	63854.3	52547.2	56385.8	53105	30253.3	47534.5	44859.9	45367.3	46035.2	48493.3	47555.2	86209.7	37837.7
O54784;Q8VDF3	10044.5	7831.7	10741.6	11116.7	8273.69	8934.08	12563.9	9849.25	10948.8	6208.47	12093.3	8440.71	6531.19	9541.17	10419.2	5604.35	11606	14072.3	13908.9	11463.8	10727.9	14732.4
O54786	13448.6	11918.8	10428.3	16733.4	15083.3	16463.7	20597.9	11028.1	62402.8	14826.9	16132.8	15451.8	8884.95	17060.7	14919.6	37272.7	14825.8	20152.1	18180.9	16833.1	21545.7	28635.5
O54818	77192.9	46191.2	53488.7	69249.9	37737.5	41988.5	51291.4	47406.5	45403	49728.1	60208.8	54305.3	60992.2	83479.9	41743.7	53675.1	47524.8	48721.2	66880	87253.2	119763	39192.2
O54824	19000.6	20746	15820.3	21562.5	25071.7	16623.8	25102	20912.8	12042.1	27573.9	20682	21909.3	25692.1	13375.8	14930.3	15223.7	17516.5	15398.7	26375.5	14904.2	20570.4	13516.7
O54833	32867.9	28349.8	28896.6	25976.7	25949.8	25623.2	27654.4	29642.6	28854	37469.2	35251.7	31204.4	30125.6	24239.8	23526.1	33532.9	25299.1	20858.3	38560.1	20079	35386.5	28673.8
O54865	14776	14463.2	15046.6	19457.4	17937.1	22467.2	21357.3	23978.7	37701.2	26094.2	17956	25021.6	16080.6	16553	21468	11635.2	30510.6	18688.2	7984.1	14929	14730.2	24832.4
O54879	47660.1	22494.1	15264.2	17938.7	9569.7	61359	37410.9	60294.5	54705.5	66142.3	83415.8	55048.4	82057.4	41981.6	81345.1	21322.8	55334.8	49637.4	26654	34265.7	51165.5	68167.2
O54890	12370.2	10256	8292.5	9950.62	6679.46	6635.53	10552.4	9675.28	9784.19	4321.64	21804.8	8484.78	23566.4	9188.25	8761.56	14927.3	7588.25	4153.88	10269.2	11126.9	16191.6	8892.84
O54916	14936.4	23861.7	12086	11594.6	15830.5	13802.7	21149.2	14276.4	14679.5	15598.1	21319.6	10791.8	13617	11782.9	8008.17	18201.5	11921.2	11111.6	16396.1	20704.2	24745.6	9958.62
O54931	35357.8	38391.8	25949.1	26689.1	19489.9	24800.4	33365.6	28765.8	37678.1	25739	38124.1	27434.2	40590.8	33913.1	24953.6	32127.7	24293.9	28953.7	34471.2	47955.9	58462.6	23659.7
O54941	18057.7	19930.9	14487.9	19400.1	16238.2	21325.2	22777.6	15907.8	21934	21828.4	23398.2	19148.4	17817.6	12501.5	14675	17436.6	13943.4	14953.7	20953.1	23567.3	29334.7	16335.7
O54946	27708.3	25973.2	NA	NA	24600.6	42040.1	47012.5	50144	NA	38134.4	NA	11148.3	55823.7	NA	NA	NA	20306.7	18970.4	30515	57457.4	84542	NA
O54950	35113.4	15386.3	20774.4	21187.3	15975.1	18250.7	17869.1	18909.6	21693.5	16437.7	17996.2	14045.5	11169.5	16315	17861.1	32901.6	21330.3	29966.8	13605.2	18563.9	NA	33533.7
O54962	56354.5	31399.6	62726.4	51374.3	51279.5	67410.2	37538.3	53010.6	59183.2	64908.9	89361.7	46237.9	55174	72022.4	81960.8	70136.5	79600.2	58492.3	116779	97032.7	148444	66713.5
O54965	55082.9	45265	46558.8	26683	24467.1	46312.4	37794.1	35014	26924	40595.9	40560.1	37077.6	28899.7	51080.3	49180.8	53467.6	39645.9	30485.8	30587.2	47874.1	84452.2	36737.9
O54984	64878.7	78286.2	101477	60240.3	66511.5	131410	96054.6	109068	122070	104936	61747.5	98330.9	30260.1	63899.9	96585.5	38239.7	72789.8	68153.2	97146.3	109407	116505	84845.4
O54988	21475.9	17639.6	21014.8	16844.7	15888	9907.88	19808.9	10373.5	32509	13131.6	20778.9	15688.2	16401.1	16539.8	16458.7	13918.9	10259.1	15530.7	15875.5	14236.6	23185.8	18185.3
O54990	6493.75	18244.9	NA	NA	NA	13091.9	22823.4	25820.6	26700.3	32594.5	13183.7	NA	8872.86	NA	15670.5	10192.7	38099.6	21912.3	22671.8	45884.1	69932.9	30661.2
O54998	2605.65	59394.6	1847.88	5276.61	2646.99	1804.37	42539.5	1032.36	30664.4	NA	NA	4767.62	NA	8362.08	NA	NA	23312.4	1798.37	2443.1	55242.3	26194.7	51487.3
O55003	83481.7	50707.8	32146.3	18151.2	32469.5	40681.1	42821.2	27107.4	49891.1	50561.6	57509.2	56232.4	75683.8	90792.9	80969.9	85674.9	50322.8	22142.4	32290.5	42403	70060	51353.3
O55013	96767.7	98221.3	71649	90161	99495	101840	114823	56451.7	152112	77425.7	86896.5	77868.4	85158.8	61733.2	72920.4	83386.3	75286.2	100000	91194.2	111892	137473	89528.8
O55022	338087	166063	109129	153066	127169	256564	129579	182238	350201	202095	101698	100763	176503	80187.8	117319	108583	119567	147946	174467	251224	377938	133579
O55023	44670.8	46896.5	72100.8	83742.5	70974.3	56478.2	46780.8	43696.2	37389.5	40938.2	29150.7	37670.8	45714.8	39616.8	52887.3	54510.4	71936.7	49287.7	30830.2	56904.8	30633.8	48410.9
O55026	6114.24	6387.12	12988.4	5928.95	7517.36	7462.67	8039.83	7978.37	NA	8113	9475.73	10654.7	9316.91	5305.17	9874.2	11692.3	6475.17	4027.96	3604.9	6069.06	6984.83	8429.43
O55028	40786.4	45702.3	29993.8	31128.2	27172.7	40282.3	53968.4	44315.8	35126.7	43495.7	44199.7	42912.2	36444.6	43660.7	55618.8	27115.5	33683.5	37938.7	41858.1	42427.4	64545.5	29788.9
O55029	42893.5	34083.5	82140	51751.1	56489.3	59096.6	37699.8	59227.6	75366.6	59096.7	37322.1	42768	28200.8	50333.4	57416.3	35250.1	77986.2	61595.6	36252.3	51616.5	50624.1	74750.9
O55042	44121.7	29175	27444	21513.8	25437.9	40274.6	33455.1	30709.8	52708.4	11702.3	39115.7	29172.1	137900	70015.4	100631	66754.1	20755.1	7852.91	38104.4	61184.2	68734.2	14715.4
O55060	132775	47315.4	50502.9	100204	64394.6	83812.9	48339.1	61379.4	46225.5	131079	61765.9	107291	104929	91445.8	83641.4	79676.4	92674.9	44631.2	93184.4	71707.5	63869.4	81524
O55071	33610.5	42697.4	41119.7	41989.5	37960.8	38613.8	90734.9	62517.8	86073.4	17326.6	25993.5	36200.3	58939.3	66862.8	41998.5	49321.4	42616	63431.8	18366.6	22145.9	21191	76067.5
O55102	51948.1	46519.1	28891.5	30393.6	33828.2	21961.1	63740.5	33348.6	45286.2	78497.4	47686.3	37884.2	47645.6	15862	29504.6	41569.5	46547.9	37409.8	38549.2	60968.4	58377	35941.9
O55106	22958.3	19840.8	17454.5	19255.1	11439.7	17063	16267.2	27958.9	29354.8	17693.8	19948.8	17658.6	18523.9	11100	10552.8	16185.1	11192.8	14028.3	15635.3	38951.9	36787.8	13972
O55111	44892.1	47491	53454.7	46974.8	38989.6	40544.3	46393.3	43115.7	53121.8	44432.1	49855	52835	33421.4	40437.3	30615.1	43469.7	34405.7	28455.6	34964.5	50755.6	53283.3	34536.8
O55125	416360	249716	357218	374577	377185	310086	410966	256671	368181	301891	183476	508207	324595	447518	450292	397538	277911	323412	390266	179926	252398	390228
O55126	48788.2	59902.6	54922	34040.2	34113.3	48511	49073.7	44921.2	70209.1	55198.8	64121.8	70138.6	69372	73499.1	47809.2	63144.6	39077.8	55584.6	67647.5	31854.7	60155.7	40494.7
O55127	20413	13376.6	9302.2	7793.81	13109.8	24267.2	10923.6	31577.9	13543.8	44569.9	17751.7	19000.9	9791.12	24816.7	12369.2	28510.9	23545.9	15594.7	15997.7	13499.7	19826.3	18860.8
O55131	38299.1	41408.4	65907.4	65143	59164.6	55310.6	51704.3	56780.8	140380	61587.5	45098.8	73556.1	72769	60077.7	59259.3	58837.6	63565.2	45811.6	44307.4	54227.2	47923.1	75637.7
O55135	69485.7	61665.9	95161.6	84346.5	80978.8	156238	65203.6	87323.1	118447	69139.4	111386	62833.1	87604	94490.8	109755	75120	94717.6	75413.6	68499.4	126629	123554	79805.8
O55137	131549	118447	102715	113310	122864	78783.2	82027.6	83941.1	95950.1	67828.4	124949	68294.2	83095.6	103911	161381	134974	118104	162221	71732.4	173319	98755.9	90052
O55142	136951	121466	246087	280408	314347	189515	102472	182584	81129.1	180700	98030.9	163227	123801	200173	215857	191234	254995	238953	51917.2	174864	86049.6	261262
O55143	33363	50108.4	92911.1	81092	81465.8	58662.1	40535.5	47559.8	115616	49649.5	41866.7	47124.6	41751	89685.5	68480.8	45442.6	79809.5	52475.1	48886.9	43239.7	43571.3	68496.2
O55186	21128.8	14834.9	12427.5	10752.6	12135.3	23988.5	10113.4	20730.3	20061.8	24567.9	21963.2	19775.8	29627.7	5433.77	16009.9	17512.9	10533	10449.3	15239.3	29176.1	35342.3	14226.2
O55201	24671.4	26759.6	25432.1	28546.6	24913.6	25070.1	27851.6	26826.4	47503.7	20141.4	25188.9	21302.8	10062.3	30522.9	17654.8	34002.2	21686.8	20508.8	25882.9	23976.8	30445.6	22042.3
O55222	70693.3	69900.5	58100.4	54297.9	53969	64568.3	89719.7	75483.7	87613.8	96008.5	71784.5	73356.9	83741	59497	94034.9	78409.3	45324.6	51383.7	114658	78283.4	120873	45904.6
O55229	27814.2	25894.4	41424.1	37513	42293.5	44339.2	24065.4	34788.7	39878.5	34328	23317.2	34415.9	17028.3	30473.6	36115	25220.5	40903	33853	13931.2	19538.7	13759.9	31761.7
O55234	50590.2	52788	101060	87922.1	132521	96105.3	52091.8	72381	122929	55988	60522.1	79607.8	61460.2	117919	109278	58853.7	147427	114455	35346.1	82718.3	42638	108680
O55239	68873.8	83088.5	38906.8	42646.6	39058.8	64282.2	60073.8	51817.1	56945.5	57079.9	41301.7	29613.8	89764.8	96110.2	54110.6	78231.3	45822.6	45017.1	68155.1	124329	83340.2	80598.1
O70131	67317.5	97013.2	109789	65604.5	57489.5	40009.3	77141	78497.2	39098.2	47613.2	38975.1	49334.9	64726.3	67723.1	103282	71257.1	86639.5	92576.6	29321	51051.4	44846.5	87621.1
O70133	20055.4	23996.9	34776.9	50674.7	30679.4	23487.9	37722.5	34718.5	46215.5	28837.5	29384.8	34337.9	28186.9	49055.2	34948.9	32187	24987.6	23925	40333	25073.3	18497.1	30313.3
O70145	23356.7	17072.9	20757.9	46481.7	23692.7	11690.6	37266.2	16308.5	25863.6	44118.6	36009	32390.3	24962.3	31081.2	24754.8	29738.9	42533.7	24111.3	13502.9	NA	NA	26241.2
O70152	37086.3	50115.1	94417.2	89408.5	92268.3	102202	50671.6	87598.6	67425.5	94244.2	51217.7	72550.3	53327.1	92305	82129.9	46823	132186	89944.5	19535.2	89492.5	50146.8	119038
O70161	6761.46	10863.1	NA	NA	NA	3024.4	NA	8090.26	10004.7	NA	16491.1	12397	10690.6	NA	14792.4	13213.7	7898.54	NA	8796.58	12288.9	NA	NA
O70165	8502.04	6891.06	8391.38	12576.5	8369.49	45476.2	15425.8	153331	57243.6	5366.96	193206	150350	15719.8	7810.01	206642	189587	7717.57	8264.4	281644	14577.3	20180.9	172401
O70194	96334.5	94307.5	107483	117562	107489	85186.9	82959.5	94243.1	105998	96614.5	61182.1	83603.5	50760.3	99631.7	89396.1	77630	92999.2	78264.3	101416	95629.2	73334.2	104275
O70200	45961.4	20234.7	28933.4	19176.1	24071.5	36575.9	22962	19672.1	35180.2	25569.6	29720.4	30179.2	46066.8	65891.3	8427.27	20596.3	28030.7	15671.5	22679.5	17873.3	59420.4	32404.8
O70251	475430	575746	351274	609064	396953	652646	524281	208625	660992	427696	520662	388374	343426	305621	409631	440589	345059	442326	356063	452394	345976	474855
O70252	54227.3	52584.2	46335.7	56836.1	40533.4	56456.3	62555.7	47786.5	62992.7	69366.8	88437.1	62381.3	77071.5	76241.9	73277.5	91332.5	57365.5	53137.5	95339	99359.2	126116	62275.4
O70274;Q63739	21741.1	22455.3	22847.8	25444.5	20700.7	18674.9	25250.2	30137.4	23910.1	39061	38174.1	25683.5	20425.3	23825.3	40921.1	25172.9	22680.9	22687.6	19798.5	18317.8	19775.8	25255.5
O70303	57347	50633.3	31917.6	19998.6	41118.1	36752	44649.7	38846.7	34332.1	40493.6	26468.5	24594	30361.9	22485.6	27564.7	80529.3	40395.6	46289.3	88024.9	63904.4	92875.2	27233.5
O70305	47156.9	36477.8	34691.6	32346	33346.3	35225.2	30481.8	28972	44398.6	36421	34686.8	23578.5	31527.1	47121.8	37296.9	33548.5	28652.3	26554.7	48571	43845.8	52133.5	29521.8
O70309	6981.19	11559.1	8971.65	11329	7442.61	12579.1	16420.4	12046.8	12026.3	15094.4	18314.7	14682.9	15379.4	13058.2	10997	12365.1	10172.8	15143.6	12302.2	17131.7	22093.5	11626.4
O70310	44604.8	58786.7	74813.3	74380.9	83362.9	62505.7	43125.7	47570.2	66031.8	25365.7	44436.5	54488	34739.3	69046.5	50926.8	43367	74650.8	53586.1	25849.6	44164.7	50424.2	66735.8
O70311	25551.3	20140.9	26989	23677.2	23903.5	21444.8	11419.5	22649.6	47409.4	25618.6	26293.9	29166.4	23979.3	46347.6	15414.4	32638.1	22609.3	29852.2	19219.7	29493.8	22480	21319.9
O70318	29511.5	24906.9	26141.7	25142.5	19776.5	29375.5	30632.9	22851	32367.7	31687.4	25503.2	22152.3	26614.2	24062.1	22111.8	21337.6	23006.4	23907.8	19535.2	25776.5	28777.1	23988.6
O70324	47335.1	67223.2	77606.4	76741.1	99777.4	65191.7	25370.4	43119.7	66632.9	42134.6	40346.4	28830.1	NA	29535.7	67649.6	45673.2	46470.7	48350.3	13647.7	37182.5	16810.5	42513.2
O70325	206683	87934.8	87320.1	75744.2	97149.9	40924.9	193471	190786	183982	177098	267327	103718	78078.7	251295	104449	179430	224397	97488.3	312647	79659.9	166658	156171
O70362	48559.1	43049.1	62919.9	53069.6	56346.4	62164.3	48595	45426.9	49578.8	40466.4	84197.7	75326.5	82409	69293.7	96401.6	80668.3	46079.7	47073.9	28961.6	38190.6	32044.3	41706.5
O70370	33327.5	32378.2	42004.6	57898.1	36740.4	41266.1	50833.9	50778.5	75103.1	69788.8	48983	71503.9	53414.1	94540.4	42862.7	62968.1	59836.7	37953.3	29854.9	30314.4	31078.6	45639.4
O70378	54027.1	60267	56133.3	50627	47483	55056.9	50566.6	47333.8	61226.7	57221.6	58889.7	48279.3	57817	55097.7	56647.5	60714.9	42305.8	39089.7	58891.5	57319.7	64979.2	51795.6
O70400	121578	88104.7	101005	68218.8	99302.3	85267.5	88363.3	149663	96420.8	110627	86373.2	145149	117048	105596	92585.8	112254	87371.4	80899	94148.5	147696	208211	70761.4
O70404	66438.8	32207.3	26974.9	24386.6	25329.4	33693.2	36812.9	45953.4	48919.2	45397.5	42586.2	35429.1	42511.2	55816.8	29608.1	33456.7	44573.7	29784.5	52586.2	50374.2	69740.1	27854.3
O70435	329645	331137	327748	277322	304564	275074	314477	250797	210413	402248	270932	295431	411964	188200	231964	244151	321912	278090	522869	309344	444284	285800
O70439	70167.9	41770.6	22862.9	56900.6	45695.1	17777.9	40151	26511	33435.2	32679.9	34483.5	19180	37353.1	43795.5	62236	39304.9	27087.8	32895.8	27317.4	35480.5	49191.9	35107.9
O70475	158594	144764	110530	127960	114149	168657	137629	211842	328721	148043	189446	167115	270570	300623	134307	144781	155187	154850	172105	112752	188365	137222
O70480	13162.2	14771.8	11796.2	12503.9	9277.48	14755.5	14803	17764.3	35905.4	21959.4	17087.2	12991.8	13557.4	14387.7	NA	11901	12981.9	NA	19653.2	19195.2	28592.2	15232.9
O70492	172222	131138	163412	150263	141281	129383	135776	186801	141264	201844	150580	174995	175692	155282	83861	124029	137424	121000	151029	146503	186455	130134
O70493	108446	88461.7	69660.5	75157	65171.9	71041.8	105584	101797	72971.1	97833.6	109279	81139.7	87558.5	65043.6	58903.7	83579.1	76235.5	72080.6	102878	93597.2	150823	77577.1
O70503	92338.1	96949	108000	114437	105951	85969.4	56678.7	54915.9	104797	64827.1	52527.5	47966.1	33758.8	65139.7	54816.4	54590.1	118125	97443.5	73117.7	86553.7	49229.4	103672
O70551	5369.4	5118.55	2677.85	3321.1	3530.95	1447.97	4247.19	1533.28	5956.95	NA	NA	3200.67	1770.92	6088.39	3211.78	NA	3040.96	3380.54	5365.21	6419.26	6388.13	2370.55
O70566	24854.3	24285.3	20593.8	20414.1	15855.9	18506.4	23990	22406.3	15285.7	27869.9	17129.3	21781.5	23609.1	21882.4	23493.1	30350.1	19619.8	19691.7	26386	19962.2	28300.4	19369.2
O70570	91162.7	54926.6	53279	76001.4	52851	66926.4	96089.5	70888.1	88125.9	89905.3	104381	88773.2	71251	28243	38569.6	32018.9	51228.7	52795.3	69432.3	67971.4	158303	60674.4
O70572	17970.3	20282.5	32895.8	25674	30109.8	29044.6	11858.3	22393.6	19174.3	13719	9365.1	22176.5	10632.6	14978	27357.4	16904.9	28071.8	25345.5	8151.04	15707.7	21045.1	26232.4
O70585	5295.06	10977.2	9330.11	12441.7	13072.9	7654.56	10367.9	6532.67	52312.1	6443.13	7599.31	6988.56	6235.71	28403	12004.6	14533.7	10354.5	9759.41	24512.1	9284.05	8455.7	8365.53
O70589	31471.1	19416.1	31835.7	18992.1	21712.8	25784.3	21280.1	33824.4	33958.5	32352.4	29321.6	27492.5	24048	35206.9	31866.7	32735.4	25364.5	19983.9	32065.3	16906.3	14826.6	25360.9
O70591	304898	233196	163760	162355	157640	246008	246676	244360	218984	294652	284834	236538	253699	181472	138311	212424	201943	200530	375606	469660	702660	182179
O88271	21668.6	32155.9	120080	19060	38002.9	30740.2	22159.7	32816.1	47874.1	48254.6	24939.3	22667.9	43208	129052	19729.2	28339.8	21591.7	33949.2	28170.9	26215.7	52904.6	21794.4
O88291	9977.06	18758.7	16168.4	16515	17087.5	12630.9	15668.6	10987.5	12897.5	22198.1	11385	17852.8	10610.1	13781.5	6655.34	11665.5	11087.4	9271.8	8102.49	16431.6	8770.08	9331.8
O88342	65991.5	83143.1	128792	126953	102923	92987.1	63344.7	93418.6	105598	88852.3	82126.2	122864	69240.6	156970	110359	106980	111598	117951	42151.8	79064.4	66618.4	138328
O88343	37583.3	31824.9	32727.4	39027.2	30756.3	35281.3	42745.5	27689.3	34251.8	31216.9	36151	31717.5	20476.1	22060.4	31093.2	26530.5	29297.3	28704.6	38514	28167.9	35698	35100.3
O88351	28796.5	29271.3	22032.3	30320.5	24350.4	20202.7	24184.4	26662.9	26979.4	34999.2	27298.9	23550.3	33263.2	25272.2	20963.4	28507.3	18170.3	21541.6	42877	28449	35372.8	27191.6
O88384	47555.8	57693.6	65190	40171.5	48375.3	37971.5	75292.2	44522.4	45636.7	65348.1	31870.6	46442.5	79582.1	42866.1	43232	46578.3	66033.3	31101.8	70371.7	87449.5	106244	43766.2
O88425	31750.1	40337.3	31412.3	38443.4	35274.8	31568.5	31634.9	23292.3	32143.9	32044.8	53286.6	38164.8	37388.5	69600.5	39755.7	76881.6	38865.4	39377.6	46368.4	42311.4	41421.5	37632.6
O88428	87258.8	100892	129375	153788	129758	111490	129736	138441	211938	111172	66660.1	88457.1	105835	106217	97004.5	82801.9	167455	155799	68575	120081	104741	153490
O88441	66852.4	48286.3	47594	28200.2	32424	65977.8	53078.2	44527.1	63691.6	42566.7	63998.2	55588.8	78861.2	47247.2	39367.5	60311.1	27764.7	37693.2	64665.4	54306.6	96137.6	39538.7
O88447	9941.9	12562.5	12513.1	15416.4	7293.91	11069.2	14501	10538.5	28635.8	12986.9	11846.3	6598.33	12892.1	7702.67	7527.54	11399.5	10685.1	9443.78	13962.1	16124.7	30195.1	9584.3
O88448	20939.1	35165.6	32258.3	25050.2	22594.9	19231.8	39079.5	21460.9	NA	30721.9	34336.7	27434.2	23900.1	37621.1	30710.3	44831.2	32160.7	12313.1	18566.8	21003.3	38903.2	37012.3
O88451	42076	77198.3	164449	175204	177253	177882	82684	97596.9	189455	100646	59538.3	138622	90549.1	237679	80090.3	108450	236011	199535	109267	180809	67741.3	130207
O88455	36336.1	53221.1	99279.2	87931.3	82598.7	128350	34543.3	70992.2	188575	76902.1	49391.5	80018.5	65781.6	93925.1	74335.5	60459.9	199621	161415	30857.3	130189	49267	168415
O88456	117675	80976	86951.4	64764.4	61259.3	97637.5	80575.9	82065.1	242713	53682.2	49271.1	75577.3	114000	85350.5	98258.2	90403.9	75460.2	71603.4	103882	61309.6	135812	79174
O88487	32459.8	37414.7	45494.4	65250.1	49400.4	30677.5	42780.7	33566.3	60112.6	30576.3	25633.7	33777.8	29682.8	38401.1	39177.3	36395.3	44862.8	46121	23631.5	32652.4	34695.9	47385.3
O88520	32889.1	47858.9	43809	48606.9	44041.5	41521.6	48128.2	42759.2	39298.2	35961.1	42272.3	44056.9	70894.9	47504.2	53283.3	52915.2	41552.1	41414.2	42164.5	35593.3	27224	48312.2
O88522	29075.8	19981.1	21758.1	17111.2	19583.5	13236.6	24940.5	22392.9	29747.3	11845.5	29521.9	14643.8	27414.2	23179.7	12894.3	19370	21024.9	14492.7	29133.6	44705.1	42833.7	23370.2
O88531	155617	90653.8	105083	143779	151712	133399	127838	101747	111574	125118	119519	134190	113767	86877	129511	173275	118699	87856.4	90563.5	91552.9	121847	101373
O88532	47377.8	6017.25	5758.04	9467.44	7255.14	5468.07	6707.08	22653.2	21514.1	18187.9	6567.73	1990.67	20830.7	12908.3	3314.75	12395.6	32646.5	7054.33	8478.06	15476.1	15982.1	8681.84
O88533	52492	100115	99512.6	111699	89813.1	54407.4	69624.6	91823.6	45763.7	39897	28872.6	48790.5	52179.7	74787.8	69065.9	65249.5	60498.9	88506.3	27433.4	19587.9	99510.6	68424.9
O88543	74907.6	82627.6	94165.5	87404	93021.9	83089.1	68851.9	98700.9	97123.9	79695.4	55694.7	78155.6	62251.9	82186.4	91316.5	79057.7	85314.4	94683.4	55553.5	81801.7	71096.7	73381.9
O88544	86293.9	76909.9	61326.2	64762.8	59603.3	59002.4	76406.3	61386.4	63097.2	69101	76563.5	59808.6	91774.5	51175.6	74664.1	63110.5	57176.1	66878.3	85526.9	82462.5	99191.1	67572.7
O88545	22838.9	21497.3	29906.7	28823.1	25576	22720.6	24342.7	25998.5	28204.5	27605.2	19909.5	21078.4	18540.6	23851.8	20604	19988.8	19784.7	24679.6	34613.5	11070.6	18063.3	31093.9
O88569	218299	227581	199168	310841	287607	250857	331803	199575	326801	231044	207660	299352	272096	173943	154771	304506	167151	169486	223445	193651	320208	167184
O88587	121999	124305	112289	116306	145961	134106	105260	104564	111303	145622	77141.6	75219.6	80909	81047.1	68740.6	100855	94760.1	106171	123942	88918.2	90905.5	91032.5
O88597	4039.9	6012.26	4401.94	4454.02	3141.71	5055.44	5426.23	3477.91	NA	4795.08	6210.65	2840.22	7962.23	3728.8	3640.27	4639.24	3741.24	5889.51	4780.87	6770.61	7830.94	5431.76
O88630	35217.6	26195.8	24096.7	17633	22599.9	30070.4	33130.6	28738.2	22446.8	20452	29323.6	23952	21718.4	13945.6	14341.9	25251.3	26540.6	24405.2	51017.4	55915.2	73402.3	26999.4
O88653	22829.7	26836.7	34849.9	34020.1	38402	35231.5	31540.6	29579.4	37369	27165.7	28325.9	29821.6	21353.9	40969.9	21270.3	34622.6	42401.7	31304.8	21092.4	31159.7	26667.6	35206.8
O88668	231055	98564.6	333123	113176	114594	166135	113917	251770	291264	265857	221227	383156	410433	355935	174450	144062	96136	389827	330571	99029.9	458863	97004.5
O88676	11370530	8.2106e+06	11263218	4099486	7718088	10803286	10379917	10898820	2.27177e+06	6448077	9481925	8.05636e+06	47580840	16002603	1.59686e+06	4.08464e+06	8015893	3.15106e+06	9804097	12273856	14776472	4649013
O88685	457378	373350	261676	249920	302124	331573	332843	338256	219764	424011	370819	331936	343957	232338	231200	261862	299135	285445	561664	614659	719035	320439
O88696	95681.5	86940.1	79300.3	79117.4	83493.4	67148.4	74325.1	66355.5	62437.2	65843.1	66108.6	65527.4	109624	126552	83169.4	115429	53156.7	64395.9	78836.9	136744	139982	74821.2
O88712	26081.3	27975.7	31488.1	31531.7	31703.4	22843.3	32764.2	24884	23701.4	24335.4	23507	25062.8	31629.1	27773.9	59419.5	30223.1	26416.4	28553.4	15714.6	25047.5	19306	26708.1
O88735	9674.15	6167.25	NA	1182.64	1443.77	14010.4	1039.82	6028.31	NA	2076.53	NA	6540.18	NA	11984.3	8658.03	16133.1	7971.21	5077.25	26261.7	10310.5	15408.8	4552.45
O88736	84031	122899	175029	140457	180860	153492	69558.5	89307.6	193806	110608	133359	123884	135156	196096	154993	129608	205605	193330	122229	202794	117636	262537
O88738	12498.4	7496.95	10604.9	9196.5	10949.8	11514.3	8125.92	12709.1	12631.1	14689.9	10451.4	12042.5	11519	9457.79	6062.65	7640.24	13668.4	16401.4	10054.7	13874.2	18130.1	18112.7
O88746	68302.9	66554	46491	64999.4	46273.4	50557.1	68955.4	66104.5	50598.6	68089	78603.3	67595.1	80799.7	63950.5	61667.2	63691.2	50051	56813.2	110996	148441	155213	63059.1
O88783	21669.6	11405.3	14000.8	17327.6	11732.1	12058.8	19613.6	12190.8	31774	16976.1	26821	14805.3	9993.17	31040.9	16616.3	38167.3	11272.2	11324.4	18251	15424.7	24680.2	13508.8
O88792	75827.7	69912	63069.9	105692	62127.3	74874.7	76867.9	70317.2	67602.5	52883.7	77598.1	66508.8	47678.7	84711	129113	101328	60339.8	59304.6	57162.4	59596.3	67476.5	89829.2
O88811	49671.6	31194.5	25580.3	22168.1	20510.9	28975.6	28393.9	35655.8	38482.7	49392.9	29637.7	26869.9	28741.8	27900.6	29607.6	20722	48142.5	43335.2	41599.9	50897.3	90038.5	30517.2
O88822	50032.2	67823.7	139015	107047	126917	187617	48694.5	105077	53022.2	109060	44532.2	89711.3	69833.9	79875.3	85291.4	45492.9	267864	223880	43394.3	171658	83215.9	157087
O88829	21929.8	24628.2	23811.6	20133.9	20826.3	15280.2	34092	33152.8	38784.1	12679.2	46769.9	39498.7	31259.5	31325.7	31610.6	46936.3	22483.6	33208.4	42212.6	28558.9	54982.3	22842.6
O88833	69056.4	45359.8	49715.3	31779.8	57554.6	29038.6	47556.5	34700.3	62506.9	31038.1	40137.6	60027.7	56886.3	107500	81505.6	55526.2	64141.4	66233.3	41854.3	39233.8	45328.7	53553.2
O88843	21722.4	35661.2	22993.2	37061.5	26757.5	18182	35256	18469.6	21864.4	17108.6	25975	21911.1	29637.2	22381.9	28211.2	26126.7	21100.4	32784.8	20417.9	13194.3	22948.2	30172.9
O88844	783664	425263	275620	263108	303552	604809	420953	507076	1.00112e+06	832692	462123	502817	978333	286570	621954	923088	349823	354155	756142	668159	1.19259e+06	310407
O88851	120224	169697	213756	225865	207136	173335	161178	155660	92822.3	68467.4	103893	143280	125495	166472	205191	173909	171059	167610	25711.5	115413	66033.8	142802
O88876	59169.6	59690	63077.7	64740.9	53287.4	51012.3	74115.3	54169.6	67384	60776.6	36890.7	43813.2	57579.7	37333.2	43385.3	48339.3	48990.8	46543.3	53574.6	34091.7	45118.2	58669.1
O88908	34200.5	53295.5	103934	68492.1	81652.9	85634.2	67860.4	74414.4	68307.9	67237	94035.4	85761.4	60278.9	124545	149473	116979	100928	54078.6	43003.5	59380.5	70133.7	86907.6
O88947	74287.3	61482.5	62115.5	47325.6	40921.4	67064.2	59250.8	64695.8	75589.5	51992.9	74738.3	41365.1	81116.1	38913.1	48670.5	87989.5	57632.9	83425.8	91281.8	127013	104602	91875.3
O88952	115467	89431.1	71668.1	87941	78299.4	79356.3	96351.1	88139.4	74206.4	87994.4	59827.9	86836.6	97068.8	97766.9	92952.2	154563	65725.5	73432.2	107492	128393	143449	78897.5
O88958	34209.5	34266.1	54344.5	56616.3	43122.5	63855.4	31212.5	50645.3	59412.9	50462.4	11679.3	25825.4	23702.3	24773.5	24535	18384.6	46157.2	41215.6	133097	39032.9	34110.8	28803.6
O88962	44599.9	63156.5	54724.2	62711.5	78292	37846.9	8967.23	40705.4	81731.7	19965.7	30035.8	30481.1	50959.6	30812.9	19610.6	25226.5	62628.9	73210.9	8833.4	43250.5	18915.7	93983.1
O88967	60203.3	56427.4	41849.1	44629.5	46888.2	45084.5	53069.6	49458.8	52119.2	50144.3	60338.8	48595.7	60253.6	45128.9	45383.7	55039.9	49370.4	43710.1	71316.1	48528.6	50220.9	50783
O88968	87837.9	105743	128920	115519	116654	78893	101329	132993	139771	93870.6	144656	67349.5	57465.6	96349.6	65137.4	61866.9	101644	77619.1	NA	87938.5	NA	109117
O88974	4925.83	11838	15381.4	13874.4	7931.18	7809.5	13639.8	12935.5	1294.06	12700.9	NA	12521.7	1911.44	8057.88	10579.2	12781.1	12704.5	11420.7	7039.26	14725.9	10829.4	8351.47
O88983	89946.4	80185.6	52954.9	63931.6	56701.7	65276.1	73644.5	76634.2	59810.7	93259.7	70783.5	70652.3	82348.4	68438.4	47311.8	62749	71458.9	58867.4	92095.3	124047	155660	57725.1
O88986	80355.1	101663	81574.6	75525.7	66187.1	71234.4	101630	89302.5	122241	100212	96217.3	82104	147451	92224.5	102504	113335	108256	104622	136002	70949.1	157305	94257.6
O89001	19678	20476.3	10519.5	13183.8	12830.9	20363.8	9348.97	13556.4	10578.6	19142.9	16543.7	17380.5	19856.3	18483	7489.96	22846.9	11556.5	12910.3	27211.2	10180.7	18310.1	11598.9
O89017	254869	266215	307050	508154	305572	228134	361604	407262	167797	409186	312491	335873	233292	284219	347183	374604	388556	253255	232426	340765	317394	334892
O89020	47405.3	32105.6	30293.7	21246.4	34308.4	38956.8	49085.4	37011.9	46631.2	36364.8	39715.8	41179.5	73378.3	37995.5	41331.3	51095.3	24401.2	24696.1	27947.6	49564.7	87272.1	27890.5
O89023	197821	125365	102200	96665	118649	145225	124183	118706	163768	163001	229294	206355	174815	157242	151148	191692	105903	108847	152690	152758	290981	128143
O89026	123022	113949	102852	95049.8	83037.3	257446	119252	259861	189189	319655	272827	126636	60262.1	125775	78756.9	156242	113051	121054	203552	221297	598379	132214
O89032	24448.7	3047.15	1845.35	2494.95	3742.01	19477.8	4026.52	13830.3	23879.7	14213.5	NA	17509.3	NA	NA	NA	1092.59	9525.47	2199.72	22819.3	9470.01	20895.1	8393.34
O89050	439.124	2146.94	2619.95	3367.89	3542.25	2220.28	2182.18	1419.7	NA	2063.12	NA	1923.94	NA	1755.05	2702.19	2643.05	4411.06	5428.96	NA	3667.2	NA	2422.75
O89051	97419.5	34105.7	30036.8	27855.2	28499.6	47880.1	35843.4	48993.7	27433.6	62012.2	53726.1	55289.6	29220.7	45510.1	22759.4	38645.9	34503.6	22084.1	46567.9	48871.9	88054.8	35222.8
O89053	37241.3	2808.54	10569.5	11931	4861.45	6516.35	5424.89	5521.96	75893.7	2447.66	8736.62	3762.41	2343.34	25901.5	7137.88	13475.8	15443.7	4545.37	11055.7	4548.65	7841.84	10646.1
O89079	69832	82335.8	107975	110171	84283.5	57355.9	52867.6	65462.6	90955.3	60024.6	53023.7	68635.1	68407.4	72894.3	78246.6	77345.5	76638.1	67719.6	70533	56482.8	49346.8	82350.4
O89086	38543.9	32658.3	34132.5	35498.6	30772.7	39316.7	30375	32005.3	44136.4	52029.8	133150	84412.2	84301	146443	85964.7	215902	52697.1	43517.3	121775	90443.4	85795.2	37535.7
O89090	17423.9	10078.4	5929.21	12647.5	8506.24	7010.65	16041.8	7068.32	14754.3	5104	11376.8	10893.1	7198.02	15286.6	9351.62	9544.65	10388.8	11064.2	8378.48	10214.7	13628.2	9035.85
O89106	60635	76887.6	63352.2	82153.3	88288.2	84385.5	46703.4	71733.3	140351	55809.7	59681.9	49767.9	59933.5	90102.9	62272.5	92426.8	76470.3	73638.6	49089.9	73067.8	39683.9	60793
O89110	57645.2	35493	45231.7	46332.9	33225.8	46489	61039.5	61893.4	68667.1	40984	61853.6	37073.3	38839.4	19512.1	26720.5	23514.5	38506.3	38328.6	59251.8	63723.3	69783.3	36558.6
O89112	61597.9	84787.5	81656.5	106728	96515.6	91717	85105.9	78195.4	84357.1	65007	23125.9	67984.8	7053.06	71204.3	13206.5	51342.8	93647.2	98066.9	18590.4	75887.1	20959.8	30936.2
O89116	18113.1	30221.2	20773.5	21010.8	16532	24320.1	30876.5	10149.9	8637.17	22893.8	12000.4	29785.4	13982.1	21208.2	13451.6	18033	7175.5	19656.6	14588.9	20059.7	27835.6	15656.4
P00184	277515	424657	550800	606478	761603	444113	351000	246869	231295	185330	82025.1	143603	161748	48719	282125	85560.4	361468	533305	142833	286131	152015	303761
P00186	74909.5	75199.9	144028	94482	186769	124925	80163.4	73327.1	44536.6	68801	85216.4	62770.4	49859.1	69561.6	82416.6	68650.6	111658	102985	40842.6	66823.1	47672.4	96778.2
P00329	1435741	1.07525e+06	1.68944e+06	1.15073e+06	1.09135e+06	1.49227e+06	576144	1250080	2714633	1.26543e+06	737116	1.23392e+06	1.30555e+06	1.44871e+06	1391749	1.65048e+06	1.4361e+06	902144	655455	954662	913096	1.34545e+06
P00375	488493	270362	253053	241542	200450	294762	232981	252668	109131	416979	195375	314461	290750	258491	190645	105524	211281	237191	271175	240423	421735	333861
P00397	20308.9	16853.6	30347.8	25096.7	29141.4	30982	15016.5	28507.3	18412.8	19491.2	27359.2	20819.9	11278.2	55321.1	54971	47227.7	26705.5	24933	NA	20226.6	13830.6	25427.2
P00405	181626	252453	213813	181874	194835	245514	199106	288344	324915	268927	294755	312750	363368	312487	231170	301554	301085	202775	217714	199756	326344	180202
P00493	185348	149374	85573.6	142195	122167	120482	120498	133619	116563	187486	199136	139390	155992	131195	103838	189180	119680	135109	234628	239358	291920	127816
P00687	11087.1	9110.81	6315.39	14256.3	17873.8	11920.2	11830.2	19801.8	10220.5	14136.4	46549.6	38614.9	50102.8	30709.7	30994.7	53092.9	17933.8	10950.8	20937.5	25663.4	16949.7	5193.85
P00688	53810.7	3335.33	17596.6	53137.3	30485.2	23411.5	63579.5	47950	10889.3	1649.24	16949.4	32191.9	14405.1	34917.4	34739	41419.3	37450.9	4377.02	61491.9	29059.1	11206	8406.94
P00920	104432	103229	160383	167868	145411	133196	126670	100219	112590	95465.1	82663.9	70990.1	309294	148139	265030	110796	120195	109577	72629.3	110862	87187.6	60009.6
P01027	56862.3	57059.4	101919	85198.2	81047.1	88872.5	53161.1	64123.6	88872	50564.3	51266.3	67682.8	68899.4	98162.1	96025.8	67917.5	93336.9	71207.2	41523	43990.4	62351.2	93436.6
P01029	30268.7	25322.8	47235.2	63566.3	45352.4	38478.4	27966.2	34851.2	43089.6	35835.5	19763.3	25503.4	31280.7	23192.5	41304.5	20086.6	57476.5	49962	21605.8	33626.9	29075.2	55893.7
P01587	410725	344375	574129	530814	466402	405898	623559	599074	NA	572996	296597	480675	310246	459132	646285	361250	603397	343552	442122	385431	471752	656187
P01592	19782	34958.4	31241.4	77822.6	38644.7	27532.2	76352.2	81288.5	69429.3	100330	196016	30313.8	122189	94074.7	77939.4	79736.1	45894.1	48421	55942.9	90614.3	81001.1	40012.6
P01631	22168.9	19999.6	20954.8	22553.4	25607.9	34161.5	126131	56900.4	32271.7	148922	25527.2	35266.9	152309	75656.5	37460.9	37596.8	30713.3	27629.6	17905.1	32678	38860.2	10314.6
P01633	23882.8	32952.9	25520.4	44678	29606.2	48204.5	122235	40891.6	NA	71584.3	21426	80919	99107.8	88023	46556.8	74551.4	37463.7	35868.7	10091	28696.3	27957.6	45618.2
P01635	6193.68	13111.5	10048.3	53720.6	13738.4	18182.1	80740	10698.3	176899	116606	52645.7	26954	120364	17137	43834.9	24301.9	17340.4	14281.3	5675.25	24832.4	30306.7	11288.3
P01636	16846.8	21458.9	12849.5	29688.2	8575.07	26440.9	59228.4	32347.3	22511.1	53478.4	128776	43628.4	75927.6	42800.4	22742.7	46195.9	21137.1	8100.71	15024.3	32255.3	13441.3	26376.1
P01639	12436.6	23365.4	23041.4	48130.6	35290.7	8552.15	22748.5	16235.4	14071.3	29538.2	6367.41	65092.3	55307	41930.3	47909.5	22991.1	56046.1	8869.5	9401.72	35035.9	NA	11416.1
P01642	9760.71	54505.5	NA	33320.6	2983.55	2648.77	99802.2	21604.8	37212.2	83816.2	10384.4	162300	118415	36846.6	20991.9	20880	13288.8	1	2310.81	41627.8	2554.98	16019.7
P01660	1.05129	29100	12181.1	20814.6	NA	8531.86	94202.7	13285.5	NA	31381.6	44330.2	117072	432068	89952.4	268720	190851	203570	64950	34050.3	12476	70426.3	9991.73
P01734	142455	77399.2	36376.7	65356.3	41208.1	60260.2	94259.4	73712.6	NA	187512	108760	144194	120699	109534	69788.6	76545.1	19336.3	43566.9	70646.5	55276.3	135404	36096
P01831	24161	14921.6	52602.3	18002.4	21806.5	10155.3	17437.1	12126.5	37860.3	28028.8	17758.2	19130.7	24513.3	17042.8	18065	16989.1	8174.27	7542.25	NA	NA	23970.7	8848.82
P01837	296927	48196.4	65617.4	22563.1	203778	505137	45570.3	244710	374317	115396	55908.7	190962	697448	384581	230288	295555	91932.7	155047	796174	74658	43874.8	338879
P01843	3556.18	9280.2	15625.3	15025.3	12213.6	17763.3	33345.8	9288.67	153085	4883.78	16630.3	25799.3	28776.2	67084.4	22320.6	52223.7	16049.5	14766.1	NA	11398.2	8826.05	11086.9
P01844	1676.26	14052.6	12797.3	22005.4	NA	9020.36	7173.63	NA	5768.57	9378.11	5219.5	NA	12119.4	39928.3	37605.4	35083.2	28313.6	16460.1	NA	39907.9	NA	11227
P01864	62366.3	21261.7	7920.73	44359.9	16809.9	30773.7	81238.4	91913.5	227708	56966.7	130915	48586.4	112195	160022	331163	112128	63959.2	85097.5	41204.7	26129.8	20668.2	41516.6
P01867	62085.5	34920.1	52106.2	100874	53444.7	40420.4	294765	267599	88840.4	447708	111562	203351	249106	386754	261460	337010	150760	72460.7	45189	114760	113674	46229.8
P01868;P01869	26640.5	32476	65539.8	39983.6	61423.4	46152.4	53149.6	20357.7	38641.1	23201.7	18808.7	40009.3	30580.1	69122.4	75634.1	62226.1	41041.9	45564.7	11389.1	16340.2	14968.5	24873.5
P01872	92986.1	106702	78781.5	53993.7	71976.5	61882.9	254671	422195	558213	272917	182188	188793	384538	277361	332226	231051	325780	248349	81488.1	139073	223261	167122
P01878	38475	40763.9	77265.8	59368.1	105177	134989	65566.2	73446.7	60943.7	121850	36182.1	41974	144237	229111	79119	91446.9	89603.2	55377.1	74096.9	117762	126766	54251.8
P01887	322856	128728	178323	207162	201869	286510	281588	257346	498997	349283	211071	140775	227979	133155	215848	119466	138213	221434	193275	184489	322757	222167
P01898	63226	50430.4	69209.1	55249.8	54003.1	81563.1	49490.2	74051.5	43178.6	64493.7	56325.1	70096.6	96707.2	54805.8	71931.6	53977.5	81172.3	60225.8	128025	88122.5	116929	77304.8
P01899	158640	122842	85138.7	80792.7	170329	74805	117565	95485.9	96208.9	127964	108026	64962.6	125184	80468	90990.7	67101	73107.3	51161.2	68016	102034	163352	100520
P01901	248532	65979.9	121060	82035.1	56672.4	102169	70464.7	107842	54908.9	198945	232829	136206	113039	149444	59305.8	181568	125065	125878	212629	124375	228893	57274.7
P01942	100725	85759.4	138796	114814	99122.1	105050	141687	123733	136729	51261.3	146235	101497	473251	141903	306473	126736	95996.7	29069.4	101806	114475	114556	45481.1
P02088	202203	52428.8	59920.5	222700	63200.3	214699	105258	74400	153172	108533	70597.4	226680	561134	128283	388960	131971	43615.9	126823	76673.4	49066	66930.6	182683
P02089	140552	86551.7	128049	83760	117806	138056	153875	170108	163842	90896.8	137681	136854	1127769	239121	475655	187195	101868	42198.2	70046.5	153970	177717	46902.7
P02468	14165.5	13969.1	18888.2	12359.7	21322.5	13826.6	27357.6	4098.04	26417.3	16127	15132.8	15056.7	13861.9	12700.3	9311.3	9570.06	16865.4	10675.3	6657.98	10108.8	7635.41	10733.6
P02469	5030.4	6593.78	7325.26	6548.22	4302.93	6443.77	8263.63	7305.94	5212.34	8157.92	3315.08	4346.98	4499.92	2837.77	9085.64	5736.21	7419.02	6302.49	6050.69	7479.79	9679.92	8926.64
P03888	29960.8	29994.9	73118.8	60586	68766.7	69069.3	26945.6	43671.5	51484.3	61884.3	29539.4	50215.7	33695.9	100589	76737.5	49414.8	60474.6	61459.5	46339.3	52500.8	32486.6	70038.5
P03893	8637.29	9472.25	14350.1	23424.8	8992.91	15569.2	5974.07	NA	12673.3	5186.15	12096.9	9316.73	4397.01	31996	26076.8	15361.9	7575.33	15576.2	5996.01	15564	7872.74	21074
P03899	14271.2	29000	43968.2	43421.7	45713.3	35408.5	23321.7	30217.8	63838.3	25293.7	26949.9	25173.5	21240.3	69149.2	65955.9	65177.6	47640.7	43348.4	6861.69	37475.6	15864.7	43015.6
P03911	13281.7	16440.1	41679.8	35529.2	26609	36172.8	12458.6	20293.6	19666	13280.1	13750.9	17213.2	30209.4	29371.7	47808.9	17891.4	26490.6	15230.3	6697.75	26508.4	12985.7	27818.8
P03921	16044.3	32062.5	32313.5	21780.8	36624.2	30356.4	17753.1	12603.4	51089.3	15300.7	31447	22318	21134.8	26848.1	29535	24759.5	45028	27493.3	8664.82	21025	20320.2	34919.5
P03930	1.56601e+06	1758295	1900370	2.14375e+06	2.02199e+06	1.8732e+06	1.78954e+06	1.69174e+06	2.19456e+06	1.82595e+06	1.92397e+06	1.80387e+06	1.90523e+06	2.53111e+06	2.42321e+06	2.21935e+06	2.04561e+06	1933086	1.13583e+06	1.76741e+06	2.15316e+06	1.73845e+06
P03953	62298.8	64488.5	48630	40969.6	66221.2	55742.5	87819.1	46580.3	28069	22302.6	71025.4	28703	127189	104359	109729	117509	26882.2	22795.4	38800.7	62055	101323	25537.8
P03958	71581.3	61355.2	42193.3	53038.8	45766.5	46968.4	76283.9	60557.8	61253.4	48764.4	90908.3	62408.6	63864.4	37612.2	52700.5	31131	40056.8	38659.8	81996.2	75774.7	91395.3	34428.3
P03987	33066.7	35402.7	33011.5	39771.8	32928.1	40519.1	65480.3	42461.6	43849.3	7566.4	33680.6	285916	127937	57067.6	59472.5	33409	23188.8	44119.3	19882.5	20280.2	33042.6	41145.8
P04117	128024	79449.2	104852	80610.8	83400.4	57230.7	57934.5	65769.3	81473.1	59876.3	79533.6	53582.9	121980	205753	110368	318075	60160.2	130651	56313.7	48644.9	77077	64437.7
P04186	32745.5	33070.2	50392.3	37989.8	69165.8	43888.3	42882.1	57138.9	19812.8	48131.8	28169.8	43192.3	37884.7	47934.4	63215.7	38656	56193.1	49422.2	35255.8	51120.6	45220.7	37340.9
P04441	29608.9	19830.4	18320.7	53237.5	29559.8	30872.2	33763.6	14313.1	36193.9	31561	16659.9	9766.06	NA	15934.8	20228.1	19646.5	8127.21	12022.9	14688.4	13859.9	38416.7	14406.1
P04627	37254.2	40036.3	70404.8	64867.9	66713.1	32908.6	41733	44536.8	47994.4	1451842	41174	1.57272e+06	19531.2	50378.2	62519.9	35319.2	50960.6	41571	736113	39987.7	773030	65941.1
P04919	35576.9	37442.7	19390.1	35858.5	27043.3	49997.6	51121.8	27054.7	191401	38065.5	41873.9	47815.4	109711	52241.9	72711.3	23567	47618.8	34631.8	58110.8	39567.4	62097.6	44554.4
P04939	94680.3	54582.7	74339.7	73084.6	108043	66522.1	25796	26188.4	24079.8	21615.3	50521.2	64127.7	14483.8	NA	57532.5	56402	33591.9	31082.8	23922.2	39371.1	47405.2	31167.7
P05063	51044	42119.7	43840.4	31416.4	34275.2	36048	32265.4	30603.7	33368.9	28395.4	69187.8	59842.5	69152.2	63907	65035.6	70768.5	40063.1	48869.6	85843	68186.3	65008.3	54414.1
P05064	125550	91781.9	69979.2	87814.9	63181.2	81259.5	109032	97771.9	117360	156485	154406	183594	162727	149666	111238	187893	109454	83779.9	213794	169404	164804	156140
P05201	449765	482598	332018	319813	353838	613461	413009	500788	409242	484637	420528	374499	587989	929474	438936	852066	274242	368517	397760	276738	561943	287181
P05202	269481	247292	171139	296431	248691	318213	259283	340776	331824	336693	303139	353189	404436	302422	331468	318160	262622	264961	359754	280652	329338	212040
P05366	34417.7	NA	NA	NA	5536.42	NA	143262	NA	NA	NA	NA	110702	NA	NA	NA	17838.7	70751.2	134807	196137	NA	141669	11595.5
P05367	72764.8	NA	25158.1	10715.5	28288.1	47443.8	27399.9	7418.98	27485.6	6455.78	54867.7	15656.5	18975.1	NA	9285.87	NA	30237.4	4402.57	240734	18770.5	49152	12385.5
P06151	569080	302468	457482	512679	476314	488118	368236	298468	710432	489948	156159	557856	325497	619285	564784	562958	807580	489330	279643	331799	398756	503373
P06339	50521.9	42179.9	36561.9	54883.9	42381.2	34625.8	47834	28537.8	58884.3	33756.7	47811.4	39580.1	26726.2	37217.7	23361.3	19245.7	35486.7	35327.2	25639.2	37935.8	65031	45022.3
P06537	23179.5	32236.5	24765.5	11861.7	46294.2	33695.6	38333.7	34283	50246.3	40719.5	30455.9	57438.7	32574.3	23433.7	32823.6	22190.8	30317.8	25946.8	54119.4	39619	114549	23652.5
P06683	36906.2	20724.9	26994.4	26022.3	28546.3	27201.9	48581.7	32716.3	16484	19168.1	21084.7	8384.66	42439.7	33039.1	26313.3	14188	25383.4	33140.7	27043.5	26762.5	37024.3	24959.6
P06684	7653.87	13124.9	16040.1	22029.1	17766.3	14633.8	11568.2	14183.5	16066.3	12772	10720.2	12781.8	16296.1	24924.4	29864.6	25905.8	24337.9	15171.7	7973.77	13089.1	6015.07	21832.3
P06728	54521.4	67281.2	66231.3	52351.1	39715.9	41215.1	72918.3	67679.2	81177.5	63644.6	113376	47382.5	130295	98761.2	172350	188470	70519.2	46915.2	108400	118873	148840	68314.6
P06745	100640	66719.3	134014	120951	123333	135659	96034.8	151111	248729	171321	110395	162534	120352	192661	141964	153409	112785	132911	130117	104745	113637	157891
P06797	68330.9	64627.2	43814.1	105012	48661.2	59298.1	46729.6	45840.1	54982.7	69323.4	87085.9	79158.9	67165.7	85711.5	48002.5	94646.2	56877.9	40611.1	57170.3	68745.2	72364.2	61552.5
P06800	12636.6	10983.3	20007.1	41568.9	19011.4	16580.8	23200.3	15694.8	33163.2	30956.9	11923.1	31874.7	31747.5	32278.1	30577.2	20845.5	43986	15122.2	7701.28	20264	67529.9	19989.9
P06801	107364	85354.3	223648	147133	160008	225138	91993.4	231785	215315	156627	65391.6	101859	102554	66594.6	91398.1	65110	237772	220087	107126	181029	122225	207647
P06802	52879.1	43467.4	43825.4	49385.4	43333.9	58273.8	70800.8	67687.3	65563.8	66415	55572.8	71795.5	82272.9	60666.4	57399.1	72938.3	51220.4	52577.8	60914.3	63069	75941.8	44247.4
P06804	88618.6	78403.4	105549	70213.5	78979.3	87270.9	73222.2	95229.2	110642	147783	132643	137102	110841	79311.6	82320.6	118093	65831.4	69262.7	99985.4	115221	147604	72007.5
P06909	61174.8	46654.4	59030.8	66936.1	61862.4	56440	43081.5	73591.1	56337.4	60677.9	43192.1	46822	82461.2	67861.5	73180.7	64437.3	58515.4	48276.1	44898.4	51112.5	49678.6	48156.3
P07091	40464.5	99809.9	84217.5	332402	38476.1	86329.9	145001	88701.8	146165	239643	155912	131344	352676	149008	216562	247473	140246	126341	80238	143740	324834	153177
P07214	22964.3	22192.2	14323.9	16729.8	11718.9	7902.61	17704.2	15227.9	12055.4	24048.5	9631.52	NA	NA	10839.6	6253.98	13937.3	18582.1	16201.7	41109.4	44797.4	42801.8	19885.7
P07309	560824	451740	396348	300728	313096	519679	541728	503027	341413	523151	603086	555604	1.00135e+06	681963	582824	460918	327945	373915	825996	958630	1.43955e+06	350477
P07356	79909	78104	153018	118913	95278.2	101294	88783.1	100594	106196	139392	85790.2	141913	150293	112373	72504.8	94120.3	109577	84961.9	87058.1	63176.2	52274.9	127816
P07361	26075.3	11338.7	18514.1	48668.4	16490.3	14172.7	25000.4	11931.1	22414.1	18400.8	21776.3	33185.5	35050.6	20795	22363.2	19209.6	36874.7	27320.3	49879.4	44002	57538.7	38522.6
P07724	220847	146059	104676	82940.5	168070	206425	243364	149433	804402	161554	170044	181389	389479	376110	350202	492256	130247	148522	222614	171766	203077	142100
P07742	7750.21	8478.96	5451.56	12721	9064.92	6051.22	6902.81	5498.52	5919.38	7503.65	4797.35	4520.98	6465.89	9434.39	5289.31	10898.2	11671	11735.3	10996	7961.68	6479.08	9222.27
P07758	25961.4	46046.4	16689.3	14606.3	18239.1	32910	42222.2	33479.8	26194.2	31783.7	52897.2	43979.5	43466.4	36290.1	26024.6	20564	21659.5	29647	23541.6	35893.8	76279.8	30954
P07759	111977	117161	189364	78017.6	242538	161272	37626.3	96914	132275	105831	82931.5	65005.9	137064	192397	115127	89079.9	53823.2	75701.1	86357.1	64943.2	89857.8	24292.7
P07901	178421	191694	232872	216566	200108	119691	183689	201774	218325	180386	200316	174776	161461	178894	192048	130150	144037	161655	183929	136473	190245	165557
P08003	216451	191791	165566	183655	177221	211632	167861	159625	405219	217963	166298	146799	183037	111647	200785	155308	181311	167924	250715	251815	242537	133583
P08030	79142.3	77108.4	94715.1	89561.9	94327.5	75282.3	91781.4	90840.8	67222.6	79964.8	116711	125723	132510	161854	123032	195334	102331	113233	120252	98203.7	102839	185461
P08032	13787.3	7800.07	7993.37	8453.71	6052.45	6353.57	6292.53	10254.5	18285.3	11031.1	15002.3	11021.6	56706	22038.4	21410.9	15074.8	9416.58	6595	11061.8	16839.7	19018.1	6728.07
P08071	17905.5	6742.21	13228.7	8118.28	5881.27	3587.03	22177	15269.6	56019.9	13527.5	9127.26	28402.7	21035.7	15453.9	27730.7	17032.6	40232.8	11715	18177.4	6821.6	10060.5	24069.8
P08074	22257.2	37316.3	31625.1	33810.2	21750.2	38731.2	32450.1	24511.8	24138.2	25668.1	35625.4	23561.3	36646.6	19643.3	18970.6	13751.2	31066.4	30734.8	24611.3	41557.2	75012.6	30528.9
P08101	126310	69260.8	87500.5	67291.3	96701.4	72091.3	127251	132231	197746	157175	119151	84247.9	122500	105509	85904.6	75701.4	197214	67981.2	94976.4	210284	267449	169342
P08103	5996.92	2874.26	8234.48	12668.4	1523.34	3291.23	9321.44	4423.03	5262.5	5371.77	2976.04	1943.67	4593.91	2998.04	3859.9	3790.01	8495.73	1565.44	2222.05	1825.33	3446.59	10340
P08113	280374	203331	206267	241946	187747	265846	201314	256123	686223	252456	173041	265170	316972	300403	225535	201434	173521	256708	226332	232903	394544	198221
P08207	461513	378138	585715	366792	405455	387810	408384	488059	422391	482864	666887	746869	613743	179653	307218	463356	183248	471949	517625	648256	668508	483185
P08226	274426	137819	150465	105999	93689.3	171495	154654	169093	456482	210631	141485	336444	196960	114618	115606	228035	127031	94423	147067	186743	338168	130915
P08228	293032	167656	122131	66598.5	61944.2	83215.1	158088	121368	982241	81736.2	175992	69922.5	83646.7	58887	140379	155078	74808.2	88758.1	198967	140543	283067	84828
P08249	260024	310274	244302	327423	308348	166765	284178	174687	240707	176035	310386	227682	322772	436755	380366	429291	261560	278053	228637	184920	120792	260668
P08607	31470.2	47408.7	47952.7	55451.2	54758.3	48448.2	34395.3	22932.8	59388.9	31061.4	19556.8	15005.5	23453.9	37215.6	17691.5	46626	29211	37871.9	11475.3	31588	26937.5	37452.6
P08752	32141.9	40590.1	65492.3	61633.7	55867.4	54179	37448	57886.9	213837	70040.7	31737	47107.6	49412.1	62291.9	67159.9	54676.9	63459	51655	24113.2	48767.1	35882.4	56938.6
P08775	2462.8	5201.8	3456.44	12186.6	8454.73	29462.1	12580.6	29923.9	158210	10818.8	7068.33	14158.2	62264.6	15350.6	3728.74	14804.2	8079.07	13363.1	24929.7	37082.9	43255.9	7169.85
P08905	48699.9	33971.3	31884.2	32693.9	29964.7	33903.4	67696.3	64118.4	46784.8	69467.8	38356.1	68723	78154.6	65164.6	42886.2	52743.4	63686.2	33165.3	41298.1	32879.8	97643.8	34362.5
P09041	700638	646336	873037	743046	18886.2	15204.9	26170	45497.7	35003.2	23626	1.29653e+06	12311	8050.37	931433	33469.1	458374	36842.8	35277.2	22334.6	32983.9	247294	18608
P09055	106933	98829.7	69279.9	84889.3	69155.5	59968.7	93344.7	99891.3	200222	93679.4	101685	79935.5	138126	67122.6	69927	118000	62648.2	71386.7	118493	157788	214983	63839.7
P09103	295263	306158	194618	263058	269469	386891	331418	541847	1.29049e+06	401693	314346	357262	791001	314290	511162	495513	307462	477069	547664	717172	886246	255004
P09405	943668	711381	489865	485430	518737	749072	734458	716739	704439	794746	1.10799e+06	792920	895853	727971	554720	930314	547024	558008	1157420	1.42186e+06	1.7298e+06	544325
P09411	1037065	726565	703024	495771	621838	528016	723019	758206	690225	925295	968806	801803	849597	958381	718744	1.08345e+06	754983	537873	1.21835e+06	1.01243e+06	1.29931e+06	546016
P09528	66024.5	52100.1	65070.2	35953.4	36402.6	88866	99162.3	108678	280013	174467	119856	133959	188906	243228	121796	87475.7	62805.2	81413.5	57769.4	70618.1	128478	74999
P09581	23563.6	12021.3	16538	31319.1	17958.1	18245.6	30631.2	7278.71	13898.9	11918.9	27496.6	26388.4	40123.6	18101.3	23686.7	27215.1	19098.7	11166.9	3787.48	16344.4	19183.1	14273.4
P09671	343941	253853	139116	239364	212924	317602	272869	286271	658514	236008	352157	291948	554348	146289	356160	354184	218514	228517	226478	281018	449286	205273
P09813	169651	105459	102630	208649	73923.8	128016	86790.3	73043.9	141322	71948.2	68159.3	141086	162157	342916	92342.5	78976.5	85000.1	240102	171580	78426.7	150149	77339.4
P09925	34309.5	65578.1	114084	95263	103448	79863.8	43980.2	62113.6	111736	48686.4	67258.4	35671.6	24605.4	98830.7	104228	70497.5	105636	89661.3	39839.9	51999.6	30212.7	79251.6
P0C0A3	30375.6	27476.3	18132.5	18907.4	21444.1	21803.1	24825.4	20816.8	25401.2	23322.2	21069.9	23431.2	29265.3	18223.9	12992.9	21728.8	22935.7	25018.8	45725.3	52131.4	48183.6	33737.3
P0C0S6;Q3THW5	6077.92	9661.33	3025.49	47753.3	6576	1873.33	12080.6	3742.61	9080.57	4217.46	5563.08	7870.66	6087.79	6687.54	6237.67	5359.26	2969.65	14235.3	4112.21	7872.4	9816.46	7341.21
P0C7L0	45917.7	32594.1	11999.4	24772.1	30146.7	34957.1	29717.7	32596.6	22891.3	26538.8	NA	39995.1	41496.8	27423	64059.8	25378.2	23049.8	24907.7	31864.9	41940	45050.8	NA
P0C8B4	33224.4	17651.7	16745.5	14181.8	14786.4	43739.2	25940.1	28847.2	4093	42874.6	48137.5	22540.1	42609	26026.3	38543	49102.1	16039.8	8466.91	43037	36551	85142.9	12254.8
P0C8K7	3760.87	10693.1	9507.32	10384.8	5762.97	7586.05	16811.6	4374.18	NA	6909.86	8873.86	6744.26	9109.65	2669.36	9399.9	4950.94	3596.81	7428.37	10349.4	13025.8	9732.36	7154.84
P0DJF2	44742.6	22432.6	27584.4	18868.4	19990.2	22537.8	25416.2	45854.9	43568.1	15990.9	20823.1	35745.4	23903.7	18278.3	18790.4	21416	21809.7	21222.8	20497.9	26947.3	35694.2	16741.2
P0DN34	51585.3	99718.1	199256	192445	202672	121302	73147	99497.3	45691.9	119129	83419.1	66994.9	231630	366646	294681	439486	51861.6	54277	178588	129919	245237	56773.8
P10107	47098.4	33390	47051.3	47846.8	37104	29922.3	67477.1	58697.9	86263.4	69468	89985.1	68066.2	65728.3	71758.5	57441.9	80135.5	69191.9	47998.1	62951.1	46478.8	54365.3	72599
P10126	176777	180326	353660	310119	337105	368002	136906	362248	654555	282566	218205	236753	211657	298804	256663	242709	507664	427961	180801	418927	249611	369569
P10493	12694.5	17677.4	12088.8	11817.6	12098.8	11437.3	13919.7	13463.6	7578.02	16815.3	16436.2	11737	21237.5	13107.9	17395	22103.1	15304.2	13922.6	14386.8	23082.2	25727.8	12477.9
P10518	178005	85141.5	102653	104171	133545	105122	152504	127978	159320	120729	98147.1	150141	135366	73374.1	84338.5	98454.8	101298	74110	228028	105743	153346	130305
P10605	236064	217292	198234	256078	229452	247369	290846	293892	896026	779612	324027	382270	382885	243209	337806	443462	234547	225019	539536	354908	721431	416059
P10630	39590.8	36675.3	47985.5	45185.3	51900.6	46850.7	32571.8	35564.2	39613.2	31578.6	21634	41556.3	24918.3	39331.3	36890	31435.5	51765.3	40846.7	35882.2	44257.2	27386.9	60550.2
P10637	21762.8	18894.6	10750.3	14238.4	11492.2	16891.8	22966	16386.3	37191.6	15989.1	16482.2	14203.6	17454.5	11195.1	24076.3	11648.9	20038.3	17343.5	9227.11	15465.6	22576.5	18358.6
P10639	589020	478174	208669	250071	250596	375336	335065	368109	372899	503456	352090	333148	512331	183051	411643	352314	281931	240732	339545	463879	680418	295863
P10649	159442	141000	122305	162382	176176	245991	251833	302213	737137	239390	362271	452536	268132	275640	336393	267617	210723	249307	381350	449860	426111	280886
P10711	76514	71375.4	50843	51417.5	54083.5	59613.5	77313.2	58176.6	52377	70571.7	76074	57627	72293.5	53391.8	52005.6	56179.7	42534.3	50554.3	92900.5	104068	141565	43303.6
P10810	11304.8	5592.69	4374.9	11194.6	3750.46	16361.1	17392.2	10131	10066.8	21190.6	15874.2	15530.6	31072	14932.1	13926.1	2956.21	5861.1	9227	11413.6	7604.94	29073.2	10369.3
P10833	27136.5	47902	105863	91161.6	84885.7	49064.1	50115.8	38355.7	83640.7	60844.2	50979.6	71642.2	54454.6	98984.7	69893.5	51731.7	96240.3	82496.9	25516.7	26269.9	41029.8	88288.7
P10852	73214.2	74916	46886.7	65375.5	46364.9	63077.7	76527.1	69548.1	66871.4	101625	59980.8	60179.4	68151.3	52841.5	32793.5	60769.1	53523.1	46695.7	58779.9	112243	161868	41573.9
P10853;P10854;Q64475;Q64478;Q64525;Q6ZWY9;Q8CGP1;Q8CGP2	222969	238270	197732	201036	245153	116653	158096	169418	117030	314983	294045	251714	196765	368703	246938	353762	188232	169957	153645	210747	163421	200556
P10922	67693.4	90497	52538.9	82864.2	127906	141964	54741	191684	543415	299419	112636	75684	371383	131380	85253.5	62805.2	48958.8	152315	86923.3	123917	29765	48404.5
P11031	91215.5	76555.6	88908.1	89687.5	73353.3	95778.8	100553	104598	116654	75166.8	71048.2	71252.5	87799.3	95246	94053.4	84746.8	62258.9	63470.5	126075	66569	88976.6	67577
P11103	21132.6	25595.5	27803.9	32441.8	27316.7	22443.6	23116.8	20613.9	23705.2	20394.5	14038.7	23145	17433.9	22331.2	28120.7	24119.4	17813.8	30535	17491.5	15296.7	19154.6	28513.6
P11152	4781.67	12619.8	NA	NA	8914.03	12688.2	NA	NA	NA	1908.65	8482.35	NA	NA	NA	NA	28647.4	7346.01	9810.08	10978.2	21426.3	16169	9614.39
P11247	11043.9	52518.6	10275	19961.3	NA	3493.73	30655.6	23156.7	18215.2	30599.8	14241.5	23215.7	28220.4	21349.9	10988.8	19916.4	39862.7	6169.46	37287	22406.3	27548.9	10895.4
P11276	65043.9	58406.6	79955.6	88600.7	73061.1	72256	81414	65278.8	95978.7	84703.9	42564.2	57250.7	45284.7	55295.2	63294.8	40313.5	80355.1	78307.1	57275.5	65092.2	63107	88781.2
P11352	1.6751e+06	1.36616e+06	1.37308e+06	1.31829e+06	1532584	1.59865e+06	1.29368e+06	1.61772e+06	1.83636e+06	2.47114e+06	1.53148e+06	2.00926e+06	1.95454e+06	1.71071e+06	1.25512e+06	1.21253e+06	1.99192e+06	1.13125e+06	1.56609e+06	1.41297e+06	3.67074e+06	968385
P11438	22682.4	29239	22647.7	27285.2	23405.3	25709.1	38696.6	48284.3	159791	115929	153943	62672	73320.8	54665.1	35657.5	117292	52089.1	40849.9	20189.1	43456.1	103362	10853
P11499	229728	259831	293480	320031	342720	291581	268350	303584	355155	339000	124450	249696	245255	248841	343931	218093	301723	265111	250258	259020	268178	316454
P11531	42628.4	29027.1	23186.5	30118.6	28968.7	23278.4	32803.1	22306.6	33685	23389.6	40699.5	21931.5	32987.2	37467.1	30917.2	33750.2	23831.9	29502.8	22303.3	36912.8	32144.3	32232.1
P11588	29799.5	21369.2	32660.6	33589.4	81745.4	17320.7	52210	42318.8	28594.9	9030.1	12533.3	NA	5588.16	NA	NA	NA	23359.7	14740.2	NA	NA	16459.7	4534.56
P11589	725628	501460	556259	517368	852846	801146	214314	330460	120761	573257	16875.6	96635.3	395794	3722.29	27844.6	7341.44	303651	156923	84182.2	201516	487140	151990
P11609	123811	106783	91885.3	53497.7	89759.9	200972	131078	191049	104282	155649	103812	140558	148792	37268.4	51192.8	33589.9	65018.5	55839.2	144956	173016	224992	75934.6
P11679	144667	104599	95472.6	112182	113966	158708	117861	110009	385097	146159	127715	176635	165984	83782.7	87279.2	215624	69421.1	76559.3	77328.1	92002.1	166119	76863.2
P11680	20480.9	12163.6	11541.8	20640.9	8605.94	50464.8	35167	46105.9	58909.5	8950.38	24197.6	15690	57431.6	51762.8	13934.1	53392.3	14256.6	12610.5	42035	24815.7	24971.7	6986.84
P11688	73079.8	53738.3	48564.2	45194.4	47476.2	67080.1	63420.8	65288.4	60032.7	85928.1	72605.1	59245	63197.4	43804.6	42744.6	55827.5	47375.7	45200.7	86463	108294	121199	49447.9
P11714	113805	67942.9	41870.7	18663.1	64314.7	57700.3	15884	14528	11869.5	NA	20460.5	14322.8	70747.5	47611.3	22885.5	46643.4	13446.7	13554.2	25583.4	24267	23159	29889.1
P11725	620085	695654	928219	949056	1.00554e+06	424364	623431	703555	466507	436975	461891	747126	547349	1104682	1.00219e+06	507136	782473	647416	309319	291917	296065	689840
P11835	36896.8	37282.6	33476.5	40649.3	22575.5	36066.9	38720.7	35931.6	24484.5	44936.9	46483.2	32351.6	61780.6	29275.5	24530.7	34583.4	49404.3	27424.7	44040.8	34179.1	80822.3	22746.2
P11859	74707.1	67641.7	60739.2	59143.6	65191.5	87127.4	77423.6	68574.2	82965.7	88740.2	126312	100844	115773	92530.4	76570	113684	66667.8	73649.2	79819.5	78065.7	109745	70126.4
P11862	38490.9	41746.8	33609.9	25285.3	19077.9	42767.9	40450.5	24980.9	43816.7	51766.4	38155.4	33207.9	45345.6	65180.9	43310.2	64541.8	42181.4	51671.2	93899.4	86622	119415	52974.3
P11881	7363.52	10414.3	26545.9	17971.7	17112.9	16835.6	18419.4	18022.6	17796.9	15928.2	18991.7	13691.9	13853.7	14705.7	20315.3	18028.1	15413.4	15858.3	8534.58	11709.3	13437.4	22472.2
P11928	9880.11	9883.8	21096.2	40743.1	15324.4	11374.6	8359.58	NA	NA	16083.6	NA	NA	NA	NA	NA	NA	14740.2	6797.19	NA	9205.24	NA	NA
P11930	109706	78794.7	203845	61593.8	99750	211705	123985	140673	249838	141202	106977	74821.5	130630	218830	153963	76238	125840	94128.9	73606.5	57260.6	149072	139927
P11983	72067.9	60335.5	81852.2	93858	96438.9	72684.2	50790	73889	102083	59423.8	51591.8	68530.4	54139	82941.7	73973.1	61561.1	94282.1	89599.6	63198.6	74012.2	47477.4	76940.9
P12023	12093.2	13736.9	12856.4	9845.08	10778.4	16309.2	19662.4	6823.17	NA	13759.6	20882.1	7948.43	15679.7	13136.1	13055.5	14406.7	9790.6	11224.1	12792.1	18187.5	29680.7	10502.3
P12265	31039.3	41511.2	67597.9	66337.1	62674.7	56706.3	38174.7	52288.5	51739.2	37139.4	48808.8	44116.6	34582.8	68764.1	86928.1	70685.1	43451.3	56864.6	18831.4	52546.5	23289.6	71633.8
P12367	98473	104486	77407	89577.7	142873	99828.5	124980	97433.5	44946.6	64988.2	114769	120551	175789	71594.3	112518	81207.2	54020.7	64572.2	58733.9	81866.5	61516.1	74664.1
P12382	32026.9	35263	62215.7	58191.2	56723.6	43721.8	34712.8	41856.6	35542.4	30661.8	40784.5	43156.8	19609.5	58047.7	64995.2	53953.2	53039.2	51147.5	19727.7	42525.4	20802.5	73641.6
P12710	124669	71122.4	90016.3	68501	75780.7	98923.2	81899.6	73633.5	206663	42630.6	46967.4	69432.5	113569	66489.1	51998.1	73908.1	50893.1	60567.3	42649.9	81171.7	71674.9	71691.5
P12787	2.45378e+06	2384289	1.92745e+06	1596859	1.61641e+06	2.90964e+06	2.22766e+06	2.02935e+06	740183	2637232	3.11385e+06	2186068	2.36257e+06	2.45709e+06	2.19151e+06	4697158	1828853	1.8602e+06	3.46173e+06	4345784	5.684e+06	1.74543e+06
P12790	119949	143942	168260	141759	160351	176705	87648	68605.5	171818	108372	97839.8	194707	119882	161023	193242	70194.6	204139	171170	56519.9	140163	146704	139128
P12791	77300.2	77632.3	90667.4	117476	78522.2	134678	233262	231990	299481	162145	205120	184309	156085	407241	123857	167948	181652	178031	153329	128528	155306	372299
P12815	150878	123199	107075	117158	100486	122714	125569	126839	90387.1	137615	128474	111788	147622	115184	107771	146838	104097	100928	136068	131916	157330	112505
P12970	65169.9	76918	139558	150644	158656	176642	67026.3	127340	174851	127682	59222.3	106694	68354.2	135055	160512	137593	193674	165089	35713.6	171292	97551	174968
P13020	54851.9	62986.9	89956.6	33004.3	50906	47635.8	57091.8	49180.2	48661.2	63245.4	45957.4	65769.8	130199	56987.7	110303	76216.2	39891.9	48183.4	25837.9	15283.1	21618.9	41468.1
P13439	97106.3	101988	118172	118145	114069	102889	119091	95115.5	111515	113825	95713.1	131080	118982	86131.7	102842	92040.6	117170	136790	116366	90308.6	115716	163837
P13504	214513	181583	190729	209376	179126	203571	215594	220741	209427	207663	125571	178908	233947	104941	148886	90895.6	224437	265728	255006	216411	301959	234013
P13516	92984.6	58666.2	60835.3	94889.7	60922.7	72505.4	33798.9	26100	68508.2	49244.9	71444.4	33193	46348.9	88815.9	53736.2	74233.2	234639	191390	71176.9	231090	124013	77197.3
P13597	117102	83967.1	78113.6	112521	63519.5	110703	136127	124260	151427	157461	121546	105305	170798	111742	105059	106465	72464	81405.7	117711	133214	251351	78880.4
P13634	113800	63136.4	171673	113861	85579.7	158596	87692.9	291102	150809	74002.2	143420	211722	272848	224242	271113	193920	176058	41660.1	74952.9	137179	87277.2	139881
P13707	475637	388276	322011	300326	377073	350200	264010	342176	406712	335316	316785	408929	429616	320591	414533	458138	406659	369464	444217	475299	332906	366376
P13808	28226.4	390544	1097.92	1015.23	14463.8	30531.5	1644.28	NA	30564.2	11390.9	31947.6	20251.6	62428.2	NA	116673	91441.5	6435.91	1155.37	NA	2691.23	20332.2	NA
P14069	49815.9	12017.9	44332.2	44794.4	41110.1	7690.01	33365.5	47016.4	239974	106667	57727.6	29503.2	63589.8	53575.6	54406.3	58668.6	39950.7	48367.6	83823	31775.8	62824.2	52204.4
P14094	346857	346349	352345	296892	301801	545552	344909	318303	453607	327750	383856	331028	351050	476123	332082	452122	226869	258762	305606	339381	402096	266660
P14106	5396.19	9383.8	21065.9	16648	10679.7	11059.4	10118.1	7089.44	NA	4468.34	12049.5	8159.98	9264.2	21431	18164.6	16857.8	14345.9	9430.24	334.868	8331.08	2960.57	13745.6
P14115	337091	64441	483652	484790	502110	523703	358130	414975	832727	414877	261083	349999	395373	134713	425680	521625	662695	518067	868923	448586	304339	490471
P14131	306038	332005	494258	623986	642294	559468	243342	336736	160757	326432	196701	237072	242916	416910	468430	374952	705761	614004	161053	457543	315312	612692
P14148	243898	147838	338297	396554	466564	359467	157418	248384	220500	255154	91004.6	300001	195465	300077	258040	188204	399142	316205	132115	257934	145878	358221
P14152	538363	432638	454227	301688	469412	1.07795e+06	402910	543318	1.19076e+06	303436	301877	293658	1.25426e+06	1.7763e+06	848300	573945	329362	626411	154640	375406	829673	300116
P14206	306470	284957	200517	230831	236684	390601	222229	454842	283262	324816	251952	376885	342349	205918	270709	292479	319522	201406	319179	371328	497621	207726
P14211	858352	210618	203309	243086	395594	372459	213639	328380	530186	301183	252641	256905	485879	495972	257020	362023	274744	195087	334467	421203	549325	380523
P14246	407519	310774	601181	424210	457555	446692	330840	347815	365802	285465	463340	483062	316476	600321	735921	562794	360266	428382	116784	258424	171915	396694
P14434;P14438	60452.2	43248.8	37666.7	86544.9	35091.6	43445.4	50790.8	66730.7	69092.5	94832.4	38914.8	68213.3	48633.6	81944.6	NA	NA	42345.8	NA	NA	34234.7	93444	44265.5
P14576	124070	81334.9	88432.6	92757	91141.8	96420.4	80456.1	103039	103485	84881.8	60254	76222.4	88758.8	59414.4	57901.5	68800.4	78862.6	74419.2	103409	73961.5	107088	85469.3
P14602	41909.9	36888.8	73463.7	13309.9	52108.6	52160.3	63537.4	32589.4	38893.8	118189	53361.1	56440.4	83456	33346.3	32122.6	19228.5	32838.5	21365.7	73015.8	90968.5	185277	39430.8
P14685	81843.2	57413.3	78895.9	79075.9	76157.2	62985.3	50985.5	89462.8	92734.8	93927.2	56575.3	60437.9	58956.1	71505.6	73293.2	63021.2	89946.5	92133.9	38412.2	73998.6	51865.3	74316.3
P14733	19066.6	22453.5	21977.1	21131.4	17671.6	13811	15426.4	11185.5	30893.2	27421	25014.2	24523.8	15659.3	30116.9	18375.1	25913.4	14625.9	7032.96	7383.2	19353.9	14336.7	18965.5
P14824	417516	260882	348726	239873	276025	440051	328548	458361	391671	513116	342252	430020	451832	338206	268624	291883	374441	281489	510668	412792	775027	275282
P14869	298719	284500	280765	361782	421707	384203	282295	463251	655218	700962	276004	249234	436790	342649	342373	296735	293747	373452	359965	355331	432342	493181
P14901	42391.6	34317.1	27835.3	46422.5	27748.4	26383.9	32245.1	42351.4	61882.8	59050.5	36348.4	33077.8	62991.9	56820.1	39368.9	98251.1	44020	32517.1	49227.2	43678.7	70309	41476.1
P15092	3535.57	3834.4	4279.99	6583.54	4257.6	5575.31	5346.07	5323.76	22105.6	5123.12	8073.94	4780.63	7437.55	1574.96	3270.74	4147.41	7740.5	3797.6	2539.63	4001.84	10188.8	6059.1
P15105	413632	203391	280697	195473	319084	456990	133052	242104	398294	247778	256587	209649	251433	152496	155250	177267	214986	140134	185755	130303	156656	123097
P15116	72616.2	79282.2	44341	58659.9	58324.9	58037.9	89577.4	89172.8	87043.4	113275	93881	95640.1	93420.4	50893.4	65609.4	106426	68744.8	48693.3	80283	63759.1	84887.2	49370.8
P15208	18427.9	18208.2	12957.2	16888.8	18096	22051.5	24370.1	18031.2	23560.6	20487.2	19428.3	18813	23942.9	23225.1	20453.4	17347.2	15829.8	17309.1	19004.5	16699.5	19536.9	19604.1
P15327	60718.8	26228.6	38175.3	33434.4	37142.7	46027.4	50501.5	34964.1	20151.5	26732.9	26804.5	29221.7	237933	54287.1	89061.3	46607	34228	16151.7	37681.8	36396.1	42093.7	14554.5
P15379	43954.7	28219.5	52297.1	97464.5	24418.8	51583.7	37852.9	62023.8	56423.3	65887	69059.1	41273.4	55302.8	57471.4	23898.7	47818	98522.6	23201.8	37549.3	42974.7	86262.4	27387.6
P15392	102098	141709	186910	204740	88636.5	161770	292219	368053	359289	296279	158752	212869	335189	109381	278543	126428	321517	317598	183876	234766	255832	197592
P15508	9278.21	12689.9	7915.19	9804.64	9193.86	5687.03	8644.11	12848.1	17033	14317.1	16498.4	16618.6	81456.8	27612.5	29566.5	22053.7	13272.1	6712.85	13255	17757.9	21523.7	12088.2
P15532	2.56659e+06	1.19334e+06	921713	870865	1609229	1.82961e+06	346507	1.42375e+06	1.4621e+06	1810754	1.32712e+06	1.6019e+06	1.87187e+06	920907	1.22678e+06	1.6909e+06	731872	798337	1.81677e+06	3.93385e+06	4.60005e+06	929175
P15535	26484.6	27485	13147.2	41546.4	18298.6	35413	56060.9	25424.8	96820.4	42067.4	31558.3	22922.1	77240.4	48094.5	51629.4	58263.5	42339.9	30003.7	46509.4	52565	40425.7	41213.4
P15626	306390	206547	135380	90113.2	127281	195793	235934	244133	237334	385922	216066	294162	242694	178454	203410	206478	281791	225324	209900	288836	538171	317542
P15864	222026	160636	134454	180626	179723	186502	171206	75072.4	1.12889e+06	126254	232271	165551	199919	294354	201701	281604	113911	103775	60061.2	62318.8	110535	72194
P16015	395579	335917	336442	384190	463962	489780	261500	324203	514619	208145	202366	427730	667140	125754	234883	136093	322840	321854	114773	111195	140535	180490
P16045	180452	167679	196676	136895	116525	176540	261456	298467	569462	409895	233584	302903	318647	84515.7	149921	98904.2	223873	203876	209301	254604	477166	314940
P16056	11825.5	13618	14240.9	14636.1	14250	11544.2	13507.4	8737.37	8812.48	5722.69	7987.71	8654.62	11810.2	14435.4	11612.7	11175.6	10970.8	18580.6	11545.6	9433.06	10164.5	16854.8
P16110	55906.1	30425.5	32945.8	68880.9	27208.6	21969.3	57128.4	31906.9	42320.1	49263.1	40512.5	49410.9	58254.5	50019.3	34143.3	62223.9	60266.1	35595.8	28837	33922.2	86586.5	45672.9
P16125	59024	58165.3	74604.8	41183.4	49789.7	61565.2	56111.1	82231.5	38995.2	52232.6	67902.4	83209.6	65603	103716	82243.7	51760.2	62299.6	61807.9	54419.6	79795.8	64331.2	61138.8
P16254	239797	235023	199949	195902	205587	120614	237686	187001	158895	184277	265137	174906	191310	189196	161542	210182	147530	159754	171048	183449	206198	176880
P16294	37196.4	31850.3	32915	31901.8	32274.2	47177.5	42934.3	52695.1	60041.4	57709.8	46194.2	46387.1	52950.4	32183.4	23005.1	35338.7	47983.5	33753.8	57148.2	66699.4	82154.9	48460.6
P16301	104241	64473.6	53195.8	47111.6	50951.8	56884.2	67507	69218.6	71242.4	83286.7	68388.7	90630.2	113158	63802.2	83031.3	76850.7	49203.8	35731.4	64828.6	78943.3	124367	47926.8
P16330	12388.7	16250	26304.7	23091.3	18791.3	23028.7	10227.4	17232.6	43888.5	19510	39187.1	19538.9	10460.8	28458.1	20818.9	35264.8	35656.8	31472.8	14513	20382.4	9595.07	30069.3
P16331	585495	352831	379471	356340	329277	342329	289179	424873	887305	347977	339660	307366	390001	489566	381939	445213	287049	287080	228439	171072	368655	252425
P16332	269280	280634	235678	183227	245359	200483	238251	254119	233404	247206	319924	218904	327997	359553	244442	280242	207224	190704	251423	217955	218634	239142
P16406	82924.9	63752.3	76067.8	67567.6	72078.4	71714.8	105460	98291	148866	83935.7	78299.3	97170.5	86308.2	86513.8	97545.5	75902	78285.4	76677.2	155748	108384	130669	98467.4
P16460	334041	230760	346208	234427	313960	314690	362645	258528	374631	199881	379395	260011	427219	1.30961e+06	599502	605512	459222	365148	321283	398429	261630	262005
P16546	89442	60344.4	57671.6	60956.7	52062.1	72951.8	75515.7	66237.3	75599.8	71749.2	76267	63331.3	80749.9	59226.5	54329.3	71878.3	48856.9	54237.9	81542	86366.1	106402	54024
P16627	655082	563556	547239	316725	596335	548745	318252	278895	664739	377239	596228	610718	225041	156707	168344	442436	340366	468247	352597	907846	945291	332015
P16675	60600	77127.6	89059.7	152294	100162	77334.8	72320.8	55997.9	48992.3	71005.2	87000.3	113741	84175.9	166560	186036	97656.3	123834	76874.2	80031.7	58510.9	96240.3	78779.4
P16858	333614	618342	1056554	853392	861740	907711	562663	799031	995828	656244	494453	997669	515076	1072753	944586	911733	1.10484e+06	1.02607e+06	487308	692320	679512	967982
P16882	31441.1	10008.3	27860.3	8285.04	3829.27	11711.7	6869.96	20421.5	17387.3	15115.1	31283.9	7304.29	16236.9	NA	7603.2	7474.34	8898.25	9335.21	7117.21	12208.2	23951.5	27516.3
P17047	587227	551784	393849	516175	464887	609909	648926	776091	713164	782906	583842	502492	885454	354809	391802	462061	447034	417894	738614	1.00207e+06	1.35119e+06	453913
P17156	22490	22348	26667.9	33225.7	12238.3	23915.5	35106.1	29403.4	51508.7	37593.7	77436.9	33468.8	24778.6	39169	35828.9	54957.1	26141.7	21494.9	75227.5	49281.5	74008.5	33187.1
P17182	847669	538142	523767	430636	334008	309164	649674	384272	883435	388737	759769	336896	761076	1.04792e+06	498428	1.16198e+06	382109	472999	697439	564078	584624	503392
P17183	8981831	7.37103e+06	7.55303e+06	5898546	5418933	6.39932e+06	9203255	8653249	8.35775e+06	10040288	10110647	7.47854e+06	16461417	8308432	11981140	7.67164e+06	5.32904e+06	6779098	15576083	8577152	10384749	7183584
P17225	334678	123965	250982	193657	202840	285208	240565	268844	230244	209096	271886	97284.1	211203	321360	264494	223093	256053	237709	300736	364301	333867	231375
P17426	19194.9	12866	30410.2	27669.3	23870.2	15865.3	12297.7	12921.1	16762.3	17605	17161.7	16038.8	15055.2	37494.9	22895.5	21355.7	15068.9	21367.6	6399.37	13012.8	7991.92	24230.6
P17427	46490.3	52130.2	99626.5	89142.5	79320.7	63169	56143.4	65061.2	66561.8	58693.5	38474	56002.9	38387.7	63107	68524.2	36996.8	52487.5	56137.1	34692.6	34052.5	31174.5	60042.7
P17439	74507.8	84520.2	72514.6	59727.8	65732	79413	88218.5	88726.3	56433.8	76293.5	86297	67631.6	88760.8	67346	71992.3	74202	67626.6	50174.6	91500.7	74600.7	110477	87471.3
P17563	340488	231852	320223	688910	565421	409149	227479	523330	571449	366150	269615	674100	602232	371918	331797	184658	472382	626120	635132	238500	197319	263408
P17665	342784	302466	407201	203370	348806	712687	387402	512624	323134	512844	295668	337995	433992	337057	236758	233157	456920	243535	518197	493642	810773	288001
P17710	17470.8	21631.8	41904.9	30877.1	24954.9	20873.8	29452.3	24199.9	40424.2	25955.3	24088.1	22552.1	21014.5	37512.3	34137.3	33815.6	27764.6	21023.7	11520.1	12470.7	7038.69	25192.1
P17717	321064	253966	213224	238483	276448	329569	187834	420549	287270	346222	381885	245006	279020	292522	271466	124158	326678	169879	169713	329433	255059	185008
P17742	1.28105e+06	839286	725702	535586	701310	906600	784400	1131117	659209	1.77652e+06	591567	1.11382e+06	1.29027e+06	440850	797453	877840	364560	573817	1250771	644839	1.11291e+06	450562
P17751	832411	444345	486105	424495	452595	436192	766853	415976	1.41221e+06	462786	682357	441520	799563	737840	589221	1.27265e+06	270487	287392	1.2131e+06	626613	642967	375884
P17879;Q61696	143440	99561.9	107332	96031.7	111176	138433	99637.8	223073	112256	172138	179850	248864	262277	80822.9	151844	135765	121599	178989	223496	286516	367702	163471
P17918	64418.1	51031.2	31987	56521.7	32195.2	53567.7	44030.6	54965.6	45349.2	62881.3	55105.3	49182.3	42444.5	41101.1	42790.5	61411.9	58862	53003.2	90703.7	93209.8	134367	40263.1
P18242	269337	255357	253667	357579	320701	267902	539136	310963	362193	400915	371682	351699	376595	370116	405675	500545	342948	293764	330430	410736	484229	348695
P18572	1.60752e+06	1.17273e+06	865434	805202	881742	1.21904e+06	1298962	1.17736e+06	617106	1076501	1.40102e+06	901079	1.34721e+06	896443	836566	1.15623e+06	901564	855006	1.5732e+06	1586664	2.03687e+06	914711
P18581	18508.3	23566.9	14752.8	13604.8	22144.6	13444	8017.8	15157.8	44915.4	5658.15	26252.1	21410.3	27070.8	71688.9	38876.4	44186.6	23652.3	20681	7520.54	20033	16681.9	9050.02
P18608	16871.7	25659.5	15739.2	14563	12198	34689.9	25229.1	21786.1	43936.7	17748	27405.2	23620.4	38673.4	14741.2	16237.1	21487.8	20402.5	19746.3	41229.1	55678.4	84312	14328.7
P18653	42559.7	34401.2	33475.3	40171	28431.6	36857.4	33586.6	35511.4	45026.7	51347.9	32695.9	33679.6	53050.8	19540.6	17753.3	46231.3	30798.3	26073.7	44528.2	44291.1	76769.8	37583.1
P18654	31100.5	29669.2	28399.4	25010.7	28872.8	25075.5	35634.7	28628.9	29687.9	37889.9	27511.8	29637.2	27617.6	50925.3	30785.5	47705.3	23891.3	22013	43525.8	34447.7	36405.6	26355
P18760	333699	280487	438470	231118	178774	647524	290742	350598	308920	420480	300595	458204	951474	445591	399303	370343	501883	272279	485665	389535	501507	350522
P18826	5889.38	12335.7	26791.3	21131.3	20140.5	16195.9	9483.83	12505.9	15835.4	12338.9	NA	13077.8	6246.96	11078.8	14689.3	9696.41	NA	10345	19981.3	NA	9876.79	11180.5
P18828	20947.5	29752.1	47521.2	18741.8	22794.3	40332.8	86335.5	60010.8	104976	79243.1	21051.9	42411.2	21504.7	19154.1	36443.7	25197.8	84367.6	56522.6	44059.4	73431.7	120542	82293.6
P19096	120003	118689	224806	135684	161237	172307	159215	171120	246078	192167	134371	160091	130204	136692	143620	127624	300750	309559	213928	343569	219048	272906
P19157	181667	180337	118253	94265.9	77413.5	59512.6	133201	56180.8	98283.9	78068	230242	92306.8	94608.9	135002	167526	269316	56065.3	92791.2	229119	314486	232709	112057
P19221	102597	85279.3	60962.9	75418.7	67618.7	104706	100326	125636	98165.8	122970	100020	98311	213654	73378.7	117000	130770	85602.4	82981.8	132824	173522	224414	70706.2
P19253	174378	77905.8	100798	355615	119154	92920.9	44126.6	70745.5	69044.7	78673.9	115293	226969	97603.5	119462	86753.8	110055	140966	109604	64592	77615.4	168594	340441
P19258	51018.1	40288.6	59701.9	78898.8	63165.7	62139.7	66598.1	53064.7	42055.1	41632.8	48208.5	68111.4	114087	104060	77503	67226.4	71016	57848.8	32497.6	68776.3	45424.8	86575.7
P19324	29344.8	34750.2	45794	47052.1	40668.5	29529.4	29482	23642.9	38273.6	49032.6	25457.3	30322.1	29538.1	23661.5	22560.9	18899.9	53677.4	37321.1	48159.2	33436.1	34781.9	57730.6
P19426	45133.1	71654.7	36626.7	52663.9	57390.2	40165.6	51104.8	68057.5	44632.5	72193.2	56465.5	47650.2	47472.1	40735.3	10406	79144.3	29635.6	52958.9	67568.8	83662.1	42506	17916
P19536	174501	247607	108644	145457	92164.7	86419.4	254427	172816	635897	163630	258924	95551.1	113988	127690	171922	166794	93976	146757	169719	224326	228898	101966
P19639	55148.5	100827	89601	90543.8	108872	116182	136030	96367.8	263288	359165	307592	212217	190316	249187	226776	541993	176548	225743	491697	327892	469058	559747
P19783	109798	135303	136826	74574.6	129524	286403	133324	199005	178987	202256	152478	197519	1.5549e+06	181270	120772	132072	1.50697e+06	123654	127811	142914	209519	98036.6
P19973	9241.09	5180.94	6622.62	8410.28	5133.8	3068.8	11526.3	5305.05	110192	6759.28	9915.95	5907.32	7370.67	8402.76	10191.1	10865.6	9547.46	9059.29	4632.44	6134.09	10962.2	6731.36
P20029	354085	380018	193462	234123	298832	233911	268205	393338	514083	397266	283112	207677	428343	357854	365247	576915	212454	214701	274296	341592	502359	197526
P20060	75481.8	62668.4	55244.5	61437.4	62025.9	74903.2	121486	101071	54192.9	94787.2	111813	117546	118445	78525.4	91083	98600.8	81763.8	69385.7	85739.6	81174.3	104273	88220.5
P20108	327900	91330.7	84349.9	109791	182937	287421	79479.9	125366	445706	281714	80345.4	124477	124337	344834	342326	251913	102437	262843	136186	290146	262118	199408
P20152	63481.1	44971.1	75011.2	91500.8	68973.1	72261.4	66741.8	73915.3	76202.4	101263	83374.4	102602	93649.2	93778.5	68268.5	126185	61339.4	59315.9	50887	68255.4	86083.7	58473.7
P20444	14630.1	NA	37515.6	20514.6	25893.7	21328.4	26985.2	19552.8	35062.9	18004.1	8078.63	19448.3	11425.4	15165.3	27291.2	20069.6	31246.2	31126.6	14575.4	21144.8	16786.4	26670.6
P20491	80081.8	44597.3	55453.5	96136.6	44380.7	52885.5	65326.8	75018.1	35567.4	89419.7	67327.2	68576.6	105246	79542.3	77704	58275.7	95768.7	48791.4	39269.2	58701.4	124252	54128.7
P20852	137093	98646.2	142564	137606	93805.9	128400	166190	217466	192589	184018	171580	267684	339408	180285	270805	229626	178855	174372	138195	85964.1	231145	119190
P20918	53180.3	59817.1	79240.6	68719.6	66399.5	70143.6	64193.6	72953.8	90027.4	74241.8	46417.1	66449.4	93127	74459.5	132068	97973.3	78936.1	70261.1	37506.6	85125.8	70856.6	78601.1
P21107	174383	219995	137015	82294.4	76282.6	97596.5	138899	113674	232162	87401.4	173067	60353.7	110344	190714	173738	252577	101855	73134.9	129392	161334	230832	60814.4
P21126	72469.9	51592.4	37671.1	24709.3	25800.5	39837.6	45106.5	40420.7	27241	50970.2	60615.2	42314.1	41707.6	36325	32047.5	44981.5	37846.4	31031.1	96328.5	87964.5	116279	34152.4
P21278	29785	34059.9	54961.2	48632.6	57163.7	39189.7	38791	38560.5	51035.2	49945.7	27599.1	40571	38163.2	56398.1	52752.4	41745.5	47155	44189.8	20880.6	36846.1	22614.2	49705.7
P21279	49949.9	61257.9	77815.9	77384	72054	62948.5	69495.4	65058	73481.9	61966.3	61456	64634.8	62470.8	75529.9	69857.9	76304.3	64697.1	56374.4	38419.9	39027.3	35780.3	60790
P21300	23191.9	13652.2	17528	15274.9	6521.06	12663.8	35865.8	12850.7	20442.8	27944.7	43167	21156.4	14207.4	123032	36925.8	180372	10827.2	23596	40813.1	26029.6	13118.2	67221.2
P21440	59749.6	58474.4	77252.8	69491	90448.2	61700.1	54494.9	64609.9	59757.8	48933.7	59040.6	66090.2	35954.2	89653.3	73481	49521.1	74614.7	62822.7	31383.2	42399.6	46152.3	62467.3
P21460	30317.5	26604	37664.4	49852.4	40244.1	26376.8	35284.9	34830.6	224254	25384.1	25797.2	30891.4	31642.5	39193.6	40120.6	26323.1	40027	32150.3	24324.3	42008.5	22135.9	28859.7
P21550	2.09481e+06	2.12606e+06	1.89639e+06	1.92378e+06	1.71025e+06	1.89868e+06	2754644	2.20288e+06	2269163	2.53704e+06	2.17636e+06	1.85448e+06	3.42397e+06	1.87441e+06	1.36162e+06	1.57401e+06	1.60895e+06	2.34028e+06	4245019	2.54429e+06	2.81662e+06	2365437
P21570	34220.8	20709.6	20683.9	37442.8	22945.1	25936.5	47726.1	53217.4	NA	64815.1	53819.3	44893	28647.6	15914.8	28508.4	11689.1	32650.3	16402.6	32146.9	3147.95	10425.8	39628.4
P21614	99536	75247.4	64386.9	56281.3	61474.4	130809	87519.1	129231	104079	142540	129393	98866.8	151306	69482.6	103287	133976	92267.7	61183.9	141359	166778	217219	77112.5
P21619	44521.6	25407.6	33975.2	22257.8	27714.2	64971	74849.5	43591	71651.1	61694.7	57559.7	49860.2	47422.5	20193.5	40883.2	55823.4	22135.9	27080.3	47128.4	52512.2	57680.4	31600.7
P21958	27339.9	19144.7	43820.2	99854.4	34439.5	40958.8	19155.3	26058.9	21878.7	28680	4864.37	26913.9	20092.5	15297.6	18160.8	6892.93	25212	26991	NA	12982	14377.4	37733.9
P21981	97732.3	111790	84973.7	164661	119398	131713	76556.9	113716	242006	160215	70053.3	135326	116697	73961.9	60093.8	96463.2	81728.3	110602	83286.7	91623.5	129600	162567
P22315	117379	132067	113355	99480.7	109914	104125	130580	99995.8	143479	122146	132567	137689	142101	167858	130105	148867	126475	109704	119785	110091	107548	88430.5
P22361	34295.7	22347.5	38728.7	40790.6	21105.1	11784.4	44197.1	28373.7	267934	19786.5	60502.7	10451.2	13918	46534.3	35886.5	33684.5	14146.6	28935.3	21742.3	32046.8	35643.3	34479.1
P22437	32865.1	38340.1	45404.9	85415	44089.5	32542.8	47505.2	39160.9	46529.7	49036.1	33808.6	32019.8	46586.6	49403.9	42945.8	42025.2	48040.2	39866.8	30609.1	26765.5	32113.1	54460.5
P22599	252580	200749	207739	142358	201437	232777	300486	262475	136200	243229	229062	265517	382675	379673	336799	278909	177185	220221	327410	468250	352072	220385
P22892	25140.9	27273.1	48787.2	54933.6	49382.3	40754.2	23122.7	41476.2	23466.1	51561.8	16062.4	26411.1	32268	45596	45599.6	28656.2	39945.1	39409.1	22922.5	25178.2	22083.1	46934.8
P22907	106182	88255.9	65515.8	64411.4	77639.8	83448.5	78551.1	83473.4	48077	108379	89271.3	82007.3	83827.1	76634.2	87502	81578.2	96945.5	67231.2	130879	85392.9	100998	99910.2
P23116	64594.8	67362.2	65738.1	80363.3	62952.1	77053.7	60311	95681.9	81855.6	85573.4	78244.4	77874.4	83757.5	88006.2	90989.3	70073.2	79693.7	91545.4	123689	100537	99240.6	91457.8
P23198	119774	84801.2	68315.1	60685.6	68799.1	69190.6	117335	91384.5	66580.3	73170.4	78807.8	74811.7	66967.2	51887.8	38048.9	67117	63156.1	74711.8	136257	138613	180623	71470
P23249	18381.1	23511.5	55848.9	75530.2	57132.2	39438.9	20350.3	33293.3	49619.1	30788.8	18296.5	28693.3	16122.8	35284.2	29450.7	33363.3	38845.1	45480.7	15915.3	34885.7	20789.2	65762.2
P23475	14350.1	11281	5447.34	16643.4	6438.54	11965.1	8226.69	5145.61	11358.7	7843.44	7785.01	12652.3	10071.7	13425.3	12891.8	23109.9	7765.25	10684.2	24860.5	15492.4	10011.1	6506.93
P23492	89667	119872	183132	156749	132963	143652	131751	140937	211306	80156.6	96378.6	128871	82562.7	154933	155396	80814.6	176504	158507	74207.9	120727	80568.8	157232
P23506	129457	114388	80466.4	75087.7	72118.6	90143.6	121304	101808	113774	122382	133781	92988.3	196814	87152.1	80995.3	117540	75200.4	74447.3	140963	165047	221163	67740.5
P23589	231833	217954	168853	184856	179797	200630	170714	186090	124408	138985	143185	140252	188715	93924.4	162194	96520	124520	140820	136149	147040	161322	129550
P23591	34899.6	26718.8	32528.4	29866.5	30356	28887.5	32306	26766.1	31456.2	27959.6	35094.2	42344.2	32385.2	46073.1	50699.3	48010.6	27205.6	33674.6	53782	24339.7	33256.4	28333.5
P23780	45897.1	33226.5	82766.1	66681.5	72560.4	45078.9	54263.4	72820.5	67932.2	63261.6	48646.2	73467.8	53825.3	70442.3	73556.9	48579.3	59799.6	43543.9	39807	53477.7	59897.3	56590.5
P23881	31410.7	29494	14912	25697.2	16329.2	34570.7	35522.9	20734	47210.4	27298	29263.6	43499.1	30856.2	54746.3	28576.1	64708.7	40031.8	43545.4	74527.3	51960.7	88052.6	55965.8
P23953	116481	98579	146504	145063	147355	168000	152185	156757	195615	123234	164455	114684	234401	179439	267890	192990	121637	119110	89313.3	127729	144823	130587
P24270	418644	288781	290226	219058	357386	495579	314129	417023	1.48191e+06	503303	296754	557745	695646	510058	338953	384975	617438	500972	487167	325493	552531	341269
P24369	233624	253408	280711	410546	299711	238092	213323	338542	195762	371823	217026	273779	414426	246478	278604	280892	393929	292229	298904	479072	320587	379627
P24452	34388.5	29842.9	29183.6	35982.8	21773.2	24460.5	45930.2	33139.8	52769.5	54131.9	65737.4	53592.9	72344	37721.6	33910.4	67902.3	32109.4	24117.8	41739.5	38813.8	70635.8	28321.9
P24456	231690	244685	282789	251352	268933	317716	192403	279189	261620	302847	233621	297146	230298	175561	223109	172892	290338	240617	197528	273541	220790	262803
P24457	133533	178211	180674	150144	176854	211636	157523	159347	541037	142481	217311	237514	182198	218762	257656	247465	193301	189335	119385	108973	113052	140546
P24472	661252	547157	831673	682240	610451	716571	1.07492e+06	910432	219368	975195	1.17143e+06	901414	721935	1.38253e+06	682581	802262	917342	1048379	1.13941e+06	441363	807781	953527
P24527	84658.5	91518.6	147321	126975	138221	107828	108262	127089	112725	122080	95297.7	131293	94667.6	108894	122352	83807.8	94279.3	91516.1	103169	70049.5	89690.8	121375
P24547	52379.2	48730.1	51422.7	68911.9	51598	31521	33974.5	30594	33612.3	21826.1	65334	53698.9	51549.1	65162.6	54535.1	57310.6	38399.1	58864.6	38693.4	31785.3	26389	56514.6
P24549	1.1057e+06	518985	689025	523842	1.04124e+06	905931	315771	533457	867522	907090	354098	689948	796323	327232	621798	567974	1.38051e+06	766256	511810	829193	448574	1.12853e+06
P24638	66090.7	58223	43751.1	68870	46281	71773.8	66430.7	59326.2	46885.3	71457.2	54477.7	47754.7	87584.7	41681	44807.6	61637.1	41424.4	52288.7	50837.4	94598.3	125303	50646.2
P24668	141535	71657.4	54749.7	67496	76995	140164	49138.8	145763	101609	155228	48800.8	113831	150529	63871.8	45228	84000.6	81308	46115.1	155323	204148	334743	91864.9
P24721	93631.9	57942.2	66429.7	84341.9	57999.8	79974.4	56783.5	88483.1	34016.9	131853	56024.7	60084.2	106105	70978.1	73044.2	103687	75597.2	67674.5	128067	172627	148808	96451.1
P24788	29199.5	27854	23452.5	23806.9	18980.6	28548.2	30269	28586.2	15853.2	33139	30413.2	27531.9	31105.3	16144.9	17229	27091.5	24615.2	22329.9	33153.7	41339	53981.5	18743.2
P25425	9075.41	11657.1	8870.97	4811.51	14159.7	31994.2	19368.8	17483.3	NA	19379.9	11462.3	NA	22097.7	21527.9	31118.2	15406.1	66037.8	NA	28356.8	23987.8	49642.3	14053.8
P25444	315373	302272	489911	774472	890122	643973	267482	486405	471121	623243	146472	443104	474459	441247	408410	316464	820718	688124	275944	601036	377868	428774
P25446	28426.5	22296.7	8863.83	16843.5	15664.6	18702.8	17701	26329	26855.6	22870	16708.6	21113.1	20478.8	13048.1	8083.21	13331.2	17028.6	12741.4	34941.7	19051.7	22389.9	22003.8
P25688	201950	133123	124681	74777.9	89785.1	85796	158445	107208	181776	115641	187533	91076.6	178019	100132	196155	118139	131962	144100	223568	104011	129550	113647
P25799	40021.4	31914.6	33030.3	35373.4	13946.1	31917.8	37517.6	36365.8	32122.7	43378.5	28272.2	35557.7	50883.9	23011.9	14789.7	21246.9	30734.4	27985.6	38723	21629	42135.1	32157.6
P25911	54323.7	41591.6	66509	62826.7	59949.8	42171.7	55940.6	40154.2	64976.6	52271.2	55036.6	54289.8	49322	72400.4	54572.8	67186.3	57715.9	45297.3	33711.5	37963	37036.1	45573.6
P25976	19135.2	23319.8	19081.1	18708.2	25443.3	19047.2	24478.6	21930.4	20956.6	21352.6	25036.6	20947.4	22425.8	20190.9	25451.9	33060.4	14033.2	17463.2	27037.4	27718.8	26236.7	16752
P26039	119135	98308.4	91074	98424.9	87600.5	105677	119330	120510	127927	128166	127998	116558	142899	121054	126071	128212	109182	81033.8	117825	125867	152477	85173.9
P26040	41184.5	25977.6	46946	36612.5	27987.9	23251.6	34867.4	22570.3	36676	40429.7	23676.6	22608.6	54823.1	20697.9	28168.4	34209.1	24147.5	23218.5	28809.9	29138.1	29758.3	25591.8
P26041	65876.1	80426	112317	157121	114491	80572.7	62736.5	90218.8	111446	86461.9	76904.9	73105.2	60630.8	103983	107516	78252.2	65157.4	53613.7	57114.4	71627.7	64878.9	93950.2
P26043	124799	95883.2	159900	163705	177443	90524.1	89978.7	88181.2	204845	80372.9	60087.9	82831.2	137527	98785.1	85696.5	65672.5	97230.1	97606.6	80344	99283.8	76946.8	126843
P26150	189133	131730	168443	146603	193071	164281	32607.5	62673.8	109019	78204.3	67042.4	101402	46368	140740	96783.4	103609	136273	109753	58326	86797.5	46747.5	132430
P26187	31539.4	39211.8	21622.9	22882.2	40933.5	21949.8	29376.1	28110.9	26323.7	29891.1	27995.9	19745.5	28078.5	24797.3	15090.5	44170.4	27840.7	30246.1	37940.7	63219.8	79797	34644.4
P26231	71552.3	74101.9	47577.5	54699.2	53092.8	71198.1	77337	80082.2	99086.5	77825.7	71775.8	77450.4	69193.8	62126.4	59988.2	60566.1	63962.6	40182.1	77422	61106.3	90766.3	43263.9
P26262	23796.5	42844.1	35322.7	32720.3	36686.8	32385.9	45158.9	43632.9	24423.7	35310.4	19516.8	36952.1	46138.1	36181.2	49757.2	40100.1	33445.3	40386.7	19686.4	26240.1	35176.6	33293.1
P26350	3.91067e+06	972882	1.53074e+06	1.61195e+06	1.38953e+06	2129186	2.11685e+06	2.76312e+06	622425	3.6411e+06	2.9049e+06	2629839	2.61215e+06	1.71916e+06	1.1626e+06	1.35696e+06	1.79482e+06	1.35689e+06	1.47172e+06	3.51373e+06	6.02788e+06	1.49039e+06
P26369	118705	75567.5	75134.5	68700.7	69771.4	78292.3	75623.2	71931.8	72891.7	81416.4	93982.8	117116	149466	80879.1	91326.5	111767	50320.6	57683.5	71310.3	84686.9	75483.6	59336.1
P26443	800797	522508	710285	533988	630416	447880	409793	581118	847258	514565	724987	703259	497459	570213	893788	715850	728502	618389	422231	362485	398432	517127
P26450	23121.3	21863.1	13596.6	20078.7	16638.6	17296.3	21067.1	28917.4	27169.4	19140.4	21531.8	22404.8	22306.9	10013.2	15942.6	13828.9	16495.7	17588.3	14245.7	24728	28567.6	18475.2
P26516	132840	104820	100115	90357.3	99787.7	116074	108707	127537	71395.1	154380	105636	135621	153513	255902	120027	92427.1	134367	87150.9	175527	146126	215442	91764.2
P26638	67585.9	56041.4	60050	70360.5	66031.3	63672.8	52577.2	58185.9	63954.8	56636.8	66618.5	61837.5	72232.3	69716.2	62656.2	64916.3	55351.4	64014.5	80258.9	74962.5	80782	74132.4
P26645	48222.9	34383	26420.4	29631.3	11651.6	20964.6	24861.1	26882.2	425456	22761.3	29843.6	25290.9	37353.3	37603	33679.2	42526.6	17601.2	12743.6	37534.9	52162.7	92780.9	17580.8
P26883	124208	63854.7	44093.2	59301.1	80668	72183.5	199789	64401.7	80227.5	68095	50623.7	60041.6	66087.5	48034.9	34274.3	20986.5	37947.3	82491.3	68652.6	47836.7	192212	88728
P27005	46043.7	16719	18230.9	29821.8	8228.57	10914.2	68078.1	47515.8	33800.8	55485.2	39564.1	101646	76848.6	34088.5	41144.3	68056	57350.1	41231.3	90525	51059.8	114083	41892.1
P27046	28655.8	42956.8	66443.5	69230.2	63426.4	54969.9	35750.8	57388.2	50456.5	57628.5	31303.6	55198	43046.4	69718.2	61865.2	54181.8	98624.4	77240.7	27386.2	59628.9	42084.6	101130
P27048;P63163	10498.7	10947.8	24251.2	26828.7	22779.2	13833.6	11890.4	14885.4	12187.2	11360.1	12273.1	22588.9	NA	42820.7	27222.7	25868.7	17626.8	14428.9	NA	12342.5	NA	12728.5
P27546	81180.6	85079.1	70183.9	71417.8	61323.7	73604.1	85327.6	84947.6	143839	98054	105288	56337	55522.9	82005.8	56104.4	85413	73402.5	72571.2	135619	169554	203639	72476.3
P27601	32758.7	46194.2	50585.7	56830	49885.2	43866.9	54283.3	48085.6	48991.4	32070.2	48843.5	44559	35944.2	56262.3	50755	43598.9	51031.9	51585.1	32288.8	28949.1	18656.4	47995
P27612	30602.3	26987.2	67018.9	54543.3	53801.2	44475.9	29978	47934.4	53357.3	37686.4	37458	43775	24839.6	66822.5	41861.8	25731.9	63840	55329.6	23340.5	44745	29143.4	63830.2
P27641	44563.1	37362.5	39480.3	35907.9	35269.8	20234.4	37283.8	23432.7	29920.8	23667.3	48088.2	23617.1	24874.3	62846.5	36220.1	25030.9	43647.4	41429.1	62616	36460.6	61519.9	30613.6
P27656	218373	158486	107128	307386	148576	127994	174082	436252	20797.3	517584	104888	223657	641371	130037	348963	330229	212241	259992	559407	467516	584044	88410.4
P27659	274392	335482	362365	389214	381837	254244	248293	220759	125564	219383	243442	304538	185741	418754	321074	311220	336067	360280	102797	271058	185387	300506
P27773	443680	471128	297567	398361	307936	448133	442490	749564	382656	944031	551239	524782	786710	475742	661758	563130	676743	410100	698586	807273	1.58344e+06	292649
P27786	50758.9	47206	103274	50548.8	44306.7	63933.4	95535.7	149861	125481	97963.1	32818.9	61775.8	81106.2	54133.3	50811.6	42141.6	115844	69163.8	53998.4	88990.8	67405.7	120364
P28033	4538.75	4654.58	3943.75	3148.59	2740.76	3379.14	7927.7	6775	NA	5078.23	12246.9	5375.55	9970.32	8216.41	3855.32	14808.2	5010.73	6606.14	9525.3	7076.9	10464.3	6188.17
P28063	43282.5	54276	100308	158138	96333.8	78928.7	56103	76973.4	85316.2	76829.2	35898	43867.2	23545.5	26511.7	52248.9	50357.2	70293.4	80219.8	52504.1	78317.6	68814.4	79984.9
P28076	10257	116372	288421	14765.6	231051	27337	117646	10454.6	4850.85	12285.1	181168	NA	NA	187532	278280	NA	4762.68	98224.9	8576.63	NA	7427.74	NA
P28230	142360	146309	197511	187033	135689	206113	108009	146318	NA	142190	97420	144740	113576	217133	147105	114125	224994	204174	94758.1	133304	94105.1	103282
P28271	183000	143623	252989	188152	252285	230802	151277	239334	262115	208593	130551	172072	143851	221902	232967	143169	216750	222467	118355	183788	170899	180479
P28352	146921	171754	225876	238041	203948	213007	157103	209537	256067	168983	209396	199342	159374	280832	270187	319874	269550	236498	89202.8	208714	136490	202024
P28474	169389	146265	199860	239384	204286	196116	127268	160472	218646	178588	143817	255920	191701	224922	279080	308025	387528	369772	133820	200661	153098	220701
P28481	3.42027e+06	3.24258e+06	2.5838e+06	1.68649e+06	2.48289e+06	1.21886e+06	3.62857e+06	1576721	2.49195e+06	2.81718e+06	2918555	2.38124e+06	3535011	2.00264e+06	2.10595e+06	1.57127e+06	2.53454e+06	3126858	2256545	1.68753e+06	3.92999e+06	1.21245e+06
P28650	41526.4	57352.2	59888.1	60988.5	51587.1	52900.7	70951.3	46866.2	73034.3	55031.6	75656.3	104078	52079.2	147346	184747	103207	95070.4	103267	64294.2	46602.7	36349.8	65513.7
P28651	246272	205836	250875	179897	186044	212489	187111	192467	208299	178993	253089	241091	182056	187385	183876	129030	183801	184704	168646	174621	171579	138715
P28653	46593.2	49431.1	96828.9	51590.9	72299.6	61253	51454.7	69781.1	103618	327117	126190	192597	122258	117023	72869.1	158425	52067	61879	86215.4	137926	119593	81114.3
P28654	42608.4	64815.4	114672	56250.3	67296.9	67943	32233.6	57448.1	99049.1	183704	112332	146205	84590.8	78109.3	67320	151557	43168.2	49349.6	81943.1	111285	107953	89873.4
P28656	108934	72388.4	64969.8	55105	59049.4	63664.9	69201.3	86843.5	68904.3	88766.2	112779	73624.9	160710	81482.6	96050	172433	70772	66598	149289	202385	169823	73341.6
P28658	46742.8	45763.3	40918.8	40078.4	46669.6	41149.8	46341.2	41102	50372.2	50873.2	40602.1	36632.3	34360.6	32005.9	31362.3	41369	40573.1	49793.5	71323.8	72214.4	78704.1	39517.5
P28659	18871.2	25459.8	30496.9	23577.3	33058.3	23096.7	25272.2	17003.9	28141.4	16862.5	12755.5	26025.9	23040.8	25037.4	18660.5	15358.5	22604.3	28903.7	16709.4	21743.6	125865	28048.2
P28660	13842.3	17509.1	36543.6	36489.1	35573	20406	16892.5	26336.4	35560.8	16345.8	17513	26118.3	19357.2	33171	30806.1	31238.8	31704.4	25178.2	9694.39	15597.8	17691	29638.5
P28661	20845.4	32049.5	44576.2	44478.6	26278.3	34596.2	59552.9	46802.6	50873.9	61305.3	39614.4	52449.4	40577.5	37551.1	30690.4	39345.2	21918.5	37018.4	39614.5	26996.8	23456.4	36232.6
P28665	104477	118969	128836	93682.6	165001	80540.2	37176.6	34554.2	27832.7	25636.8	63867.7	59651.6	95007.6	90230	84870.6	83981.8	55493.3	40826.7	29839.5	46913.9	36474.3	33882.5
P28666	29842.1	43199.2	38226.2	32546.6	57840.3	37137.1	8057.85	6426.5	13929.3	13472	23584.5	26751.8	8790.6	16808.8	12266.8	8442.79	19402.3	15411.6	11325.2	12401	18852.8	12312.5
P28667	22921.6	45942	34455.2	25548.8	18378.3	23975	30116.2	17916.9	23696.3	26668.4	26067.9	7738.76	49970.3	8876.86	22929.1	21593.8	10125	17751.9	15471.3	45855	55797	16648.5
P28700	22965.7	19988.6	16943.5	15947.8	17812.1	24450.4	19210.8	22517.5	163670	22353.4	14538.1	19550.5	14421.9	6944.76	15376.6	11221.3	12498.1	12321.5	17092.9	14382.1	17172.2	12799.5
P28738	589490	432886	350843	314887	350755	488617	402945	573291	382815	616881	487195	466930	557104	374273	365137	486020	438800	386139	887632	1092207	1235904	374894
P28740	6097.7	6202.51	3856.97	6198.22	4971.41	5905.09	6873.89	3359.81	4445.99	5604.2	3617.35	3484.78	4375.19	1630.98	4062.28	4201.76	5973.39	4979.84	5604.78	6225.02	7137.65	4645.92
P28798	112007	89212.4	62431.3	78599.9	55019.3	104157	137006	101000	329412	115762	124942	100764	130278	90097.3	83272.6	121491	90443.4	74922.8	103339	140093	251856	68357.7
P28843	49673.1	75332.5	114935	67225.4	106745	75532.3	43056.5	76421.9	104646	63449	77419.7	73303.9	65868.1	75997.1	93223.5	68492.9	98419	67612.5	40555.6	66170.2	49144.7	66878.1
P29341	167095	188438	248649	263023	267201	181681	162193	219770	187030	163160	160165	194105	240791	251363	235968	216375	208624	161664	218325	169561	168637	179670
P29351	33028.1	37168	58219.8	74912	47281.8	50674.4	46046.9	53576.7	87641.7	41795.3	29412	37724.4	37715.5	72187.6	76461.1	36666.8	62959.1	36438.2	17769.7	23446.9	23268.3	52527.2
P29391	430606	665874	415660	694074	396386	581050	909266	1.62422e+06	912760	1.92731e+06	1.11618e+06	1.37495e+06	1.37615e+06	1.62984e+06	874463	787550	866783	1.22106e+06	1018220	923695	1.32505e+06	1.2858e+06
P29416	44395.5	42660.5	31115.6	39137.5	36392.9	40910.8	60150.9	53354.3	81275.6	88055.2	37626.8	39275.3	98866.9	33503.9	58298	72389	48246.6	37306.4	52342.5	57040.8	81898.3	34769.5
P29533	21910.6	22294.3	22800.1	35042.4	25813.9	32277.5	36566.7	37454.4	32310.1	51373.5	32418.7	36360.7	76014.4	44672.1	36189.8	37665.2	33987.9	27602.5	29148.4	40127.4	52313.9	23543
P29595	39436.9	43334.4	22176.7	33038.7	22987.4	462219	38277.4	5089.12	15324.2	12308.1	32010.2	455597	425971	9137.64	323994	45964.2	14720.5	30365	11204	23489.8	33832.8	29002.7
P29699	196770	160103	123545	102634	122149	155502	188930	163479	233144	157571	158635	138156	388495	165038	246014	270076	140159	110365	184553	258132	387310	110249
P29758	602738	716398	350613	330869	442500	526855	364232	315031	436998	393067	258674	310638	546515	516458	306749	356231	529637	531301	403015	306140	527473	373565
P29788	75958.1	91796	84824	89666.9	85007.5	112727	98646.2	87435.6	132531	108738	102938	90863	97103	108456	87563.5	101308	102230	77115	112701	99176.5	142120	113912
P30115	167596	80923.3	88934.4	95289.8	61244.8	98786.3	131676	110792	373701	200168	129114	196931	214150	132620	197056	109786	99567	91163.7	158778	107334	146129	106533
P30204	41015.6	27247.7	29572.1	36976.6	25643.1	34435.7	38253.1	32083.5	42440.4	54186.6	32050.4	47045.4	41957.2	31620.3	25248	29323	46459.7	30584.9	31974	47436.1	61391.3	37038.2
P30275	38007	40549.8	97506.7	16463.4	30412.1	21016.1	33838	19280.2	13461.2	68985.7	63727.7	39296.5	19285.8	57135.9	17133.4	595112	28209.9	30478.3	27704.5	36204.2	57392.4	23487.6
P30285	19181.8	21575.9	18481.9	25708.2	18202.7	9836.57	35855.3	29990.7	23500.8	29885	28322.8	21880.4	29359.4	23663.5	20158.2	23683	20044.8	25805	23202.4	16702.5	27884.4	27783.7
P30412	41524.7	37112.6	38212.3	40304.9	32300.9	43104.2	44049.2	39832.1	44032.9	44417.7	33950.5	40115.7	43231.6	26983.3	30311.8	33067.4	31404.4	38294.9	45550.5	40438	70088.7	48032.4
P30416	67358.3	78693.8	105910	98006.5	81341.8	90855.8	77786.7	112111	85972.2	61711.5	44218.3	57515	63354.6	77573.4	45997.4	32526.2	78242.1	87891.8	74499.5	93780.8	71775	101827
P30681	45623.1	33882.3	27437	43955.4	34882.1	38855.1	37776.5	51501.1	76490.4	61304.4	29308.3	25836.4	60798.6	28575.9	33850.6	53730.1	34600.6	24284.1	53165.5	30717.9	96016.2	30206.8
P30999	49840.4	55152.3	37213.2	45634.6	44879.1	40046.4	49779.3	43149.9	61436.8	56939.2	61324.6	47154.6	55939.6	46019.8	40561.8	59939.1	36464.3	31478.9	39341.5	39658.3	50992.5	29050
P31001	30639.8	16015.5	102883	18889.5	24434.6	23949.5	15018.7	18924.6	26403.3	50091.6	33795.1	43407.8	37722.5	28907.1	24873.9	37802.7	17560.1	16873.3	11609	18932.9	18479.5	14954.4
P31230	174511	163966	120925	135725	144217	83000.7	152064	92533.1	84024.5	97056.4	119619	93405.8	94299.5	98370.6	94637.2	159319	87286.9	126244	91312.7	122507	178515	129485
P31428	13106.2	16176.4	19708.2	12221	14217.5	10605.2	20349.5	16751.5	18806.3	30096.2	34596.9	30826.8	20283.1	34198.3	19676.3	57400.5	6177.22	16826.5	17690.9	27955.8	16712.2	16764.2
P31532	245110	42368.9	15553.1	19402.3	29707.7	25500.1	89172.1	129058	NA	68040.3	12910.8	1756.98	42096.4	53414.6	NA	42582.6	49212.2	510.014	87541.4	184831	206842	23715.8
P31649	29446.4	29272.7	40805.5	33436.4	36946.5	64338.5	35168.5	52837.6	64338.6	31057.7	41101.6	31456.3	51913.9	34078.9	56388.3	61235.1	44277.8	42804.4	22828	66359.5	50911.6	38487.1
P31651	67304.8	125565	130260	118896	141442	106820	88765.6	138350	121650	86797.1	105396	122961	49280.2	164194	193647	92032.1	110780	148945	90829.8	75900	97431.9	106131
P31725	211820	104849	104275	132245	23278.2	82700.3	86262.1	33456.2	34472.8	47160.7	33063	68819.3	75287.9	226541	42330	67270.6	64179.7	34070.8	61764.6	42722.6	93974.5	13931.4
P31750	14698.7	18939.4	25254.6	30992.7	25605.4	21095.1	24047.4	19548.5	26863.3	12091	9869.52	17278.5	14620.1	17741.1	19899.1	14990.7	18659	29582.3	10824.6	12383.7	14247.3	29404.5
P31786	34527.3	16675.4	41602	170616	51040.9	134166	27419.5	502469	5190856	1.03539e+06	46562.4	54795.1	2.79528e+06	51590.9	58548.8	157756	78649.1	118292	1.48609e+06	1.19716e+06	1.30819e+06	73539.9
P31809	176234	144497	105243	93190.6	92727.8	271308	245535	139549	107181	112039	122691	86501.5	127183	124772	106806	117678	82882.9	68642.1	106741	121374	159713	73317
P31938	33499.1	31755.7	35713.3	30407.5	27150.3	25100.8	31552.6	24070.6	22940.3	34576.1	34173.8	23375.8	27356.7	29139	27126.1	23561.4	24616.7	21410.5	37271.2	36115.6	49699.9	28083.9
P31996	45005.7	13174.3	20474.1	22119.7	11132.2	15397.1	51542.9	28684.4	NA	35617.7	56301	25003.2	40612	28078.6	12152.5	37111	34766.7	21354.8	17800.2	47387	86228.6	32634.1
P32020	170794	188962	173989	155343	184690	142211	143233	145321	287535	220844	154942	168656	189768	216092	174621	198881	189417	202901	274648	236069	290635	218555
P32067	104411	91309.3	84030	96494.2	87317	63939.6	93149.5	92621	90126.3	91937.4	96293	75611.3	88948.8	93835.2	66063.1	89457.9	56337.1	62981.9	92185.1	69684.7	87376.1	63717.3
P32233	28951.8	40013.6	53707.8	54070.6	62330	42146.1	31383	28914.2	89030.1	28823.4	30119.4	30364.5	21558.2	46177.3	39806.1	39899.6	54002.3	48612.1	18673.4	40990.7	33000.7	44437.8
P32261	112639	100706	91480	84579.9	94270.9	82220.9	94214.1	87322.9	90320.8	85548.1	91773.8	88779.2	107516	112844	129504	72361.9	89665	101940	129528	100962	159344	74969
P32507	60995.1	44190.4	68207.7	36289.1	47415	51623.7	40385.1	54280.5	40656.2	31279.7	49591.6	31826.6	39834.8	47497.9	20405.5	55644.1	32072.7	30216.1	50966.4	63304.6	79253.1	30500
P32848	64057	20787.3	24489.9	21122.6	23736.8	30632.5	26965	10385.8	21786.3	16522.1	43700.5	39321.4	43752.7	NA	37259.2	27707.8	37993.8	30386.7	18619.2	30401.2	36753.1	10529.5
P32883	301004	322802	375677	375559	341917	148367	117876	278467	168683	137727	139157	150406	145762	375122	362788	196654	307484	143226	100994	123304	198579	301985
P32921	107213	87541.9	81181	119822	84824.9	87540.6	49879.9	78183.6	78161.7	55641.5	69286.5	49579.3	59974.2	104339	89421.5	71258.5	61266.1	67158.5	69420.4	59610.7	49315.1	81267.5
P33267	222100	219105	292364	179913	272822	182889	151536	101310	114911	129127	108212	149402	100162	148582	119768	132779	218147	166109	151136	107876	106983	187651
P33587	20371.5	24802.7	34543	40147.1	38411.1	37548.5	21980.3	24937	21554.8	23852.4	29578.2	21570.7	28645.5	23967.2	34789.1	24028.4	34616.4	36164.6	15684.3	32282.3	17433.7	29085
P33622	520613	301648	143963	148066	132710	140487	187311	260027	230714	284345	513325	193821	281063	178808	272991	254302	117084	168912	176566	394385	534343	226984
P34022	294024	242152	236073	166106	220665	312558	251541	300003	171440	279174	366717	225689	326110	250823	259350	343243	154638	178555	394480	491554	656703	185418
P34152	50481.8	38980	29315.9	32457.8	31299.4	37587.5	42670.5	41873.7	38380.1	43289.3	49345.4	37251.4	40135.2	29960	23909.6	36473.3	32112.2	30107.7	47584	59709.4	85810.3	31275.8
P34884	167789	119774	73607	87612.9	120080	161901	138314	160726	234068	121082	222568	170930	84137.9	210678	298134	143081	95366.3	145417	148388	190522	260744	104778
P34914	290957	349450	239108	218680	269740	220824	376930	286367	236779	297678	251965	310892	272107	279816	297819	320085	317405	265333	347429	198591	332564	226534
P34927	209856	95542.2	100564	83131.1	71859.4	154479	105804	149258	209480	182069	138623	175247	197256	101149	119848	237123	96169.6	116376	291056	336636	289418	171276
P34928	608542	510188	413023	402253	350164	458411	637922	568939	604164	723113	470389	422759	767496	250106	558463	417723	333580	313232	371189	585030	1.00773e+06	352552
P35123	22930.1	29695.9	31478.7	24220.8	34556	27984.4	28035	22279.5	32074.2	26736.1	25354.4	26453.2	19382	27027	18720.1	25065.8	26784	35960.9	23239.1	29871	28692.6	28187.7
P35235	79207.5	70816.4	66860.4	67160	58935.6	54164.3	74361.6	61885.7	66484.5	85381.4	72470.5	57593.4	65206.1	61687.8	57353.7	70278.5	56577.5	59419.1	83124.9	77952.8	106320	58550.7
P35278	62775.9	58605.8	83978.9	82274.7	94972.7	69422.9	46608.4	76079.1	64352.9	53974.1	66856.3	72156.9	59968.6	94679.8	90099.8	43623.2	79405.6	88763.7	37664.9	78224.3	92485.9	90360.1
P35279	106488	131490	203960	180005	188679	125027	105089	101575	153878	87116.4	86318.9	112682	88467.8	229573	153434	143999	160165	164196	85983.8	135767	72965.4	173774
P35282	9405.41	13451.9	21904.3	24670.4	23086.6	30160.2	11016.3	19257.5	25569.5	15630	10304.2	15202.2	17733.5	23972.9	19490.7	18650.8	24211.6	28349.8	12306.7	19594.7	10161.5	31542.9
P35283	29982.3	16637.5	32693.4	35467.2	27114.6	25452.2	22887.5	26365.9	27980.8	28201.9	23180.2	27431.5	25528.5	31221.5	32590.6	NA	31366.4	32232.8	19565.8	15499.3	9117.89	17140.4
P35290	34884.4	35673.2	65205.6	52276.8	59582.9	50052	24714.6	46313.1	58637.1	33745.3	31484.1	49796.2	17095	54175.3	47030.2	50726.5	60044.1	53999.3	18645.4	37781.7	5169.82	57830.9
P35292	15624.9	24942.7	35070.4	47042.5	35139	23457.6	21880.5	21184.7	26442.5	12593	17926.7	22621.3	17068.3	28894.7	36795.9	25267.8	36663.7	38562.7	7223.87	17622.2	9081.64	37997.6
P35293	67443.2	57285.7	93981.2	66740.6	71342.1	88486.2	71370.8	61410.3	93956.1	96491.2	65917.9	71298.2	43940.8	79599.2	55769.7	60533.8	102178	85411	76809.6	95476.8	100223	76778.7
P35330	24778.8	29618	21318.9	37131.1	22610.7	32438.6	36761.8	25238.1	22605.1	22301	18092.3	19979.2	30526.8	12294.7	14448.2	29682.9	29309.7	29782.9	47063.3	61626.7	82278.6	37418.5
P35441	12841.2	12623.3	11225.5	15458.1	17501.2	7041.27	17157.1	13643.5	28119	8715.44	17388.2	10815.9	32075	29521.1	45282.4	24892.1	17797.6	7638.6	8047.88	16684.9	9391.61	14001.3
P35486	166553	139208	171863	146196	134629	172621	196505	181804	291530	200790	225155	227719	176821	201238	190436	185652	187424	143161	214363	184347	226308	211765
P35487	1.07167e+06	1.06564e+06	1284479	1.13481e+06	1.08261e+06	1.09475e+06	1.36771e+06	1.02062e+06	1.10946e+06	1.14235e+06	1.25771e+06	1.26027e+06	698191	996285	1.1494e+06	699608	898288	1.1361e+06	1.88802e+06	1.28348e+06	1378314	1.51898e+06
P35492	121994	116304	178814	148616	127295	142122	134534	222640	250722	200783	107330	163648	161686	297156	230244	190243	176509	170416	126475	139384	142429	142903
P35505	573451	262972	325018	328784	333619	343818	250067	248942	1.06633e+06	528520	365271	287563	513325	757897	717107	526948	458902	363524	433500	465707	323366	223082
P35550	37533.4	38364.7	67639.2	78449.9	76917.4	57966.2	38603.3	48894.5	50867.5	46570.5	39452.6	47522.8	45895.5	95420.2	69734.2	96875.8	56697	52335.5	26504.2	31665.8	35129.7	60847.7
P35564	261875	136773	78731.5	72948.4	96306.9	235881	92432.3	203207	247101	176475	176056	161742	222041	134397	135928	131827	124181	90047.4	170890	197478	317413	129561
P35569	16799.7	23330.8	12897.8	11738.8	16967.7	10893.6	16989.8	15091.5	236030	8146.2	17770.2	8742.04	13286.7	11146.7	NA	14434.4	12267.8	13741	11650.5	18545.8	21574.3	11275.8
P35576	81299.1	11083.8	21710.4	21564.3	24733	26315.9	11832.9	34048.9	52538.5	21225.4	36284.3	34687.1	43479.1	119138	101701	164140	20021.5	10459.7	15234.6	10527.8	5027.28	15659
P35585	64119.3	72464.1	119634	124121	121736	94716.3	90634.4	79231.4	164593	66389	47462.1	73422.5	56239.7	134463	152462	90655.5	118275	94802.1	62994.8	70576.6	65808	108725
P35700	571630	768435	541335	805777	519329	316515	665802	497322	428636	419062	568779	343261	354745	538980	420705	610402	524309	521543	225834	290552	324311	414906
P35762	67540.1	57361.5	62008.1	61064	69759.6	146474	84352.4	180522	143802	124031	55931.7	70898.7	142339	54597.6	82645.8	63463.6	108994	58464.4	27039	82234.7	77228.5	63215.3
P35821	33981.5	23552.7	37933.1	62595.4	31569.2	42383.5	27981.7	28273.2	42117.9	28699.8	24171.3	47749.3	17012.9	5160.06	33020.7	9443.62	36974	32067.9	34748.6	41671.4	46226.3	33767.1
P35822	34098.5	29605.7	23739.2	23769.9	21156.6	20578.5	30362.2	23494.9	40621.4	26219.8	14526.2	15470	23328	13343.5	15660.4	16884.5	21171.9	17900.8	15863.3	28475.3	46412.3	11774.9
P35831	13936.4	12143.1	11438	8856.3	10096.9	7237.89	4731.21	8547.47	26532	9259.46	11430.9	11120.6	12857.9	11119	10620.6	8721.59	7990.09	8962.45	19451	18971.2	26440.6	6021.87
P35922	1661.32	19685.9	17823.2	16213.1	15602.5	8981.51	21362.9	14002.6	27474.4	38173.5	16318.1	20490.4	10602.5	13963.6	13068.9	15837.1	26503.8	20591.5	11798.8	20778	3929.29	16783.4
P35951	46084.1	49360.3	34790.3	22545.3	29041.5	50268.8	47257.6	38376.7	50303.4	36538.8	65220.8	55687.3	44237.6	52464.9	42094.2	55046.1	34364.7	31340.9	52099.7	72809.1	100588	51321.5
P35979	321368	377365	536666	524741	570018	447305	291286	301892	710013	281805	298932	319731	335110	511108	448643	487040	494931	413242	194253	393250	251607	483001
P35980	288532	191192	436383	502732	488957	407559	167779	332372	703549	525939	148768	280991	334207	556553	492908	295424	497968	435600	150049	600880	344672	586439
P36371	30698.9	20724.2	46057.9	78697	54370.2	26767	41037.4	56895.2	46470.8	37139.3	38490.2	42198.8	14113.3	35973.9	31887.2	23512.2	44291	21351.6	16863.1	28499.3	45003.7	19329.7
P36536	113953	105119	87023.3	93603.2	88328.9	89670.4	113850	60172.7	79923.9	153880	87069.4	81835.8	152062	86840.1	60323.1	97322.8	96709.1	110170	141563	112110	149277	84553
P36552	86309.1	96493	69170.3	84856.6	82325.8	124085	50384.5	110484	76328.1	84130.8	102631	91360	136865	55300.4	121713	105398	93678.9	85576.6	77051.6	99692.9	102479	70747.6
P36916	9436.2	57392.8	64712.2	68868.2	69101.8	59082.1	59228	58670.2	37570.2	49992.7	5959.45	13136.7	48137.9	18627.2	62854.5	16705.3	56554.7	57435.2	6561.28	47299	65691.7	11487.1
P36993	56888.9	75318.6	88044.6	50397.1	38582.6	31529.4	58167.5	38685.8	91253.2	41755.5	81619.8	61811.7	34341.7	80737.3	49738.9	33187.5	27612.9	33013.2	39769.1	55302.4	81596.8	45772.6
P37040	160067	156638	166992	146646	173698	190487	142287	196364	289767	219637	214958	274348	243678	379860	210233	279399	225326	209565	220542	131798	176064	247032
P37804	28272.6	21199.6	180970	21480.7	34247.2	21329.8	51460.9	31406.2	80056.6	33978.7	28093.6	42360	45345.5	56206.2	35857.5	85028	29488	37879.1	86659.5	101907	72098.8	55422.5
P38060	504880	384674	248989	272099	294222	425856	566281	462689	401562	609576	757220	566669	594768	365036	570452	576359	429884	426975	591258	545415	1.04667e+06	354220
P38647	188802	91717.4	64023.2	61632.9	105363	137552	123475	138198	549570	164159	151064	80715.7	192460	78664.3	140894	176648	71178.6	115140	146261	167830	302805	94713.5
P39039	199419	174338	138322	158282	169889	165206	183093	118738	130560	135522	98460.8	95606.6	128913	60501	87578.9	84280.2	141349	110724	194633	120600	175770	125415
P39054	37710.2	46594.1	57791.7	64769.9	64510	39179.5	49765.8	43296.7	36597.3	41163.3	40792.5	37204.3	34596.6	52375.5	51967.3	53225.6	57773.7	47736.5	38974.5	41880.4	30247.2	61837.2
P39061	68714.3	61258.2	53646.3	56584.5	46334.4	77980.3	81381.5	79309.8	83006.1	94962.5	76524.9	77594	73971.3	44225.9	45982.2	70349.5	89354.5	61991.3	115303	113797	118179	73477.3
P39098	27826.5	30465.8	26704.1	32377.9	27549.1	26372.8	26997.7	24167.6	39648.7	27395.6	30053.2	47591.5	21277.4	55013.2	23662	40576	23968.3	26631.2	42185.1	33928	43467	30063.7
P39447	48695.6	51128.2	41844.9	41823.5	36551.8	36135.6	48497.5	45694.6	45989.1	46908.2	53782.6	40028.5	49545.8	36624.4	36932.1	45094.3	33282	40530.5	53250.7	57133.2	77249.8	38463.5
P40124	96838.9	67859.8	82553.7	91256.7	70442.7	90602.5	107002	87716.7	181132	100734	68273.5	79862	72155.5	96530.9	99632.6	94969.9	104207	83292.1	87188.1	72813.7	134785	121869
P40142	172323	149349	234023	315131	253202	165886	179807	207546	421930	163668	187334	210015	240388	256402	268719	307253	256724	284741	111991	200825	144894	243547
P40224	43668.5	38941.8	30244.9	34301.5	23676.5	NA	46738.1	49572.9	32880.1	26714.3	70358.5	NA	38843.6	NA	26424	NA	45224.9	38731.2	65233.2	66320.4	48861.4	38080.2
P40237	102566	76962.1	77678.7	71369	84531.4	178374	124378	146571	78788	107212	106294	109573	122854	88573.6	75345.3	105436	76136.2	61212.7	60736.1	116680	175604	65431
P40240	92839	35323.1	59378.9	48522.9	50046.7	43254	40389.4	115498	NA	102238	35108.1	37681	63075	46623.9	64849.7	64721.5	33751.3	29391.2	39665.1	53810.3	85670.5	49231
P40336	27648.6	28384.9	52293.1	54859.5	54014.5	43433	37491.6	39132.6	67725.6	29337	29356.9	34808.4	42839.7	53821.8	58251.4	42219.2	61343.6	55330.5	18822	36818	20393.7	60316.1
P40630	327860	266741	168138	168163	118503	205750	280853	198337	154493	128352	164050	149648	225603	147599	154719	181536	169518	181029	215493	162499	303870	192239
P40935	21956.6	13567.4	53823.7	21330.1	539813	615476	129316	343578	796544	357930	35808.7	63314.9	738633	433223	255482	359830	61756.7	22942.7	42468.3	80569.9	484678	1.55792e+06
P40936	226730	146395	200181	167891	189288	194543	93303.3	162178	146141	169705	94758.6	108028	92572.1	93387.3	131567	80724.2	120413	131978	112158	128753	288070	156485
P41105	198314	12716.1	5290	36879.1	20084.3	50797.9	2925	52082.2	842432	114026	153757	6923.17	61265.1	6729.87	24507.2	16629.4	15257.6	30118.5	16003.4	66123.9	38136.2	2000.14
P41216	151851	175830	245143	255303	316193	268639	128026	264371	299089	155927	110090	166651	236982	249621	263690	140694	234388	276541	93615.2	208934	108976	221645
P41233	12865.4	7743.37	5411.88	6680.97	8953.3	5732.77	18062.3	7223.25	23906.9	38087.4	24191.5	11351.1	9120.63	20929.8	4278.58	6005.52	9058.59	6560.27	16084.9	2781.8	34188.3	2295.01
P41241	73725.1	76764.2	108411	124348	117875	87149	64616.2	88998.1	109385	40090.6	61525.2	130713	36589.9	105660	51556.1	76127.5	117982	160132	22187.4	68235.5	97052.4	88986
P41317	155947	122330	74740.2	125203	99534.2	136355	137230	132364	179484	178411	100818	71034.3	142611	51112	56700.4	54852.4	79502.1	79357.9	118620	163870	321792	79811.6
P41731	15472	12681	18493.3	13791.2	11847.3	13012.4	35828.7	26546.5	33463.6	36370.2	33077.8	28170	23664.6	36120.5	22619.6	40224.9	20871.6	21541.6	29607.3	45641.3	76187	26936.6
P42125	204908	155248	148845	164755	184237	168765	181906	230916	605424	198258	89465.5	238022	256820	278318	246463	191357	157218	158000	175556	107536	228602	128405
P42208	92693.5	95926.1	119525	125707	127515	114540	100007	126249	100014	125732	81928.6	103182	90129.2	131399	99961	95575.6	103247	96930.3	79520.3	103485	112957	110616
P42225	78731	66901.7	68532.7	141324	69510	70705.2	51553.6	82471.9	63891.1	87436.3	43606.9	50089.7	66851.6	54878.6	49180.6	48820	39987.8	58668.1	88740.6	57715.6	129049	74824.8
P42227	31851.7	25981.7	25567.2	31789.6	25598.8	24191.7	33692.7	31631.6	42093.3	31569.1	28238.5	31151.9	39607.9	35955.7	37439.1	24051.8	27876.1	27087.5	41520.8	34994.3	47242.3	34761.4
P42230	8588.65	8707	16992.1	14105.4	18371.3	22469.2	5625.83	16215.2	NA	16596.8	710.996	NA	21682.7	7358.86	16855.7	7300.76	11172.6	8206.13	1326.35	13227.4	1686.13	12144.2
P42232	28263.2	32280.9	39415.1	31943.7	30505.8	28832.6	30524.1	38511.2	29741.9	32267.3	20654.5	32714.9	25435.1	22709.6	37445.8	26316.2	31053.4	46957.7	48084.7	25617.3	46115.2	24092
P42337	4095.1	15905.8	13221.8	18211.1	13863.3	6371.64	9897.8	5441.32	11568.5	NA	3676.63	3926.56	7636.93	7971.94	9211.12	3841.62	8482.4	13992.2	3080.7	NA	2955.01	11422.4
P42567	49411.4	47557.2	45771	49331.3	49718.4	49334.5	40714.5	45849.2	39233.7	33509	58171	41287	42012.1	54181.3	40561	46602.6	44963.6	42208.3	40168.4	49610.3	50764.9	39840.4
P42669	340809	230583	245761	194455	236892	260671	234158	261637	199507	319821	226956	230804	228044	192937	171276	202087	201494	161546	209605	152574	325430	160750
P42703	41309.8	32418.4	24458.4	23710.5	41560.1	38704.2	37477.2	65646	47882.3	34465.7	25830.4	23606	54678.8	20100.3	22302.1	62557.1	18564.6	21085.2	29789.2	63645.5	86133.7	60068.9
P42859	4215.22	5959.31	8530.37	5273.59	11236.1	7530.67	5229.45	5672.53	8202.45	6041.01	3074.25	5574.55	4056.76	7664.69	6228.79	7670.15	6745.55	12360.7	5569.87	9469.57	4481.31	8495.52
P42925	71443.8	75628	193624	92057.1	227891	219893	111398	156373	83571.8	153609	42695.4	84213.6	142041	202793	117878	72477.2	314279	174536	67534.4	126540	120314	194231
P42932	189305	174354	165345	149354	159846	163343	157271	186477	131666	183748	170744	158870	167467	178947	171307	212625	152916	170149	160193	190084	149446	184732
P43006	18170.2	14312	23236.2	34314.6	20800.7	16478.7	15388.6	11242.2	49972	10642.6	12384	17128.8	21855	21312.6	37536.1	35555	9885.94	22760.8	12073.4	12255.8	10631.4	16211.8
P43024	221368	202366	194317	139420	157102	257764	240081	171170	194082	288472	214245	199449	268598	218232	187804	255876	151434	148195	424522	344468	513691	175780
P43025	65289.6	42919.3	40321.1	32025.2	47091.8	42867.6	49999.1	43231.8	34261	57289.5	36517.9	32402	52182.6	44314.6	31648.5	42471.7	28080.7	23585	20018.6	32747.4	54900.1	34223
P43120	8132.44	7163.85	7779.06	NA	10667.8	4307.6	8726.64	NA	NA	4549.13	NA	NA	NA	NA	NA	7983.21	NA	6343.91	8897.69	11448.3	18159.9	NA
P43247	11646.7	18286.3	14241.3	25147.2	17290.9	12460.9	19720.8	12203.6	15822.8	12057.2	12909.1	11002.5	11707.8	10158.4	12690.1	15386.3	17545.1	19460.9	12444.4	19388.8	18156.8	20363.6
P43274	2080255	2.65051e+06	2.03657e+06	2.12804e+06	2.26495e+06	2657463	2976536	2.32914e+06	3.22567e+06	2.25916e+06	2.77513e+06	2.09486e+06	2.43736e+06	2.40143e+06	1557158	2.55753e+06	1.47169e+06	1.89027e+06	1.25801e+06	2.86411e+06	1.92307e+06	1.11244e+06
P43275	132396	106615	107213	138596	91421.9	79359.8	82982.7	58263.6	162275	2.90825e+06	1.17516e+06	80466.2	240766	85265.9	46376.2	64691.5	417580	39805.9	1.49242e+06	3.1309e+06	91409.7	89903.6
P43276	418066	311889	305267	434653	270236	332167	130175	103847	198200	171764	146243	80075	111504	197882	103945	174374	140808	92054.8	66646	139636	158517	105689
P43277	542253	110189	437961	422327	554093	534360	506945	439440	973441	381237	336467	497250	439391	441972	601481	425420	588478	539001	304564	365319	342616	352901
P43406	51629.8	31777	36930.5	27213.2	27901	55301.4	33994.6	64523.2	54567.9	52428	34034.4	59895.5	35970.2	35938.4	29074.8	46315.6	47265.7	33953.6	49668.6	53151.7	72228.9	46401.1
P43883	120672	60358.9	69227.6	57426.8	54624.4	43403.4	106692	129050	163982	99762.6	48177.9	71206.3	140628	83114.4	85086.7	80541.2	155852	103105	300902	267749	188766	76974.4
P45376	102066	71367.9	172135	159492	124755	72494.4	111931	80432.9	171646	122314	168303	96670.1	110560	250175	175621	134304	106988	125807	75810.9	87585.5	68317.9	111619
P45377	53101.4	37078.3	38395.5	36023	29576.1	19387.6	40523	27700.3	43224.8	24484.3	34775.8	35170	79069.8	47113.8	67155.9	27529	28126.9	31500.4	36417	18530.7	53916	31663.8
P45591	235648	224751	214689	153844	178099	206732	225387	227789	206016	230259	234054	233869	259785	231769	242127	193573	208725	149900	269324	157242	209792	179983
P45700	28255.7	39168.6	45206.8	54888	59773.1	39457.8	30947.5	38165.2	40119.5	29014.3	18871.1	30915.1	46029.1	32863.9	33270	34798.1	50104.3	36347.2	24017.7	39335.8	35463.7	30720.5
P45878	217107	198084	230530	261306	241564	140873	262525	100790	269557	134213	249351	208519	147793	277955	273040	364179	155945	187643	300913	136710	151772	283565
P45952	504293	446273	332828	367066	486583	307845	363064	472555	891613	271719	473066	489225	508679	918672	981094	871501	557175	552659	388578	542270	291339	487036
P46061	69980.2	72808.5	41513.5	50084.7	62374.2	70137.1	61903.3	61667.5	56132.8	65533.6	71581.6	48452.2	78548.1	33269.8	38428.1	69239.4	41876.9	41781.4	72803.1	91521.7	124067	50083.7
P46412	105274	80004.6	100266	86944.6	97016.2	96905.1	92557.3	91555.9	82508.3	72888.8	117472	94535.8	171008	328208	190727	254436	49305.1	77499.5	85864.7	93815.9	82034.7	81763.1
P46414	46057	9388.52	25537.9	6261.98	6945.52	10111.1	10992.8	8744.12	47863.9	10344	35396.3	31151.8	5070.35	12162.5	9726.37	15412.4	4852.28	5026	10704.2	11555.7	11367.9	17348.5
P46460	58245.4	70793.9	75632.9	76946.7	72924.9	51051.3	72377.5	53075.9	67674.2	42921	49361.5	53800.5	53422.5	65922	60014.6	50711.6	62176.9	54677.9	45331.2	37805.3	41616.8	66618.9
P46467	72208.4	61341.2	44350.1	47978.4	39833.4	86174.4	67033.4	57466.2	60741.1	82228.7	56892.2	60157.5	55049.6	41281.6	40626.2	38962.5	43435.9	46077.7	72761.9	102171	116312	53487.1
P46471	113307	140077	142000	147997	151942	128037	98118.6	143325	242333	153962	130422	142358	138951	142094	133004	108033	180103	148435	228505	171732	134251	229120
P46638	443580	387673	437592	302289	337086	467850	495526	465756	347212	489603	466335	452204	533311	379778	323241	297468	457051	324571	612266	429491	530098	342471
P46656	998217	612613	469953	425352	531974	603397	507953	558980	250299	560581	746478	497095	510882	448906	373855	481729	371265	397936	721288	778695	1.15933e+06	344314
P46662	16401.7	49153.1	235381	75338.4	222438	63179	57961.9	27106.9	63639.1	28034.9	23832.8	96148.3	90511.5	153906	57672.7	NA	178905	56888.1	11036.9	47373.8	36111.4	90377.1
P46664	142953	125115	125779	112780	114186	113663	104988	161959	132220	127158	113814	114482	126387	130218	121372	147402	139590	125318	156103	137925	170609	114841
P46718	27849.3	28169.7	40621	14156.2	18905.1	12797.5	17606.9	19694.1	49577.5	19560.7	22536.4	37104.5	18614.2	24132.5	22551.6	29734.6	17074.4	22501.3	35965.7	39118.5	50658.7	11700.8
P46735	31808.5	38928.3	56488.9	57673.3	56675.3	48574.5	38808.3	45135.6	54184.9	50231.3	63824.8	57805.5	45242.6	93771	79775.2	87682.6	59071.6	56986.8	29946.4	47772.5	40368.6	52933
P46737	1633.43	10377.8	6470.26	8852.48	6499.97	3357.19	2760.11	4026.56	NA	6088.19	5701.08	6679.12	7152.38	6898.46	4754.94	9902.77	5887.92	8794.96	1327.44	4242.65	3816.37	2522.82
P46935	44539	42355.1	64573.1	45040	43146.4	55673.2	48892.9	51231.8	110137	38283.5	36240	43531.4	43102.6	71782.7	51069.2	40828.2	54663.4	61836.3	63376	65294.7	77013.3	62295.9
P46938	49129.6	28904	30618.5	34790.9	22501.2	27484.8	33878.1	48303.3	38966.8	41196.4	44563.7	41614.5	35315	15228.2	51990.5	39478.9	30974.2	18645.5	56824.2	64398	89659.2	22423.9
P46978	44074.1	60759.6	45745.8	48163.4	61646.8	37848.7	46581	27437.1	152325	70177.7	56851.6	85071	68192.7	36397.7	83315.3	82708.9	41536.5	33956.6	58608.7	74887.1	47332	47100.8
P47199	316982	304871	319928	359558	334369	335846	307231	356945	412022	211814	271971	317876	193505	374278	288595	226719	301875	238786	178883	277646	189416	293248
P47738	409808	267187	248436	243754	256997	261004	325127	227043	241544	255784	363378	238088	435638	479210	294931	475345	212027	272955	247180	240893	300165	251554
P47740	289432	217396	203137	203741	257332	130126	266829	223635	482616	263404	201979	322326	280031	258515	304841	200824	335895	390183	180802	206109	276611	279413
P47753	66676.6	68338.3	84489.6	86066.8	76382.1	64016.5	76752.2	107436	77624.1	109433	59400.6	94445.1	128175	100957	98078.9	48086.3	71876.2	65817.8	56324.1	57220.8	86328.2	95907.4
P47754	57612.4	62147.8	115007	89227.6	93098.4	63883.1	68052.6	69382.4	193007	65447.2	67180.2	90229.6	111752	128222	102545	85299.3	82157.4	90962.3	66375	60351.6	50143.9	90845.6
P47757	111868	129800	99846.5	154381	144746	172896	124756	150472	121862	153315	89322.3	148966	126567	132313	139426	106947	167428	98485.9	57283.2	102666	108578	117750
P47758	51740.7	63350.8	86515.3	67560.2	71998.7	69347.6	31350.6	36897.3	66470.8	52784	52284	49291.1	59291.9	39155.8	74607.4	63957.6	65550.3	32429.2	43260.9	33391.4	32346.3	71950.6
P47791	95996.6	153550	218028	226565	232189	173054	114708	155721	257338	130928	127975	138843	121356	240899	213538	186923	232768	204388	62733.8	162622	88635	177772
P47802	68668.7	67446.6	48612.9	48286.9	59063.9	36527.9	67348.1	46600.1	72320.1	38057.5	81140.4	49003.4	101437	58872.2	102918	79919.5	55915.9	45685.7	42446.5	114144	79612.6	41213.1
P47809	25692.8	20940.3	23219.4	23638.5	18630.1	23491.2	21415.4	31726.7	25915.6	23865.5	21428	23407.8	17357.5	37128.1	19633.3	26713.3	34347.4	18524.5	22626.2	31608.9	29680	28595.4
P47811	27096.5	36982.4	24498.3	22205.6	29285.9	35620.4	42968.7	34996.5	24896.7	39115	20786.9	28871.2	37275.1	14212.2	22391	15388.8	25457.3	22408.4	41801.5	43532.7	62506.4	24794
P47856	27461.7	26183.7	36863.2	33116.2	30406.3	33768.5	27614.3	27279.4	30679	32304.5	18116.7	26530.6	22041	32536.6	19834.7	29692.7	34921	34956.1	32282.9	39151.4	36683.7	36386.5
P47857	16429.1	22039.5	35277.8	35978.9	38229.9	27043.1	23979.6	28643	46406.9	14663.5	27482.5	27662.7	16143.5	35502.7	42809.8	32060.3	20658.4	29295	25344.5	14992.3	22367.7	22094.2
P47877	22358.1	23125.3	22742.8	27953	21852.1	23713.9	25877.8	17102.8	18235.7	29380.2	33246.3	29302.7	16986.1	49412	30108.1	39797.3	21781.1	25106.4	20450.1	41474.1	57071.1	23480.6
P47879	32706.4	41858.7	30829.8	31401.2	20160.4	45561.4	67338.8	72900.1	37441.4	64268.6	43766.8	38585.4	66369.6	13025.5	36683.1	48285.5	29450.1	26776.2	44875.9	77028.8	95633.6	27977.1
P47911	234524	153953	236789	320725	320414	219725	126682	213750	279464	246836	129399	111161	185731	227191	235917	151095	291959	340262	102968	255526	162902	276163
P47915	6245.52	6146.23	4294.48	NA	NA	NA	NA	NA	4537336	NA	4555.16	6763.66	NA	NA	NA	7355.58	4559.5	11996.7	NA	8811.57	NA	14480.1
P47934	28211.7	37109	46210.9	44864.4	31986	42604.3	45981.7	43905.1	76184.9	41291.2	52788.7	47161.2	45299.5	56751.7	105824	78743.6	73973	83421.1	19433.4	70030.9	48188.5	66928.6
P47941	122671	112408	105367	76812.8	77725.8	127926	127433	109579	118982	127482	118945	111506	135805	91483.2	69845.8	109251	98396.1	97002.5	197200	210373	258855	97755.7
P47955	1.07555e+06	715734	492671	347876	489999	1.0035e+06	621890	1.01621e+06	800889	1.29824e+06	918145	892836	1.13989e+06	792269	502846	798704	786104	548844	1.3747e+06	2.48855e+06	2.71393e+06	562181
P47962	173305	58727	136278	104177	139379	138105	100720	110052	821916	144102	67874.2	145693	125337	82607.6	119568	127020	143533	132922	117364	118608	110582	129607
P47963	166662	229346	489888	466675	520479	504139	193041	391658	461754	368678	170989	338634	222314	462318	322481	170900	658356	440198	244611	333291	495519	441540
P47964	124817	111197	128561	125042	124653	125455	76566.4	102957	259813	101739	138641	91255.4	95314.2	141228	101670	142351	114521	122071	99718	109699	115564	142545
P47968	19289.9	15728.6	37085.1	21430.6	26508.1	23277.6	19224.1	21098	23277.1	14098.9	18042.1	11690.3	22410.3	26219.8	25634.9	18076.2	27409.3	26400.2	22528.9	21239.7	NA	27831.4
P48024	76136.6	35522.4	98880.8	19233.6	19858.8	52634.4	219754	43208.4	127980	38098.3	38099.5	131089	61062.9	22457.3	36075.4	61750.1	26987.2	26548.9	50038.7	71974.6	77823.6	22308.4
P48036	323351	212228	133767	139771	82347.3	310187	234579	283767	359826	514594	162315	268015	526877	141451	231482	218312	234212	203604	147393	193111	750238	223875
P48193	31240.8	57096.8	55632	56923.7	67491.7	59640.4	50696.1	62154	66878.9	60186.1	52979	57072.7	85186.8	107855	88860.1	77089.1	60566.4	52208.5	39933.8	60429.4	51014.7	46602.5
P48410	6222.01	10023.5	18604.2	15975.5	14365.2	14387.8	12113.5	18325	22576.6	25211.7	4950.43	13571.4	14677.6	10947.7	16275.2	9188.14	30351.7	24788.4	12621.9	20218	11718.8	34345.4
P48428	185150	151806	117203	108181	119513	135562	169541	122643	146874	126712	177360	123808	150899	116197	108574	144720	147927	136087	178684	176856	153151	114399
P48437	11821.4	11188.7	4776.22	7879.71	10821.8	6348.25	12401.1	10547.3	5674.86	9498.37	19082.8	22368.4	13143.2	5716.65	15791.4	10120.7	16250.4	7595.64	15968.6	14075.3	11210.2	3800.51
P48678	26759.2	22193.9	20981	22485.6	22875.2	25716.6	29587.5	26322	31143.7	46089.1	53570.8	38760.3	29835.9	33613.5	26964.4	31910.4	16540.9	20144.3	21900.9	28873.2	33131.2	27726.3
P48722	28749.8	29590.5	46779.8	51690.3	61756.2	26510	34508.6	34587.6	76924.5	27252.6	29066.2	22903.7	28214.2	35808.6	47932.2	25639.6	42657.9	37849.6	25631	28703.8	27695.7	38012.2
P48758	903025	830724	690782	735247	684865	937267	803613	1052453	877826	1.32916e+06	1.07521e+06	848635	1.51073e+06	604623	1.13777e+06	648148	758925	721325	1.82241e+06	1610202	2.28723e+06	950500
P48760	20448.5	22267.9	34946.4	23380.9	25430.4	28138.6	21643.2	29256.2	33831.3	28054.9	17836.7	21666.8	14675.9	48558.5	25236.3	34296.2	62445.1	47043.2	27677.7	17245.3	NA	40964.6
P48771	499126	398800	378833	292409	292821	516334	499958	468203	287888	458670	440471	442906	466989	418568	330783	384660	302720	274520	499325	460546	966969	324773
P48774	32465	34108.7	42056.5	29146	44339.9	29882.4	33817.5	34060.8	52781.5	38669.6	35223.9	39830.7	27850.3	29982.9	41929	40297.4	36560.1	32261.5	38913.6	35610.1	27606.5	48804.8
P48776	48854.1	68625.2	86188.7	76309.5	116356	106086	39735.4	71467.2	51088	73828.9	63140.2	103270	85067.7	257230	137596	146128	52668.2	70527.4	29776.6	78053	44383.8	55882.3
P48962	41165.2	63472.5	154832	115094	97247.1	128992	72078.3	134437	111301	129326	227067	73987.2	81838.6	118127	86933.5	95372.6	112939	92156.3	85154.9	104146	123680	106774
P49138	48941.8	12706.5	10033.1	21326.7	9935.21	10024.6	13445.7	16553.5	13436.6	18857.2	16948.5	9135.08	21380.8	72490.6	16896.5	11583.1	15276	16616	33798.9	22375.6	21404.5	23012
P49182	40348.1	45764	59745	58975.6	57594.5	56913.8	46805.1	54189.5	60093.1	57241.2	44070.2	53940.5	59236.6	52658.2	68070.7	66252.9	64901	53349	23475	51853	41235.1	61733.4
P49222	36820	8751.07	18964.2	12777.7	29003.2	23299.4	28755.7	33280.1	84443	20823.3	42802.7	32654.3	34546.2	12912.1	29206.8	7115.24	28868.5	29582.9	30937.4	31209.4	15377.5	10627.4
P49312	32739.4	39980.3	46345.6	56273.9	51524.9	48647.1	43781.5	29159.7	45703.6	58413.5	41189.3	48065.6	57063.3	52338.4	54987.1	76630.2	45417.2	54735.6	19897.6	43510.1	26612.1	35505.2
P49429	158366	216255	252041	164439	292122	195394	211845	273760	231883	412498	236663	244544	279380	195931	231312	159174	280513	188829	139425	146119	229335	223642
P49442	50996.8	52834	81406.3	81154.1	62679.3	55270	46611	44069.2	69387.9	42471.2	41452.4	39842.5	60935.5	71251.6	75085	61657.8	48972.1	64453.8	32986.3	39742.8	24902	48971.7
P49443	157031	115563	80168	100153	79116.1	82053.7	130096	158435	170744	151218	157300	143746	202622	85598.3	118631	96078.6	118577	88981.8	187746	187215	279939	106716
P49586	72786.6	84692.6	48979	48744.8	39465.5	63383.3	77568.9	62839.8	75066.1	72470.6	88478.9	66986.2	82256.9	64878.5	60229.6	59959.5	65326.7	71840.2	95917.1	113195	155108	64863.2
P49615	31421.3	42033.8	45627.1	55430.9	55341.8	32578.7	39205.4	35021.9	32556.8	33155.4	25978.5	29694.9	38672.5	35968.6	38972.2	40338.2	34830.5	42498	31216.3	36772.4	26058.2	42104.2
P49698	63764.5	74979.5	67751.8	72778	73351.5	58947.1	112368	108112	76447.4	99392.8	101059	122796	79139	105463	95871.4	114135	88593.9	79635.5	127602	107832	81125.2	89086.5
P49710	30403.3	14421.3	8680.84	24623	15333.5	28336.5	19886.8	22690	18230.9	28362	17567.4	13738.7	26805.1	12954.1	18026.4	27857.1	15380.6	17995.9	26273.2	26135.2	68678.6	14588.5
P49722	289591	276879	280081	331904	318060	223145	293845	289644	279323	317505	250648	328064	263531	239885	225197	289497	259399	258541	238390	198146	273235	284881
P49891	213292	20003.5	12267.8	3338.42	3451.33	8373.68	13552.9	25604.7	35349.6	50484.3	198971	129352	161550	128026	30751.6	248340	35665.4	46039	27611.9	31645.9	36990.3	30013.4
P49935	137667	85131.3	100074	108423	58614.6	126302	122800	154532	202264	124579	152947	167247	164548	87850.6	149083	200381	51851.8	81756.7	96433.8	86821.9	166201	85489.2
P49962	113274	125146	190277	169322	188398	159066	112522	148327	168628	127350	88359.4	107833	79544	121285	126131	94112.3	156052	125986	64327.6	113590	78148.4	148953
P50136	226978	212553	211246	180349	206379	165266	214280	120663	232392	151210	263574	196221	172848	201873	277558	169176	150077	174810	192108	122232	168394	137989
P50171	203437	134151	160399	176157	193975	115406	116342	146746	209631	186882	232930	241761	215032	204767	300794	223518	152408	161773	189886	148934	139210	198311
P50172	400696	82189	222952	164764	177146	802569	119753	643401	1.33739e+06	336381	85119.1	409733	531568	870141	1.09161e+06	499382	645843	184469	281522	428338	297994	273984
P50236	18933.1	21506.4	15110.1	36869.1	7391.87	37400.8	147715	119416	42870.4	81944.7	176923	46302.8	153232	130332	203708	48842	86027	80620.7	140038	126717	124335	48755.9
P50247	366863	320870	533242	451209	568856	343778	271760	310678	563718	434053	325578	358444	288907	811070	585253	483932	379177	499178	300382	260838	238502	332409
P50285	44401	57377.3	113120	87560.5	108752	104694	60655.7	82560.6	74800.8	74062.5	32124.1	57169.3	52357.9	57655.7	93963.4	50116.4	102282	72652.1	30598.6	57717.4	43439.6	75252.9
P50295	58024.4	73562.7	92368.6	101183	98728.5	75571.6	56747.9	66072.5	90069.3	81420.2	60095.2	82776.5	70775.7	101682	92289.1	83202.1	113801	84538	21235.4	49135.2	39240.6	95023.2
P50396	41281.2	39167.3	51716.7	56825.8	48404.7	53221.8	40098.2	46325	56662.5	50030.9	44864.1	41928.9	43967.6	58741.1	57779.4	63967.2	52445.4	48850.1	32990.7	34685.7	32760.5	46194.4
P50427	47905.1	38110.2	49395.3	56056.9	69151.9	83659.9	39681.6	84992.6	69185.3	58260.7	34726.9	47946.3	50501.3	98688.3	71318.7	52726.6	62259.2	37798.3	27485	42858.4	37424.1	57080.6
P50428	15399.4	9320.62	7317.46	12177.6	11538.4	8473.83	15653.4	15505	11844.8	16112.7	22800.6	20922	16914.4	20515.6	10734.6	17044.5	9691.08	6722.4	18680	19541.2	22282.5	22281
P50429	121062	108591	126154	142698	147803	150662	122464	195270	149781	120968	128437	151736	118817	108328	159086	130794	126861	110428	133674	133862	162931	132611
P50431	129027	142982	213010	111206	204699	168665	128683	148712	337129	154817	117575	125135	127703	141347	123173	191069	173397	115451	75343.4	134935	127736	133348
P50462	86963.6	73009	121679	62360.3	73662.8	59217.4	51382.8	58633.8	99062.9	62033.6	63555.2	33724.6	32188.2	7285.38	34601.9	23548.1	41680.5	38570.8	32415	43003.6	51807.6	39818.2
P50516	107140	94997.2	100903	112672	97539.8	103104	109672	108784	81827.8	121878	117831	124232	123700	153231	111039	136533	108052	94815.7	140821	76027.3	95169.9	119798
P50518	160347	139418	120994	134517	103819	115860	154282	94808.5	148970	60029.1	151098	139856	182692	121952	102850	94558.9	71924.7	113400	180504	219678	127602	97661.5
P50543	36344.9	192335	206660	210455	20014.9	201915	270849	41454	56572.8	111447	43384.3	63172.1	307053	183279	167355	314279	43121.8	44840.6	33686.3	63668.3	173136	250415
P50544	314894	313388	272017	316641	293667	293269	353368	300370	266845	297191	428557	356857	477756	427336	498779	476234	351249	265722	371812	258717	278122	274151
P50580	123688	98163.5	127695	118242	126721	123037	77368.2	92375.5	166363	109392	96130.2	101852	70900.4	128474	122582	104983	110463	105556	71818	71360.7	86644.9	96821.1
P51125	71027.1	48655.1	50615.9	28715.4	36352.7	35959.1	45272.8	35817	88581	42182.1	53057	34311.5	50904.5	36603.7	30030.9	42392.7	42218.4	33940.8	71997.9	76878.7	106683	36781.6
P51150	199443	236536	392825	370524	359070	338036	217448	291700	351657	251249	203908	253584	221487	412871	378199	252325	365132	345921	181806	272897	192273	345758
P51163	58562.7	54665.5	24170.3	44585.7	28582.8	53337	50395.2	55479.2	90604.1	78789.6	32078.4	39116.8	82964.5	39339.3	36990.5	46273.7	35757.7	40249.6	81079.1	79219.8	130270	36845.4
P51174	139103	85682.2	104319	128422	104710	93860.8	92986.5	113628	126992	95551.3	145477	133114	243143	152511	170707	144158	131437	112968	154149	132023	278478	103771
P51175	41426.7	30214.5	37957	45021.9	34370.3	41563.6	36508.3	29019	44798.2	38934.1	33296.7	28863.7	27322.1	52736.4	61698.7	62511.9	29871	36350	30708.4	42546.8	38852.4	36635.1
P51410	99718.3	48221.3	101920	103096	111545	106220	32365.9	51391	34483.4	65297.2	77838.1	52823.3	51005.9	103760	72745.4	83510.4	154255	89440.2	59923.2	117846	61049.4	103108
P51432	18994	18278.3	18398	17316.9	14941.1	16045.6	22620.5	16508.1	18173	22889.9	19300.1	18677.9	16892.3	14709.8	15169.5	18817.8	15217.5	18782.5	27073.3	21420.4	37032.8	19233.7
P51437	85035.1	8071.24	57975.5	29128.8	NA	3554.81	144076	57539.5	89067.1	78403	63239.1	132170	80516.6	87150.7	96009.7	109135	89943.5	45034.4	131521	74661.4	158047	50607
P51569	51147.3	43996.7	43416.8	38133.7	42849.1	32870.5	54428.9	44342.3	64827.9	51940.3	85440.2	64476.4	38654.9	57329.5	62218.5	60550	52505.7	49100.1	62591.7	41762.2	96707	47394
P51655	28011.7	17457	29695.7	11949	22034.5	4999.1	26219.8	10709.4	24101	34406.8	21070.2	10833.8	44659.8	22059.8	54097.8	24342.1	15973.6	17742.3	21405	26376.5	56237.4	14462.4
P51658	123257	167624	223539	237857	269656	178208	93825.6	112564	61389.5	80673.4	34413.7	63600.1	69512.6	52843.4	57338.2	63776.2	144048	106404	68678.4	74545.6	80674.3	119500
P51660	84336.4	88640.3	108207	120255	108935	121719	88627.1	107635	154286	118446	120204	136989	78860.3	154038	174922	102837	159593	131359	90400	135040	104373	157326
P51855	136659	110599	131811	157758	121735	97743.6	110221	86604.2	75930.2	71627.9	178612	113453	105125	220720	134723	217845	85616.7	120331	105473	52791	52385.4	96870.1
P51859	157690	178410	126333	76578.9	142737	296475	186834	121717	575202	139944	488717	140134	156718	124591	121804	199503	130587	106883	112332	170005	236315	102304
P51863	85152.4	123485	155932	169589	107058	116267	108026	113182	98992.2	94029.2	131499	93355.7	73358.6	204863	229173	238042	148293	146214	78383	143214	52246.4	153701
P51880	10994.4	6884.97	8694.96	19209.5	5094.69	13025.5	11387.7	9178.35	17670.7	14263.5	18019.4	13102.5	5183.14	9779.68	9200.15	7899.99	8090.16	10544.9	6646.55	11276.3	17569.2	11182.7
P51881	290925	159871	268806	280263	364633	401466	148183	190067	159136	175106	217006	139872	181187	542146	404212	375536	527174	477761	126342	330504	181052	341694
P51885	85769.3	101729	133358	78272.2	136378	99534.3	78260.2	109124	125172	314003	173099	82959.1	95480.9	167394	124568	221744	59055.3	68474.7	90858.3	150790	113872	99476.3
P51910	40501.7	47239.1	62952.5	37173.8	63513.4	61290.3	60435.8	43390.7	163603	31272.3	62280.2	74848.4	64478.1	166698	133142	127684	34959.9	49879	15661.7	54769.5	38204.7	49909.6
P51949	9251.04	9945.92	2614.15	4058.25	5347.94	5486.92	6181.05	6105.56	4584.64	8208.87	9469.09	4623.46	NA	4287.19	4648.21	7226.24	NA	4422.66	4290.16	6338.25	9860.8	4064.97
P52019	13230	24498.8	33859.1	35772.5	38836.4	38469.6	17930.5	23751.8	10923.8	29208.2	24467.9	23536.6	20973.2	15851.8	23550.2	16458.9	60509.9	67251.5	27493.9	55756.1	25820.9	36030.4
P52196	394287	200274	153530	166377	192401	319851	167901	251807	163091	318658	231368	157097	359184	156601	208603	217037	178846	179557	171530	165956	268280	177370
P52293	35181.9	33218.5	22854.8	21246.6	17252.4	26730	24513.5	20666.8	15863.9	24818	20763.7	18820.1	21105.2	11176.8	21109.7	22606.7	12666.7	18995.8	45658.1	58634.3	64979.7	18072.9
P52332	17357.2	36336.8	62854.6	74445.4	65385.1	43329.8	41461.9	47196	77367.3	25405.6	26695.2	26994	15823.9	66131	27657.9	67339.8	47692.2	51145.7	11426.9	27728.1	20998.3	58903.8
P52430	134504	163124	118815	141310	147336	108006	92230.1	69835.5	107843	77223.6	96124.5	122656	63592.8	118299	97050.2	107390	133109	137407	46331.7	102714	84917.4	138609
P52479	39648.8	46511.4	43670.5	43018.4	69335.2	40100.9	24262.6	36845.8	49011.2	45962.7	42910.8	33285.8	36141.6	52376.7	75186.2	73694.8	47358.1	48284.9	36703.8	83420	49615.1	53203.1
P52480	36309.9	39860	80019.4	117634	58402.5	41261.3	47211.3	63323.2	70831	52934.9	40069.6	57604.4	42935.8	112079	76508.9	72459.8	73443.9	65454.8	32120	52233.1	39216.6	78802
P52503	537525	456708	436650	304023	311648	258856	342278	492925	279765	303425	423705	511776	374580	328131	300808	434658	337416	266446	507532	598204	748305	256726
P52623	34135.7	31186.8	31544.5	31206.9	36619.1	28380.6	30950.6	33158.6	27334.2	21676.1	17294.5	20391	26936.1	6224.52	25447	12705.8	40530.8	34964.8	23555.9	23109.2	14902.8	36182.4
P52760	3311405	2.55809e+06	1.78526e+06	1.93527e+06	1.94703e+06	3.04222e+06	3.57995e+06	3.55126e+06	1.9804e+06	3736569	2.08002e+06	2.76789e+06	5466601	1557556	2.21013e+06	2.04126e+06	2.24408e+06	1.90451e+06	2302570	2.82783e+06	5877242	1618300
P52792	88713	78905	54165.4	46988.3	47363.6	75731.4	94270.1	68359.8	98060.3	123760	121549	131253	190043	61147.3	109418	103469	89106.9	81986.7	93376.2	109029	129669	74135.9
P52793	23331.9	21937.3	18623.8	22090	18009.9	21242.9	21375.8	18962.7	14140.8	15549.1	19141.1	14283.6	21381.8	11369.6	17888.6	14900.1	22873.8	20466.7	33443.5	21327.1	22482.4	27458.3
P52795	7697.61	12944.7	5863.51	9159.24	6096.32	15751.6	9328.29	13124.4	30305.5	2444.98	24738.9	16542.3	22147.6	35144.8	32419.6	15345.3	24291.5	13156.6	11840	15850.7	12127	14972.2
P52825	230912	190678	135905	196317	134596	152281	161843	183135	200832	140684	214054	255616	277463	163133	233218	194416	169252	202013	255139	120300	120747	145986
P52840	318939	313248	348517	297125	370697	356144	496490	515455	557390	506713	351952	489695	521186	399074	233349	462610	347014	328308	766162	365086	570158	385157
P52843	56185.2	41769.9	67770.3	30233.5	85153.9	113220	105847	348523	681802	319271	101780	220348	156580	249482	126820	190193	79716.2	50586.9	160283	133123	182315	148117
P53026	209327	200064	221238	206522	238292	215824	148234	150594	150063	114343	83343.9	158239	138664	395160	292788	219895	241428	191004	40285.4	197647	117114	213190
P53395	378736	385098	279181	291884	281269	343622	301660	305989	307769	320747	416746	396415	471933	530697	352946	465702	242252	267061	357001	260206	341775	242834
P53566	20929.6	50061.4	26874.4	36034.3	31646.1	37103.5	51459.8	44329.1	37891.6	24782	29392.2	32522.1	39406.6	12908	21269.6	18634.9	30029.1	24916.6	40877.6	64177.7	71949.4	28423.1
P53612	63362.8	98208.1	125498	121370	122305	95676.5	73130.7	101728	126024	74704.7	82749.8	86854.4	64705.3	107575	111657	111468	133511	116610	55077.9	102840	49043.1	108510
P53657	73397.6	51164	127189	81109.8	104531	130251	55348.5	130355	171855	98827.1	78750.5	78884.5	70916.6	78577	79242.2	51286.2	150284	121847	63835.1	147195	82921.7	117799
P53702	21044	17671.4	29232.6	18717.6	33774.7	43559.3	32449.7	35699.5	37461.9	38954.7	18581.4	33840.5	42411.8	23523.3	20432	27047.4	33720.4	24643.3	42832.6	39569.7	63407.9	28453.9
P53798	26881.6	27695.3	27004.6	32975.3	30045.3	37020.5	22032.5	23480.8	14897.9	45747.3	24104.3	27014.7	35998.3	28510.8	16569.8	30757	33258.8	48154.8	74987	67100.8	36454.7	24431
P53808	181250	195369	202138	173076	136294	210397	272821	260985	251646	241394	150790	192272	229363	112949	128462	121728	242843	241789	236412	192695	191837	223127
P53810	88441.6	77365.1	88830.9	84284	73584.4	80113.4	78526.8	80639.7	109399	85794.8	78673.9	100291	62762.7	78550.5	72432.5	78930.2	71912.9	72604.5	74159.7	63888.4	91356.5	78986.5
P53811	93046.2	84389.4	76875.5	65269.2	75533.8	83522.1	79941.6	81418	86026.8	89978.1	87516.7	79314.7	60679.3	58482.7	57921.3	76624	90832.1	70131.6	79096.5	90085.9	109247	67792.3
P53986	58233.4	53605.5	99013.9	94960.4	118369	95551.1	48865.1	63654.4	71663.8	71727.9	51925.7	61175	18429.6	104634	78699.6	83172.4	82171.4	74215.1	25094.3	63301.4	56643.6	88624.6
P53994	182947	243321	189767	155646	95898.6	94828.4	169256	84976.9	192248	147935	155099	134057	150906	311083	299789	115700	200328	176365	98464.6	233034	130966	161886
P53996	71311.1	78389.1	38630.3	50899	56019.6	49084.3	65910.9	49905.7	623653	56019.5	91350.1	55227.8	65068.5	68064.7	57751.7	116274	50450.7	50191.3	103649	120899	118658	49970.9
P54071	369280	494030	348617	320280	311503	343116	649674	424977	556906	490935	611321	435682	887014	496321	476725	930286	514481	491348	494121	596549	824524	443958
P54103	52999	46314.7	29776.8	34952.8	34045.3	23116.3	31561.1	53330.1	60497.5	36109.3	26155.6	42604.8	42891.1	54690.2	33349.5	36991	38046.7	34603.8	37662.6	38618.7	55939.2	35958.3
P54116	19567.9	18248.4	34466.3	33625.8	33869.1	27620.5	27854	24094.6	39426.3	19758.9	23064.5	25227.5	18534.1	42384.8	46250.4	35988.2	29650.6	32837.9	5683.42	16328.9	17298.7	28614.7
P54227	113881	86787.5	66198.6	128464	54661.9	68471.4	71348.4	54893.1	86006.2	93561.2	47044.8	43474.7	48348.1	32561.5	47056.5	89431	88884.8	64429	116871	134562	357608	158122
P54276	11092.3	17571.6	6642.62	9463.94	8431.91	10547	7548.05	6951.91	11532.8	7411.76	13646.5	9784.96	7767.39	10525.8	5347.34	12001	6011.6	8313.31	12792.4	10582.2	18220.9	9061.26
P54310	5973.39	40113.7	57649.1	59800.8	52549.8	33697.1	31350.1	19672.2	21433.5	6539.47	16018	26222.5	33081.2	48768.5	42777.9	31776.8	36230.9	59952	12779.7	30001.1	NA	25347.7
P54726	76176.6	49622.7	68733.1	44306.8	73817.8	69665.8	71143.3	64671.8	65845.8	62614.5	104324	53759	80055.4	81449.9	91442.8	66702.1	66826.6	34209.7	70147.3	82842.8	86189	51070
P54728	316585	154430	132828	200473	216315	239519	189190	307257	83017.6	389727	138830	209656	255702	137820	139666	130916	151792	268338	383300	475790	596288	147691
P54729	28186.1	18105.3	27013.8	24199.5	30040.4	24757.1	19682.4	26352.9	28852.1	27682.7	17478.8	22420	15663.3	48793.6	24843	36452.3	26939.4	26972.5	17281.6	21653.5	26739.4	25868.9
P54731	30166.2	33928.9	40105.2	36928.9	34487.3	40321.4	28220.6	35650.3	28738.6	23889.4	36110.1	30917.6	25840.7	43173.8	39012.9	42130.7	41721	34882.4	31203.7	39553.6	35773	32587.7
P54751	39408.6	33170.9	33859.5	39091.4	32912.1	44088.6	42575.1	52569.2	51802.3	45318.9	23785.7	24552.6	29590.8	36167.9	19188.7	31684.7	38056.7	41900.2	58411.4	52406	68643.2	43359.5
P54775	145346	131631	86416.2	103573	90876	96036.8	131209	116064	106902	149006	137847	102904	122150	135636	126875	136280	99658.7	88642.8	172296	207875	249728	111127
P54797	25078.1	42398.3	32380	44593	41502.5	29731.7	36987.2	32627.2	44475.8	19288.3	30337.1	34749.3	34444.4	67792.7	34052.9	55880.9	30185.9	43415.1	19687.1	39726.3	24428.9	35961.7
P54822	46947.1	42202.7	51929.4	45485.8	52206.1	39716.2	38437.2	49370.4	45242.3	41914.5	44705.4	48655.8	52155.8	43335.1	43508.8	42636.9	43319.5	41049.8	55657.5	40679	50045.5	45618.5
P54823	21520.1	21622	43960.7	53027.5	54870.9	49134.9	27191.8	41258.8	38754.7	29055.9	33857.7	34233.7	19791.4	62118	50119.6	43935.3	48179.5	37284.7	46995	24065.5	20392.4	44515.2
P54869	220501	141876	157947	145050	136089	129371	115529	93880.2	241311	100032	165414	151239	173178	133452	201519	147789	130806	174476	126015	96786.9	105042	114331
P54923	36335.4	27182.5	25904.6	34258	26516.3	27553.2	23106	30467.5	17229	52929.9	19108.4	28847.7	47128.9	36001.9	32204.3	25095.3	35514.2	28209.1	38384	30830.5	41427.9	35176.7
P55041	30662	33479.9	54767.4	63090.9	61812.2	56592.5	31663.4	46962.1	45750.1	33026.1	21365.5	36227.6	38395	52340.2	47897.6	37084	61147.7	48654.3	27146.9	37249.3	24367	54180.6
P55050	856197	510209	410108	449738	547580	279360	355206	337653	196964	330422	152190	194906	240914	46252.2	89027.1	83227.4	222082	267071	414248	190927	393798	277543
P55065	6720.51	21978.2	25152.9	21099.4	44342	34550.6	21093.8	17366.2	42388	32179.3	17369.2	16729.7	21988.2	NA	27996.5	34869.7	37768.3	27959.9	14693.8	18778.3	36677	53784.3
P55096	89323.6	94945.7	150244	99377.4	126884	144424	80303.7	97450.7	234039	100323	80421.2	101808	104327	133128	135753	87362.1	198732	190160	55191.9	103706	84065.9	150974
P55194	26695.7	16672.2	32554.6	21589.1	50667.3	24621	31407.4	17199.7	12134	23594.2	32759.1	22904.7	28811.2	24054.1	NA	NA	14410.5	NA	30365.2	32013.1	29495	41117.9
P55258	57577.8	46438.1	70737.4	72203.3	64197.8	47075	40024.1	41127.7	109066	36819	64200.1	35609.1	33123.2	122271	54798.3	58211.9	73626.5	66199.7	31248.7	46609.8	116038	65238.3
P55264	320663	200515	301079	294111	330727	257588	227137	514424	451499	534252	278625	478309	559609	429871	393323	426581	339461	227672	405054	259943	381684	314731
P55284	25341.1	23121.3	24688.4	22452	17513.2	18885.7	32921.9	21522.3	43807.3	26291.6	27046.6	32939.1	28946.7	40177.4	54521.7	32162.9	31675.2	8974.15	23878.9	26128.3	36578.5	27169.8
P55292	35199.9	35862.2	37442.3	46780.1	49493.2	44205.1	40438.5	42961.6	34955.8	28864.3	45676.4	48819.4	58111.6	57836.2	37593.3	81570.1	27395	39960.6	43566.5	26274.9	41853.6	34655.9
P55302	135627	104018	79269.4	72728.7	65639.1	101117	126800	100850	118542	106030	100616	87991.7	92372.5	56165.7	64355.9	62230.3	98888	90433	153632	162513	223589	104283
P55772	46127.4	31958.7	56947.6	60544.2	52244.8	30715.2	17289.7	177123	52082.7	45201.4	42737.3	58088.1	168027	61535	39067.6	78681.1	41266.7	38596	42598.5	47939.2	77791	25159.8
P55937	16346.5	13483.6	16241.1	14381.6	10835.2	12282	20063.6	13365.9	24196.5	11763.2	16907	20930.4	14065.8	11595.8	6971.9	17480.9	13331.4	17938.4	16295.9	20483.2	28819.8	14961.4
P56135	1.47457e+06	1.90128e+06	1.99523e+06	1884727	2293154	2297084	1704118	1.98091e+06	2.1652e+06	1.65251e+06	1.92476e+06	1.75546e+06	1141216	2.13839e+06	1.74821e+06	2.13563e+06	2.35857e+06	2.04939e+06	1.96365e+06	1.56263e+06	1925320	1.63218e+06
P56183	36120.1	NA	NA	NA	NA	NA	676.39	21971.2	NA	NA	NA	NA	NA	NA	NA	NA	NA	1	NA	84098.4	NA	721.069
P56212	417967	355490	267384	269854	205238	253332	315419	319838	631987	330463	458038	341662	287347	314077	276278	363177	304197	288660	488823	784243	890342	297182
P56213	160991	128933	61905.6	86893.4	87360.4	167020	169028	173838	249168	164469	151810	120097	171026	113523	117988	135262	93191.3	98686.8	143918	245167	300588	98590.4
P56375	47716.2	32074	26174.5	30838.1	29876.8	27631.9	33729.1	18834.2	27215	25386.1	41533.6	17927	12340.2	16309.1	26956.5	39243.5	29716.7	27819.1	28368.8	25982.2	33633.7	22695.8
P56376	96548.8	62303.1	64842.8	62306.4	74839.3	90661.9	71764.5	87779.6	66769.8	78140.7	47746.4	80981.4	85789.4	58678.4	63542.5	47727	58653.2	53282.7	70949.9	71151.4	107975	62422.6
P56379	109912	128134	199484	138955	199534	131644	93595.6	123134	108372	95033.7	82927.6	111261	54755.5	140532	85385.6	50061.3	159296	149390	40087.8	85430.7	68838.5	124379
P56380	65797.2	65080.4	84376.2	78778.5	101787	80675.7	56484.9	60872.6	77596.9	45855.9	44386.6	74722.2	60320.8	67603.3	82764.7	54006.8	87018.5	88301.4	32880.2	69303.6	38453.9	86105.5
P56382	806040	633200	575333	770780	494808	369652	296771	1.09761e+06	612317	618673	575802	237991	507011	541804	681040	605160	558082	485941	564259	654465	839321	390345
P56387	28270.1	31511.1	41869	38721.9	37400.7	36222.5	24634.2	38182.9	49386.9	32736.6	27078.9	31313.1	23413.9	42963.6	46560.1	33582.4	47193.9	31950.1	37565.2	72665.7	48269.5	46021.4
P56389	196879	175720	134957	102844	107498	152986	202147	173702	154395	175965	152054	150498	142459	112091	80771	84292.3	126500	115582	275712	241737	385587	135056
P56391	2.33628e+06	3.68133e+06	2.63068e+06	2.28864e+06	2.26379e+06	2920362	3.17853e+06	1.99318e+06	2.74046e+06	2.37887e+06	2.97547e+06	2.18089e+06	3.28425e+06	2.6261e+06	3212949	5212499	1.80717e+06	2.73322e+06	3.99275e+06	5956836	6032359	2.3236e+06
P56392	25684.2	14611.8	50915.1	28096.8	24713.6	57213.3	29735	46725.5	45831.7	69202.4	23374	24530.4	33813.5	77154.9	57793.7	45533.1	32359.8	35978.3	37350.7	84601	36814.7	36758.1
P56394	27268.5	87650.1	55471.9	51508	79155.8	85207.4	74086.3	82808.6	692254	42216.1	108360	78697	76016.2	87496.5	67060.6	71417.4	76054.7	95527.8	156618	310682	329682	54261.1
P56395	2.19154e+06	901866	1.57152e+06	795505	682418	93925.1	68724.4	2.75181e+06	2.14966e+06	134929	34691.4	206471	3.81254e+06	2.11396e+06	3.143e+06	2845211	179082	1410572	921580	271552	115213	95069.8
P56399	145968	110315	116328	106001	114133	121828	94344.3	102137	127489	115613	127481	112727	128549	90630.6	106717	107707	105135	114084	129863	118211	119628	118123
P56477	17225.3	23874.7	14004	24878.5	17501	14557.4	18342.3	7087.55	9542.67	8063.81	3937.34	3980.52	6312.14	3469.57	2991.27	5214.67	8579.93	8716.94	6893.4	6985.56	7107.72	10161.6
P56480	976936	735228	608316	673128	682188	576910	679602	1081415	677021	697387	775714	842343	796376	998983	659677	888624	775822	684008	896765	519438	1.24859e+06	646214
P56528	58193.9	42956.4	43188.4	29021	38973	61171.5	48646.2	46345.9	52418.4	66482.3	56494.6	45932.9	82202.1	35129.3	51782.6	46470.6	43840.4	34508.1	52435.5	86341.8	99928.9	28245.6
P56542	85439.6	37732.6	22349.3	50065.4	33056.5	39341.4	19359.1	57417	14054.5	51791.8	54932.9	119414	67312.2	49002.8	51442.7	63682	50791.9	38986.3	19919.3	23559.6	36752.6	47658
P56565	142561	131257	203920	233077	199430	115396	117794	90767	107286	116973	156700	160810	134375	199152	275167	172201	131495	242603	117851	232039	180943	152336
P56593	127829	154302	212288	190018	218423	157996	148670	196805	192912	170191	116944	212514	157351	237019	167961	130299	268114	237282	137456	132632	227909	278381
P56654	383743	400204	383740	240446	276824	263961	348678	234046	166688	296446	577663	446421	396791	456552	395414	335056	308548	347591	254602	223278	370006	290450
P56655	36777.1	29044.4	42319.3	33928.8	42578.6	35694.2	64774.5	25348.8	51980.2	26729.9	41985.2	21771.3	40675.9	43136	44812.3	42793.7	25010.4	23508.4	24728.6	28907.5	9865.78	26509.1
P56657	217899	153292	206782	101853	268153	181793	153154	130320	136534	127807	106005	104316	140711	125080	95064.5	125611	146901	142612	159709	123571	130352	133408
P56695	5462.21	8905.1	NA	7658.74	NA	11609.9	12051.9	7493.25	NA	NA	9968.67	7252.97	NA	12955.3	9266.83	11151.2	16828.8	11360.1	NA	NA	NA	16210.6
P56812	258355	195696	156933	150240	150098	186787	150067	198919	358732	274157	158338	161815	152784	127843	139980	84172.2	144548	147495	253085	318786	436354	100085
P56873	45791	40927.4	22048.8	21815.6	23470.3	45294.2	35724	42756.1	38961.5	54797.7	32545.8	25302	92827.3	35651.5	30533.6	24192.7	29865	31487.8	79575.5	104391	106711	34771.5
P56959	80845.7	63326.3	47637	68790.1	51930.5	60667.5	74558.3	123194	62314.8	111685	139932	86200.4	105904	94379.6	39923.8	129787	70622.8	69791.6	126393	162989	161311	83802.7
P56960	21655.7	25395	14171.2	18532.9	19278.5	19366.9	22162.7	21290.1	21431.6	26581.2	28843.3	27727.4	18109.7	25931.4	24168.8	29727.7	21237.9	21549.2	19731.7	30949	33707	20594.1
P57016	18783.5	22747.4	13652.8	5125.52	19364.8	99601.6	2354.43	84849.9	NA	6283.17	NA	NA	58782.4	NA	14102.6	NA	2141.59	2922.27	75430.9	17195.1	5659.56	46644.1
P57716	56851.4	49737.7	56970.4	57368.4	43143.1	79013.3	94943.5	79198.5	45431.8	98287.6	91453	78007	115921	50601.3	56754.3	43711.3	28459.6	27796.4	58828.2	83280.8	205794	33440.6
P57746	78094.2	69087.9	52158	59759.6	53247	43539	67895.1	59094	48672.8	69847.7	67863.4	57062.2	46706.8	84504	48814.2	69885.5	41769.5	52788.6	78328.5	51952	55788.9	49651.5
P57759	344625	194231	120462	147227	102839	153469	173503	161343	310971	196952	212293	170791	179493	107760	82501	102112	135656	137567	194458	275529	405419	220689
P57776	357854	231891	296403	198398	333935	174526	187759	109127	407634	249723	248244	500730	358369	345794	368755	396339	295874	235977	280520	248207	396996	178878
P57780	97239	79764.1	69950.3	53996	62154.2	78883.3	86037.5	75218.4	102448	113169	129290	108870	130237	101106	79468.4	112034	83764	84488.9	139482	135494	193882	85547.7
P57784	102433	92587.2	74617	89624	81501.8	78714.9	97075.6	82099.2	100243	107120	136242	105820	111209	95254.7	80147	128322	52119	71501.8	80091.2	123050	122189	75677.8
P58021	80348.4	68183.5	145291	133522	146712	140561	70841.6	126945	139908	134828	57015.9	116953	109581	117445	121565	122825	205319	135842	34969	162301	94841.2	153241
P58044	143006	148148	109742	87360.9	112941	166830	103527	93131.1	90735	177665	225098	202501	167062	164351	153251	168805	156685	139658	499150	576259	312795	149022
P58058	25648.3	15178.9	16706.3	23904.8	17623.5	19199.4	16692.3	18034.5	33591.7	18846.5	7804.68	11792.6	9459.64	18452.3	14635	10533.8	26589.9	18574.7	8224.76	25237	36739.3	24563.8
P58059	109604	107306	116372	46341.7	45443.5	44589.3	51427.3	43242.7	117504	39461	70803.5	52054	127049	165717	61187	174123	48802.4	39226.2	97615	39769	47140	51349.7
P58064	47899.9	46309	25670.8	26958.2	26750.1	36191.7	38181.1	23411.8	32969.4	35754.9	43638.5	28425.1	43520.2	35171.6	33560.1	36193.9	30313.4	31861.3	43267.5	61846.2	96371	33640.3
P58137	37394.9	39051.3	48191.1	47564.1	53755	45207.5	30349.6	39680.1	44398	36574.1	28930.2	21648.7	15049.3	29038.3	37723.4	28935.2	60841.2	49405.6	9085.85	39025.9	29030.5	50454.9
P58158	19335.2	18152.7	15566.2	11502.3	12804	15368	22224.4	16971.1	61266.2	15090.5	17058.8	14219.7	15802.2	9126.46	9956.93	6477.09	52821.5	7440.97	14463.4	14867.4	23839.7	37860.5
P58252	236441	190786	246514	221711	235333	223865	162778	235579	444940	220998	172245	178123	198291	280866	300160	244826	279433	224370	272725	259875	172387	267282
P58281	102823	93117.3	73012.5	76263.4	78219.9	88697.3	96207.3	85351	93001.1	80394.6	92647.6	94437.3	101731	104719	89550.9	87173.9	85810.6	77923.4	94996.8	90922.8	113896	65906.1
P58389	59173.6	55781.5	70236.6	59265.1	63884.4	60616.2	54030.2	62789.9	67674.9	70948.8	59517.3	69144	61650.8	64705.7	62898.2	48816.2	54274.1	49715.1	65776.6	86456.2	89105.2	60060.9
P58404	33378	45807.1	94516.7	41724.1	51004.9	33032.9	32187.5	76252.5	37175.8	27144	47710.8	82972.2	45240.2	40974.7	32982.4	22442.7	44303.9	45338.4	25813.8	79869.8	28087.2	31180.8
P58466	28441.2	21731.3	8816.76	8548.4	6175.65	29577.2	31831	25424.2	19011.5	40375.6	20369.6	12625.8	37323.8	8500.73	NA	20202.9	496.076	12615.5	41216	33281.5	66385	3724.36
P58468	5737.1	13922.7	9704.76	6385.82	6740.91	7902.03	11627.3	8215.81	NA	7605.83	17607.6	7850.23	8858.68	14184.4	9029.6	16143.6	10730	8558.74	10934.9	14725.4	14625	7524.04
P58501	1.49759e+06	1.38259e+06	1.16669e+06	588793	815643	418712	613896	1.30918e+06	1.19364e+06	1.33734e+06	690928	1.12863e+06	1288171	1022139	1.02283e+06	577053	1.40471e+06	1.34548e+06	1.19689e+06	1.1107e+06	2.18816e+06	1.53145e+06
P58710	191134	219840	290566	187945	310843	296348	133377	227685	261571	230406	118887	190884	208476	160869	171682	140947	373124	237216	88370.9	172158	153331	264292
P58735	57683	78579.7	129680	118685	119266	147625	89318	206121	126651	87156.5	94566.4	156335	109851	143130	91616.5	133769	141184	203817	63404.9	95425.6	85964.8	132045
P58771	538802	448346	1.61632e+06	381384	502627	722177	631845	746080	1.00612e+06	1.18539e+06	946437	1.14254e+06	928226	831652	573118	977975	561293	435643	724792	902290	1.36527e+06	525816
P58802	22655.4	23916.6	19477.1	24256.7	19417.6	23267.7	26955.3	20863.4	20103.4	26118.4	20827.9	16777.2	28898	20155	23289.7	20282.7	17500.5	15784.7	22558.7	20899.9	31728.6	18720.1
P58871	31638	38886.5	28979.8	30932	23796.4	32001.6	34498.4	36320.9	46450.9	36344.1	39615.4	38317.5	42360.1	28428.1	29664	36050.8	28285.8	28474.7	51170.5	62961	81722.7	29512.4
P59017	77129.4	81232.1	70927.3	58593.5	71167.2	84874.2	81927.7	105034	84653.2	130854	99578.7	81369.2	107072	84438.9	81925	60557.3	68702.3	69708.1	88387.4	89017	128671	67192.4
P59034	20908.3	21960.7	10132.5	16566.6	12933.4	NA	11274.1	NA	12788.1	NA	20054.1	6161.04	NA	23360.3	NA	19838.3	8993.55	6484.53	3249.21	7751.25	10214.6	NA
P59108	49238.7	50933.5	64224.5	64759.5	53422.8	31322.8	38082.1	49143.1	69574.8	48289.5	52389.7	49448.8	30716.4	44983.3	49720.5	45958.2	58723.3	53526.3	31024.7	83954.6	NA	52177.1
P59114	20874.6	11847.8	8940.1	8575.53	7068.68	9732.38	13388.2	22089.9	16343.4	19106.4	29022.4	17800.9	25551.5	13039.6	13082.1	13749.1	9569.76	9271.89	17714.1	21071.6	28668.8	8618.25
P59235	41105.7	38543.6	33679.8	29008.5	28723.6	55264.4	38675.1	49572.8	43729.1	56268.4	41603.7	41206.1	42885.7	NA	33353.3	27841.5	25161	28346.9	40470.1	36196.4	50374.5	18660.8
P59242	47068.1	38122.5	36739.3	33304.7	30757.2	38661.6	37565.6	44982.4	67608.1	33332.1	29494.4	34872.7	22452.2	17881.3	27143.2	25745.9	32433	28140.5	31699.8	36515.1	57334.8	24275.9
P59325	124876	102102	83448.9	63556.5	78226.7	158455	109975	121889	122835	214370	250110	152249	165290	162233	95026.4	179041	97084.4	64719.5	133418	191196	207927	84305.5
P59326	18967.8	29948.4	15525.4	19220.7	28357.7	14922.1	26757	19946.9	30873.5	21911.9	23247.8	12949.4	11793.3	7524.84	7595.25	14555.9	17595.3	12775.6	13657.1	30611.7	30116.2	12213.3
P59481	13048.1	16033	18563.9	17576.1	18559.2	16341.4	14652.3	10347.8	27705.8	25992.6	10998.8	11577.6	28619.8	13110.2	12028.3	13691.8	27188.7	11554.6	8950.74	11406.8	9107.68	17222.2
P59672	14283.5	9701.94	8962.53	NA	7050.82	9242.71	8487.81	10323.1	10815.3	11521.5	12234.5	8152.51	12239.8	8459.83	NA	NA	9785.82	8163.39	22063.7	24095.8	34311.9	11134
P59708	72310	65679.9	64904.6	63620.2	64366.1	65905.7	65481.6	69507.1	72674.2	64421.4	74152.9	72501.3	63594.7	75727.2	65486.3	77542.7	55459.1	47995.8	53163.2	52844.8	54551.1	57190.1
P59759	11074.8	16808.9	15946.4	17614	13240.3	15456.1	17641.6	21867.5	10283.7	35864.4	38163.6	15375.7	13986.9	15616	10412.2	17388.3	23038.5	11751.3	26387.4	43808	64839.9	21026.2
P59913	102320	110392	71785.5	79214.6	87024.8	93976.5	70559.1	78541.7	53438	80544.3	99244.4	87483.2	69952.1	66925.5	55565.3	74293.4	86364.1	87245.5	133596	135018	138398	73077.3
P59999	53619.6	85574.2	131888	127947	133836	92911	59571.7	96796.6	108869	100786	68740	105063	131546	185949	174656	123745	113075	110279	53443.2	61696.6	71525.2	108810
P60003	8543.96	NA	NA	NA	NA	4197.94	3457.7	13343.2	NA	NA	7203.17	7336.94	10070.8	NA	NA	NA	5697.91	7315.2	19491.7	29528.4	40180.1	9522.06
P60060	151679	124951	123373	103287	121994	118691	122346	130409	315742	171307	219987	262118	130368	206200	2.35899e+06	146251	129610	186258	103491	78661.3	159306	102289
P60122	60182.1	58660.2	52666.5	53399.1	48426.4	48807	56648.3	56804.1	45482.4	65196.7	72816.1	57209.5	75839.6	81996.3	50295.4	59687.1	48060.8	54287.5	68050	51344.1	67428	60152.6
P60229	57932.6	49292.6	57266.4	59862.1	54197.6	51716.3	57723.9	60950.5	48854.2	51137.9	45311.1	48356.9	50063	40700.8	46552.2	30996	56133.2	53003.9	59385.4	48328.2	50230.8	49647.2
P60334	99478.9	87844.4	65293.4	38326.8	56758.3	81741.3	77944.8	96297.3	56154.7	86647.8	90901.3	78275.1	128462	32438.6	77461.9	98170.2	43036.4	74359.6	100929	124559	108972	76918.7
P60335	197815	135685	99025.1	97466.2	122080	88014.6	263627	194244	252828	89317.1	167492	312958	116143	313579	222469	204069	98468.6	133684	178305	275831	368658	141137
P60469;Q8BSS9	13356.5	21071.1	8182.06	11982.9	9549.18	10497.1	19691.7	10955.6	8583.82	9297.56	10519.8	8164.75	13426.2	5084.6	NA	15282.6	9347.31	15070.8	12933.9	21178.2	25948.5	4636.12
P60521	34895.9	32594.2	30845.4	33684.9	23776	28041.6	42587.9	23141	30230.3	28907.6	21496.5	27323.9	31427.7	19404.4	26770.4	28389.5	21306.6	25520.5	52421.7	34882.1	42106.5	23655.3
P60603	11918	24737.4	25215.7	25407	25185.6	52660.3	17107.1	20635.9	30646.4	16666.1	10293.8	21431.7	9000.76	13793.8	NA	20029	39543	26273.3	6984.17	31303.3	25381.1	24779.3
P60605	34260.9	34210.2	59389.3	42566.1	52454.3	26789.8	41904	62948.8	83945.7	70689.9	53627.3	69240.1	81576.6	31969.3	51670.8	69299.4	57525.8	61227.1	31867.3	52999.4	50569.2	46178.2
P60670	85970	77919.4	66696.5	67051.7	64693.1	66442.4	80446.1	78210.4	65642.4	92902.9	75141.3	55171.2	80038.9	66175.4	57776.2	66850.1	68957.3	63681.3	86679.5	74968.9	83570.7	69470.5
P60762	31480.4	16529.3	9094.39	22588.6	28492.7	44081.5	36702.6	14966.7	9074.6	22461.3	16566.9	10845.6	28504.8	6804.41	14725	30237.3	11647.4	10362.9	19545.9	15681.1	89370.1	9145.76
P60766	323089	388393	516444	515004	470163	425932	393028	359084	428445	406482	351959	369497	294211	520742	529990	543440	501561	504616	285817	408785	246487	468069
P60824	51704.7	15911.6	29170.7	12590.4	13293.2	31387.1	50796.4	18649.7	43133.5	69769.5	51289.6	43225.1	60121.3	29228.7	35554.4	53968.5	30874.7	36783	89285.9	105233	76350.9	27917
P60843	36355.4	33824.2	45356	44552	52192.4	29727	30626.9	49903.2	71479.2	35658.4	42774.5	38231.6	55239	48020.9	57857.1	49899.7	52546.1	34616.5	22790.2	34767.2	34497.7	43089
P60867	532395	263285	353764	372375	395350	439604	317807	307376	194386	280763	304550	316985	390283	288843	273969	289506	403908	332662	453781	346342	349390	384599
P60904	53807.2	39711.1	34539.6	32270.5	29372.2	43679.8	33496.4	53809.5	50554.7	36528.4	44208.5	39322.3	63106.2	25676.7	32658	40087.3	37218.8	20705.9	45124	55990.9	83605.5	25885.2
P61021	76019	111419	174429	175408	156899	119641	94773	118292	148146	98098.9	89184.2	103379	76355.8	197979	159094	125295	158621	176037	54232.4	138337	108424	171418
P61022	56191.3	43440.6	36105.5	38946.7	38660.8	41879.1	50721	50338.1	43037.4	64770.4	57380.5	42752.7	50539.6	78705.5	75840.5	42741.6	50108.2	37487.3	59209.4	61637.9	95387.6	42151.3
P61027	118632	239030	338487	469913	343347	177668	221225	146470	291952	140925	127035	153088	123744	244089	301649	199541	370581	429935	51224.8	163982	81455.3	329783
P61028	34453.7	24824.1	56647.3	70788.4	44335.9	36848.8	35919.4	34310.3	57028.1	48156.6	39112.1	33726.6	20607.8	76979.1	50082	45490.5	55613.4	50517.5	NA	25977.7	22641	38648.4
P61079	58615.2	12204.7	29474.7	30267.3	30209.9	31514.2	25355.5	39444.6	517889	14043.4	3845.49	45957.1	11781	34617.4	18229.5	NA	16538.6	10925.2	47716.3	16125.3	NA	20589.3
P61082	133938	129004	112121	94883.3	112235	158389	114316	145976	111664	176535	135949	138507	183596	114486	153166	123435	140628	109022	188738	204483	233323	94252.9
P61087	168632	153430	157856	152737	176137	142938	157184	139973	215340	162361	157242	137083	152238	107638	126577	137796	120424	166956	244644	192342	251582	145944
P61089	241546	204918	334190	465041	145817	288100	447826	605424	310497	599013	462368	324742	787247	185449	391621	207196	205664	149766	785444	251987	902584	171862
P61148	51132.2	51108.5	28968.9	22341.9	32072.8	40183.9	52651.3	43769.4	31411.9	41473.5	29448.9	34548.3	59091.9	17324.5	28000.4	24964	38813.6	43142.9	49871.2	60232.4	71933.1	19906.4
P61161	211609	86830.7	190955	132592	124295	100287	114791	152974	171981	184763	83637.7	105467	181474	114328	109245	144672	121700	93869.3	47576.5	49389.5	143448	103649
P61164	83387	82188.9	130654	107210	109294	110439	75402	68752.3	132848	79735.7	87854.5	106341	58143.3	124065	99321.2	87684.5	132744	101703	50277.6	49309.3	38671.6	113408
P61166	133525	144418	227630	293237	206651	105016	119362	158474	137171	143481	83896	89271	107826	86033.8	221330	180667	126531	158370	99252.4	89970	65529.1	175375
P61202	92799.6	82552.4	90824.6	85112.4	91926.8	71576.9	73161.3	95614.1	84515.4	95402.6	63169.2	87406.2	76544.9	76399.7	89524.1	87312.5	81888	78677.6	100938	88356.9	109747	98882.7
P61211	35601.6	17839.2	47884.8	71459	53082.6	37839.5	19713.6	47483.7	67685.5	23717.3	27813.5	45756.5	15385.3	81853.8	46985.6	29943.2	31205.7	71297.5	25463.1	45117	44063.9	76991.6
P61222	50911	83353.4	151398	162233	142298	109356	62789.8	69760.6	103988	66381.9	54018.9	76996.8	44946.2	150705	117509	106661	124272	164988	24135.8	91444.4	69045.7	148029
P61255	33657.6	52546.4	70089.9	139058	121377	78827.3	40777.4	77500.7	345138	54507.4	33806.9	57872.2	134655	41974	78882.6	71295.6	88088.1	116993	31755.4	77863.6	49177.3	60863.1
P61290	58763.1	50671.2	37712.9	47270.5	46360.8	45868.2	53320	49236	61239.2	57708.4	47396.2	34385.6	49249.6	48621.6	39569.1	48354.8	51319	46868.6	53808.7	80822.5	96380.5	41985.6
P61327;Q9CQL1	25732.4	29577.8	47570.7	44601.1	52713.2	32345.5	33220.4	32479.6	9628.17	31039	31811.1	25641.5	33968.3	66560.3	44256.5	39953.9	30137.7	27633.6	18002.9	27358.4	16201.7	34528.4
P61358	404724	314604	191750	213865	191789	340356	219242	144206	158577	123765	233223	264142	217945	467392	178294	403499	482747	218564	209367	195121	354123	225086
P61458	210267	168893	114638	109621	120486	177084	264093	357116	187193	741767	235043	397614	343275	141108	128696	193121	338076	220544	242311	220222	867904	100857
P61514	33268	45436.8	73083.3	74745.8	76699.1	74611	35950.4	51928.6	62218.4	45194	26216.3	38360.4	31274.4	61485.7	56460	57869	90530.4	60688.8	20894.4	74810.5	36891.4	65924.9
P61620	46635.4	67117.8	144992	136567	154238	99378.8	55045.4	75447.2	116971	73747	47055.6	78716	58351.2	143255	124273	99490.6	108453	100611	20094.3	61705.8	30613.2	157073
P61750	57474.7	61297	76046.2	77037.7	67238.4	58189.7	54942	58122.5	84430.5	50700	56730.3	67113.5	36085.9	58911.8	72290	54071.3	73772.8	67846.3	71259.5	76782	56701.5	88714.8
P61759	68301.6	43393.2	36820.8	34341	34370.4	37360.2	54269.8	34468.5	43378.7	57274.6	57782.8	43078.6	38394.5	39223.8	34464.5	48666.4	31776.2	36598.4	64457.3	66163.2	79075.1	52585.4
P61804	116136	63835.9	134642	133447	143164	183430	76750.4	111367	128940	128761	38700.3	88230.4	128781	123343	166349	93680.5	102412	84688.4	34774.4	104627	81815.4	93612.2
P61922	206959	211119	206024	187680	188672	158407	206096	171436	161399	183810	186303	226550	246119	287871	217259	213865	156411	189163	192029	109044	185442	174325
P61924	154462	189719	248887	259554	249511	197807	134551	184577	337792	177733	133514	176129	138951	215077	201673	149837	236035	212303	151713	174583	125878	241241
P61953	30890	29230.1	25724.9	24757.2	20420.7	34239.2	31122	24860.8	NA	27860	36030.9	26853.9	37137.3	29058.4	27677.9	28439.5	26581.8	34309.5	46966.6	50781.4	63414.6	27420.1
P61961	335805	245913	197791	238674	278482	197989	284096	243583	295535	256070	267446	194842	255756	134651	174025	153823	202762	237244	361733	353380	421569	266356
P61963	21745.2	22417.3	24127.1	21655	22139.4	21664.8	21360.8	NA	25467.7	21297.6	23439.8	25886.3	21862.4	28266.6	25946.6	25478.3	27028	23602.2	17440.4	17118.3	12545	23408.4
P61967	32621.4	41502.8	79483.2	90162.8	71691.3	75798.7	35533.1	63513.6	68343	52176.6	25897.9	43487.6	32968.6	54235	66218.8	46998.1	85597.5	78843.1	13454	56923.6	29762.6	79026.4
P61971	127107	111521	114528	91721.5	132210	81310.5	123833	117200	83041.2	169530	135264	89913.5	205564	112031	133991	156295	92659.9	70891.4	205229	215495	262169	96922.4
P61979	130863	121582	92491.2	71172.3	67877.6	128774	111473	135618	590713	170926	173792	116561	113042	168318	110984	198469	112536	81915.5	200250	164800	233052	75284.7
P61982	756311	695465	826850	739504	700102	998859	687050	1.04913e+06	773674	1.11706e+06	738926	1087345	1.06182e+06	611136	617127	535314	618728	614731	984527	584384	1121745	948479
P62046	709.674	4987.25	3574.31	6237.23	3164.1	3450.44	5615.13	NA	NA	NA	4400.18	4028.84	NA	5549.66	4821.65	4877.73	3867.22	3631.34	NA	NA	1230.69	5170.52
P62073	44773.5	30109.5	26244.6	37195.8	29251.7	24212.2	26609.1	24115	21902	20877.4	41137.1	27423.2	31998.8	38341.8	40114.2	52397.6	22490.3	27132.6	44359.1	69892.6	63876.4	30813.6
P62075	366375	354048	222957	199054	229665	305333	330668	396510	425381	465628	435991	467008	720081	353491	276438	402354	310006	266658	241217	436683	916212	192423
P62077	143756	103860	43913.9	46087.2	71802.2	127763	85973.5	127547	154097	126472	115169	95519.1	163579	64928.4	152191	115494	68287.1	65306.4	122783	208609	296068	52381.6
P62082	163655	310277	358611	446350	392959	173861	172852	164564	179647	101251	167837	225331	136626	599679	505558	371972	320396	310831	83591.7	174895	122376	359391
P62137	283764	234086	235070	209259	219011	197151	204476	238848	273796	248148	262467	249197	235221	235683	208107	305401	237263	226990	329725	224866	263233	231372
P62141	95018.2	104335	96586.1	96078.4	99435.9	68304.3	91605.5	74764	106645	76269.4	89663.2	70252	127248	96626.1	74967.5	121713	71601.2	90167.6	111960	67821.1	58755.3	67846.6
P62192	192194	144680	172104	114103	115213	131191	141538	143215	160182	274715	185776	143041	249765	160007	99934.5	183269	150565	132629	245788	257658	289406	272216
P62196	154851	122108	120879	143840	240978	190300	245190	153007	133408	132272	108295	122066	233734	145662	155373	132919	168209	101544	240526	165193	235530	153672
P62204	106809	90752.3	777020	60718.4	103849	87315.6	78367	104259	169562	107301	171891	133689	123248	105150	116969	110599	62588	96224.9	85733.3	64868.6	182857	90339.8
P62242	42583.9	42414.3	72390.9	70951.7	85313.4	109944	37254.4	65881.7	94004.7	78837.1	42986.5	44863.4	56075.9	73865.9	74077.8	83934.1	114529	73277.4	25252.7	85665.5	49356	92391.4
P62245	193938	213902	350676	330864	368122	239525	182211	186342	204076	200601	156165	260035	135215	442276	294023	232612	309968	211797	183389	300232	122488	332445
P62254	81376.6	72526.1	58512.3	68328.9	55635.3	65602.5	77252.2	57877.7	58468.5	74098.3	81901.6	66495.5	73250.4	69363.5	45169	59796.7	55535.3	55301.7	88880.4	105835	143001	62520.1
P62257	147894	115181	90996.8	80113.5	82492.1	109125	107854	99041.5	67032.9	116531	91355.2	79852	51041	56080.1	47768	64277.7	102856	104501	199270	255720	289148	106435
P62259	139332	99945.7	82918.7	110695	123669	67927	143805	52981.1	132138	107495	133889	130701	70112.7	144974	113927	86820.3	112608	66883.6	131986	69417.8	67116.4	114743
P62264	69701	68621.8	100223	98336.9	93955.3	52068.6	48343	48833.9	201560	61098.4	60002.8	76887.8	21532.5	157944	68837	81179.3	62567.3	68035.2	49057.2	33541.2	31861.6	89482.5
P62267	27799.3	20105.6	26050.6	21568.8	25675.6	80215.1	21749.3	39067.1	174216	32082.7	17894.8	13923.5	28796.6	55161.7	35056.8	45315.3	113977	21116.9	14499	61334.8	52709.2	19912.7
P62270	745771	841776	826780	789467	738376	776487	751902	625887	855517	1.3621e+06	543348	1222278	896581	713797	707115	1.33223e+06	655412	612290	827940	501199	1.06864e+06	883635
P62274	180619	143938	7698.29	65060.5	87987.6	144528	39145.7	7447.6	292309	177134	118487	87905.4	186765	51540.8	62615.6	73854.9	132160	65505.2	13937.7	43058.4	26874.7	7802.81
P62281	66568.4	108588	186032	174396	227774	243888	73400.1	108844	190129	117942	46628.7	97346	86239.4	137601	182941	204623	263121	200888	39707.9	170265	86525.6	155616
P62301	201558	176182	341629	303520	339086	314713	236802	252952	149065	316703	231115	188560	218934	260325	197088	151679	357214	242135	252087	249098	189320	289991
P62305	50960.6	63040	103031	135304	116766	83566.5	37368.2	87710.3	79027.4	70762.9	64053.6	67278	46510.4	106145	103194	124706	80103.6	72491.8	17735.4	67124.9	28566.3	80297.8
P62307	1943.03	4738.38	6408.78	4457.91	2796.1	4065.57	4830.61	2967.91	NA	771.291	4086.56	1718.57	2730.16	6767.52	5846.42	9807.78	5221.89	3047.12	578.05	4331.65	1332.01	5289.47
P62311	318432	229494	220549	212684	204109	296031	283880	313292	258488	407279	298684	313139	323803	215263	189251	263536	206560	170799	243335	315921	517041	174908
P62313	198907	156128	140857	148083	132407	143491	165210	164090	9807.44	187073	163804	170015	149016	96242.1	108865	120344	114762	96948	119161	95142.9	161113	119225
P62315	48119.9	56542.4	60594.6	68462.6	66470.5	115605	53961.5	99825.4	111514	100100	65185.6	95632.1	78854.9	73324.2	136208	52505.1	64780.8	82800.2	20226.4	75028.2	38140.4	93933.8
P62317	122228	106259	120897	93608.1	118279	73697.3	75095.4	93092.6	166957	88292.6	163443	109647	99121.9	145523	87027.8	110246	89236.2	67391.5	80087	56606.5	66220.9	61800.6
P62320	47181.6	48767	43368.4	48739.3	40969.5	19795.2	38450.6	20485.4	106548	57822.2	51725.8	44420.8	32458.4	48498	42667.6	60642.7	21341.1	27925.2	23178.3	39241.3	43129.2	42229
P62322	119810	100740	64186	78069.4	65683.4	98284.7	81956.1	90414.3	84076.8	111507	98370.4	88509.5	112704	59542.6	56943.1	67386.6	71287.6	48866.7	90637.6	120043	167813	59134.2
P62331	49646.6	24552	19696.1	22282.3	35337.2	29198.9	26731.3	57677	52786.2	17498.1	25363.8	22361.7	19351.7	49295.6	32242.3	37479	18519.8	29802.4	81984.7	26615.4	21661.7	24342.3
P62334	315002	262976	232224	194922	188808	271117	243327	270930	299808	280544	310695	221637	197810	204092	217966	278321	168224	202657	307067	363499	478577	241933
P62342	33121.5	35848.2	47608.4	47107.1	47361.3	41585.7	38041.4	38436	60983.4	58536.3	32733.8	36643.3	45528.3	45424.7	46201	28051.9	38704.3	73724.4	20274.5	51781.6	43893.5	51695.7
P62500	99449.1	60677.6	51062.3	27643.1	43867.6	42806.6	42502.1	53306	54710.2	71574.5	38008.4	38966.1	30252.7	24550.7	25202.6	44635.3	35761.4	47621.1	85402.3	108927	116017	31565.4
P62627	161920	146013	105863	98979	101905	124969	138445	126024	159744	148759	143555	127129	111846	86105.3	79975.3	108981	124392	113059	183568	220915	262049	117273
P62702	243256	247203	417453	422962	374825	259653	231149	228687	346777	159059	156860	185596	186033	308773	266921	219495	320307	267133	143488	251993	140423	333071
P62717	49140.2	70731.1	127320	142870	176750	178609	48712.5	82989	190693	87622.5	42083.1	71674.7	83628	136483	155627	122348	172319	191271	21121.6	108299	74514.4	146010
P62743	13162.6	15765.6	21189.1	37146.5	29693.9	157740	9363.6	32076.5	101108	8297.67	64927.7	47865.8	23901.5	22800.6	35363.2	32620.8	24060.3	21913	NA	151643	10712.3	23067
P62748	48375.7	31286.3	35326	25465.8	24361.8	15196.9	25555	47305.2	15257.6	39948.9	38191.7	19269.7	27051.9	54178.6	32262.3	33596.6	25914.3	14049.2	60265.5	33072	37628.6	42435.4
P62751	170518	127381	139700	139485	131866	169126	116417	154128	85710.1	247951	107468	143225	138617	138175	125681	156510	123539	107504	119809	149965	136088	118851
P62754	267580	256752	292742	275998	281561	243135	213335	200582	741667	257398	231878	221822	194051	303319	261538	186322	272642	245758	154932	155178	122892	215290
P62774	63065.7	7823.69	113809	88208.6	108285	38307.9	112815	46256.3	141161	148748	56733.7	82717.6	92127.4	82355.9	102137	28530.2	55961	103362	119105	195951	108008	92794.1
P62806	71719.4	76146.9	65807.6	106374	89141.2	42994.1	57537.5	65234.2	76508.7	107050	103617	77237.7	84672.4	90909.2	86073.2	115094	73025.1	67147.3	63537.5	89845.9	48193.3	54498.5
P62814	111866	114339	169076	200375	159278	147388	117447	146932	191390	152259	104948	129907	96068.8	220103	169574	170541	178389	169389	66512.8	124183	89772	161455
P62821	32265	40434.6	67473.4	54855.9	42357	62187.3	35573	57819.9	70365	46757.5	45768.5	40180.5	44155.8	77268	73270.5	65371.2	47819.5	60516	30988.3	65004.8	50811.9	64823.1
P62827	88549.9	113083	191176	181677	192707	146788	91757.4	128781	39910.9	115518	171548	117273	142193	194638	186440	150575	187819	163431	61066.6	143898	127389	165659
P62830	243403	203053	214668	324196	359279	402714	109048	274351	340420	246875	156807	244122	283450	360618	310520	301381	480787	289692	140681	462259	314164	351291
P62835	49754.1	54328.5	51036	56868.6	54999.1	81763	55655	68910.3	95051.4	68401.4	60588.3	49593.3	63048.9	57661.5	100883	111461	84485.3	74097.1	31282.9	55261.3	55998.8	54911.5
P62843	95908.7	251164	154573	102363	50261.1	135703	56649.8	131535	235047	148720	135974	149210	170987	276755	190733	161737	78740.1	25845.2	105929	82942.1	105570	280306
P62849	119993	138217	148526	91128.5	122159	114021	122577	168917	137740	108015	117931	157170	123919	177674	102956	126574	197937	144064	110316	123187	90535.3	129345
P62852	3.89438e+06	4.0418e+06	2527572	2907727	2370665	3.65986e+06	3569153	3194836	2.92379e+06	4.6082e+06	3362366	2.43217e+06	3.6971e+06	2.34665e+06	2.2143e+06	2.78281e+06	2.7244e+06	3.1653e+06	5.44583e+06	6107801	7.68277e+06	2.65799e+06
P62855	471055	245517	427851	510703	509220	359596	190042	293972	203026	321172	180054	240467	192329	422032	301242	275152	464428	833954	153866	307020	370715	516123
P62858	713553	612964	351345	146340	160885	420702	622795	215813	659246	286536	595529	344570	251818	868019	303228	581390	231545	246760	606107	542206	664000	314017
P62862	669657	627830	577555	635955	631353	583452	642908	579462	597733	505163	579836	548359	574447	473614	456763	595551	694836	598520	551083	983920	919429	622899
P62869	119504	99870.8	107466	119983	107962	124182	93400.5	140086	111753	157411	75076.5	110576	135353	82849.5	86673.5	110407	104907	119500	168355	200899	257070	94303.7
P62874	72497.9	81485.1	96136.3	59850.8	80160	74464.1	78891.8	64285.3	113536	66067.3	112617	90266.2	89961.9	95038	90933	83781.4	87156.2	85920.8	68889.6	81386.6	64375.3	66328.9
P62878	9428.69	20191.7	12073.3	9019.35	13503.1	7673.47	7966.51	5303.36	30114.1	NA	5208.19	4515.43	NA	8376.82	6689.21	NA	5934.14	8832.84	10870.8	12777.1	11125.1	4900.73
P62880	71386.3	83501	103374	91930.5	103366	77166.6	69986.1	42942	301989	68036.2	87659.7	69894.8	59892.4	90030.7	113707	93437.1	81836.6	110717	36928	81944.7	44822.5	123238
P62889	25852.4	36547.5	38339.9	39115.6	39799.4	71136.9	36037.9	71990	94072.3	41649.5	28765.8	31055.7	34113.8	38420.9	40263.2	41833.4	84448.9	38339	18623.8	68557.8	38514.9	39991.2
P62892	1.34244e+06	1.59926e+06	1.67316e+06	2.05903e+06	1.94289e+06	1.69732e+06	1.30248e+06	1.398e+06	1.64619e+06	1.47927e+06	1.16647e+06	1.05323e+06	940062	1.3636e+06	1.25261e+06	1464806	1.52409e+06	1.63711e+06	1.35978e+06	1.80146e+06	1.8501e+06	1.83401e+06
P62897	435436	1.61138e+06	1.16668e+06	1.41622e+06	2.47675e+06	1509604	1.59685e+06	1.31469e+06	4.12402e+06	32701.8	172724	1.28094e+06	197193	1.60409e+06	1.2492e+06	3382009	970860	1236980	73878.8	144493	119743	1.12554e+06
P62900	391845	620912	600100	640668	711944	656507	583596	460909	759169	405962	529264	496428	552176	662149	646528	860296	509185	613988	620386	490384	403472	555051
P62908	206444	249784	451796	503252	509754	522726	211956	356791	479740	383931	215162	277118	280421	494912	415405	368686	531433	429835	149928	464814	199448	471817
P62911	31375	58048.9	99753.9	108965	118738	113008	48685.3	66069.4	304180	111511	44580.2	59004.1	54775.7	97325.8	76327	84774.6	130562	92237.2	40752.1	110744	57876	132267
P62915	49607	23741.7	20539.7	35044.5	23515.4	15812.7	27879.9	19656.4	42665.1	19251.4	30474.5	22175.1	27451.7	34184.5	31869.7	52692	21129.2	37306.2	47302.4	49186.4	56332.9	23149
P62918	49730.3	84822.7	102811	91672.1	101903	90399.6	50396.6	62916.7	172607	45534.5	47922.7	53336.7	44858.9	100235	77750.5	129199	101304	111644	33010.8	100299	57218.9	107627
P62960	169291	34173.5	24095.1	19423.5	36810.1	39930	37523.2	46824	327203	35540.2	41311	47879.4	60328.1	73611.9	22938.8	75261.6	58605.4	32720.3	84180.1	71562.8	92282.2	29112.4
P62962	181040	168241	277153	331030	227657	179468	158632	247818	235452	179219	233729	194773	196180	240283	214524	154156	253308	220976	101207	226425	167732	203568
P62983	14346.5	17773	14436.1	18680.7	18862.6	18747.1	12475.3	15207.6	24432.9	19330.9	11066.7	16973	22985.4	15308.7	22182.6	43207.5	28871.9	26345	11505.5	34345	19577.4	20974.2
P63001	138822	93606.1	152718	180462	175488	120846	178593	125054	145407	129630	163718	119010	95506.9	208574	213930	209483	181796	159530	89401.7	102319	91823.7	138497
P63002	14972.6	27047.3	12715.6	20888.9	19154.2	20583.1	20208.8	23596	23739.1	20797.4	NA	17738.1	NA	16085.2	NA	9218.11	25137.5	14181.3	15491.5	23792.3	NA	21793.5
P63005	30853.8	40442.8	73498.5	71619.3	69790.4	50774.1	46650.6	42864.9	68417.5	44543.1	31671.9	45456.7	40212.2	67657.7	61040.5	24294.5	56313.2	48860	19844.6	32942.2	31958.1	53504.2
P63017	545363	399599	240446	270208	256458	308705	436810	447402	457982	581721	322345	353100	434630	275803	325090	397273	313226	338907	480587	432564	624880	301300
P63024	39286.5	22997.5	26248.6	19770	17739.9	36895.7	22199.5	31899.4	21321.2	30760.1	27189.9	26191.3	17652.3	NA	NA	26904.4	21047.9	21676.8	31541.8	35115.4	41049.1	21396.8
P63028	111250	79688.4	78965.7	54530.6	84402.2	98699.7	135472	92399.6	104889	100580	133486	109799	194555	81661.9	120618	117975	85898	77950.1	200872	286614	329312	93400.6
P63030	31369.7	45521.8	60386.8	65283.5	52915.8	63222	54300.6	47862.6	33920.9	43857.5	33982.3	67924.9	79026.8	56456.3	92516.1	44874.5	45471	37509.7	33578.7	26061.1	30323	38349.9
P63037	290890	254480	172391	192064	232227	167448	204692	195640	260751	218866	182732	161162	192922	131173	167635	179516	177338	203734	249664	194106	213831	223580
P63038	471695	580750	255159	445637	397301	403430	430389	330299	461749	412927	393742	397391	497430	345527	481861	521574	310548	446607	481394	470219	860344	363080
P63073	251508	178531	129432	174073	151424	167307	180148	179270	189450	199406	217623	158452	193966	137223	137544	162717	130009	144493	245737	291617	407952	150275
P63085	157319	139381	143714	144498	164366	146630	144793	167077	93789.1	174128	129295	147804	139997	158008	135494	104546	147244	141998	158198	121212	132092	142843
P63087	72978	95180.2	78671	88625.7	76656.1	60132.2	92132.5	77429.2	118604	94984.6	67381.5	82925.2	81397.3	35856.1	68118.3	95132.4	78564.3	66876.1	84485.6	44422.3	64976.3	57415.3
P63094;Q6R0H7	61776.3	76163.1	72804.3	81695.2	65612.8	64319.2	61170.4	62461.4	90912.4	77996.1	76501.7	65550.9	85933	84704.1	65000.5	64606.2	62090.6	54847.6	64347.2	66849.4	87459.8	67521.8
P63101	93848.3	82041.6	75989.4	73153.2	253007	158861	89912.7	140887	335331	92596.6	100130	177078	163317	111409	249604	107774	68905.2	54104.6	156982	76379.1	275680	55295.2
P63139	61173.7	51064.9	23657.4	31129.5	35172.1	49643.7	51686.8	42584.4	49736.8	60447.9	63874.1	33246.4	39286.9	38423.6	41158.7	52946.4	45978.7	33599.5	98486.1	104769	135842	31411.8
P63147	118644	118127	91095.8	82958	92471.3	83039.5	66072	72748.5	75982.5	81525.6	64810.4	98439.8	58419	60139	72418.5	83461.6	55951.8	48869.9	97789.6	108901	151461	66720.8
P63154	11898	14748.8	11203.3	12625.1	10537.5	8329.71	8556.11	6628.49	12821.1	3277.26	14172.2	11032.1	12949.4	9992.83	12362.6	10921.7	10880.2	11662.7	10202.6	20818.1	NA	30093.7
P63158	134832	227762	93409	228033	200990	220530	147708	250819	401689	213976	358023	141536	528356	237690	293259	321854	163376	251633	373776	258756	169986	172204
P63166	8674.72	8603.17	5162.11	7094.12	7285.89	4078.09	5812.98	4732.22	15122	4004.08	8303.92	4536.83	4402.6	93992.6	2995.68	6112.97	4874.36	2894.31	5401.22	6837.66	9441.12	5299.04
P63168	189376	267821	38872.6	36750.1	30802.1	295024	212856	218634	24902.4	172328	39037.3	52851.7	22125.3	69200.5	50280.1	79816.7	47998.6	29799.5	31480	73467.1	172882	53417.2
P63213	18903	16231.7	16239.7	17084.8	9653.66	13736.7	20291.5	15630.7	30641.1	16514.5	28681.1	22283.2	12560.4	19557.3	21081.7	32696.8	5442.32	NA	21641.1	10163.3	15506.2	7125.22
P63242	181608	146439	128539	109247	150740	140271	143815	135950	122154	147677	154181	141955	163375	148900	119219	169269	108171	114177	187628	201474	235262	170469
P63254	349233	260576	345832	318048	209960	199147	310957	383933	224373	549998	195124	331166	332021	268341	218031	390294	345463	317595	398229	586963	809117	400675
P63260	595083	645431	508750	359799	410004	634655	692275	1.11598e+06	1.40694e+06	4357732	1.00555e+06	1.26368e+06	1.59112e+06	1.28361e+06	663495	1.1644e+06	3.03108e+06	860681	611615	830383	1.53581e+06	489678
P63276	585029	462501	398002	283910	360471	596471	401267	561178	584102	780753	545035	606559	531089	445682	633858	390969	714647	356880	372035	542301	925418	285456
P63280	99678.1	88332.6	73527.9	57380.6	72445.7	126069	98235.1	97827.1	73656.8	112496	80557	86049.6	107163	55460.3	61076	74067.8	73445.6	65776.3	95420.6	97421.7	172737	60633.5
P63321	36049.3	32415.1	52515.4	44236.3	49214.9	40210.1	41512.4	34896.9	29938.5	25634.9	17580.8	36034	29064.9	36039.8	34903.8	32458.2	32540.7	39611.1	4863.67	26937.8	18556.7	44127.9
P63323	657333	721209	351367	366225	392685	628779	703055	571524	665241	714087	899227	533404	819975	375587	447103	778523	471869	396251	954545	1.3752e+06	1518410	522506
P63325	193458	97916.6	74043.1	81757.6	153101	122764	155856	66353.8	53350.1	98068.7	105556	102096	142481	141041	77572.9	187111	46873.2	106788	291933	88859.1	223292	91121.6
P63328	115110	99524	112184	97719.5	96437.1	101861	100929	123512	95208.7	126279	121658	129792	125196	104705	121343	101957	112129	99677.2	130182	102979	97921	104226
P63330	47909.9	33170.2	30676.8	29729.8	30495.6	44370.7	53100.3	42069	84539.9	42496.9	33250.6	31593.1	38467.3	32412.7	43071.9	44603.8	47887.2	37863.2	24915.2	58301	31513.9	37642.1
P67778	436822	289931	279134	243694	265734	258524	296964	311844	598635	405259	364934	370766	599502	322016	376590	409451	307342	265669	306108	426864	630900	222412
P67871	139848	111033	70930.1	82593.2	64388.8	80413.5	139833	70024.5	55021.1	105780	82605.6	71714.5	123927	84691.4	55743.7	70907.8	50252.6	67349.5	219707	116769	146854	90682.2
P67984	485319	537319	598026	590346	641860	631316	432537	452762	699648	471084	367514	391896	480237	383960	366022	468597	561603	453418	340119	559585	636466	484004
P68037	473235	433375	249537	229759	242074	309806	341819	325399	395548	364492	430173	353958	319104	180339	263154	417013	216744	269613	514792	540594	739642	287632
P68040	142183	146206	246653	219912	272997	290015	113230	221591	198279	231931	142938	164714	189885	268226	212142	200101	278535	201112	103821	217202	152592	230243
P68254	102621	98433.3	86232	49573.1	81593	150965	66379.3	117558	51179.5	127216	92385.5	138273	124093	76804.2	115880	103930	93098.1	80362.7	108981	129220	176198	107010
P68368	633694	650439	576908	362001	584956	439166	477860	427401	449409	501604	623895	434084	451245	783078	766752	787030	461521	696789	802352	767754	922392	364680
P68372	1.60256e+06	1.43112e+06	1.1101e+06	1.09649e+06	1.11073e+06	1138314	1.85591e+06	2.44188e+06	3774787	1.63632e+06	1.38798e+06	1.27007e+06	1.39201e+06	2.12503e+06	1.10758e+06	1.22786e+06	907890	902863	1.7431e+06	2.01929e+06	2.67225e+06	937194
P68373	67926.3	54793.1	30471.1	66239.8	26606.6	72246.7	53930	87974.6	113429	141882	38340.2	73815.9	88675.4	89376	86467.6	125478	130234	57735.2	152282	140992	152674	77111.2
P68510	137296	118258	149153	150262	125607	102737	124763	110807	164194	134222	135035	126530	96365	127534	136112	117357	105317	105310	148164	119997	197639	184081
P69566	4059.08	2232.19	NA	3152.75	3200.24	3342.07	2693.16	2294.96	NA	2576.19	NA	2087.25	2173.32	NA	1681.87	2042.39	4119.64	4164.21	3153.54	6167.56	5423.03	NA
P70122	41861.4	52943	58167	70195.7	79082.5	55048.1	47103.6	49323.9	63349.9	43139.6	55614.9	47044.6	41276.8	65454.6	57831.9	55327.8	61860.4	78506.1	38252.7	37874.9	31572.3	74547.8
P70158	71824.7	55792.2	48767.1	47344	53623.5	55227.7	64581.5	73151.6	69944.8	86691.9	62329	67550.1	92769.3	38848.2	51358.1	57294.5	55954.2	39350.7	83078.1	75217.8	142468	44966.1
P70168	51677.5	50285.7	67036.4	104533	78012.6	44947.9	53770.1	50898	45782.9	56302.3	54643.5	63096.9	45548.1	69054.6	63354.9	49399.8	81352.3	102590	64044.8	91705.8	81420	64268.1
P70175	27806.9	16260.7	22219.8	17190.2	11731.1	23554.4	33387.8	25083.3	24635.5	29691.5	27125.5	21534.5	21704.5	18884.7	13600.8	17773.8	12799.6	15741.1	34841.6	31646.5	50258.5	19204.2
P70194	100108	69284.7	60495.4	111466	58092.3	66623.5	97918.2	71967.1	43749	91034.4	62402.8	61973.8	69919	45921.1	57189.2	67366.2	63955.4	56267.2	59862.7	93205.8	158067	66416.6
P70195	92453.6	77050.6	62398.4	67297.5	49010.3	59233.3	89887.1	55719.5	72013.5	57587.9	75608.2	56265.9	67409.8	117389	97825.2	47138.7	42540.2	73850.7	82012.5	86447.4	68609	56517.3
P70245	169690	204056	393589	347023	305031	333751	197515	230697	186254	217661	171198	175648	228013	360177	383907	252059	409663	288904	86945.6	183203	125547	363775
P70255	32357.1	17460.9	15599.4	12375.4	5952.38	7149.37	10630.7	9659.11	23677.7	13708.7	15948	10934.1	13723.6	13543.1	10534.2	14490	11760.4	14732.5	23873.6	20922.6	48235.4	9498.82
P70261	10298.4	10365.7	12560.7	15877	14460.4	11346.2	25689.3	13285.1	149506	9407.01	4090.59	13566.1	27628.8	11833.9	25006	43898.5	12977	10752.8	17658.1	21396.5	14232.2	8714.43
P70266	38233.8	39755.8	65012	48469.5	52336	42726	28305.3	31501.5	39115.4	25957.8	21433.1	29711.8	32948.1	26416.4	21678.8	22295.7	61210	55379.9	29170.5	58254.7	25678.5	57697.5
P70268	792082	530860	515925	423971	393256	711989	795166	859970	12538	873791	714677	495233	497465	365563	307756	463793	295075	356006	687825	716144	1116716	352097
P70274	75344.1	50971.1	80338.1	61157.4	50754.9	77802.3	111533	27069.5	86944.9	129482	52650.5	63762.4	211571	63250	80167	78495.4	49871	54129.7	149404	30417.5	167508	78607.2
P70280	47411.8	61394.6	56163.8	59871.6	68243.6	51856.4	51667.1	49937.6	62670.6	31422.1	56863.1	40116.4	33430.1	60896.3	49762.6	53048.4	47051.8	52646.2	31428.6	52971.4	7894.77	43851.4
P70288	10589.6	23296	29442.8	30256.6	32061.4	17658.5	12539	14263.3	21449.6	15656.7	NA	14978.1	14226.6	23727.9	24172.4	14155.3	16565.1	19855.9	8538.66	14263.9	9362.8	21472.3
P70290	63321.4	64665.5	48852.9	62110.9	61757.2	60763.1	65133	51450.3	62055.2	50565.9	64043.8	67041.4	128105	105890	85386.6	102721	57042.6	41460.5	70502.5	55441.4	76089.5	54113.1
P70295	151612	114863	109739	111799	106717	117834	109054	109805	135217	134775	107955	96612.5	147242	131232	92603.3	107308	129109	106416	95996.7	91036.9	98135	90253.4
P70296	295855	258892	202290	136266	203980	152126	209262	129300	261531	220080	242866	184597	197734	176510	175897	197535	134199	179301	181542	258953	449696	94623.4
P70297	88069.7	73389.4	66816.7	63940.3	51168.6	70550.1	77115.8	74633.5	63237.1	80760.5	100310	62740.6	75214.6	77996.4	66984.3	74318.2	51911.6	52095.5	104298	119632	149241	49577.1
P70302	80588.4	62853.8	53288.9	46765.7	52761	71115.4	65363.5	78272.3	85576.7	91741.4	47148.5	48787.9	83966.6	42237.6	47295.9	55731.7	53266.1	41259.5	87159.1	84227.4	115805	64958.8
P70315	8475.47	7170.61	5696.38	10854.4	5606.96	5903.41	10423.4	5214.14	NA	8496.42	8316.34	6442.05	11478.7	5513.05	6220.6	5855.44	4801.93	4723.76	NA	7605.68	34197	4888.44
P70318	61926.1	60351.8	68234.1	60122	63753	67385.6	67031.8	64913	71484.6	64705.3	53747	60508.9	48142.2	65751.9	59090.8	58071.7	63271	60352.3	57540.4	52773.9	48445.9	52112.7
P70333	68262.9	38795	46546.4	22466.2	58962	45105.1	54005.4	66241.5	70777.9	58626	69356.2	61513.5	72784.2	49145.9	64422.8	70486	32201.9	35392.3	44521.4	49686.7	52100.6	49862.1
P70335	23136.3	23702.4	27866.1	23164.7	21432.6	21930.4	30259.9	33223.5	27543.7	32510.4	26820.7	22247.9	19703.3	31244	27306.6	29189.4	20182.9	18996.4	21858.7	27154.6	32000	25255.9
P70336	14844.7	8087.96	18489.7	23644.1	13488.9	15371.6	19557.8	29053.4	41259.2	28453.6	13098.4	22317.1	16369.4	29628	16971.4	16455.5	18897.5	14635.5	17166.3	9360.18	28762.7	21552.2
P70340	10481	9169.98	6289.73	6562.53	6052.16	5516.83	10782.9	NA	7719.11	6791.89	15542	7948.32	20551.8	8014.53	12030	17786.2	10916.9	9619.65	21404.6	30693.8	42760.6	NA
P70349	122169	164912	166353	98687.4	164478	118895	118960	185114	194191	197392	197692	168612	274984	274256	121764	180788	178985	186482	189951	291089	395106	189690
P70362	98976.7	115138	104361	106668	102356	97608.7	97639.7	86945.2	74585.2	86277.7	96319.6	96142	80724.7	84943.1	86340.2	88030.9	80126.2	75188.5	89697.2	97431.5	84989	102858
P70372	149128	139604	140863	136793	118546	129389	164197	125823	115894	147854	133961	141468	136457	152297	103035	175658	99331.8	101334	121388	118084	136748	119707
P70387	55488.6	19636.8	30759.3	35100	23233.9	23643.9	29022.4	48560.6	18476	36729.7	48175.8	34266.8	36422.8	25256.6	19527.5	43772.1	16144.6	19994.9	40774	41337.2	66795.8	36470.5
P70388	11215.4	13014.8	14600.9	16299	13845.1	12415.3	17256.1	13027.5	46304.2	16042.9	14601.4	16283.6	6273.45	15796.9	11123.1	10584.9	11746.6	11370.2	12008.9	10520.3	9395.02	13395.7
P70389	10412.7	9806.62	10751.9	12280.6	10841.2	18657.9	14746.5	15288.6	5259.15	14467	8653.06	3076.33	23036.1	10161.6	5123.49	21030.1	9085.03	13884.8	11930.1	16147.1	35303.2	10223
P70398	16610.2	20325.9	19442.4	23797.9	22006.7	19506.9	20037.2	21931.4	36337.1	19850.6	16380.1	20259.8	15368.8	22354.6	20558.7	24047.3	20032	24765.9	20874.2	17983.3	15872.3	25919.1
P70403	5818.77	9803.51	NA	NA	8079.11	3550.15	7373.45	3222.91	NA	4133.61	NA	NA	4722.12	NA	NA	NA	7265.64	5470.2	7568.47	11434.9	16629.7	6631.42
P70404	71027.5	77775.2	89174.7	103105	90829.2	55913.4	71506.2	55910.3	50916.3	39709.4	59855.3	63771.5	54479.5	122017	102194	69679.5	48493.1	55988.6	52950.7	38906.1	31887.4	70642.2
P70429	62280	22301.7	7459.34	16248.8	9087.51	9490.16	25106.1	28051.9	39978.1	37421.3	18867.4	26808.2	37750.9	1	62973	24565.6	33325.3	20010	21714.4	35718.9	68174.9	19451.8
P70441	134958	157115	61425.9	57791.9	52714.8	87832.8	121135	78092.6	219950	70896.3	108311	55995.7	83406.6	75045.3	57312.4	159890	97019.5	57095	65390.8	84794.1	197793	53558.2
P70444	50477.5	29300.7	41786.7	31806.5	43390.9	38646.2	50145	50925	50503.1	29046.1	44460.6	34513	34056.9	40900.9	49497.3	59397.3	19059.4	35157.3	55321.7	39658	48703.2	32891.1
P70445	18327	45555.1	65943	72915.6	23667.8	60559.5	65978.3	85327.1	81298	105376	72827.6	80089.6	17367.2	55699.7	40844.3	59966.9	63402.3	57618.9	131261	27414.4	61698.2	61532
P70452	27427.7	35298.1	24485.5	29599.5	28480.9	34332.7	31312.4	43531.2	117487	38362.3	45609.8	26618.3	39738.2	32468.6	20009.4	33324.9	22119.6	22959.7	42898.1	50882.8	57766.3	16919.1
P70460	44310	34442.2	11837.5	46813.6	33030.3	40098.5	20264.9	40576.9	85658.8	32250.3	37960.9	49694.7	21156.3	39336.6	18536.1	31270.6	69191.2	30972.1	31979.6	19139.1	31173.2	42912.6
P70665	18805.4	28376.9	36633.1	40895.1	34807.6	26279.5	5319.35	20042.8	49457.4	13973.8	36301.3	19180.6	32364.6	34526.8	75452.2	58710.1	9630.82	31701.6	17730.4	18867.8	12542	13512.2
P70670;Q60817	92583.2	139910	206739	120984	117950	300915	132511	160686	298804	299822	132850	61015	174550	172418	174965	165695	347107	258368	147742	402555	396873	189356
P70671	50027.1	29397.6	31429.8	33202.8	28537.2	37547.7	38545.5	51697.6	32623.9	49527.1	38053.7	47040	58056.4	32175.6	34848.3	58552.7	40534.9	38308.9	44237.7	53624	55519.7	33235.3
P70677	60206.6	55413.8	81877.5	79361.1	60765.4	77096.1	59096.6	60747	62776.8	65703.1	49554.4	62529.8	48365.2	44755.1	42033.4	33184.5	72201.7	70933.7	80629.3	46040.8	55050.1	75549.7
P70694	360381	377679	380651	442691	520819	395326	273951	324118	315366	335919	213847	307628	383602	250201	354082	221001	323721	331922	331103	176494	206392	382853
P70697	157332	129808	82264.8	69239.1	85678.7	124216	113604	119408	116512	129252	187571	128794	184136	105968	151412	139666	109660	93514.9	173613	177894	261079	84732.5
P70699	67286.6	59571.1	94257.9	68261.3	82111.5	75066.6	79109.8	53649.6	64955.5	54510.3	89051	100130	51663.5	72219.3	102943	75470.2	60440.6	75816.6	88132	60783.4	58125.9	88099.6
P80313	109657	111746	161875	190186	198345	113578	100026	179107	125481	156169	91820.5	111496	71899.3	154229	141650	111355	172725	191454	99672.1	130497	105620	148980
P80314	155581	102080	129128	98386.8	98382.7	139594	142940	156912	155899	185427	115843	110127	167708	94269	110087	131638	125393	115307	214258	170361	268369	79327.9
P80315	86265	86975.4	109309	96318.1	82297	76040.7	82819.2	84995	97884.3	83503.1	70050.9	88801.3	71127.2	100206	88086.9	58048.4	99182.6	87661.7	82382.6	69768.6	56222.2	88436
P80316	127932	120409	142055	144848	152819	138388	120062	130612	165868	131756	107773	111451	159128	182567	155303	110976	134627	134893	167857	113510	112674	150065
P80317	246137	175044	176964	177095	179012	154379	190529	166733	232714	220572	115659	144299	143893	155642	125194	127781	179594	162898	135062	190926	177770	199330
P80318	136501	133635	126395	106268	130500	128447	95570.2	115591	142260	124227	125672	100972	158481	101624	121200	121542	111167	112109	154569	165606	143106	102286
P81117	12436.9	18177.8	20635.3	16563.2	14712.4	13422.1	15341.4	9909.43	16316.7	19237.6	12278.1	12816.2	13202.7	9672.86	11728.4	11604.7	13241.1	10292.1	16722.4	22079.4	24254.5	10371.6
P82198	12140.1	15886	26370.9	16838.8	16800.2	21977.9	23493.7	25708.8	17983.4	67088	54965.2	56121.2	46501.3	70196.4	26657.6	61709.1	26683.5	23682	23477.8	18348.3	10044.3	31500.7
P82343	6637.84	4250.37	8323.32	11620.2	4323.46	5857.38	7160.03	7205.11	15936.9	2401.43	7327.12	9986.75	6186.28	18777.4	17808.5	2322.66	NA	17498.6	6992.05	10861	8442.18	18982.5
P83093	12613.8	15319.1	21099.3	16396.4	20028.3	12259.2	14402.9	14608.5	NA	12466.5	32039.2	10712.9	10469.3	11212.5	12405.4	7585.73	17349.6	12637.9	28952.2	13357	14981.8	19438.4
P83741	29669.8	7540.93	15476.4	3608.31	2218.88	7249.3	7325.07	15949.5	11591.1	7449	14367.6	13563	3770.08	21978.1	24054.2	10293	11077.8	1070.11	30282.7	9979.94	16748.1	23907.7
P83870	35504.3	15944.2	7973.04	49086.6	6411.82	38009	14822.9	7168.86	NA	7671.54	8924.8	38211	21197.7	10110.6	7953	23464.5	38600.9	12287	3353.43	13797.4	5020.34	35038.6
P83877	31188.3	31642.9	42567.3	38142.3	37653.9	32392.7	34368.6	31018.4	24038.7	13407.2	26760.5	29740.3	28589.8	29512.9	26566.9	21891.1	22187.9	21725.6	16645.9	NA	11805.7	31484.9
P83887	11037.3	12020.5	11258.3	10442.8	6778.45	6109.47	9324.14	4410.92	NA	7602.32	14503.5	9562.95	8780.93	13309	9077.74	NA	5094.12	9071.96	15314.4	14068.4	12361.4	5423.45
P83917	108650	47995.2	37437.9	34474.3	35654.4	42627.6	54938.7	47223	25175.9	99673.1	48852.2	56158.9	90996.5	56261.8	54481	13821.7	39220.2	35433.8	119588	83540	123661	49492.4
P83940	89785.6	86191.7	75404.5	77798.3	81719.7	88464.9	81219.2	82042.7	91118.2	85783.2	80120.4	68259.4	97499.8	81294.5	60114.1	66745.5	76950.4	73096.2	102306	97486.4	126542	77809.2
P84084	72974.2	62982.9	108230	59755.7	94358.5	113087	83130.8	46724	61883.6	81722.4	48636.2	65863.4	78512.4	128428	135393	84094.4	81182.9	84777	34416.4	55323.7	104142	58139.2
P84089	53257.7	57181.6	13029.5	29863.5	43087.5	50697.8	53799.5	32306	85546.8	38781.4	68333.8	38341.1	54187.7	152842	11877.1	31483.7	26270.3	34645.2	43784.7	50436.3	71575.7	40175.9
P84091	34365.3	49621.7	42256.8	43641	38917.4	66498.8	52192.7	45267.2	78244.3	90552.9	72840.5	52085.7	72986.6	51416.8	56187	68045.4	46391.5	34121.2	20934	54331.7	60499.6	38758
P84096	34125.7	39213.6	56202.5	66544.9	48993.7	53614.8	40132	47055.9	51461.6	53246.3	41648.9	42070.5	65869.2	83628	55638.9	57865.6	67303.5	54609	31724.2	30033.7	45932.3	56729.9
P84099	48010.3	62729.9	21440.6	46053.1	40179.5	18668.7	47730.2	14458.8	754352	14438.2	59265.2	21953.5	17991	18878.2	38635.6	79239.8	92429.6	31134.3	29112.3	42089.9	33903	28664.1
P84104	149526	122731	68405.8	158083	401634	367789	119897	415843	107755	595832	103545	460222	567624	61561.5	92147.4	116751	252683	131096	482774	253107	745250	242863
P85094	192856	95352.6	115012	91760.5	119618	91111.7	94224.4	115596	131206	111828	83778.7	166833	165607	221432	180948	155314	113700	78501.4	53194.2	113430	248941	84711.5
P97287	45330.6	30750.8	22392.6	17832.6	11770.3	17931	27407.5	27761.4	32645.6	27808.3	32025.8	28964.5	19406.5	10139.3	14600.7	5609.1	13189.8	22928.7	34610.6	40969.2	64825.4	18100.1
P97290	68971.9	52800.4	51874.9	65605.5	58378.4	49496.4	53344	41603.4	65980.7	38239.7	32503.1	41885	33146.1	38714.6	34458.3	27497.1	40469	32404.1	54944.6	36565.6	70943.4	58347.2
P97298	57010.9	42919.9	49647.6	35765.6	37988.7	46288.6	48830	49301.1	43778.2	60667.5	49692.5	56424.5	57618.1	34558.8	36204.8	25432.4	46681.3	51120.9	65253.5	45643.4	55202.1	60912.4
P97300	68934.2	75180.1	55361.1	58185.4	56900.5	61079.7	92048.7	49445.9	54119.2	50443.4	64967.3	46213.2	25271.4	28718.2	28237.4	50086.3	50975.5	53985.8	68991.2	84914.2	118088	57256.1
P97313	26741.5	28651	40222.8	52600	46349.4	54765.7	27602.1	38034.4	42796	43547.6	19202.9	49232.4	51687.4	32340.9	40321	NA	57924.3	53352.1	32785.4	NA	NA	49118.4
P97314	4774.57	9148.75	15555.4	9458.5	9900.05	2487.87	3348.43	4151.77	3017.25	4370.61	9966.55	4696.24	4060.06	24449.5	6191.34	17917.4	8661.79	8761.06	10000.5	11873.6	13105.1	9241.08
P97315	49252.6	11163.5	30585.1	20926.2	16174.4	7402.97	53081.6	11115.9	47330.3	11340.1	14914.3	9939.54	43779.7	30177.8	57732.2	20757.5	14018.7	12250.5	59793.9	58610.4	112314	12637.5
P97328	73967.8	86055.8	155166	129162	116724	110240	80873.6	137403	198089	120086	90396.7	113658	124249	107077	179384	86145.6	143985	180776	84864	190793	115746	158478
P97333	7325.16	7887.46	13928.7	12621.6	11733.8	4841.66	8062.33	8826.51	5337.62	NA	4551.56	6021.62	NA	NA	9071.34	6797.26	12765.1	11499.6	NA	NA	NA	8305.88
P97351	166801	174496	149775	148501	177690	200808	180192	175925	218835	170133	208240	159528	297506	209952	258807	429274	224975	196608	181464	212997	253915	163894
P97352	830006	622525	394297	397959	420161	587346	501048	498089	386422	495754	371151	470889	584701	264431	294164	280853	341375	280206	432307	522874	975432	251543
P97355	331272	357010	496253	7645.85	508672	438993	10922.6	5858.49	10628.3	546343	7673.49	NA	298468	312802	374972	265580	451375	467698	5218.99	384658	7934.29	7830.02
P97360	15041	25541.3	17894	17617.4	18194.5	5571.43	15828.6	11916.7	10871.6	12325.2	24092.7	10265.9	15449.5	17163.8	11838.4	20744.2	11976.2	15483.9	40661.2	37920.9	34339.3	11227.3
P97364	306741	282096	251572	171133	167398	157623	183157	207763	194882	216339	311716	337283	281950	263660	226650	171074	168731	181075	176814	106556	142748	142068
P97366	8866.82	12247.9	14092.4	16426.2	15663.6	16849.1	12587.7	10318	13540.8	15619.6	16958.5	16806	10634.8	23470.6	15493.5	17053.1	17203.1	14689.4	14039.9	14390.3	18369.8	15084.5
P97369	3338.39	4524.29	3623.36	12533.4	3375.24	4272.41	11314.3	5823.64	4560.91	8110.02	6776.96	4664.45	8169.77	7049.43	2936.05	5512.99	9135.3	4243.71	6766.63	5036.44	8013.45	5270.2
P97370	52991.7	53896.9	57572	53593.6	58621.9	55031.9	50107.5	66034.6	161709	35216.2	92748.6	67489	57928.2	80075.3	116877	68211	66366.2	42671.4	42585.5	56693.3	42320.8	34204.6
P97371	311872	260943	217547	249136	183867	254190	355877	303287	218667	336792	251162	250071	375816	175532	185245	202842	221495	214205	249054	309409	722127	203701
P97372	195827	131685	101657	83525.4	80852.4	193387	181050	207358	109265	280730	98974.4	111039	127343	49347.6	94848.1	42511.3	103568	63878.2	347797	269094	584465	143819
P97379	95348.4	73535.8	70317.7	56613.9	62993.3	56366.6	63715.2	62059.9	75259.2	55628.4	58292.1	50369.7	62071	48604.7	36109.1	41426.2	55059.2	55032.4	105591	89049.2	98856.6	57222.4
P97384	113340	78995.2	121728	87074.4	97197.9	81408.3	86325.4	120083	99245.1	96178	85533.9	136276	76273.4	78205.5	85447	75018.8	91095.6	103432	88923.4	57366.3	59735.6	106260
P97386	3827.36	3134.25	5850.59	7667.43	7397.6	5301.87	7175.43	4761.79	1848.31	4279.45	3097.02	3031.12	7605.91	4321.79	6309.97	5122.05	5244.99	5590.93	5095.93	4860.82	6607.44	6688.41
P97390	5884.74	10550.7	8966.01	16037.2	12703.3	17579	6701.77	9352.17	17356	13746.5	11037.9	5395.11	8649.52	15362.9	15394.4	11907.4	8307.19	8139.8	3323	9793.33	5720.69	8115.66
P97393	32705.8	18702.3	19010.5	19518.3	19544.5	13625.6	12612.2	12434.5	22352.2	11307.1	21566.4	16662.5	20945.8	18867.7	19074.8	14529.3	17548.9	20699.7	9400.14	12407.3	51089	14958.3
P97429	164667	164760	218601	165134	121768	182903	217366	179959	183629	148712	178056	172746	171789	166875	142839	133565	167404	183087	203517	113994	180635	195398
P97431	16803.2	20996.8	12616.7	11599.6	20867.2	13329.8	30372.1	13106	6150.9	13880.2	7824.86	9905.98	7371.28	1409.86	4473.86	10247.3	9893.55	12583	14462.2	19209.4	14151.6	10064.7
P97434	21565.5	17175.9	13130.5	15620.8	14336.5	15849.7	21794.3	17734.5	17518.6	23614.4	15653	21526.7	18878.5	10106.8	18160.2	19433.8	11846.5	11491.6	18100.7	18931.2	29119.7	14436.6
P97449	52068.9	47282.2	44092.5	37861.3	40510.3	61771.1	56290.4	74008.5	67647.5	77260.5	62225.3	56759.4	61534	52108.8	51500.7	57174.7	41119	44883.9	70040.9	72203.7	111668	58830.8
P97450	923333	701325	604083	535158	476241	624100	901375	554254	871555	737841	679634	627084	623824	486901	586019	741690	456656	480850	588094	822152	1.21721e+06	506321
P97461	187968	91008.7	120114	93926.2	129178	106130	136764	186379	125492	147522	144290	128215	226417	122366	176356	125257	120842	102709	132973	349174	232309	92000
P97463	312238	396055	824055	803757	917492	552358	505314	645477	492361	277499	323749	566268	288541	777726	505229	456153	584068	447672	124235	412432	246794	335817
P97470	17407	10516.7	21810.1	20473.5	16533.8	9899.25	10584.2	19200.2	110199	19650.5	8824.98	13437.6	NA	25558.3	4177.67	NA	21921.2	12196.6	11027.8	14145	11295.6	22140.7
P97478	50309.5	52645.7	36271	33891.8	28149.5	30326.2	42130.8	20665.1	23568.5	29053.8	52113.7	31320.5	27194.4	49982.4	38315	78629.9	21530.6	24468.9	52496.8	55324.4	64988	35659.8
P97493	212913	158341	116115	120105	126802	214932	171553	185948	157516	214915	194175	229658	325026	391366	137889	147313	175173	152963	195309	245228	385664	124361
P97494	67507.3	61575.4	89371.1	89477	98599.2	96725.9	69787.3	70472.2	110062	67627.4	71467	72199.9	61342.7	101736	69267.3	77098.1	88663.7	62888.3	60333.1	72034.2	83362.2	70465.7
P97496	8768.57	9792.13	6249.01	8301.06	5782.89	10488.3	9854.59	11648.5	14242.3	17037.7	13922.9	11551.9	6714.43	12693.4	5875.38	12824	8409	7849.92	14951.1	19141.5	29424.5	7215.96
P97501	120779	118488	152605	137185	115744	149025	97440.1	113162	123092	91763.8	138198	105369	142301	179041	146158	182752	108012	139159	69450.2	172778	85298.7	142423
P97742	52576.2	45831.9	89783.7	78473.2	113108	109937	42585.8	63464	108960	56506	28588.8	82055.3	69291	104508	77959.5	53154	120299	94283.7	28629.4	56109.8	37026.4	72594.8
P97760	14203.1	22388.7	19696.4	19292.2	17463.5	16975.6	17795	11105.7	15830	13715	19644.2	18719.2	9696.18	14911	20302.6	26494.6	14515.8	19205.5	21100.8	14471.7	10644	18324.4
P97765	103566	61286.4	54842.1	71113.1	44944.4	76417.2	53786.2	77512.6	79512.8	79868.3	82376.8	101371	106976	105770	79507.6	96571	64673.2	80728.6	127200	119523	167556	77455.2
P97770	23234.4	18662.6	30418.3	33690.6	29239.5	21742.8	28873.2	23283.1	58112.5	19170.4	22783.6	25706.6	32895.5	33755.6	27421.2	24222.4	28964.4	31930.5	24052.8	38747.8	35743.9	35162.5
P97785	5985.21	25282.9	3101.96	4655.8	4298.27	7634.6	6748.36	7739.35	6549.63	5928.77	18623.5	7475.94	13751.4	11313.1	11029	20328.8	7573.4	24903.3	11744.5	10494.5	21465.8	6197.68
P97789	15631.3	5305.12	NA	5054.38	2604.83	NA	3927.15	1	4794.95	1	3741.17	185.126	9533.64	3720.29	NA	1366.3	2391.88	2152.11	1	11185.6	24454.6	5189.75
P97792	53276.3	46041.1	35711.6	19670.6	28402.1	54341.1	34320.8	37300.2	24245.9	28914	49599	23581.7	36011.9	36537.1	25095.5	38228.8	28869.1	31920.2	76041	77043.5	97901.1	33845.3
P97797	62869	34230.9	43773.3	57861	31756.4	15899.6	61213.3	36534.5	NA	23559.8	60593.3	45207.4	69657.7	14444.1	22713.7	23573.4	29599.6	30118.9	39636.7	11300.5	54422.3	51599
P97798	5588.93	7128.6	8858.95	6988.77	7754.66	7773.34	7427.46	4019.28	NA	6614.58	8014.05	6583.46	8808.83	8308.57	6195.03	7721.18	7098.23	7210.2	12893.3	5009.01	7611.25	6382.35
P97807	134339	197818	155926	141168	177738	182895	164996	204052	389528	217608	193257	187537	186577	254095	198536	203994	180998	181591	198498	169462	274700	162722
P97819	5800.99	22529.4	16539	21242.9	17718.9	14893.7	13691.8	15295.7	22756.1	14185.2	18183.7	11559.2	10078.5	26957	23310.9	23981.3	28893.6	27084.9	12013.4	18450.9	10997.7	17635.6
P97821	165788	42070.8	113188	157122	104436	111759	101273	128000	99022.6	67901.7	84625.2	103941	85463.5	66195.4	117815	62150.7	146885	57109.5	35851.7	131081	190591	70298
P97822	69217.8	64008.8	38556	43553.9	36457.4	38140.8	42603.4	44675	37986.5	47378.2	68572.5	62796.2	49782.3	61124.8	37997.5	109876	29913.3	44055	71726.7	87851.6	82214.9	46422.5
P97823	324575	284694	235643	211217	235139	431735	393303	304512	167753	471510	259914	276962	511276	292943	215312	212488	292144	247155	540968	558230	589795	256725
P97825	24167.1	12921.5	NA	14562.2	NA	15215.8	NA	7887.43	13286.8	18916.1	NA	16148.3	6778.9	NA	NA	NA	16592.1	12928.8	NA	45300	49460.2	15571.4
P97855	124698	122340	73945.7	87445.6	77906	88452.6	85735.8	71444.8	164673	91952.4	118324	85728.6	107084	86898.8	87812.8	108792	73898.5	97680.3	144841	159891	199871	80471.4
P97863	15834.8	20872.6	15342.3	14716.6	16057.1	12902.3	23713.9	33662.1	51338.8	13582.1	36997.8	13541.2	21288	33577.7	15589.5	15891.9	14703.7	19387.6	20021.1	27513.6	36264.8	10689.4
P97864	44190.2	30085.8	39021.1	30152.9	34314.7	24536	44462.6	39191.2	41032.9	46706.5	49799.2	32164.1	38015.4	44331.8	30122.7	69405.5	28420.2	41308.5	55036.1	55784.5	70594	47199.6
P97868	7472.34	8017.83	6565.24	4667.34	5596.81	5800.6	5376.15	7241.82	NA	5514.02	7499.69	4438.67	8054.86	4413.26	7731.18	9920.38	7744.45	3838.27	5189.15	7636.22	6947.5	8337.81
P97872	47167.6	76721.7	70465.6	108960	93755.2	70418.9	52247.6	109524	64056.5	63643.1	92173.6	70873.8	97539.6	118578	115056	118670	103805	104142	87127.6	128627	115590	88309.6
P97930	47702.6	44429.3	34069.6	46192.4	43227	30905.8	36797.2	34512	33915.6	41276.1	49978.8	55374.2	43100.9	54098.6	40957.9	55388.3	39104.1	44755.7	64160.8	29696.1	23496.6	45786.1
P98078	95844.2	72786.5	49301.1	74865.6	48666.4	54480.9	77154.4	66016.8	73326.8	70527.1	69738.7	57002.8	51573	30860.6	29603.2	36356.9	67215.2	47063.9	62633.4	75142	94841.8	53539.1
P98083	46432.1	41580.4	52411.5	35345.9	32385.9	43874	31027.9	64970.4	52665.7	74399.6	21795.1	48303.5	55592.1	22203.6	13785	23662	58257.8	35107.5	75115.4	94004	110364	45501.3
P98192	1670.84	3775.17	12246.7	7439.13	12415.5	4100.16	5950.01	5449.88	9650.84	5636.29	NA	2862.3	NA	14983.7	9903.38	4847.06	7034.58	10739.4	1383.38	3009.13	NA	14666.3
P98203	29527	37326.6	27489.2	23723.3	23445.4	28407.2	37039.2	28845.6	30750.6	43819.9	44444.3	38624.7	34345.3	39171.2	32881.3	47627.4	28715.5	22551.4	21422.6	32449.1	36221	22478.8
P99024	798920	730406	556217	708319	445060	562163	645836	607602	725457	780171	796865	677302	741450	758931	561980	888825	616177	549768	1251351	1.22878e+06	1722828	700278
P99025	68754.8	82433.8	120223	100354	100708	120711	65877.8	102886	101925	90530.5	64823.9	97775.8	109194	157501	130174	107297	115067	98680.7	58804.6	77723.8	57993.2	79579.8
P99026	198474	140184	175076	109813	211475	283766	254613	310680	76105.2	272070	133832	240842	163240	120112	149160	68737.5	221559	193022	255932	147942	205813	204364
P99027	472076	410090	422888	401354	491125	666598	375436	553331	947007	549865	415047	615545	546994	782232	383829	226010	539529	391313	637796	781637	1.0181e+06	451557
P99028	323108	258856	172845	177356	171632	234970	266999	265982	2606864	207866	333516	241741	423475	253676	273493	331351	217182	214990	514582	749489	815837	172926
P99029	3382518	2823055	1.96707e+06	2.07156e+06	2.15769e+06	2.01936e+06	2.84154e+06	2.21927e+06	1.92581e+06	1.96624e+06	2.82241e+06	2.14882e+06	2426831	1.5876e+06	1.74742e+06	2.14873e+06	1.77055e+06	1.95042e+06	2.66098e+06	2019118	2.9768e+06	1.73132e+06
Q00262	19015.1	10480.6	9485.46	5781.42	8641.07	14216	9882.07	14803.8	14090.1	13054.5	10773.8	13729.8	11833.5	15212.1	13250.1	7584.78	9670.68	5988.42	15589.3	13709.5	26130.3	3644.55
Q00422	15843.2	20139	11381.5	21606.4	15720.8	11203.8	25656.5	14193.8	20466.3	6744.97	14751.4	13020.6	8691.66	5968.28	5521.51	9987.07	15325.9	11056.6	16292.2	23637.7	23749.6	13816.8
Q00519	52154.1	56183.7	93901.9	111363	89286.8	87502.1	43699.4	66504.2	84549.5	54965.7	53093.4	53992.7	44376.3	75385.1	69823.2	59532.6	85751.2	74131.7	28749.6	69337.4	54036	84040.4
Q00560	27056.2	26678.3	21745.3	11848.6	9446.06	20253	31464.1	21642.4	26022.7	19247.9	18083.5	9003.71	42715.3	22677.1	14933.4	29350.6	12323.8	12652.7	21903.4	34916	40339.4	11511.9
Q00612	39678.7	18041.3	46364.9	32836.7	28209.1	24564.9	21115.6	25705	54282.4	38031.5	25459	33974.9	38220.8	34757.6	33991	13256	50056.3	35140.8	135552	84792.5	43020.1	52200.3
Q00623	214541	124567	127364	162296	109720	282810	146360	403182	529332	154435	276205	306321	601222	431589	331705	477483	82756	175059	149011	218994	439917	192328
Q00724	157196	56033.9	42246	34262.9	31229.7	29950.7	63443.3	37840.6	105314	52570.1	81927.2	87690.3	83816.3	64793.2	78106.1	44964.8	67798.3	46796.9	32365.5	27485.4	33376	53940.5
Q00897	391066	131982	117834	83862.9	119338	173580	184818	164936	121732	121426	140641	179596	317921	230357	238693	220830	113303	157146	186770	213589	298207	114852
Q00898	38457.8	36794	2111933	19066	40055.1	10696.4	4114.34	5.62987e+06	4029882	4.61368e+06	5122712	5214159	10977535	6.52436e+06	7.46043e+06	7689550	3.66604e+06	3.45547e+06	5.5765e+06	7366253	9593238	1684763
Q00915	163295	164664	127271	118036	66248.9	123282	152380	59017.2	127605	170717	180768	156102	172311	328242	107596	234667	90585.1	80942	80455.7	70956.4	124659	104141
Q00PI9	53795.5	70900.1	79428.4	66626.2	69958.2	84281.9	78487.6	93054.8	47998.6	108022	56567.8	77230.5	65108.3	100434	89132.7	113300	60119.2	62290.9	29597.2	57743.7	38685.3	76276.9
Q01147	39869.6	32660.3	22949.9	26516.3	24681.4	26969.1	34262.1	35046.4	34921.9	39589.5	44323.3	34164.1	37481.5	25504.9	30686.7	35683.6	26203.1	22088.6	34284	41445.5	69202.2	20477.4
Q01237	7765.96	10569.7	17878.5	22430.2	12072.9	6207.2	9351.25	11800.9	16850.8	7520.46	22536.4	30394.3	14810.1	20781.1	15498	11330.4	16535.2	17221.4	13787.3	21836	2876.85	7833.46
Q01279	86366.5	75913.8	49178.6	52114.2	105973	59100.4	29979.2	39646.1	25494.3	34323.3	33461	21282.9	28190.6	43944.2	19839.2	53459.8	31787.9	30951.7	62241.1	37711.7	49552.5	33954.1
Q01339	274214	214968	174541	188348	158729	218496	271608	215782	216670	174835	383612	282596	419749	228827	395427	500754	165525	177731	282261	270983	304511	186708
Q01405	51447.3	50032.8	68185.1	65001.4	68466.3	84473.9	40135.4	61722	118743	76746.9	46967.2	51073.1	61384.9	74791.3	52038.5	64737.4	78685.1	57426.4	30418.4	66370	50507.4	54272.9
Q01514	18518.9	10263.8	12401.1	56947.9	12172.7	14470.5	15688.9	68394.4	NA	27507.8	NA	30829.9	25109.8	NA	32238.7	NA	7185.43	12992.4	39063.4	39844.3	60967.9	11227.5
Q01705	976.928	1317.61	1198.36	1384.39	1041.53	1194.28	1743.73	NA	NA	2212.25	4472.29	2046.04	2227.35	2434.97	NA	2855.86	760.334	1025.94	1391.6	1582.86	2511.02	2673.76
Q01730	113930	124618	143789	127990	128421	174954	139552	203061	189910	264400	169801	204423	243488	147931	116106	150295	149209	127032	170683	214242	306826	133867
Q01768	1.57741e+06	1.4823e+06	1.21551e+06	1.43913e+06	1.31419e+06	1.43363e+06	1.61584e+06	1047888	665431	964455	1.19925e+06	1.30853e+06	1.36816e+06	1.04355e+06	1.23911e+06	1.84932e+06	1.17234e+06	1.22053e+06	1497019	1.4395e+06	1.9125e+06	1.1589e+06
Q01853	259620	259572	197874	202155	188764	185543	234758	151334	238188	147128	209055	156886	193866	148628	199487	206641	168035	203165	227369	217650	223985	199651
Q02013	90740.7	123447	200662	164234	173215	152812	87590.3	133671	302460	100086	112106	114161	110481	307124	227219	127666	138743	130147	40913.6	95671.2	72061	123356
Q02053	222388	178421	139299	157138	130291	161030	171480	176375	146602	194083	221850	146682	195608	156493	160067	181900	145303	168568	237137	231616	211626	115102
Q02248	46915.5	58441.3	71160.1	86533.7	77112.9	67184.9	59817.3	71047.2	66063.8	66482.8	42180.5	58647.1	38113.3	81235.2	65597.1	65130.4	62937.4	42062.5	24303.2	29178.1	28852.3	48587.8
Q02257	26913	32494.1	32452.2	29746.7	31676.2	29536.7	37644.7	49363.3	45988.8	46952.8	49667.3	39192.1	31135.6	44092.6	42999.3	39513.9	35123.7	28366.6	32495.4	34960.4	36066.2	27639.5
Q02357	19781.3	19656.2	24120.9	15442.3	16400.9	23039.1	19894.6	18843.3	21369.8	14037.5	15481.2	18823	72795.4	45008	57151.4	26967.6	22655	13857.6	11275.5	15060.5	12459.3	12796.9
Q02596	82765	NA	NA	87702.3	NA	70046	NA	3834.42	NA	1604.86	88407.7	NA	NA	NA	NA	NA	NA	NA	NA	NA	NA	34924
Q02614	25803	24925.8	21043.3	18147.3	15580.4	26359.8	24031.6	24610.8	15789	32533.8	28172.8	38591.1	32420	101698	81568.8	18272.3	24724.6	16499.8	29152.7	42345.2	46973.8	14811.8
Q02780	17932.9	15887.2	28966	28890.8	34759.2	36216.9	18284.1	29373.2	NA	26954.5	17162	35701.2	15468.9	40257.9	40166.5	26068.2	29260.5	33671.4	22612.2	21882.7	24120	24486.1
Q02788	5095.31	16875.4	26499.4	22875.3	25885.2	14700.4	23610.4	17001	38183.6	93871.5	53929	43983.3	20632	36270	24386.1	44169.5	6467.37	14513.3	40653.8	31655.4	20841.2	55141.5
Q02819	121546	101359	74514.9	88679.1	74452.1	90379.2	110961	84426.1	136816	90295.7	62413.3	92165.8	105811	50217	73670.6	83922.5	79594.8	84500.6	135405	167533	181452	92061
Q03141	3202.42	7417.71	6588.45	3682.65	4565.27	6994.33	7651.4	6294.07	NA	NA	8750.2	3917.28	NA	9486.08	6344.44	9013.41	5058.9	5771.23	4047.36	4940.72	4087.57	5715.63
Q03160	20173.5	16113.1	12082	11635.7	21435.3	17384.9	20192.1	14622.5	24751.3	15057.3	23399	14685.9	13939.7	35017.5	27632	18535.9	21454.8	18399.2	29192.2	22677.4	18217.8	14930.3
Q03249	113144	108917	115262	90867	107039	112476	118626	88242.2	75320.2	81615.5	125031	113757	110427	89552.5	101810	114412	100575	121318	191799	104167	75990.4	105865
Q03265	97622.2	97328.6	101593	114018	107540	171061	91242.6	147601	373338	207085	175645	101454	468352	163543	190116	244689	156607	117980	172690	252988	546750	108533
Q03311	79265	49813.7	68890.9	76435.9	71992.6	73732.3	46099.5	88291	89082.7	76745.1	60755.8	87167.1	68576.2	79629	73058.2	69395.2	91410.8	93475.4	45399.9	76487.1	66700.8	109049
Q03734	100261	67229.5	72611.6	75078.8	97186.9	59342.3	90658.4	64992.5	74183.7	70271.4	61827.9	61917.9	107154	132501	152269	86312.8	113798	64405.8	47168.6	72817.5	71295.9	70528.9
Q03958	158705	120545	86762.7	77903.4	94796.1	143219	128550	146249	114136	134964	141282	112531	140188	91302.6	78442.3	106595	118150	95686.1	216164	245690	342153	114474
Q03963	30444.7	26428.8	24515	21089.5	16553.2	19186.5	32364.8	29482.5	28114.4	20163.8	21854.1	21022.2	15795.9	11134.3	11833.7	18880.3	29929.2	18615.5	23468.5	24239.3	30856.1	27301.4
Q04447	156294	114770	161906	146499	76911.2	103046	159693	111212	109495	180746	128032	105196	116460	87394.1	65799.5	127324	103070	87292.9	141034	158979	201348	87933.4
Q04519	10655.1	6675.87	4988.65	8287.07	6122.83	10000.3	6030.07	NA	3491.38	7818.83	7707.8	4836.56	7141.52	NA	5183.68	8744.74	5562.56	6402.98	10045.8	10079.8	12741.9	5607.96
Q04736	7159.25	7028.75	8785.84	14986.2	12510.4	7044.89	13478.7	10099.9	19676.4	5036.01	6977.2	6266.11	6859.58	11001.8	4028.24	14348.9	10713.3	14648.8	6415.74	3279.45	8791.91	18379.2
Q04750	84590.6	73661.2	74774.6	91266.8	60260.7	75698.7	96610.4	90770.4	97963	80477.8	103775	95244.9	95085.4	92197	97153.4	86302.2	72037.2	80257.8	101031	66507.1	73656.9	83386.5
Q04857	12632.9	22218.2	18891.9	19159	30750	18114.8	14891.1	18061.7	38871.5	72249.2	32654.6	35234.9	19937.3	39669.2	22809.8	27866	14182.2	22439.1	23923.1	21472.5	27119.3	28468.1
Q04899	2398.65	4189.63	NA	NA	4046.65	3117.49	4990.94	3789.08	2915.17	3422.76	NA	1031.42	4695.36	2606.81	3697.32	2503.13	3197.18	6220.63	4868.95	3872.6	2058.72	4804.7
Q05020	102836	10181.1	42484	14261.2	37052.6	13832.8	49762.6	18947.1	18365.8	10320	17320.7	17455.7	20710.2	8152.35	14180.2	14727.6	9589.14	70852.8	19953.6	25146.1	27610.7	44770.9
Q05117	77087.8	72265.5	85524.8	84895.7	113977	100854	83478.2	95092.3	126395	98981.8	101569	106016	82986.8	131830	98715	120815	103395	101022	76043	77642.3	91410.1	117277
Q05144	40116	35990.9	35004.6	75507.1	30447.3	56430.1	34607.1	54500.8	71820.4	73922.1	33155.3	55694.8	67009.3	43934.6	41747	35288.6	70553.8	30045.5	19491.5	49961.6	39031.6	33540.5
Q05186	31337	46445.9	25445.6	45677.1	35175.6	20372.6	36461.9	20104.5	52421.1	48618.3	22207.7	18185.8	33070.4	17054	29799.1	30732.1	53693.5	25105	26776.8	33482.8	48137.9	21992.6
Q05421	119681	167850	107985	104027	162953	110343	130477	94917.7	179905	86354.1	102757	110792	174915	91115.3	128000	118619	110836	110979	86028	75207	72323.3	95012.6
Q05685	50161.9	22693.3	14498.2	18986.7	2409.52	7801.49	41503.1	20985.8	10817.6	16897.7	19379.3	13525.4	43945	3638.48	6351	7102.83	15566.1	4695.62	20688.5	5379.72	41387.4	11503.1
Q05793	43297.8	37092.7	51505.3	52972.6	45132.2	44402.6	42500.4	41390.7	76049.9	47399.7	52401.9	58202.6	41368.7	50737.2	50039.9	54484.5	37663.5	37637.1	28512.7	39857.6	36601	48902.6
Q05816	211290	90148.8	29522.8	168983	171182	74108.9	137931	191882	195577	110523	96829.6	70449.3	72098.5	48069.4	51249.5	97493.8	62945	90488.6	418677	90651.1	90236.3	127653
Q05860	551240	610211	527999	546589	556713	482315	607922	516129	519485	555372	521684	450942	370762	461535	357922	326751	509284	585040	669990	523836	515586	547123
Q05909	12867.3	NA	7071.02	NA	NA	11623.5	11286.7	11484.9	NA	16562	NA	8277.56	10761.2	NA	7411.58	NA	5544.23	NA	10838.8	17285.9	17919.9	9613.01
Q05915	45671.2	47473.7	79419.6	62431.1	70268.4	69799	51480.6	63359.2	53229.5	40097.9	42510.6	54686.8	30563.2	65527.1	59070.2	35387.8	48767.4	49471.4	25348	30703.5	35915.5	59902.5
Q05920	188995	202526	298092	274044	240496	328202	225192	346279	265606	261509	167172	270791	257424	318496	298996	260594	278067	282222	202857	186930	272942	232170
Q05CL8	11786.4	13411.6	12252	12939.1	14364.2	12738.1	13575	9875.37	15032	11853.4	15130.2	12103	9487.94	20118.1	10392.1	18588.4	10189.7	11129.9	8344.57	11683.3	7050.5	10205
Q05D44	64799	55649.6	61083	61382.2	62154.8	50807.8	57829	56143	68861.4	51045.5	52890.5	56451	60812	55726.8	49814.3	53250.1	72329.9	61054.6	60154.5	46665.5	50279.9	55733
Q06138	21400.3	13960.1	18810.5	12239	11594.3	16656.9	19154.3	23955.5	47186.6	23199.3	24927.4	16645.5	21672.2	17146	15692.3	16138.3	10656.4	16281.1	18070.6	20769.4	39130.5	17572.1
Q06185	171450	161894	171310	153026	164628	270001	162193	188340	96008.5	167650	153345	262214	317941	191144	191500	187439	193009	159821	244156	225732	421160	163179
Q06318	103708	34788.1	22646.8	19923.2	19284.6	127473	25422.6	34200.3	33987.3	16000.7	30394.2	85584.1	41680	75689.9	50117.3	15821.2	13242.7	8893.59	16577.9	22401.7	42808	18868.7
Q06335	9598.5	11343.8	6989.06	9513.74	6002.88	8643.23	8207.23	9451.18	7901.48	7430.63	9705.38	6974.14	8627.97	5344.1	7378.09	6874.3	5957.32	9767.13	10451.2	15808	22097.8	9695.49
Q06649	2646.3	8493.5	9533.11	11919.3	15247.3	7536.33	7608.96	6046.04	NA	6135.47	NA	4981.39	4635.46	874.248	3210.12	3975.33	8695.57	8935.11	2586.89	9071.17	3953.19	3341.34
Q06770	57627.4	55335.1	52065.6	51783.4	42047.2	78481.7	79953.3	140902	149691	164444	50969.9	49770.9	280173	32468.4	126987	221761	74221.7	65527.1	72727.6	201293	335892	203293
Q06890	36873.6	17322.9	25351.8	15329.6	19081.1	21798.4	24550.1	21776.5	33922.3	24698.1	34904.9	21103.7	47397.2	84890.4	49862.2	42597.1	15892.1	12939.4	31320.7	23677.7	53499	17627.5
Q07076	102820	90426.6	80694.3	96389.2	108218	94594.9	91076.5	95832.3	166797	109732	91709.9	82855.1	103340	58153.1	83858.7	76747.5	71429.2	80955.9	113349	98006.4	137980	76024
Q07113	10626.6	10450.5	12236	9542.37	9082.46	9197.76	9661.29	10965.5	47858.1	8618.49	9165.65	8277.12	6702.06	10358.2	12833.7	10505.7	11378.7	11568.8	12231.6	15311.7	8367.12	10926.1
Q07417	349306	449927	630140	497125	509572	434845	420461	483429	490719	367199	393189	509366	403674	538244	770776	366922	651837	487477	335823	316113	257442	426159
Q07456	27467.6	23836.8	35166.5	48779.6	39930	41888.8	31027.7	42057.1	65048.3	37797.9	31368.4	34119.4	31297.2	43009.9	66139.3	53150.2	61857.5	42425.8	39651.1	47979.1	35629.5	48602.8
Q07797	46466.4	49324.4	38605.3	45404.1	37368.5	47412	60982.3	53027.5	47940.3	54396.9	40331.1	42634.4	60881	41193.6	35772.4	47683.5	46729	35967	49740.1	94541.7	149938	40167
Q07813	22987.2	18776.7	25157.5	22233.9	27617.4	15896.2	26186.2	18033.5	36223.3	15987.3	22598.8	13804.1	32135.7	14015.5	32473.1	37401.9	25739.2	30491	28661.1	33125.9	37918.7	24757.8
Q07968	18269.2	24750.7	27340.9	22623.8	26941.2	24795.4	21269.1	15815.4	NA	12097	15680.8	9850.22	12190.7	30451.1	41131.3	45363.2	10999.2	20259.1	NA	4766.27	NA	22164.9
Q08091	81946	63504.3	52527.7	54663.3	30489.1	38721.8	75713.6	71322.4	28162.5	40927.9	80995.4	63812.8	31376.9	47126.1	44846.6	32127.4	44889.7	37589.7	25513.8	56489.2	73082.4	83973.7
Q08093	24988.2	18826.8	11940.9	24298.3	14470.1	19646.4	32402.2	27541.7	22386	41874.2	18387.4	20278.4	42273.5	22683	26913.4	56407.3	22992.5	19199.4	37854.1	56130	65913.3	20640.2
Q08288	28102.8	28138.3	25493.1	11665.1	10149.4	20276	18480.7	6597.39	29909.1	8733.56	31016.3	7698.43	6568.99	15161.9	26754.9	14741.9	10142.2	8201.3	32613.9	15775.5	18434.3	22956
Q08481	19680.6	20380.8	25821.1	27460.7	24546.4	24157.1	18554.7	21953.5	24285.3	18745.3	14387.5	18491.8	26762.2	29914.5	25560	25762.7	23695.4	20514.2	10790.2	16581.8	11443.6	19845.4
Q08857	129224	134798	149365	77007.7	119139	137931	202779	201024	291705	250897	211059	237568	425442	161235	163049	207115	162343	141334	187002	448022	550827	352666
Q08879	9143.25	9176.09	20131.4	16804.5	19093.7	14370.6	12573.3	12070.4	23168.1	17513.3	10445.5	15015.3	15056.2	13904.7	9010.07	11024.6	20774.1	16154.7	11534.8	14087.8	13432.1	20331.3
Q08943	38508.5	39399	42224.4	45570.2	32169.1	54098	60862.9	48770	45657.5	51988.4	40014.4	32466.7	54034	41176.4	46956.5	50442.2	47187	42769.3	41495.8	48353.8	66573.8	50545.9
Q09200	46972	91115	79153	103289	89552	64082.3	50306.3	79428.9	58297.7	63418.2	57025.3	57350.1	59964.8	51539.7	51167	64947.3	95941.1	108007	44768.4	75365.3	38785.4	78767.6
Q0GNC1	15659	26149.3	15430.2	19604.9	13267.3	16538.3	19128.2	20735.7	17043.6	17406	26154.4	17523.8	26439.2	14135.7	19022.8	23106.1	28182.1	25606.7	30160.3	32053.3	40843.1	26684.3
Q0KL02	13676.5	12406.9	9657.91	13880.9	NA	11179.6	13642.6	12640.6	11969.9	15210.4	14518.6	11468.4	NA	12912.5	14177.8	12485.1	11403.7	13242.4	12412.3	17271	19273.9	12245.2
Q0P678	19582.3	13316.8	11079.2	9884.62	11841.9	15289.4	19287	20077.9	20645	20778.3	10179.2	14839.8	16695	17399	15454.2	26883	10640.5	10992.9	16989.8	20029.6	34060.7	13179.7
Q0VGB7	24295.1	10943.6	18257.6	16861.7	17592.8	20840	22760.6	14045.5	16328	22116.4	26803.8	19547.5	24830.1	21019.9	15746.4	18168.8	10587.1	7752.83	16668.7	16589.1	25199.3	13315
Q11011	58356.3	51368.3	84815.5	84401.6	82181.6	57171.4	50734.3	61020.7	103845	71875.1	53221.1	71634.4	51415.7	72881.1	70830.2	51319.9	68473.4	67387.2	46286.7	36098.1	38968.7	66137.8
Q11136	55472.7	34475.6	63164.6	69102.5	63028.1	51655.9	32145.6	80305.5	58144.7	68900	27881.5	65360.3	34280	43878.3	85276.5	40172.7	59910	54664.9	30556.5	61301.9	43935.2	83856.8
Q148V7	14925.8	15739.5	13290.3	15452.6	12629.9	12406.2	16915.6	16049	13556.9	19464.6	13303.2	14305.7	15216.6	14326.4	11804.8	17119.7	13565	13179.1	15770.1	24214.9	29158	13481
Q148V8	3547.02	3509.18	6204.05	4210.24	7929.79	5264.48	11421	8273.2	10479.1	6780.18	5012.17	7910.41	2492.88	2254.4	3729.84	6737.84	4981.35	7393.96	4203.28	7307.99	6521.61	3753.4
Q149L6	12424.4	12503.9	10338	11357.8	10284.8	12268.4	12589.5	8358.93	11368.3	11589.4	9774.44	6527.05	7869.21	5806.12	32343.6	3084.7	9685.24	9515.01	16520	19944.3	24429.3	10382.7
Q14AI6	45711.2	46952.6	27198.2	36450.1	35458	34759	31444.2	24743.5	16695.7	19576.1	35624.9	21868.4	22036.1	18340.6	25484.9	29612.6	26210.2	26657.5	43744.5	50767.9	45444	25666.3
Q14AX6	10453.2	5412.77	NA	8072.47	4007.14	NA	NA	3529.72	NA	9366.53	NA	NA	NA	NA	NA	NA	8356.74	NA	NA	11518.9	7974.68	NA
Q14C51	70951	83371.9	79480.5	66505.3	51240.9	72157.4	69067.4	64284.5	66900.7	59260.9	89748.8	77249.8	72307.5	123024	65594.3	124840	73635.5	61576	111241	68768.7	59833.6	57760.8
Q14CH1	30159.7	26974.2	29723.8	33055.7	31202.1	40230.7	21786	25981.5	50714.5	42426.6	15866.1	34963.4	16663.3	28690.5	42049.6	33171.7	36484.8	30641.2	33483.2	52179.2	24734.3	40692.1
Q14CH7	18844.5	23468.7	23805.7	21129.7	26764.8	17176.3	24472	21299.5	20394.9	20903.7	26542.4	21065.7	19411	21248.6	22413.3	25237.6	16519.5	21743.9	31128	17201.3	12687	23127.6
Q14DH7	76678.2	109595	110411	114947	113122	80277.5	100802	101606	107067	64317.4	50018.9	49432.6	62307.8	59447.5	94647.9	65410.4	88032.4	104135	28825.1	59855.2	58355.9	88051.9
Q19LI2	113808	145371	93299.3	73088.4	58140.3	77000.2	238880	333757	289798	268392	115833	113486	427040	178360	163459	170284	119130	96390.2	210060	328007	650315	222509
Q1ERP8	32274.6	28344	27842.3	26874.8	24598.2	35361.6	33272.5	35010.3	25514.2	37988.7	40169.7	41061.9	52719.8	48016.2	29583.5	53865.3	18629.2	24034.4	31821.2	33023.7	44184.3	22208.3
Q1HFZ0	55219.6	44008.4	30681.7	32364.6	37376.1	46678	49858.5	39164.5	37572.2	38197.5	63200	35199.8	41895.7	58736.3	34258.2	79088.1	41243.1	32715.1	69923.5	68202.2	57812.4	30332.1
Q283N4	72512.1	76485.7	51386.7	46456.3	53996	88902.9	69536	74962.8	99175.2	73274.1	85049.9	57455.2	86512.2	96482.7	45518.9	113730	60010.5	46487.5	56223	103081	107985	55551.2
Q2EMV9	12327.4	20630.3	29912.2	29860.4	29655.1	19022	19945.2	22815.3	33117	23453	19303.8	13206.1	30111.2	23952.8	11815.5	10494.5	24133.9	18612.5	11642.5	30425.1	17815.5	20285.8
Q2HXL6	22594	31482	15479.7	23219.4	19535.1	28120.1	28932.4	26217.7	13218.6	23343.7	29431	20579.9	22024.3	14495.7	21612.8	27899.3	16282.8	19577.4	41832.1	44523.7	43742.7	30438.2
Q2KN98	8659.12	8440.97	7752.37	8888.73	9107.14	10818.6	9517.06	13492	9117.11	13768.6	85794.2	13405	9141.22	17907.2	NA	65345.2	13398.5	2081.24	10910.4	11545	22531.1	11785.1
Q2NL51	6257.31	9090.93	11612.3	11722.2	12255	8791.76	9168.73	6635.24	60853.3	8613.96	5555.91	6209.29	6844.55	13737.1	11009.1	8317.05	9177.28	9689.8	3617.96	9137.39	2777.76	20440.3
Q2PFD7	59667.8	45058.4	NA	47929.7	NA	38263.9	16471.8	NA	NA	27369.2	NA	38678.9	13439.8	56905.3	NA	42027.5	27444.3	31846.2	28454	58736.4	20061.8	47477
Q2TBE6	12508.2	16989.9	23376.9	20340.1	24661.7	18603.2	20880.1	12486.6	43782.6	14364.2	25488.5	14351.8	13144.6	20210.2	19765.3	15285.9	17382.8	19541.9	27830.8	15150.9	9059.63	22777.5
Q2TPA8	76632	79097.9	88575.7	84851.3	98573.2	79076.8	109626	98658.6	120694	78655.2	89805.8	82875.6	81515.1	125452	101176	86310.5	92791.5	112600	55951.9	92309.5	95982.9	103925
Q2VLH6	36701.6	25501.5	16084	43767.8	19771.2	25165.2	34953.9	1394.59	20434.2	1	NA	NA	NA	13226.1	5620.8	NA	7912.72	7021.46	7680.21	11982.9	25955.8	NA
Q2XU92	706158	738099	727791	647347	713199	601749	676136	503136	648877	581863	947886	912269	837293	997204	811155	871691	636172	710346	801557	403857	281422	745761
Q3B7Z2	56894.1	71078	72201.4	64206.5	68062.3	69258.5	75239	61794.7	60446.8	57338.4	57290	55937.1	48701.8	66730.9	65920.6	66691.9	68883.8	77584.9	45233.8	97162.4	85002.1	75773.2
Q3KNM2	43206.7	46701.4	55220.4	64730	53873.5	53205.8	32096.6	39610.7	41717.9	39876.3	38492.8	34131.6	32564.2	56427.1	72077.1	63479.5	56772.7	6253.85	30450.1	58275.5	38725.5	66067.4
Q3TA59	32622.2	18638.2	5976.93	12878.4	14669.7	17472.8	6412.32	17384.4	22718.3	19085.5	47780.3	1601.19	32333.2	8808.84	NA	NA	13990.4	19756.9	18011	23646.3	29336.4	14681.8
Q3TAS6	141745	122215	118125	119661	113279	146331	131873	137440	163446	133237	120758	127586	126117	110789	136077	101480	121803	122672	124305	113100	148938	127747
Q3TB82	14337.2	23120.8	27271	28750.7	30464	18193.8	18756.1	16783.7	33473.3	20122.6	29368.4	24758.5	11936.7	38567.3	45334.4	32186.8	28450.3	26203.2	NA	19533.8	NA	27698.8
Q3TBW2	26507.1	30031.9	41361	30040.8	41543.9	42814.9	26192.1	35267.2	30577.4	26736.3	31603.3	31397.3	26314.1	46100.1	40184.8	43174.4	44235.4	35447	16213.3	40809.6	33718.5	28096.2
Q3TC72	90791.6	99383.4	113371	112744	119867	91903.5	92387.6	102928	123701	81237.8	139048	133441	82731.5	118173	145398	93532.3	88639.9	109858	86308.1	46522.7	47315.8	108326
Q3TC93	59831	62020.8	122306	46023.8	50438.9	48032.9	70792.2	134280	119354	98435.2	88728.7	81140	112210	67321.2	85684	70953.2	84889.5	76794.2	33634.3	85165.4	124556	68768.6
Q3TCH7	16788.5	23643.8	37063.8	32131.9	33839.3	26328.4	22652.5	27809	35888.2	26707	19081.1	25765.1	23507.7	26659.7	32587.6	18863.9	29705.8	37604.1	16419.8	22153.3	19403.5	30599
Q3TCJ1	70177.1	86058.4	87865.7	89105.4	74542.7	54351.7	79641.1	59823.4	110543	75755.3	78201.1	64742.8	38289.3	82636.1	66204.2	86295.5	75892.5	80980.1	63242.3	49512.8	46380.3	68974.8
Q3TCN2	36534.3	35692.3	27501.3	43048.2	33509.7	47255.8	55626.3	49259.6	44739.6	62057.8	51935.4	62362.4	63139.6	34112.8	41536.4	43515.3	36471.4	37771.8	55879.1	50063.1	88449	25292.3
Q3TDD9	21262.1	18161.1	19215.4	18877.1	17661.5	20870	20532.4	23787.2	41156.4	24600.1	16140.2	19519.1	22442.6	18521.1	15546.7	19054.5	20231.5	15551.5	21466.2	21014.1	36167.8	16114.4
Q3TDN2	50424.3	41576.6	48419.8	61833.3	51211.3	66005.2	45403	56772.2	76758.9	59620.6	40857.4	56402	43499.7	70604.9	50628.7	33763.8	56721.3	49961.8	50425.5	67808.3	71449.2	57249.5
Q3TDQ1	13290.2	15994.7	40212.5	39056.4	45942.4	37673.8	15761.3	32881.7	38439.7	26564.8	10722.8	30148.7	22872	41947.1	43638.9	14620	50773.3	38795.1	5281.13	20939.2	8109.39	38413.5
Q3TEA8	48895	43745.6	42500.4	38184.8	37313.9	49505.2	54774.6	43728.9	27981.5	61519.5	48871.1	58749.5	73560.9	61616	47372	66744.1	31367.4	38106.9	53082.9	54040.6	74643.1	37112.3
Q3TGF2	55348.1	22617.3	21184.6	27318.4	23136	34237.4	59598.7	51902.6	28080.1	28088.1	43699.2	41481.4	45565.4	20934.1	30476.1	25091.6	27215.8	25120.1	36765.1	29581.1	52724.8	26371.1
Q3TGW2	22550.5	25583.7	20929.9	21631.4	13261.3	23159	23043.7	22685.1	23273.1	24588.2	24758.6	21215	18478.5	16714.2	15821.9	17952.6	30473.6	26985.3	33967.3	43849.6	42677.5	25642.1
Q3TH73	11829.1	10372.8	7533.13	9100.64	13363.6	31678.4	18674.2	22245	7437.91	NA	NA	NA	15759.2	1829.92	3634.45	NA	7216.55	7165.07	25382.7	29466.6	31346.8	7267.08
Q3THE2	67028.9	71394.8	40205.2	53057.7	39770.2	40095.5	69177.6	51967	73745.8	133397	84427.1	70129.2	78079.1	54821.6	22688.4	84823.8	67634.7	57948.2	122217	146340	232824	68139.3
Q3THF9	16251.8	NA	NA	28784.4	32256.8	NA	16913	20338	32675.3	7344.71	NA	34826.4	NA	68788.4	61793.8	46413.5	NA	23552.2	NA	NA	NA	NA
Q3THG9	53276.8	54325.9	45953.6	39048.7	48619.7	51757.2	57266	61912	40262.1	63297.4	63552.2	53864.3	64404.3	49881.3	38369.5	33842.3	49362.5	56867.8	95001.6	111614	152337	54745.6
Q3THK3	26284.3	19335.3	17201.3	14718.5	10717.5	13417.1	28226.5	17787.5	53333.3	13354	21645.6	16220.5	18316.4	12473.8	13482.1	23982.2	18289.6	11481.4	29417.2	33884.5	38639.9	22808.2
Q3THK7	49314.2	48046.8	56929	56239.3	48396.5	33317.9	49888.1	48797.7	36759.3	38914	66823.8	49534.5	40750	66137.5	67807.5	65048.6	41084.1	47201.5	56438	42233.1	26058.7	44280.4
Q3THS6	53454.3	63783.4	78853.7	84591.2	75509.3	53564.5	62562.3	66509.4	105717	56858.2	68446	88089.8	48614.1	69053.9	79929.3	57255.2	83211.4	91011.2	80575.7	58104.1	61908.2	77087.3
Q3TIU4	33751.3	37571.9	58373.1	53087.9	55843.9	39385.2	29197.8	33807.8	46189.3	31710.1	35482.6	36448.4	15052.7	68015.4	36733.7	57060.5	54744.2	41683.1	18256.9	56111.2	32257.4	48520.5
Q3TIV5	55198.4	39813.6	38831.9	35451.2	27533.6	44299.1	25208.9	45137	42227.7	57924.4	29878.2	32507.1	48875.9	23767.1	34272.7	31531	42659.9	44617	50845.8	62417.3	92734.8	41361
Q3TIX9	26105	30948.8	47829.9	48148.7	45811.6	31040.5	25800.1	40797.7	39400.5	26003.8	34533.3	30763.5	12787.4	53899.7	53662.1	49967.9	41722.6	28983.2	24530	24896.6	69939.8	34077.8
Q3TJ91	6262.4	9962.79	14325.3	19534.3	18074	12988.2	10162.3	5311.79	12057.4	4111	8320.39	7332.83	4144.52	12227.3	17371.3	9999.97	15363.5	16991.1	1450.22	9084.14	3952.88	17093.3
Q3TJD7	38048.7	41717.6	52355.6	34981.4	30024.4	56973.8	45416.6	46381.9	34432.5	61278.6	27709.9	58455.7	67924.7	43852.3	40513	46656.6	48743.9	27693.2	42860.2	53787.3	54271.4	30430.4
Q3TJZ6	40475.9	41498.5	64145.4	60044.6	70419	45787.9	30158.2	38412.1	51992.3	42297.4	61879.5	39772.5	47831.7	62020.6	33197.8	45326.4	38016.3	52015.7	45087.4	47831.7	33226.1	72869.3
Q3TL44	12604.9	25540.2	66968	31533.2	37749.1	22368.6	29935.5	34219	39356.2	44462.3	33935.1	39654.2	23881.3	60412.3	20992.7	37633.6	34980.6	29731.1	14011.2	18040.8	26185.5	43861.5
Q3TLD5	20729.2	11754.4	5279.14	13103.6	4100.94	5534.45	7870.87	6409.64	21579.8	13784.9	17807.1	6714.38	5808.02	12963.1	10478.1	13728.5	5121.54	5760.64	12988.6	16568.9	16561.2	7665.39
Q3TLH4	19408.8	22507.8	27303.9	25158.5	24835.9	21359.3	23773.3	19459.3	31738.9	25737	31968.7	18352.3	22139.9	21410.3	24714.4	20414.3	17760.5	16042.6	20353.7	28591	34601.5	19713.6
Q3TLP5	128000	112981	95406.8	103418	111891	113043	111387	116905	74087.4	95140.2	80426.1	155530	136656	146081	136481	151525	88276.1	124148	201016	99039.7	111154	111411
Q3TMH2	73722.4	73033.4	72469.7	60334	62237.6	64171.3	79337.5	76407.6	64554	83068.2	72766.4	69391.9	77259.6	65307.9	69733.7	58942.8	56888.3	56525.7	72579.8	49848.4	64702.3	56066.4
Q3TNA1	74455.1	55403.8	67847	53246.5	58506.1	58495.2	63005.2	75274.6	69834.5	46765.1	62401.5	69284	54989	149742	108802	79207.6	68023.8	66457.9	41137	45778.4	74938.9	50565.9
Q3TPX4	28059.6	35162.8	30605.7	39258	35319.5	26698.4	34975.9	34117.9	33125.6	41475.9	31532.9	40096.8	22685.1	33609.6	19963.2	27871	23855.9	35217.5	32406.5	29673.2	35607.9	31467.8
Q3TQB2	6211.71	8983.45	17736.5	20317.8	15992.1	11553.7	10672.1	11865.9	NA	10399.7	NA	14931.9	9567.54	23653.5	24378	26857.4	21610.6	19241.8	6078.4	9781.57	6332.33	6886.78
Q3TQI7	45293.8	35075.9	27829.8	NA	23210.7	28355.6	NA	39619	34951	40251.1	NA	36312.6	NA	NA	36283.2	NA	28396.9	13686.4	50045.8	80787.4	91883.2	25298.7
Q3TRM4	17788.6	12640.4	15096.1	17472.1	16463.6	12115.7	16303.9	11930.5	15579.9	11456.2	11665.3	11674.6	9623.74	13624.4	16845.6	12360.9	12736.9	15210.9	10726.4	9200.99	14798.2	15154.9
Q3TRM8	33225.4	27902.7	23043.3	42482.4	72410.1	18371.7	35055	30626.2	16362.1	44278.5	57646.8	23196.4	54189.3	28291.2	32010.1	20737.4	33389	80686.4	20835.1	11155.1	28644.9	30487.2
Q3TSG4	7925.36	17684.3	22535.9	22004.6	17601	27115.8	17222.1	25897.2	17279	NA	27280	28283.1	NA	19382.2	31616	29381	27762.5	24309.7	10409.9	24091.5	16045	21331
Q3TVI8	3245.56	6911.52	3478.18	4349.96	2977.48	4406.96	7081.36	3061.18	3674.13	2714.79	3946.55	1445.95	3658.33	1506.85	1062.47	1575.01	5018.91	5949.67	5697.23	6931.68	5447.29	4221.7
Q3TW96	14985.4	15122.9	15022.4	21653.4	17054.5	12778.5	25530.5	15449.9	17902.7	23439.6	15359.2	16872.8	28517.1	18297	16293.5	16075.1	19962.3	19697.6	16061.5	18370.1	25212.8	19552.2
Q3TWW8	148197	80130.1	91557.9	101463	64198	90371	66631.2	64601.6	58397.2	75710.4	72324.3	74402.4	79972.3	73471.2	74615.8	89359	64420	62242.6	64846.7	124501	81828.6	56644.4
Q3TXS7	89364.3	90221.5	107472	103138	123332	93167.4	101386	99883.8	90186.9	99678	77857.2	101109	95437.1	112014	105266	74222.3	124534	114840	101880	112385	100099	130973
Q3TYD4	13722.4	9566.48	10930.8	7370.08	6399.49	11249.9	17934.5	10403.7	15021	13297.3	31973.1	30130.2	24237.6	11743.1	16761.4	47170.3	16158.4	13427.1	26760.2	28280.7	29432.8	18250.5
Q3TYS2	4540.68	9739	15381.4	26944.8	14445.5	15365.4	9752.13	10654.8	11565.1	8517.32	4601.33	5930.31	8519.21	6886.19	10086.1	5354.58	20670.9	18716.2	2788.83	11464.2	6431.12	18267.7
Q3TYX3	46558.3	35102.9	29941.8	37796.4	34124.2	30292	39337.9	34427.4	30851.6	61114.1	41798.7	35916.5	50165.5	41792.1	22916.9	32769.8	34779.3	32948.8	63049.2	63272.8	110804	35803.3
Q3TZZ7	18655.9	23175.2	31034	26002.3	33829.1	31434.2	21341.7	27695.5	36924.4	19847.9	30537.7	30034.8	46942.1	47730.5	60938.4	39875.6	33677.6	32241	20354.5	26900.7	23205.6	27846.1
Q3U0B3	80095.8	74920.5	65876.5	43507.4	52979.4	80900.7	64570.5	74481.5	100581	86450.2	75075.1	65944.7	150161	84514.6	86399.9	72962.7	60650.8	53427.7	89579.7	67259.4	55603	45635
Q3U0S6	89339.8	12801.7	32283.4	91358.7	13207	17531	56666.1	57200.5	78785.6	19548.1	53206.1	52964	116758	32533.1	65225	56603.8	28412.6	35628.1	18145.1	67511.7	63810.9	17680.9
Q3U0V1	117889	96050.3	91788.2	56567.8	61395.6	69918.2	102044	122435	219031	90581.3	117445	76120.5	111647	87436.6	90440.3	133545	68077.8	55964.4	102805	93930.5	176529	69655
Q3U0V2	16153.3	15017.6	13955.1	12443.1	10084	16877	17508.6	16009.7	21803.8	26967.9	15572.5	17619.1	17419.6	9405.74	9870.39	12683.9	13741.2	12155.8	27984.3	23029.8	33283.1	17456
Q3U182	11352.7	6605.25	NA	NA	NA	12882.2	10778	NA	NA	NA	NA	19153	18256.3	NA	NA	14333	NA	NA	21666.3	12707	37068.1	NA
Q3U186	35127.6	25866.7	29139.9	26822.7	23026	26230.2	25392.2	28861.9	28021	26963.5	29917	30825.8	21511.4	32198.3	27570.7	30421.4	25188.5	25370.1	28087.8	25021.3	26269.4	24685
Q3U1F9	1920.84	13762.8	9846.14	8765.01	8106.73	13045.5	12918.3	10781.7	13162.6	10777.9	17827.6	10428.4	10958.7	10939.6	1790.77	11849.4	8620.44	10543.9	10211.7	17357.5	21585.8	8603.75
Q3U1J4	62510.9	54356.5	74888.3	78661.7	61543.5	38178.6	62054.9	37993.7	56183.3	36359.8	58940.6	31540.5	76606.9	74790.4	59667.3	62203.9	49197.1	53302.4	34080.7	40157.6	33392.4	42736
Q3U1V6	52811.4	29963.7	32437.5	34663.3	31733.7	36415.7	33690.8	28108.1	NA	40421.4	87897.9	40434.8	3649.38	58823.9	38594.1	85225	36555.6	41815.5	23091.6	20723	20230.7	28562.3
Q3U1Z5	25228.1	23181.7	15495.9	29558.1	15103.2	14497.1	18457.2	18933.5	22897.5	21400.6	16708.3	18899.6	21865.1	18249.2	16777	12848.3	25446.9	15232.9	1764.21	18344.2	32615.7	16915.7
Q3U276	4573.33	10455	13666.1	14331.6	15427.9	NA	14298.5	3814.38	NA	4371.93	1575.08	5576.74	2622.13	NA	11291.8	4290.85	6070.14	14426.1	3895.51	7557.78	5314.61	12532.1
Q3U2A8	46011.1	48325.8	34025.9	43605	42874	44624.5	45115.1	40604.3	41331	46068.8	48067.9	35449.5	35706.3	31157.7	36958.3	38311.4	39351.4	36280.6	48487.5	30415.6	43994	41316.9
Q3U2C5	24619.2	21715.3	11313.4	10384.9	12423.9	10544.7	17303.9	9454.36	12842.5	10192.2	17161.6	6852.45	13997.8	9609.53	9565.86	16506.6	11309	13836.1	14038.4	29896.2	25413.2	9361.82
Q3U2P1	59743.7	81450.4	96066.4	107954	132763	103046	66809.6	99190.8	109661	85246.7	66292.5	92325.1	70040.2	96598.5	113505	88752.6	128732	130066	38125.4	97541.7	68598.8	111885
Q3U308	6526.6	13624	14484.3	15563.8	10501.4	8256.83	12265	7197.08	NA	4735.56	12599.6	7961.58	7573.15	16879	10013.9	16015	8123.38	14942	4449.74	8911.68	4462.97	14847.2
Q3U319	11212.1	12919.3	14239	11990.6	15024.6	16516.3	20944.6	25079.5	54776.1	11979.3	13509.2	11181.4	7992.61	21207.4	10013.9	18001.9	9400.31	10490	10898.1	10558.3	17543.8	9489.87
Q3U3R4	19181.1	14588.1	29259.7	30692.1	26676.6	16580.8	18330.9	23841.4	25327.2	11913.3	9217.18	13233.1	8663.82	13988.6	17179.4	8910.86	23703.2	23231.6	10469.9	9758.42	18298.8	22745.3
Q3U487	46608.3	45092.2	35177.1	53530	46655.4	40266.9	45224.9	52642	51745.1	47702.9	41092.5	41687.5	26794.2	25418.4	27963.5	25105.9	47842.1	45073.8	41574.4	27438.6	29389.3	44370
Q3U4I7	48058.8	9657.4	12718.2	14441.2	9171.58	26296.4	28230.2	7187.51	120072	26057.5	15530.9	57007.3	16937.3	20437.7	35080.1	50620.2	15102.7	22856	17368.8	10294.9	15806.6	6003.36
Q3U5Q7	30956.2	33185.3	30345.2	38864.6	24720.3	34915.3	43492.3	38147.7	44454.2	43195.8	21212.7	23773.8	23836.2	34907.6	26992.9	46657.5	22095.6	18184.9	19252.5	11047.3	41656.9	26416.3
Q3U7R1	28647.1	26648.2	49695.8	35225.9	43705.1	41827.2	31494.1	37781.9	42206.7	43624.6	29873	39952.1	27100.3	43436.1	40782.9	36481.9	39654.4	40030.8	27114.8	24143.6	22634.8	44448.5
Q3U7U3	47804.6	50308.7	48887.3	42446.1	39905.6	64373.2	46320.7	67387.8	58724.5	66969.2	32593.3	42205.4	53999.8	43445.6	32664	36962.2	40478.2	38466.5	34328.2	70005.4	70961.3	27861.5
Q3U898	32777.7	22541.2	26018.8	15593.2	26229.4	25403.1	21562.6	22588.9	38478.6	33268.3	50231.3	39307.6	41347.8	34430	22164.6	33678.5	25432	26888.2	38523.2	47032.9	62038.3	18410.7
Q3U9G9	32978.9	27287.6	61723.6	59509.6	53336.1	69473.2	31483.3	49781.6	39961.6	37741.7	37957.8	41194.1	37251.7	55736.8	56765.5	38153.3	82231.8	55163.1	44274.3	34915.1	60131.9	52133.4
Q3U9N9	23544.5	27134.1	38405	47370.8	46450.9	44879.7	15599.4	41754.9	51268.3	32791.2	19643.9	28514.9	40179.3	83697.1	60400	32713.6	39486.7	31842.4	NA	23941.3	29521.5	24731.3
Q3UA37	10004.6	18397.9	12910.6	21933	18460.6	6748.31	20612.1	5425.7	9652.74	4457.7	7342.79	6269.52	NA	8356.32	16525.6	15039.9	9684.82	17366.2	11310.9	8150.02	6913.52	14066.1
Q3UBG2	38048.6	30520.8	19474.4	25758	23064.4	38775.5	30838.1	33966.3	25748	30606.7	29647.8	29167.6	40708.6	57051	23075.2	24794.4	32398.3	22291	45627.8	36222.9	57215.9	37532.8
Q3UBX0	64799.1	48061.9	47624.1	31046.6	44961.4	102318	62438.3	65969.9	65567.8	72636.9	59870	71808.6	62736	37678.8	28630.5	22706.6	53952.3	30727.2	41502.2	64451	150924	29862.2
Q3UBZ5	131762	16650	13931.6	16395.1	16991.4	28515.8	25006.6	107911	22670.7	39458.8	109820	98241.2	113668	145804	68799	32166.5	96527.9	38981	37250.6	28985.7	43579.3	83887.3
Q3UCV8	20410.5	20600	19410.2	21796.8	27132.5	19597	23931.9	12208.5	25454.9	16192.5	10218.1	16708.8	14326.5	13326	15881.9	13502.2	20491.3	20113.3	16695.2	16010.4	15490.9	23830.8
Q3UD01	116159	113870	111841	98591.1	104243	99517.3	103141	109095	127979	103299	135768	107156	97229	135078	108660	134669	102064	106403	112396	116800	123002	96691.5
Q3UDE2	26461.2	22845.8	23146.7	24481.2	21576.3	24375.7	25268.2	21677.6	23967.1	27225.9	18942.1	23411.4	25333.9	22223.2	19306.2	13302.1	24565.9	22154.8	41184.7	28032.3	29909	23958.8
Q3UDK1	42969	40591.5	25320.4	34780.4	27275.2	39316.7	27664.3	28188.3	28208.7	38072.3	30208.7	23663.3	20763.1	20358.4	19672.7	16704	27699.6	26638.6	35765.5	45998.3	54364.1	27045.2
Q3UDR8	28559.3	23608.4	22811	23821	37687.4	26878.6	39663.9	92049.3	23367.8	16282.1	28162.3	39587.6	36151.4	28254.8	25141.9	18309.4	68963.5	34998.4	12868.8	34419	43393.9	38812.8
Q3UE37	42718.5	42867.7	51314.3	48025.6	46278.2	29991.8	44722	31206	41093.9	35658.7	47765.8	31044.5	56958.5	53608.4	49461.5	59838.4	30392.7	42818.2	50245	37408.2	42247.7	49405.5
Q3UEB3	32224.7	40337.8	72215.7	57382.1	59786.5	31107	37925.8	56593.1	58800.9	59899.6	49656.8	47490.5	42626.6	89422.5	65793.6	71439.3	47863.7	51107.4	21818.2	49605.3	26813.6	50566.2
Q3UEG6	134452	159483	145398	137966	147020	120829	91806.9	105825	100556	142575	126156	168867	145408	202535	229864	173242	189243	135381	99236.3	100639	107666	116691
Q3UEI1	22844.3	22032.4	15839.3	10614.8	10303.3	14133.6	20609.1	15554.6	14417.5	13871.4	31899.2	18806.1	15553.5	36311.5	22052.9	29622.5	14758.6	18794.9	30353	26382.4	39514.8	13481.9
Q3UFF7	36868.6	47822.2	47867.8	58643	66458.2	46987.3	40311.6	25810.3	79431.6	30312.2	37776.1	45415.1	27998.9	70892.8	39583	37666.5	38528.9	39637	44247	43276	35234.8	49290.2
Q3UFK8	38755.2	30007.1	32026	35091.2	37006.2	35481.4	46396.1	29588.1	42281.8	39217.2	36330	33630.4	22562.6	22306.4	21839.6	20317.6	33460	25768.9	51796.8	39595.9	57188.1	31239.3
Q3UFS4	1347.83	2543.79	1288.85	1528.08	1060.03	1158.97	2457.78	1195.12	NA	1931.25	2310.36	817.201	1246.78	NA	NA	1798.66	1638.23	1721.06	1677.72	3543.13	1660.4	1277.1
Q3UFY7	3112.86	NA	NA	NA	NA	NA	NA	NA	NA	NA	NA	332.724	NA	NA	NA	NA	NA	NA	NA	2793	4073.93	NA
Q3UFY8	73470.1	30674	23700.8	23254.7	24250.7	24480.5	35830.4	25197.8	39239.4	46955.7	51102.5	26645	25116.2	53899.6	33534	25728.7	55650.6	42575.9	35600.3	35773.9	33088	48060.7
Q3UGC7	565066	458692	335716	195430	357726	562122	422130	481813	468306	601621	559610	404410	399814	310973	319796	346284	391151	347929	563696	723758	1.24581e+06	315426
Q3UGR5	114902	99965.5	104247	99655.9	115586	77929.9	117431	85788	76472.3	85391.1	95607.5	95403.6	99006.9	98426.5	82360.8	75378	80887.2	87907	101705	61488.8	87661.4	98240.2
Q3UGS4	29324.4	52180.8	11904.9	37996.6	29933.1	11627.8	19056.6	9962.75	36816.8	23482.7	22462.8	13845.1	16663.9	24332.1	15226.7	42909.1	30369	18025.1	22638	38925.4	59242.9	23641.3
Q3UH60	25603.3	27030.5	NA	NA	18286.6	NA	19713.5	NA	13986.4	10277.2	NA	10791.5	NA	NA	22132.4	NA	13549.4	15767.3	15766.5	NA	21955.9	NA
Q3UH66	352706	366446	356864	354699	378726	435593	428367	536296	469432	600856	607904	632378	519152	624644	597844	636852	561303	426034	696264	502193	571128	436688
Q3UHD6	39543	43149.2	64091.8	72891.2	73368.2	NA	40135.3	46874.6	NA	49935.2	41378.1	49752.5	29184.9	NA	57738.8	48209.1	70107.2	53611.4	NA	50682	30555.7	67685.8
Q3UHJ0	3157.07	11105.2	6767.43	6367.78	2449.44	6534.23	12728.4	4958.09	NA	4678.62	9873.32	5226.24	3144.17	5162.46	4712.44	7818.33	7096.57	7944.61	5955.93	11885	10069.9	5125.21
Q3UHN9	8333.64	7951.23	6115.52	12342	7917.87	12965	7360.24	7974.57	10915.1	12617.3	9246.17	7254.88	10227	4562.85	8244.58	9330.35	11793.8	13362.1	14431.3	12400.6	7118.9	8153.47
Q3UHQ6	20833.3	9534.22	8542.38	6524.4	13937.9	9791.35	10803.7	21637.2	24939	12316.3	22451.8	28957.7	10880.7	8892.21	6931.25	40818.9	12041.8	11840.2	19337.3	16513	22269.9	12706.5
Q3UHX0	25989.7	NA	NA	12184.6	8095.38	NA	61186.5	16795.9	16166.1	NA	NA	58386.1	14075.7	NA	NA	NA	NA	7010.58	12480.1	24118.2	43457.9	NA
Q3UHX2	238292	167151	116648	111832	134381	115238	109202	120001	198832	136192	147574	158474	162005	150744	121244	114143	132623	128584	160811	196621	266574	97560.5
Q3UI43	45744.6	26844.3	28292.8	26147	18975	31926.6	31766.8	35750.6	153035	57775.2	31812.2	45116.6	27914.8	112673	20576.7	34590.7	27956.3	21232	42375.7	52873.5	58330.3	22783.9
Q3UIA2	63268.6	47638.3	38022.4	45329	35941.8	37826.1	85330	42070	42104.6	54892.5	37773.3	33684.6	53085	31836.6	33375.7	39340.1	34594.3	50930.4	49970.7	52804.1	74012.2	45605.9
Q3UIL6	10811.3	19954.2	9520.45	16533.5	13709.9	9606.24	19806.3	10770	9380.13	10604.8	17721.7	7772.94	36516.7	11553.2	9318.23	9439.79	14898.4	11559	11459	12145.2	12392	12849.5
Q3UIR3	40208.7	45757.3	36838.6	40070.7	32071.7	33729.9	38704	31363.9	33577.5	26644.5	25471.8	28016.3	27519.2	21631.5	27581.2	25340.7	33252.2	31467.8	35069.6	31023.5	29702.9	39892.4
Q3UIU2	200296	239227	190000	187486	155833	100088	109365	187012	241186	78721.4	281865	190935	91576.5	363577	251534	294756	197111	203225	228798	295539	323112	364059
Q3UJB9	46875.9	41230.8	33692.9	39890.6	30799.5	40747.9	39124.9	45275.9	40489.1	45093.4	38133.4	34982.1	37574.2	29790.2	32088.5	40730.9	37837.7	31698.3	51418.8	49158.4	69325.5	36512
Q3UJD6	14186.9	10597.7	12802.6	13561.6	15208.3	13459.5	10933.8	8237.87	17838.6	8941.05	9723.49	6708.82	9211.94	8660.03	9362.35	7971.62	11714.3	13166.2	10351.7	9369.8	13272.7	14237.5
Q3UJU9	100252	72792.4	98818.8	56810.4	72164.3	93436.3	66998	88942.8	99600.2	69105	99285.2	85469.1	94570.8	76889.5	65337.5	111849	73094.4	40787.8	69589.5	75696.8	117355	48273.6
Q3UKC1	5167.69	6426.09	5118.71	4898.1	5871.05	4615.71	6077.24	2359.25	1633.18	3625.41	9713.41	3139.88	NA	3314.5	NA	NA	2103.17	NA	3202.27	5988.93	NA	4223.21
Q3UKJ7	41595.1	39375.6	57156.6	64346.3	66786.2	43345.1	39873.4	43448.2	39073.1	49600.3	45317.8	55584.6	37471.3	75552.1	65158.8	50481.8	36220.7	40238	206474	43377.5	40190.7	47474.8
Q3ULD5	62374.8	41407.2	72792.6	60077.7	54894.8	53628.4	44382.9	50517.4	87820.6	51850.1	50662	67876.3	67021.1	77739.8	89584.1	75238.7	61729.4	72601.3	37966.4	72056.2	49527.3	60236
Q3ULF4	48419.9	48649.9	41103.5	49524.8	47154.9	54490.9	45323.5	52165.9	50521.2	37223.9	40642.8	45397.5	48351.8	54810.3	52253.3	52072.6	40055.6	54348.7	40783.5	35273.2	41870.3	56954.3
Q3ULJ0	101364	75335.4	92963	68111.3	72843.9	76627.7	90144.6	92016.6	87919.6	100740	123230	92701.8	94140.4	75818.4	129358	70166.9	75610.9	94425.8	136082	67917.8	66814.2	95643.2
Q3UM18	5913.39	6002.77	3898.2	6136.73	4948.02	8266.31	7531.15	5253.05	41403.1	9512.85	9221.44	2950.02	8904.07	6173.23	4977.64	10639.9	4325.3	4457.19	10597.6	8518.25	7712.86	10448.1
Q3UM29	18848.8	18039.7	16491.2	18842.9	17147.9	12051	15790.2	8123.53	15312.3	14384.6	14441	20226.5	11465.7	19710.9	19993.3	19309.4	16278.8	20193.8	15965	19403.8	11337.9	20288.6
Q3UM45	89606.6	65138.9	52687.5	63405.4	54642.8	84132.5	69957.8	77222.3	70205.3	99754.3	72292.7	74997.9	102748	70885.5	61498.2	62622.2	74692.1	62978.2	133661	109957	190863	51724.4
Q3UMB9	35192.1	39732.7	56435.1	62292.2	65022.3	38746.5	32083.2	53186.6	54193.7	67420.5	38582.7	48608.7	37422	65256.6	61720.1	59757.9	55523.3	47668.4	12065.9	46663.7	47203.2	64960.7
Q3UMC0	8615.92	13384.9	12040.5	9981.18	10810.7	11908.3	11015.7	7327.8	22063.3	7402.15	9533.16	12868.5	9330.96	9674.47	8345.54	15526	12575.7	10374.5	10432.4	11098.6	10895.4	9885.64
Q3UMF0	42039.2	39366	39457.1	39153	39904.4	44762.3	31605.7	38742.3	65528.2	35517.2	47217.2	41003.5	47540	59261.2	55392.9	59834.8	44171.9	35383.6	41011.6	64284.2	53709.5	40166.4
Q3UMR5	9977.48	21048.5	23323.1	18585	17634.6	17001.6	25798.9	14852.2	20709.7	18653	8914.92	15139.2	22137.6	23504.5	28729	20067	26052.9	17013.3	7324.3	17152.2	22510.4	22101.4
Q3UMT1	30654.9	23248.2	21111.1	22604.1	16739.9	20296	24275.6	27754.5	39068.4	31156.4	20215.2	27374.1	31951.2	20933	17766.7	23325.8	21535.2	15704.4	23325.3	32316.6	43943.7	19782.8
Q3UMU9	25536.7	13933.7	13551	18033.5	17215.8	32747.4	26730.2	27168.4	126959	49950.7	19069.6	19164.8	10993.8	56001.1	38842.8	23322.7	14446.4	8745.25	22668.5	35393.9	74107.7	18892.9
Q3UMY5	39547.9	19466.9	21375.1	22716.5	27666.6	33614.2	19796.7	20483.3	28865.1	28672.2	29682.2	35688.2	24536.8	21206.6	17674.3	19096.5	19654.8	21347.1	35307.9	27441.6	70656.6	14984.6
Q3UN02	73557.4	90340.7	115680	142560	140514	120196	99045.9	106624	197529	101706	90213.4	107958	96539.5	223911	154695	106507	179711	156534	21347.2	104766	130568	150306
Q3UND0	7211.9	7383.74	6621.4	9350.38	7043.02	5306.25	8772.25	7568.68	5466.3	10643.9	7175.49	7127.06	13671.2	8258.09	7790.99	9594.88	9876.85	6416.81	10675.5	11084.9	14147.9	6440.27
Q3UNX5	62723.4	56464.9	44511.8	38765.8	48243.5	59449.3	66314.7	64499.2	57720.7	55991.2	69305.9	98532.3	100295	59594.2	101823	68851.1	64202	54434.2	70114.2	66806.6	64604.1	48047.2
Q3UNZ8	38252.7	46447.2	81467.3	76064.8	81773.1	57359.1	34348.3	63991.8	85731.4	65368.9	30088.6	44089.3	38615	73021.3	90015.7	47386.4	68277.2	54976.5	10631.5	44161.8	28917.5	60138.3
Q3UP75	42203	26295.2	37282.7	39978.1	51651.5	39422.4	18374	57441.5	67647.4	47656.9	12889.4	28053.3	23247.6	16973.9	29265.5	34325.9	43526.9	37740.3	7729.58	32282.8	36127.8	41183.6
Q3UPF5	85590.9	67259.4	62054.8	53530	61719.6	44280.2	45404.3	47645.4	85623.5	52330.8	46582.8	53907.3	66590.9	47403.1	38502.2	43372.4	56216.2	45507.7	84192.4	47501.3	77374.8	57861.3
Q3UPH1	51938.9	45491.9	56017.4	41551.2	46398.7	47749.1	48831.6	52027.8	37752.8	59835	41640	40957.6	52166.6	37895.4	35431.6	39770.9	36660.3	38321.8	73234	63381	86175.1	32725.5
Q3UPL0	97832.3	95991.7	97055.2	116432	98593.8	96226.9	93302.8	95823.4	91793.7	87456.2	87258.5	84522.8	63990	107543	93480.1	83520	99983.7	93236.4	102334	75337.8	86528.2	116407
Q3UQ44	94055.2	80343.9	103585	104080	116406	108259	115829	151711	106159	134290	117400	138825	121945	159358	117945	136180	111036	113486	121342	108704	106146	112774
Q3UQ84	51330.6	43163.6	51322.6	51195.9	53735.3	49539.2	41240.3	38957.6	18168.1	37464.3	49663.4	40847.9	38626.7	72838.3	48716.2	54553.6	43245.2	44163	46078.8	44248.8	31920.4	57378.5
Q3UQN2	34029.1	26109.5	20267.4	21656.5	19767.5	28322.8	33456.1	38547.2	23188.2	33050.5	34598.4	33752.6	47674.9	19352	19561.6	21707.6	25725.7	25499.8	37633.2	54792.7	81172.6	21643.2
Q3URD3	62241.2	50622.4	58289.6	42274.5	27032.7	55022.4	95149.9	67258.5	147463	75225	69678.7	76246.1	54059.2	92416.5	64489.5	100418	46685.4	41776.1	54191.9	57865.4	97832.3	51231
Q3URE1	68961.5	55571.7	60025.3	69678	67452.6	42357.2	44856.3	41102.3	44607.7	51633	36137.6	42794.3	31037.7	44271	45313.1	31525.2	53509.2	47762.9	42315.1	41306.5	41771.3	65221.1
Q3URS9	61818.1	57806	36687.8	51793.2	40965.8	32697.8	52539.9	41073.2	28043.8	36770.5	48426	21104.5	30296.7	19246.7	29502.8	44734.3	27686.8	38776.5	67372.2	64834.6	62808.1	47709.1
Q3USH5	5257.53	4999.69	4218.7	4844.69	2514.11	4038.15	8011.84	8906.5	7183.08	NA	7324.53	7041.08	5177.34	NA	7031.31	7550.98	5755.91	3894.44	10441.3	8868.62	NA	9598.08
Q3USJ8	16577.8	22630.8	14846.7	32885.1	18383.5	21246.6	39820.6	20186.6	NA	21064.2	41079.2	26383.1	16366	13813.7	18364.6	29620.6	36113	9952.74	23868.3	19205.8	32828.2	36145.8
Q3UTJ2	103992	70696.7	63547.6	94715.4	75515.3	97311.6	60289.1	61809.6	81193.3	82580.5	90000.4	66285.6	60594.2	73506.9	47577.2	85124.5	61338.1	50678.6	58709.5	70024.5	76238.5	63123.6
Q3UUG6	17607	12268.4	24669.3	21337.9	12390.2	17255.4	11817.7	17841.8	19404.7	18818.8	21890.5	24275.2	15435.7	17913.2	19015.6	23287.3	20515.9	23172.3	14594.9	23449.8	17455	22226.6
Q3UUI3	50298.8	74597.4	90251.6	114579	101483	72347.4	58484.7	79740.2	96968.5	53934.5	78930.3	67767.2	114614	148965	151299	134052	90680.7	101798	35404.8	86900.9	64329.7	85294.3
Q3UVG3	4726.01	6865	10100.7	9368.39	9965.46	8791.67	5716.68	6695.04	9703.18	5060.15	3222.64	7038.03	2129.22	12577.2	10108.2	9730.03	9186.26	9881.97	NA	9481.92	NA	10419.7
Q3UVK0	47574	51729.9	119863	112622	116231	103646	50569.1	89888.1	98921.1	91690.9	58903.9	76548.3	44631.3	79424	126507	73778.7	127360	107091	22015.1	62017.1	59132.4	115457
Q3UVL4	31006.9	50251.2	18996.7	30858.3	28281.8	18652.3	27745.2	29079	28315.3	32822.1	35710.9	29289.6	19533.4	22996.9	24374.9	24196.9	30459.6	29256.9	34073.5	25331.4	32813.7	26554.4
Q3UVU3	15152.5	16971.3	22914.4	12939.9	21517.2	7406.23	18345.7	20272.3	24818.6	NA	14285.8	9951.11	NA	12895.4	21107.8	NA	19220.3	14446.5	9669.63	16791.4	9151.69	6046.79
Q3UW53	26185.2	21887.4	22203.3	34998	21169.9	20755.8	36963.5	28947.5	34384	46550	29086.1	29563	37498.8	26377.7	26031.6	24968.3	32355.7	19911.3	19507.7	20338.1	35223.3	19228.6
Q3UYI5	25613.2	25896.6	29078.1	17751	23034.4	24735.3	36665.4	25997.6	24071.7	25864.2	37894.5	24772.9	28300.8	25393.9	32971.8	29366.1	30432.5	26290.9	38967.3	28608.9	42121.5	29234.1
Q3UZ39	38148.6	21745.5	20078.7	14780.5	13029.6	15543.8	21433.6	18851.4	28396.7	20435.6	28895	14630.2	22999.9	20043.5	22901.3	37223.9	12734.5	17975.3	26297.7	36685.7	50718.2	15685.2
Q3UZA1	10469.9	956.267	NA	4507.1	3081.67	2641.95	6071.62	4206.88	14095.6	13662	NA	9129.63	8729.37	NA	NA	1546.83	11528.2	3127.8	4990.66	6223.11	14682.6	8680.2
Q3UZP4	7167.04	13919.9	3892.04	3910.43	7999.06	18117.1	13921.5	15956.9	14868.7	18980.8	18353.1	15363.8	30978.3	2561.15	NA	8630.01	10506.7	16721.8	32367	36735.4	44454.7	11870.8
Q3UZZ6	121854	170107	159142	117029	137996	105291	153706	89191.3	236477	120061	169957	167286	234030	156519	139870	121936	102859	102269	88311.4	143335	140205	120627
Q3V009	6259.19	6181.58	5701.87	4409.27	5509	17499.2	7518.26	10517.3	199464	15792.2	6248.78	14009.8	5412.06	5036.67	4077.94	6150.61	7134.44	4204.46	8197.73	10997	18311.7	5887.32
Q3V0K9	15367.5	6335.98	9849.36	NA	NA	586.592	NA	NA	NA	4113.15	4583.32	NA	10057.6	NA	NA	3829.91	5382.04	5817.43	7855.11	19926.4	19638.8	4754.95
Q3V1L4	22579.3	19019.2	32050.7	21173.5	27566.5	28089.2	47156.8	49951.5	41947.1	39420.8	50424.9	16489.9	33108.5	49915.4	26760.4	14864.9	29332	26104.9	22924.2	26675.3	30743	37218.9
Q3V2Q8	44329.5	51406.1	31530.6	32881.3	37599.2	31968.8	49894.3	43054.4	30257.9	38887.4	50396.8	48963.1	67699	28358.7	31084.2	45789.1	31250.5	25899	31042	15986.4	50054.8	28297.1
Q3V2T4	21297.1	19268.9	17778.2	NA	16951.7	21281.7	23339.4	20460	17209.8	17634.8	NA	NA	NA	NA	14698.2	NA	NA	NA	15379.3	23836.2	25021.9	NA
Q3V384	61606.5	63390.3	74836.5	46446.4	70127.5	62837	63567.8	55017	63999.2	48060.9	69524.6	60422.2	50343.2	89359.6	57658.4	73711.3	64878.5	68089.4	70428.2	56021.8	51370.6	71328.9
Q3V3Q7	12055.1	16482.3	18174.7	20186.5	16276.8	10729.5	19281.9	16414.7	22461.6	12236.5	13432.5	12211.8	14691.3	18330.6	18673.2	14797	15123.2	17304.3	4798.7	9428.23	9825.76	16914
Q3V3R4	46774	42618.8	46897.6	40899.3	41293.9	41436.4	45698.5	48771.1	39706.9	40979.6	43397.9	47095.6	45123.2	62318.2	47535.9	55623.1	38815.2	37569.7	31992.1	37419.6	47971.5	35720.8
Q3V4B5	66773.9	72448.5	55906.8	49497.1	49169.2	35786.6	67888.9	56001.6	62702.3	63918.8	70368.7	61783.9	61805.2	55672.4	40383.1	38955	45515.6	48130.5	82580.6	77795.1	88690.9	51321.8
Q3ZK22	3850.71	5666.51	4816.49	4513.66	1606.3	2860.54	5560.03	3713.17	NA	6782.53	3537.34	3571.7	3751.19	8672.71	4265.93	3330.62	3258.3	3361.62	3709.79	6607.56	5396.88	9306.14
Q4KL35	50367.1	49492.4	29754.3	25318.9	16136.6	63200.6	53189.4	73185.4	29652.2	68549.5	49515.6	26749.9	32765.5	34918.7	52153.7	37829.3	41419.2	22212.1	22733.6	29883.7	53236	55118.7
Q4KML4	251813	196029	186038	207443	145113	279563	291082	290910	198062	427188	255855	278378	380985	100782	153937	237183	265267	243244	504022	607391	855821	297161
Q4KMM3	38015.4	34623.4	37000.4	19029.3	27151	24330.8	33923.3	27862.2	29283.4	23467.1	33567.6	38556.2	26944.9	42706	22014.4	24583.8	18209.1	21443.1	28936.6	37230.4	38366.9	28273.2
Q4LDG0	111942	107797	188911	173097	184675	205704	105686	177202	202124	251802	143099	199130	167923	249805	257418	208332	258072	197978	89851.4	171388	158611	183769
Q4PJX1	64044.3	50196.8	58053.3	53495.6	58669.2	66863.9	36762.1	63449.8	24816.9	63188.3	48384.9	37057.9	34470.9	68028.8	44714.4	42989.6	67610.6	48265.4	61266.1	72911.5	33434.6	58242.9
Q4PZA2	45686.3	35217.1	34513.8	32177.5	29898.1	48522.4	42348	54366.4	41774.4	46079.7	44297.1	36903.5	51972.7	33956.6	37687.7	47617.3	30873.6	27196	58870.8	57028	95477.3	27672.4
Q4VA53	15255.5	14069.6	11804.2	13257.1	12777	15028.8	18205.6	15441.1	13325.1	13977.2	10493.3	13241.8	12029.4	16888.3	11866.8	17005	12862.8	9433.97	7928.62	14177.2	13618.2	14963.1
Q4VAA2	149732	188359	94637.4	96001.1	131673	138965	124511	107754	143743	126024	173557	80465.8	107798	99700.6	107175	112622	113919	92970	155483	191027	238924	94742.5
Q4VBD2	35734.6	35417.2	59791.4	41346.5	33683	22402.2	36715.8	52554	73634.1	48436.4	54054.3	41060.1	20461.2	48909.9	54512.5	29212.2	35943.3	45127.9	25616.5	27433.4	27004.7	27024.5
Q4VBE8	14451	12185.9	20708.2	21287.2	17098.4	14422.2	7441.97	7242.56	27599	11037.1	8401.69	10292.6	9179.63	13409.1	12365.5	21511.2	13983.4	13997.9	NA	7012.79	5316.97	16037.8
Q4VC33	15527.6	16642.7	14927.5	12219.5	14560.9	12205.8	16031.9	10336.1	NA	17870	6850.28	13407.4	8817.44	12226.1	7866.73	14613.3	14393.6	8848.38	14207.8	10066.9	12197.7	12646.9
Q501J6	100460	83999.5	67217.9	59500.3	71978.1	80244.8	116523	83535.4	75928	103124	89977.9	75296.6	97611.5	54148.7	52106.1	77086	68479.2	49755	101769	63435.2	88749.4	81853.8
Q501J7	15988.2	14776	18497.4	25088.6	14866.1	36599.3	15405.3	23474.5	31110.7	21030.9	25371	15858.7	32121.4	17621.3	25191.2	25740.6	20976.4	12918.2	27830.2	28741.7	31463.9	14035.1
Q504N7;Q8BV49	8184.99	2592.96	4362.19	8686.95	2202.98	NA	5699.12	NA	NA	NA	2598.7	NA	NA	NA	NA	NA	NA	NA	NA	NA	7185.62	4946.08
Q505B7	73587.6	25043.2	19266.6	16047	15569.2	18476.3	24942.4	23004.8	52818.6	27473	69183.4	20103.8	19546.7	50703.8	13395	77027.8	11402.3	15651.4	76965.9	39618.4	52917.7	54122.8
Q505D1	7530.23	11409.8	8272.24	11980.8	9136.42	5747.97	12986.4	7470.91	8608.35	5254.83	8858.34	5739.44	4457.31	8404.63	12282.6	9015.16	8388.85	9709.73	9525.63	8705.5	8407.06	14292.5
Q505D7	50009.7	46393.8	77283.3	61065	75140.1	91795.5	45377.9	68604.4	54359.4	53268.3	37603.2	58773.9	47610.5	61931.9	69458	40538.4	71558.6	44102.7	24591.7	47507.7	41438.3	48895.7
Q505F5	83754.7	78010.3	61199.8	61935.2	62063.5	70314.1	87514.4	63653.7	71667.1	82717.1	78592	80042.7	78426.8	84857	66773.2	89256.2	58120.5	58996.4	109214	92693.8	117983	56955.5
Q52KI8	41371.5	41680.5	40736.3	30829.6	44005.6	39078.1	28841	40098.7	42370.1	36806.8	29400.2	21808	25671	37083.4	42964.1	31020	34623	29905.6	32744.9	64571.6	49412	26053.6
Q566J8	10637.8	16305.2	24217.2	21015.1	13656.6	12700.9	19285.3	22730.6	27606.9	28441	33502.9	8144.62	17509	30504.9	14041.1	14825.3	28291	15172	18225.3	27927.8	35716.3	13759.5
Q569Z5	34393.6	61011	62795.5	54714.3	72363	42797.7	47269.7	49107.8	83016.6	31247.2	52654.8	58646.3	34302.1	62046.6	47368	56008.9	28232.2	51492.2	57731.3	68650.4	67710.7	43544.5
Q569Z6	51855.7	49187.3	34088.7	44872.6	37833.8	22654.6	65010	27348.1	53841.3	54109.1	100681	42556.8	74631.2	65492.5	75777.7	82781	41554.4	26047.8	67941.8	46757.1	37009.3	24976.1
Q56A08	27297.9	21381.3	19060	16784.6	23385.6	30048.9	24794.2	30169	135937	32136.5	38891.9	30151.6	18738	30686.1	15031.8	32639.8	16979.8	18277.7	43005.1	37700	43022.6	13584.9
Q570Y9	59826.2	49716.4	36045.7	52570.3	56459.4	34420.4	57054.7	35286.1	76694.5	33923	46964.2	39400.6	46834.4	36442.7	38610.7	39885.9	34275	41481.1	55106.2	45145.3	78218.2	39531.5
Q571E4	68574.5	45645.1	38434.1	52330.5	40565.1	57795.5	59294.9	34402.7	38412.3	36889	66548.3	54142.2	46324.6	34096.3	47713.5	55800.7	39249.4	35692.1	67696.5	53677.1	63650.2	32132.3
Q571F8	125160	158431	148422	150848	139569	123481	142803	154310	179211	110273	129658	129748	203395	259647	215245	232747	123295	138399	160984	91889.7	128676	143982
Q571I9	62363.7	53506.1	63750.6	52981.1	57465.3	62202	59242.6	54925.9	81732.3	70421.3	49480.7	59873.7	53349.9	81063.9	83826.3	59257.3	51888.5	48392.2	49111	49761.7	54195.4	59275.3
Q58A65	39334.9	33062.3	29333.9	32021.5	25887.4	33246.8	36843.1	42111.5	54113.7	47701.7	46698.3	36597.6	56081.1	45928.1	30426.6	42132.8	41554.5	33705.8	47236.1	66453.6	63692.9	35273.6
Q59J78	184938	187845	159101	145988	167132	171661	173784	150630	154483	138203	157055	96342.6	169585	103982	150732	125699	136041	132979	242116	294933	360095	155775
Q5BL07	28444.1	25922.6	27363.3	26626.7	25806.1	36071.3	26345.3	38871.9	50550.7	50017.1	30343	33194.8	28927.9	31532.8	37086.5	34250	46755.7	44744.3	45218	44612.1	50425.3	43136.4
Q5BLK4	10647	15735.5	12260.5	8333.05	14178.9	8390.11	4267.42	8737.22	54365.5	10706.4	7755.2	11882.5	7389.25	13300.1	15421.5	13029.7	7983.66	23048.2	8429.3	7765.12	9045.94	11247.7
Q5DTM8	32305	10173.3	7693.64	8140.14	9656.88	7767.6	10899.5	17004.4	117338	20269.2	6533.9	6008.82	9037.38	10310	6488.78	10039.6	10754.2	9118.25	6839.95	6517.37	8549.41	8242.17
Q5EBG8	165442	124933	91029.4	100840	87921.3	107322	126024	121503	119228	120185	112297	97897.1	134257	70647.8	69432.5	83679.3	97896.8	87005.7	119238	167054	226337	92303.3
Q5EG47	45659.2	46233.8	55683.2	42606.2	39153.1	44258.3	36982.5	27941.4	61070.4	48880.4	42862.6	42037.9	40070.5	55972.8	40083.7	50218.8	68667.6	37147.3	26621	46716.1	33066.8	38165.2
Q5F285	145191	198876	239502	261681	251368	204101	156936	172255	62671.6	128097	165533	194047	142659	309861	329954	240148	259444	213618	77038.8	139462	120330	195453
Q5F2E7	40169	29102.8	38585.5	31407.2	28031.9	42285.1	26348.7	44031.8	43403.4	43751.9	31329.8	41388.2	42217.1	23192.5	33868.8	48427.6	36702.9	24199.5	63561.4	57730.3	75836.6	31468.5
Q5F2F2	19440	21052.2	28478.7	21603.7	27536.2	17900.1	23003	29233.5	45356.5	28512.3	20777.6	32423.7	23688.2	26417.4	24983.3	24362.7	34820.8	23130.9	25813.8	14421.9	19447.3	34076.1
Q5FW57	647169	464411	345239	341937	343355	225115	424291	175437	157118	162680	319593	246942	352840	144776	256684	265513	242954	255522	243321	302199	267424	304563
Q5FW60	48735.9	32791.1	53780.9	26777.9	51390.8	34168.4	NA	NA	22988.7	17034.6	NA	NA	NA	19835	14276.1	NA	15591	NA	6288.54	16484.1	43114.3	34719.7
Q5FWI3	15207.1	24051.2	23538.8	26223.5	26979.8	19614.1	19510.4	16761.1	8016.78	5339.97	13952.3	14489.5	NA	NA	NA	18962.7	20098	22749.7	9998.81	14623.2	12478.6	17022
Q5FWK3	61502.2	49827.4	32602.6	50176.1	41467.1	31285.8	47491.8	67353.9	47375.8	42872.6	63768.3	48094.2	57474.4	89656.5	51332	50950.2	34925.4	48668.8	49752.7	33365.2	107468	41220.7
Q5H8C4	9728.6	6565.1	22365.2	20131	20610.3	33710.1	10262.4	18734.6	17057.1	14828.4	12999.4	12630.3	303566	28134.9	29302	23469.5	16131.4	20678.2	20700.7	18769.8	30138.9	20343
Q5HZI1	42038.8	39385.2	27751.9	20431.9	24556.5	24961.6	29389.8	26847.8	40126.7	28204.2	39451.4	30872.8	21843.6	19898.8	15103.4	25147.4	26513	22153.3	42231.3	39698.6	59977.5	18491.7
Q5HZI9	4616.5	10404.2	18661.2	27978.3	20148.2	13956.9	11037.4	13665.7	9226.4	5972.89	4791.01	4329.51	7230.56	13797.5	15199.7	7355.96	18904.3	16542.7	2202.3	5938.96	4377.15	14683.7
Q5I012	11630.9	9044.68	2418.62	8784.56	9439.67	10680.8	15801.8	7940.44	22427	13889.9	6106.5	11859.4	16223.3	6767.46	7453.99	5558.46	7585.57	6011.78	13461.1	12098.7	23969.2	9526.08
Q5IRJ6	9674.61	23026.1	35722.2	34706.5	33921	23253.2	18131.4	24524.7	38792.7	NA	21107.1	24994.4	NA	35927	38364.9	34692.3	25958.9	27784.9	NA	13881.6	NA	31316.2
Q5KU39	18508.6	15991.3	12619.3	14013.7	12294.2	16828.8	18703.2	5876.24	NA	7045.68	17889.8	NA	28465.4	12749.8	6885.38	24318.3	9170.21	16048.4	27528.1	9356.97	35304.3	13489.1
Q5M8N4	9825.28	8090.93	11737.3	11153.4	13129	6213.15	10412.7	3009.75	8997.29	4532.98	15732.4	12782.4	12381.9	27854.4	21034.8	28290.6	14641.6	20437.2	15575.9	12071.6	4085.32	19917.6
Q5NBX1	8441.23	20421.2	8333.45	8288.73	6831.19	13009	17812.5	19746.4	NA	18530.5	20803.6	16449	19040.3	14135.9	NA	7694.13	10373.7	14678	13632.8	17337.7	26311.5	7123.94
Q5NCF2	51810.2	74168.7	118430	122942	112548	99257.2	64339.4	86268	100565	71131.6	51757.7	79246.3	58606.7	101833	89262.3	61855.4	130115	107579	33131.5	86989.9	52834.7	103266
Q5NCR9	137336	69410.7	40002	45882	43031.2	57877.3	104846	67179	6657.9	48688.9	81958.9	99112.4	16262.3	110594	64366.1	70441	68590.6	42539.9	146172	40371.2	28788.5	322261
Q5ND28	5592.07	5940.25	3121.9	6163.35	NA	1926.98	5702.97	4966.42	NA	NA	3000.36	6327.69	NA	NA	NA	13491.9	NA	4391.14	3611.03	7095.28	7935.51	1622.77
Q5ND29	64385.3	50266.1	33158.9	24954.1	26026.9	51327.6	47978.2	49829.9	38869.5	49761.6	42412.4	34273.5	41291.7	29741.5	22717.6	40352.1	42270.6	40357	100774	123174	131273	26454
Q5ND34	20064.5	20482.4	34031.9	33876.9	32960.7	26242.1	7935.62	22820.6	37538.5	18628.4	9949.87	24711.5	10633.5	40066.8	3716.83	23508.2	26000.2	17956.3	NA	15927.3	NA	17344
Q5PRF0	1399.97	3573.25	4855.11	6762	4522.03	4239.8	9170.49	3060.17	1923.34	1655.28	NA	NA	NA	1789.12	2858.86	2582.56	3580.45	4978.13	NA	NA	1477.79	4615.32
Q5PT54	24054.5	28489.8	48187.4	38553	39855.3	26734.4	20411.6	17106.9	31627.5	17163.6	12993	19780.3	22306.7	31646.1	28128.6	28808.2	43963.2	31975.8	NA	NA	NA	39405.7
Q5QNQ6	47149	49469.6	48030.5	43853.7	48926.6	72559.2	51215.8	75289.4	79822.3	66647.8	56633	60496.7	72854.8	60091.8	68949	107248	88304.7	69430	59011.8	106489	80882.1	59790.1
Q5RJH6	7803.11	6638.78	6205.76	4407.45	2974.79	3716.31	6855.94	6056.1	NA	6091.82	3754.49	4815.37	5231.7	5785.37	NA	6202.65	2778.18	4765.39	4948.69	5814.76	4309.52	5064.61
Q5RJY2	1.11816e+06	1.05519e+06	1.27472e+06	1293306	1.20169e+06	1.07501e+06	1.21727e+06	979147	25124.5	939608	867443	1.07754e+06	NA	562028	707623	209263	1.22218e+06	1.0253e+06	764834	915107	650324	1.15039e+06
Q5RKZ7	57096.4	51555.2	48502.5	49946.1	58921.8	53442.8	52255.3	70741.8	51426	78155	55337.4	54067	65999.4	74251.2	57167.9	60414.2	58333.1	48611.4	68763.6	53136.6	50403.3	57412.8
Q5RL79	26504.5	29222.7	76609.5	39150.7	42012.9	46283.4	21061.2	61048.1	38741.8	49323.5	NA	36779.1	28582.5	44048.3	33400.1	31489.6	42058.8	27087.4	10437.6	35419	NA	65760.3
Q5SFM8	11830.4	10384.9	7002.06	10912.3	6131.46	25791.1	8615.35	5643	9509.94	11395.5	36582.1	10164.8	16672.1	8509.04	7308.62	9630.28	7228.26	5916.03	8698.35	14789	21354.2	5623.94
Q5SRX1	24408.5	24517.4	17834.6	16116.5	15462.7	21410.1	24785.2	18633.7	16570.3	19683.6	24759.4	17899.6	19908.8	12842.5	12705.9	20747	16115.1	16047.9	23298.3	25151.9	34876.9	15517.1
Q5SSH7	12376.7	13521.4	19484.5	18994.1	13890.3	9283.59	11396.4	13135.5	17342.4	14256.4	10622.1	10476.4	10152.5	16606	14917.2	9297.56	12813.8	16349.5	9010.53	13706.1	8794.99	21579.7
Q5SSK3	70021.4	68754.7	55424.2	58653.8	58380	59252.4	52383.8	54521.2	51242.8	45420.1	61053.7	46857.1	47563	75659.2	46559.1	85627	58790.5	63454.2	88095.8	77943.7	49292	66894.6
Q5SSW2	10141.1	12421.9	16148.8	17651	19641.1	14869.5	14483.2	18691.6	16818.3	14143.4	8215.28	11133.7	10728.5	16506.5	16089.6	12681.6	15968.9	18757.7	13164.2	17902.8	9485.7	18723.7
Q5SSZ5	13390.8	32118.4	27182.6	17863.4	12633.6	9768.54	26774.6	32721.6	46466.7	30939.5	19959.1	24474	43580.6	21399.4	34705	33659.3	51776.1	25795	28118.3	38370.9	37633.7	28007.8
Q5SUC9	62328.7	54193	53571.8	48543.3	49009.4	54577.1	59809.7	55872.4	66816.2	60288.6	53378.9	67432.2	69058.8	70317.2	63234.8	70012.9	50955.4	55885	61581.3	44960.7	73296.3	51167.8
Q5SUE8	9793.62	18608	24612.9	8009.17	5850.78	8373.98	7569.13	4885.86	5469.27	46497.3	20121	6137.33	11935.5	12351.6	4111.03	9704.25	57021.6	22593.2	19775.6	26249	28299.3	NA
Q5SUF2	43166.9	31443.5	45582	39090.7	41899.4	36949.4	31563.6	43983.8	36136.3	37985.8	21992.8	27101.1	13250.1	37859	28491.4	18658.6	31415	27767.4	11977.4	41645.8	47009.4	27661.3
Q5SUR0	37669.3	35604.4	40134.6	41174.8	40587.6	32618.1	40980	42711.4	42302.1	33636.7	45773.1	43099	34639.3	52692.1	40595.7	58893.2	44691.8	39930.8	34136.2	35633.5	31992.3	34197.8
Q5SV85	16874.6	12026.2	9825.01	7971.77	8967.21	9159.74	12951.9	8548.9	38679.9	11809.2	11935.1	8652.81	7340.95	8554.83	7423	8588.39	8863.69	8508.96	16490.4	13514.4	12256.2	11829.9
Q5SVR0	22199.2	18128.3	23578	20542.9	22341.5	30946.9	26619.7	20571.8	32649.2	29699.8	16015	19530.4	7169.29	14242.1	12900.5	9499.07	20886.3	21736.9	14547.3	18544	26789.3	22704.5
Q5SW19	54807.4	60478.2	81139	62533.1	83679.1	82376.6	54008.9	69838.7	78648.3	58482.8	50667.8	55358.1	46886.5	77448.3	73463.5	61714.4	82141.3	66974	45152.7	82093.9	57932	68910.9
Q5SWU9	33499.1	34388.4	70470.9	47242.5	48839.8	36952.4	38998.3	41481.6	67948.4	55160	44625.9	39587.5	33292.6	44111.5	49393	37535.2	104724	98121	69552	101651	54716.8	110513
Q5SX79	30320.9	21115.1	12941.4	13385.7	13049.2	16575.4	18654.3	17474.2	64847.7	15895.3	21320.4	6012.2	13953.6	11799.5	10181.5	11324.1	12018.9	14823.8	21246.6	19217.7	28302.1	15424.3
Q5U3K5	43822.6	36385.5	32389.2	37592.9	31996.8	33334.1	46740.3	48001.7	36593.5	41715.9	32562.4	35280.3	34688.6	32764.9	31652.3	16934.4	32602.7	32886.7	45356.4	49473.6	78559.6	24787.5
Q5U430	27099.1	20455	21348.2	25111.5	16476.8	24798	27258.8	25531.2	40410.6	27335.4	22744.1	39143.2	18752.6	43990.5	19826.5	31648.8	17913.8	20221.1	28042.5	24864.3	41439.2	20758.9
Q5U458	29815.6	33564	46486.7	49794.1	48861.3	45819	34627.7	38709.1	44696.4	46114.3	25701	34965	34607.9	38449.2	54868	44850.2	45134.1	45147.8	24529.6	40012.2	34967.2	39393.1
Q5U5M8	30630.2	27746	19029.3	25018.2	18432.6	23361.9	26923.7	21625.7	78066.4	32415.4	24695.9	19421.4	27184.4	11280.3	15258.2	23232.1	15346.8	20097.4	33077.5	38366.2	51179.7	18555.3
Q5U5V2	75285.8	60254.8	85113.2	72437.3	83552.3	103359	68022.5	95004.8	43578.1	90961.8	58678.6	82606.2	63973.9	85138.1	82718.9	55908.3	109164	76298.1	39682.3	42877.5	56267.5	73696.7
Q5UAK0	2416.62	4174.58	2914.77	4388.78	5569.84	3807.98	6320.52	2854.98	NA	NA	5830.9	3294.3	4566.55	6685.37	NA	6703.53	3947.45	3340.79	NA	1945.21	NA	2553.17
Q5XG73	69205.8	72866.7	60615.2	51121.8	61615.1	66119.2	80123.2	59729.5	85815.3	42369.1	83214.6	68207.7	89340.2	113747	101738	74251.8	63975.5	71056.8	112871	139335	146811	78793.9
Q5XJE5	38487	36403.5	15292.1	27217.1	13447.4	34160	41788.8	32872.3	20510.8	38632	27310.2	26810.3	35634	7187.81	15620.2	26778	28115.1	9190.12	46176.6	54384.9	66756.8	25690.4
Q5XJY5	52281.1	49831.7	60076.1	70008	71829.6	48205.8	37335.6	42315.5	47268.8	47803.1	46946.1	45965.5	42129.5	53223.1	58603.4	35351.9	65723.8	65626.9	39689	56287.9	40255.7	45239.7
Q5YD48	106895	80619.8	74265	90759.9	93342.9	114537	83314.5	96286.9	133480	89509.8	90990.8	85919.2	102470	95973.9	112704	101860	104716	97815.8	99998	95202.6	78499.7	103453
Q60520	33389	15846.4	42717.3	13911.7	8081.96	12247.1	23072.4	36420.9	17179.8	17465.9	14763.2	7146.47	32570.7	14988.5	14464.7	17822.4	11130.1	16130.3	18632.1	25023.3	53981.4	8830.35
Q60575	51655.1	13527.3	23278.4	26646	15986.7	24656.5	26890.4	38486.4	287045	129386	52891.8	21095.3	79969	135630	65659.6	31144.3	32516.7	49734.2	62687.6	28819.6	66037.8	17741.3
Q60590	56323.7	41445.1	33520.5	70106.1	43013.6	48109.2	72785.4	32627.9	37171	35113.5	18657.6	38617.6	70809.6	33457.1	67276.8	39536.7	53205.7	43859.7	85336.4	92484.8	107310	72202.5
Q60597	68108.2	57651	96460.1	90701.4	87713.6	83127.6	83228.3	89545.9	100226	84309	81105.4	83160.3	80491.9	142472	138047	90023.3	97604	101194	82795.7	76057.1	84014	93582
Q60598	131908	110028	94518.8	93392.5	93197.5	116633	102402	123202	119163	155442	187012	135210	145965	124570	109580	143681	104041	86429.5	177134	200624	324128	99385
Q60605	132256	57819.7	67026.2	79730	48170.2	57708.2	86491.3	83400.6	113374	149610	147109	105748	140735	64886.7	84291	126716	72429.7	74262.8	137440	232321	324452	79029.5
Q60631	83738.7	79713.3	51312.8	72626.9	52051.8	73620.4	93592.8	73562.9	54647.7	86785.9	63005.3	67073	68961.1	38489.3	50962.9	49444.4	65837.3	61642.9	98360.7	102693	138935	67285.7
Q60634	16978.7	30402.6	41093.2	42388.1	44152.3	31663.9	33414.1	48348.9	53247.9	41236.9	31539.3	46588.9	32163.7	61329.2	56463.8	29318.6	44885	49751.3	30304.7	29767.6	25511.6	37782.5
Q60648	469449	330097	369168	221319	212863	329816	360744	407658	282406	411454	341554	358849	354853	427679	329757	340587	260985	254246	497828	531478	932133	445297
Q60649	40567	45364.5	48952.8	53426.2	45852.1	45751.7	47427.5	52783.2	54319	37669.9	50156.2	48717.8	40158.2	55700.7	54209.2	50377.3	44529.9	43000.8	38407.2	35565	23504.2	52489.8
Q60668	95372.3	77380.2	85932.9	75713.5	43895.7	52808.4	101583	96183.3	148077	192558	113036	95319	215831	115895	94882.4	109304	57384.2	52196.7	107769	69157.2	63515.2	73794.3
Q60676	29425.6	31388.1	26084.8	28862.9	26724.1	38096.4	33697.8	36281.3	33560	29047.4	28796.5	31937.2	36144	25242.3	27424.8	22378.8	32985.3	26432.4	30658.3	25059	30136.5	28215.2
Q60692	127638	93120.9	155583	120322	159195	132023	103059	121422	365968	130840	115934	129906	104340	103285	156167	129163	177099	133293	113815	180457	178579	155545
Q60710	73726.1	56687.4	64322.2	126978	64666.8	54302.1	65197.8	64590.4	77429.2	67449.4	43188	71319.5	61054	49013.3	58375.6	47872.6	65076.8	42096.1	26440	29781.3	38854.9	40197.8
Q60715	19949.9	23092.8	28560.1	11943.3	17417.4	35239	14372.6	24002.9	23655.4	36053.5	11306.2	19727.5	22017.5	14222.9	17897.6	19154.7	12614.5	20997	33367.6	41860	45369.7	25345
Q60737	59480.4	50232	81564.2	43505.2	45722.6	65923.8	50162.8	58922.6	48539.8	64653.8	76035.2	66478.6	62667.4	51595.8	46930.3	57428.3	47801.6	47737.1	70901	48050.4	71117.5	48361.8
Q60738	45775.4	32052.9	32685.1	27170.7	24289.2	34795.7	31498.1	50112.9	43658.4	32551.7	43086	37935.9	59620.7	39853.7	30691.3	40697.1	37675.3	37247.2	54829.4	70811.9	87310.4	25867.6
Q60739	28071.1	20979.4	32331.3	8378.83	10129	21057	30187.5	24252.4	35282.6	32974.6	33350.9	16564.7	27108.4	13045.2	20913.8	42492.9	22845.8	8615.8	24883.7	33548.5	40444.2	34529.4
Q60749	115744	62862.9	52053.5	59433	92647.2	108505	67092.9	101752	50522.7	103395	107710	107172	119948	88538.7	85496.9	92060.6	88417.1	91836.7	118397	54419.4	119528	100429
Q60754	19455.5	14069	19704.5	17866.5	4989.84	13776.7	12197.4	14074.5	14603.8	15076	1	17363.9	50235.3	13408.8	12566.5	15468.4	34719.3	25216.3	39748.8	15794.4	27132.6	12520.2
Q60759	110861	148981	201678	258116	242406	175295	156313	121181	195745	116110	110374	147555	140982	214128	279534	182330	252340	254819	52590.2	161241	87752.3	200768
Q60766	56515.8	45464.4	61172.9	131550	68109.2	52557.7	41770.9	61330	61354.5	59700.6	32031.1	46188.4	38969.8	58938.3	47277.6	34656.4	46022.5	37636.3	52157.8	26569.1	36505.9	50571.2
Q60770	42764.1	36997.5	54283.3	49178.3	51387.9	46265.9	49393.8	56183.2	88973.8	45591.2	30690.9	42053.2	35390.8	50245.5	37733.7	46143	47569.9	38982.4	24741.9	26307.1	42427.2	52340.6
Q60772	69005.1	63095.5	29278.1	26535.6	42143.1	71760.1	56414.2	44237.3	29863	77348.6	80144.5	79334.8	58824.4	37431.4	45175.5	55697	47662.1	42283.8	68274.2	129405	117742	46434.3
Q60778	65058	70666	62430.8	55396.6	67443.8	40341.6	65115.1	39393.5	52365.1	19352.4	47049.1	44809.9	43286.7	27774.8	37765	15361.7	41686.6	54490.8	25773.7	60049.9	59036.2	59362.1
Q60787	37467.4	19291.3	NA	26709.8	39178.7	16294.1	29039.8	NA	NA	79549.9	15058.2	32944.6	46149.9	21333.7	4019.23	NA	NA	NA	26390.4	34701.6	53998.3	NA
Q60805	43480	25936.3	17112.8	24264.8	23522.3	31567.7	24042.8	45369.8	50655.7	38909.4	30755.9	NA	69727.6	63604.5	16949.9	46162.7	57027.8	13176.1	27820.3	30636.2	26933.9	32898.9
Q60823	46481.6	42433.6	53125.8	60508.3	52889.1	46960	40610.8	44080.5	31865.3	52109.5	29910.1	27605	30524.9	29835.7	47765.3	34550.9	56042.5	52868.9	26765.2	33884.5	35470.1	53085.5
Q60854	46607.6	65547.2	116412	78340.4	87187.4	75559.1	69755.6	64185.3	87434.6	70609.9	64447	45669.8	64151	104491	111612	81314.1	94080.8	92015.5	49680.7	85414.5	72472.1	96762.8
Q60855	12040	13443.7	8571.57	10393.5	9406.58	13913.3	17266.5	14841.1	10897.1	16035.9	12416.6	11858.6	21610	10057.5	9978.34	14087.5	10589.8	9230.09	22128.2	26028.2	38501	12337.5
Q60864	161362	158072	150865	95402.5	116996	132068	162747	114779	210501	125063	153530	146839	154889	117161	132609	118409	148088	110191	132115	207252	298455	159470
Q60865	188620	180996	108733	99211.4	109823	126291	156423	115306	181190	149246	145599	84453.8	119728	82818.7	53504.7	113203	89806.7	109332	235546	325092	335388	111337
Q60866	85739.9	85208.3	107073	127595	102879	79058.8	79379.2	75966.1	95870	76203.3	79376.7	81150.4	57610.6	66033.1	53120.5	55156.7	96489.5	77334.7	71895.6	50967.7	50600.2	106704
Q60870	3351.06	NA	6024.06	6495.74	7796.95	27068.6	NA	20901.3	17853.1	23707.7	NA	11995.4	22957.9	5193.27	8840.28	4654.07	15095.4	16736.5	14068.7	29494.2	16241.3	17778.2
Q60872	48540.3	33692	20599.8	30519.4	29487.4	38014.2	34772.9	28805.4	21756.1	45765.4	46745.5	37409.4	57862.3	10668.4	15870.8	34598.8	20316.1	17500	52070.2	71078.4	81581.7	29721.2
Q60876	165693	117032	91996.9	73473.9	80951.9	107439	120694	119150	118157	117713	182679	148133	168874	89513.1	123481	109092	118751	92274.2	212093	332237	247237	82405.1
Q60902	55682.2	49454.8	37716.9	37499.7	37833.9	50183.3	54605	54105	48403	56534.6	56377.1	58390.3	56711	44132.1	34806.1	54128.1	41850.2	32445.2	65300.8	56508.6	77369.5	38247.2
Q60930	106638	154252	187276	160321	181747	209167	147376	123814	157035	106191	131019	153666	95619.8	211819	137591	191099	173118	162817	133883	201038	86220.5	160028
Q60931	97390.9	104127	174431	152386	150318	167223	111206	113662	158351	117252	113713	144230	102745	191873	187798	163956	186696	152290	70740.3	100622	68286.4	153556
Q60932	272354	334419	442417	370984	395667	339620	306599	242150	348861	290022	259790	308176	226860	441436	407681	286481	336651	349918	276439	341030	254909	390775
Q60936	127798	117852	125408	92328.8	103161	106026	111935	117806	202676	145884	115684	129837	118227	103797	119698	110664	105767	87030.4	120705	85042.7	200671	91809.1
Q60953	22602.6	18833	14661.7	29012	15233.4	15000.6	18091.1	20608.3	14959.4	24368.3	8977.4	8817.48	13837	8028.21	9743.12	8958.53	13357	11226.2	13004.8	11949.6	19954.8	16849.8
Q60960	46161	42790.5	35016.4	16739.5	21184.9	20686	42276.7	27058.3	49536.4	16405.1	75479.8	48173.7	71101.8	18801.1	20152	12361.8	19123.7	31631.7	40277.1	36760.1	30698.7	45774
Q60967	56703.9	88247.4	74298.2	52819.5	67220.4	60853	68517.8	60743.8	65665.9	62786.3	68262.5	100920	200391	74000.9	83533	77445	71989.4	78238.8	74637.8	94092.5	105173	64234.5
Q60972	57808.8	52248.9	42799	42508.3	46937.6	61198.9	68295.4	47036.8	45432.2	53741.9	37714.8	41858.5	53353	35858.9	33302.5	45423.7	35717.8	32633.4	46460.4	64439	92890.3	35850.4
Q60973	33905.3	36494.3	28429.2	34924.4	28719.4	40459.6	39461.8	35595.5	56136.6	39335.9	29975.3	30293.4	35446.2	26118.3	24801.5	29088.5	25772.6	23790.1	42669.6	51710.1	67458.9	22445.5
Q60991	32296.4	31013	53350.5	54565	43490.6	46668.8	858394	31941.3	39049.9	30646.4	1.0814e+06	74129.1	20989.1	3.75173e+06	115340	30764.1	37049.6	29229.4	1.47762e+06	490260	1111667	52829.4
Q60992	6716.13	10169.8	16128	17893.3	21134.4	11228.9	9766.75	12948.7	72984.3	9954.83	8562.21	9051.62	9236.94	11606.5	10431.6	12502.6	15678.2	11209.5	4057.1	10492.3	8326.11	20975.4
Q60994	2078.07	4787.31	9471.93	7340.79	7038.23	10784.3	5150.58	10157.4	11221.9	5448.94	6648.06	15458	25454.9	47991.4	44613.7	20132.8	14771.9	10756.3	NA	8359.83	6916.3	7418.35
Q60996	24888.3	24089.3	24537	30241.8	26914.9	30752.3	33624.3	27584.7	24151.1	24342.2	28587.1	24301.1	28800.8	23126.8	18841.5	23694.1	21213.3	29912.6	36510.5	44911.8	59190.8	28539.4
Q61009	92959.8	105010	95149.8	115209	88686.3	83520	126859	95107.4	87268.9	88812	106249	96681.9	101065	89563	112767	107815	61986.2	63585.2	97930.8	92233	148700	73169.2
Q61017	41526.4	17209.4	29087.9	27283.7	16979	19562.3	47183.5	35791.8	58119.3	41473.9	53254.6	26678.5	33851.1	33096.4	31391.8	42072.6	29220.6	16139.2	27873.8	39593.5	54207	27532.5
Q61025	14192.6	15150.9	8525.23	20100	13704.3	11803.6	15280.8	7175.12	12063.2	9235.66	8607.31	7901.23	10271.6	3802.97	NA	13104.4	11396.1	11245.5	15575.1	25921.6	25452.2	13604
Q61026	1514.22	4380.28	2819.72	2289.7	2724.96	1205.11	3960.33	2029.34	34362.2	1710.5	3058.58	2218.36	NA	3246.24	970.276	1806.96	2702.09	2251.57	NA	4738.73	3477.89	2643.83
Q61029	68179	116258	97223.1	101975	80313.8	65178.8	93085	64399.3	80399.6	81296.4	143291	85452.3	85115.5	108908	106953	147380	80542.8	90614.3	100629	94941.8	120307	76016.5
Q61033	31720.1	20113.2	13396.7	18697	14497.1	41415.7	22428.2	29861.3	36040.2	51613.9	49354.2	27081.7	56254	11768.9	12813.8	29874	32253.4	24822.6	40522.3	61016.5	79038.1	35251.5
Q61035	186087	153555	151975	133529	137714	148672	156615	157848	162894	105337	148974	140833	122308	152004	172505	169285	84715.5	98529	156249	82330.4	105350	129025
Q61037	25257.1	31821.8	27985.1	22403.7	3807.86	30688.1	32068.8	34130.7	67395.7	36952.7	29273.8	26923.2	37653.4	33261.6	10721.8	24698.7	34341.2	22924.2	29213.1	213266	39537	32929.7
Q61048	16872.8	20491.6	NA	10048.7	6199.26	NA	19057.3	NA	NA	7907.36	NA	NA	6696.5	NA	1	26685.2	NA	NA	NA	20798.3	26690.9	NA
Q61069;Q64705	25507.8	22324.1	17073.3	15998.3	14669.7	15783.9	22606.6	15866.8	11427.1	20863.1	29158.1	15818.8	15811.1	8289.55	12740.9	20625	12716.9	12637	31734.3	33166	36085	12982.1
Q61070	105633	147900	158566	160241	159274	157257	133421	170122	166876	156654	92886.6	129409	131609	109182	173140	86364.3	191360	180848	112655	152019	131298	193050
Q61074	100068	83110.5	56469.5	49431.5	54508.9	59710.1	87746.8	73498.2	80321.4	88220.2	96710.5	69085	78256.7	62023	69306.7	88209.6	36580.1	53531.4	98796.7	110408	148029	62394.3
Q61081	154010	136132	116055	121024	113525	131603	133904	146990	133509	170405	126719	107277	129789	87100.2	99432	95279.7	117983	124290	182966	217940	295145	122168
Q61083	10455.7	2892.13	6804.18	NA	NA	5021.9	NA	NA	45601.1	7285.82	NA	9503.11	NA	NA	8271.34	9796.19	7387.21	NA	11969.5	8276.69	10598.6	9628.79
Q61093	10662.9	12600.9	17635.8	32314.1	16303.1	20548.2	18622.6	23556.7	19251.2	12715.9	12218.5	10554.3	23874.2	23316.9	20306.4	20481.4	18607.5	13170.8	7219.31	15978.2	15615.6	13764.7
Q61102	25342.6	28268.4	45252.2	52926.6	41687.7	46286.9	30768.5	35932.7	37757.7	25061.8	26778.6	29196	22814.1	48597.1	60239.8	39981.4	47276.1	48739.7	27117.1	33407.5	31227	45172
Q61103	249985	246851	259109	226515	245398	356832	229545	256819	238875	190547	196706	220600	84973.3	94099.5	176697	127019	218274	381744	207232	126004	226482	459401
Q61107	26934.9	22783.2	35650	67288.9	28797.5	18975.8	27441.6	20012.8	32007.4	20314.8	8154.35	16497.3	11370.7	10163.6	18552.6	27257.6	12235.1	17759.8	19182.8	11616.5	17062.4	26911.1
Q61112	40843.7	34242.6	27255.9	27872.6	22219.1	33512.5	23815.4	32317.2	22655.2	34299.8	25773.2	32379.4	40834.5	19386.4	24704.9	38262.2	20339.4	20470.3	37036.1	41049.8	62784.5	22442.4
Q61129	19347	26173.3	26329.6	36053.5	24207.4	26961.4	42975.6	24856.5	34544.4	28532.3	23606.8	28300.5	35001.1	28129.8	51639.6	56277.8	32963.4	32239.6	20868.1	47905.1	40847.6	37143.8
Q61133	99425.6	78530	233163	141271	173903	132837	166674	142770	119181	112962	99271.7	164773	139235	154311	195595	115526	157795	134567	154692	84140.5	106925	162564
Q61136	43718.1	53938.9	33131	48337.2	63437.8	54607	50592.7	41579.1	54928.6	51611.5	41261	38988.2	36358.3	45351.6	53519.9	58529.6	47866.5	56437.1	34757.1	36712.8	43128.5	40009.1
Q61140	11832.1	6556.38	NA	8359.99	9548.89	9617.7	9756.13	13820.2	10060.6	12980.5	8239.25	5900.23	NA	11743.8	NA	NA	7454.64	6297.53	9268.22	10215	14809.5	11092.5
Q61146	46876.7	35804.3	32218.3	21026.3	27656.9	39315.9	31245	30762.1	45759.6	21735.5	45726.6	37699.3	42647.5	31771.9	33764	46334.2	33551.5	30535.3	38373.6	59176.1	73635.4	31012.2
Q61147	55163.4	44138.7	64410.1	48983	53811.1	54676	58792.9	75004.2	122094	62758.2	53803.1	56117.2	108262	168881	124337	204056	69253	62044.9	43813.7	75419	84979.4	149839
Q61151	30996.2	24403.8	29076.9	16240.9	23743.8	26405.6	29080.8	26448.9	18562.1	21988.9	26291.3	32429.9	26778.7	12887	21987.9	33762.1	17606.1	22283.7	23730.4	20494.8	30981.7	18698.6
Q61153	34316.1	54799.1	121204	118337	145747	66142.2	53096.1	96293.2	73429.9	41092	NA	10830.1	14946.7	NA	12843.6	NA	45332.6	28789.5	NA	8138.94	11242.8	37805.9
Q61160	35770	31124.4	14964	30640.3	15084.6	37100.6	25211	30015.4	54888	49459	60426.4	21473.2	58889.8	23478.5	28807.2	22326.2	16976.4	23900.5	56062.4	67366.9	105688	52830.6
Q61164	32788.5	42432.4	67985.8	26586.4	34035.1	25890.5	44087.1	24703.1	32260.6	51073.4	43910.4	37788.4	53655.9	49386.6	37602.4	35644.3	17198.7	34424.8	40878.6	63321.1	64037.3	33189.2
Q61166	67350.8	73531.7	44968.6	44277.7	51781.9	64327	66997.7	61797.6	108594	73530.8	81456	71984	72191.1	57192.4	67007.7	70354.4	53288.3	50045.7	89860.6	81133.3	120884	51169.9
Q61171	210944	56254	70865.9	92370.6	49055	73839.4	65055.9	70273.6	274968	60136.5	41778.2	72921.8	120445	78950.8	91932.3	57026.9	76405.9	53555.8	44975	31852.6	40184.2	46682.8
Q61176	1.26815e+06	1162156	1.11237e+06	1.2585e+06	1.14296e+06	1.26188e+06	1172909	1.69547e+06	2427957	1586205	1854358	1.93556e+06	2287130	2355806	1.53652e+06	2.09958e+06	1.36275e+06	1.51513e+06	1763150	750693	1.69221e+06	1.50395e+06
Q61179	16674.5	9802.09	5816.92	4079.96	4889.84	10062.5	13893	9089.4	NA	10930.7	NA	NA	4653.9	4549.62	4028.79	NA	NA	7036.54	18319.6	15939.6	34303.6	NA
Q61187	93119.8	79118.8	48311.6	47540.2	48372.5	63494.8	64150.7	69494.6	19550.8	76502.3	95213.8	61226.6	67530.8	49115.6	95690	54567.2	46187.7	51814.9	70163.6	78166.5	121259	41798.3
Q61189	96768.7	87083.2	69848.5	72035.2	69780.6	80125.1	77253.9	74766.6	118484	93927.5	114808	73581.3	105606	100518	95509.2	106269	63924.5	78882.6	143479	143062	169582	70253.9
Q61191	40862.4	41335.5	34820.8	30669.6	37511.2	38729.7	38462.5	46188.6	51205.8	55553.4	58927.2	39285.5	37844.3	44127.4	36741.5	35406	36427.1	30751.7	65188.6	48144.2	92756.8	33750.8
Q61193	2544.2	1523.04	8448.27	NA	10835.8	NA	6919.77	4741.47	NA	3490.17	3693.39	NA	5705.07	3036.56	NA	NA	7790.32	10253.5	NA	2833.02	NA	5720.77
Q61194	14958.9	17918.4	20369.6	15029.2	18195.2	20473.5	28129.4	19111.5	13615.5	33085.6	17686.4	15446.8	15845.6	9999.95	14070.6	13143.1	25497.7	20352.2	16560.4	29942.6	21967.8	28090.5
Q61205	23772.9	14423.5	22961.8	17439.3	18785.7	18899.7	21577.9	19822.1	112170	36672.8	46623.2	13122.8	30386	25537.1	37168.5	31022.8	15474.7	11943.8	25288.5	50391	29239.1	24701.9
Q61206	99663.1	76005.7	58603.3	57288.3	56774.5	50728.4	93530.2	64104.3	53948.8	69135.2	83620.1	56746.1	63882.5	38945.9	43242.6	50772.5	38539.2	43719.6	103671	98557.4	156572	45994.9
Q61207	195253	158302	83419	153196	103060	117585	253951	291772	171329	195682	223144	192479	421024	221765	117528	248856	206800	149057	171023	332218	487823	146946
Q61210	27996	20447.7	15241.5	22529.8	26110.2	16529.5	29451.2	25003.2	28060.3	22762.6	30086.5	27430.9	30800.9	26472.2	19232.2	22984.4	24311.4	28686.1	23420.7	26909.8	38018.7	25035.1
Q61211	36677.1	29370.7	28466.2	29863.7	24384.3	19480.5	23482.2	24852.2	22227.3	19797.2	28362.1	27730.1	20155.5	44421.4	35107.9	32045.5	24853.2	26004.9	26309.4	28788.3	24271.3	20433.7
Q61233	150369	130982	124290	141164	111551	128328	156500	155730	121618	219672	123046	145725	146666	121870	154083	164967	134829	123033	317261	184391	280306	109576
Q61234	51992.4	58770.9	78269.8	65399.6	71080.6	50456.8	57530.9	31984.8	72934.1	51907.1	59605.5	53665.2	36521.6	81612.4	70999.7	75244.7	52039	60031	42582.8	48412.5	27267.1	63744.6
Q61235	23980	22792.1	21870.5	34489.3	21212.2	49351.8	35530.5	51883.3	63364.8	63673.3	41629.3	13442	45798.4	16895.8	21187.9	18836.4	19096.2	29112.9	23238.1	23456.4	36532	22235.8
Q61239	20754.6	25475.8	24414.3	25647.2	28812.3	27033.9	23134	22222.1	32846.1	29609.1	23414.4	23046.9	30069.5	21704.8	20013.6	10314.2	23191.1	28224.6	29256.8	32134.9	33944.6	28526.9
Q61247	51087.7	52379.3	23259.3	31333.5	36032	46149	54529.2	72805.5	69056.9	68511.4	32058.5	40231	87517.1	36791.7	50759.5	48258.9	37048.4	37167.5	70661.4	59462.7	95117.2	41250.1
Q61249	166416	156220	117034	115914	109274	137796	150597	153513	96102.1	173165	129501	127783	150760	95078.4	94371.1	89621.4	106083	117763	247959	221243	283424	127568
Q61268	139491	45061.6	92229.7	35379.7	60787.7	26883.4	72342.2	50605.8	81863.3	102301	91146.5	17548.9	90319.1	46525.5	78003.2	109801	22034	25847.4	62312	79748.7	126481	22297.4
Q61285	47224.3	53626.9	71716.2	49877.7	61200.1	54319.4	60401.9	66499.5	103056	76154.5	61777.4	88149.2	57507.1	72558.8	59093.2	46422.2	81679.8	82407.6	34774.5	36108.2	82410.3	85646.2
Q61292	3705.7	4556.34	6571.9	5401.57	2602.13	3752.6	5220.24	3995.82	NA	6482.55	5257.03	5212.5	3912.3	5207.47	3164.9	5663.76	2780.14	2775.3	3595.49	2721.51	3828.82	4377.47
Q61316	77224.2	78850.3	103392	88704.2	94022.6	97864.7	79787.9	95221.2	152390	83078	67639.8	75083.9	86476.7	91185.5	93937.8	91187.6	104998	91929.1	72510.6	92860.2	101494	78841.5
Q61333	1297.04	1557.79	2862.17	5656.15	4026.7	2729.61	3142.67	1350.06	NA	2898.81	570.736	2105.47	2024.75	NA	1390.54	NA	5039.61	3240.18	1666.25	1803.87	1915.8	5287.82
Q61335	35561.8	20639.3	20059.3	20875.9	11612.7	5343.2	21735	11815.7	119096	23084.6	15215	9372.63	72280.2	20229.5	31990	20124	12433.1	13160.3	33930.2	8878.01	20440.9	23203.8
Q61337	41011.7	26733.9	15146.3	21387.8	22221.7	25134.7	26929.2	20990.1	26890.9	29227.1	29576.5	22265.9	39487.4	22970.6	17957.7	41543	19533	17143	40228.6	43818.3	65990.8	17703
Q61387	32540.9	45291.9	36320.8	38276	38854.8	36920.2	32535.2	34346.4	89241.3	31240.5	43672.8	40311.4	30642.9	46751.9	48357.2	36696.4	38593.1	44554.3	48514.4	53574.2	56041.3	33827
Q61391	21394	5867.62	12628.2	8699.27	14502.7	11533.3	23654.7	24848.7	4474.37	13517	4400.37	5673	23474.1	14035.8	13314.2	4257.07	14030.8	8029.39	60131.3	21243.4	35935.3	10857.5
Q61409	20378.5	11608.9	14433.6	8086.75	18874.4	7064.46	11257.3	8833.35	19397.9	4662.08	14859.1	13619.3	14821.5	17024.9	21648.6	6958.14	15956.9	16140.1	12711.3	10069.4	14348	13928.3
Q61411	301742	368667	373962	391603	369568	180728	369898	387224	318674	293626	388154	290655	266102	457578	408198	373707	219324	302729	169186	177548	182880	315765
Q61419	55554	97423.6	133601	139959	180937	101329	43764.6	68141.8	20801.8	68309.3	29948.6	32272.4	36197.8	23211.1	34584.7	31822.4	99059.9	47972.2	45649.3	49993.4	61271	68221.8
Q61425	164220	158428	126491	164005	174009	177090	142245	158970	279161	137746	144692	140381	174330	139045	161398	114245	203343	139931	97612.3	157270	137553	127510
Q61464	24808.2	18756.5	15767	21611.8	22277.4	19527.9	21665.9	22320.7	33310.3	18085.8	23073.1	22545.1	18104.5	18521.4	14643.7	25569.3	19009	16720.4	18529.6	24250.3	29308.1	21916.7
Q61490	98329.6	94040.3	70548.7	67533.5	99707.7	99600.6	88223.5	90446.7	152448	82892.1	81835.6	85336.9	124819	105999	62947.1	90833.4	54267.8	72412	98182.3	80298.2	155697	80388.8
Q61503	27939.4	33790.9	29275.2	21455.6	28242.1	28704.4	27671.7	44746.3	26073.6	39326.8	44060.3	32124.5	49979.6	34884.9	27334.5	64451.3	32883.7	23290.7	34727.9	34625.4	33954.5	40596.4
Q61508	46809.1	49985.2	29441.1	42885.6	42224.1	30872.9	55419	58252.5	49434.2	96068.2	59357.1	45946.1	94817.2	32526.1	65346.3	70795.7	18752.3	39345.4	67662.9	75490.1	119582	31286
Q61510	48814.7	40564.1	40371.4	41858.1	28503	36951.6	26699.7	47396.2	70272.6	49580.2	34618	51966.6	55134.9	33370.3	25500.1	36644.8	35118.4	41403.2	61979	47947.3	54504	45975.5
Q61526	7730.17	5401.98	4301.15	4551.56	1626.13	8067.43	4060.29	9567.45	7551.23	6102.47	5661.47	8597.78	3933.02	12835.8	7976	5422.39	5686.55	3757.18	2628.38	4419.35	6287.8	6560.67
Q61543	27142.2	24728.3	21986.4	20069.1	21013.5	28538	25926.4	21823.4	38601.6	33749.8	34571.7	23640	13297.3	28181.5	22024.3	21386.6	20127	18423	33125.5	21028.9	29585.9	29416
Q61545	82413.8	139158	105929	123757	56059.3	57954.6	99923.2	164638	73399.2	93234.5	174109	77886.5	80658.2	108960	132153	183850	108774	52351.8	89818	91815.1	108454	105092
Q61550	24210.8	14553.5	16377.1	16674.3	17940.1	20730.2	20164.9	19942.5	19668.5	24781.2	32371.1	22479.7	21955.6	19596	16831.3	25721	15034.5	16339.7	18467.9	31323.7	36787.8	14995.9
Q61559	285859	260521	204893	172619	166957	211825	268040	196514	147494	226072	218947	232377	416571	138615	94572.5	148596	222287	198027	416854	456609	569312	106525
Q61578	131382	134057	196248	191269	179509	106396	135880	97040.9	132472	103201	121823	135479	113310	124703	169037	123149	123791	123152	115206	71091.8	68908.4	150034
Q61581	13045.5	14825.3	13732.8	13577.9	12948.7	12841.3	17265.8	15792.6	21449.4	14080.9	13368.7	12254.8	17893	11558	10404.5	18459	15918.6	16651.8	16511.8	20762.4	33175.2	12690.7
Q61584	26393.8	24402.6	41775.6	35938.2	35027.3	28786.4	32818.8	22988.1	45381.1	27496.9	24913	28691.3	17146.8	29099.4	35767	23928.9	35522.5	33918.9	27697.9	27580.7	23641.8	36310.2
Q61586	6774.14	24731.6	36729.5	29005.6	48852.3	26036.1	12896.5	18764.9	36148.3	42071.7	18608.6	26687.5	21983.3	42844.1	49798	54159.8	53092.2	88066	25966.1	58360.6	29877.8	56635.7
Q61595	24351.5	25372.3	18520.8	18757.9	20083.3	22339.5	27212.7	21438	23521.9	22550.5	23458.4	21462.2	22819.6	21127.3	20304.4	29247.4	20592.2	17056.3	24851.2	35179.6	42370.4	16079.6
Q61598	89752.8	87977.2	136112	106440	126576	113864	66490	89987.8	142014	84999.8	103159	96926.7	86322.7	134657	117076	90964.9	165462	115695	57005.6	102967	78190.5	107296
Q61599	34478.3	17354.8	36246.2	55972.5	36685.2	32790	33285.7	36267.7	102954	46950.8	20690.6	31614.2	27990.8	28351.1	25035.2	18968.8	48721.1	29613	11849.1	17105.7	65766.5	35174.1
Q61646	130556	63234.8	49531.7	99467.1	43805	46435.8	62621.1	100593	187988	103082	106308	103580	84979.6	89561.9	61710.8	63220	83394.8	50263.3	252752	80746.8	158341	73406.5
Q61647	1.56769e+06	2.21661e+06	1730360	1.79234e+06	1.64449e+06	1.83668e+06	2.09689e+06	1.69136e+06	1.63246e+06	2101435	1.85788e+06	1.41772e+06	1.44369e+06	1.11393e+06	840459	1.51749e+06	1.51877e+06	1.76566e+06	2.37469e+06	2.06603e+06	2.90266e+06	1.67269e+06
Q61655	21014.9	37627.2	42076.8	49801.8	47711.6	31389.5	19634.5	41415.6	31760.1	31292.6	30658.4	28480.9	23318.1	37549	39205.9	45481.5	36559.1	45128.4	16922	32437.6	35472.8	47711.7
Q61656	166259	167985	136235	147880	152744	149947	169789	168963	112282	174113	193807	183230	189313	169515	162783	184750	158880	130452	201308	114627	126833	151845
Q61686	40340.4	26478.2	19072.1	15611.9	16589.1	27858.7	38101.5	25601.6	28883.5	33431.4	22847.6	21833.8	25315.4	15560.8	14539.2	22322.3	17852.1	16516.4	35279.5	36566.2	61517.8	23637.2
Q61687	54518.5	17668.2	18919.1	10465.8	13099.6	11383.8	18959	13936.2	10223.8	11934	30897.8	18674	13477.4	17614.8	18970.5	18864.7	10886.4	3993.43	15888.1	16516.4	18818.2	12751.3
Q61694	36618	18212.5	40230.3	23006.9	68790.5	44691.9	249342	57811.9	125905	63799.4	41777.1	307473	23239.8	222285	832143	25108.6	46531.1	67852.6	634834	234792	158815	79418.9
Q61699	94047.8	93860.8	72927.9	100828	75483	80277.5	80953.1	88225.4	66158	79687.6	58960.8	63549.4	63939.2	54375.7	60378.2	54494.3	70909.2	83350.2	83069.4	102430	81987.8	87957.1
Q61702	38978.2	46691.7	60234.6	71824.7	61821.9	42456.7	56789.3	65036.9	82160.4	63908.3	43641.9	54609.6	60769.1	80402.3	77316.4	55808.3	67387.4	66095.1	26734.3	41155.1	41519	72546.3
Q61703	29583.6	33901.7	34520.6	36175.7	40477.5	41292.7	42144.7	52113.6	47934.4	39909.2	35947.6	45307.9	45824.5	57660.6	68072.6	38553.7	42954.3	41868	26522.5	37171.2	39196.4	40035.1
Q61704	31186.2	25528.7	34312.9	34736.9	35320.8	52112.9	22051.3	32374	61023.3	33984.1	28237.2	59478.1	48442.8	77626.3	64736.3	61107.2	40902.5	32138.3	13400.7	36872.1	35712.9	38636.4
Q61712	50759.9	29864.3	37252.7	38528.3	37191.3	37904.6	34114.1	34418.4	37521.9	34525.6	39176	42606.8	38696.8	46005.8	37858.6	45401	37054.1	40786.1	72283.4	54026.9	67631	31823.4
Q61730	44644.6	45273.6	38769.5	24225.4	21118.4	31451.9	25286.4	13570.9	18107.9	16966.3	36562.2	28203	39908.9	39034.8	56675.3	40791.9	31686.8	29606.5	41293.2	66450.3	54884.8	20068.4
Q61733	40564	52478.1	27061.5	31153.5	35928.1	54694.3	31984.6	26692.3	61907.5	26811.8	44467.5	32116.4	50152.7	37491.5	40843.9	69809.2	28519.8	32725.3	44779.2	68944.6	71375.4	34524.1
Q61735	220562	205241	222965	238734	233169	237535	241430	271415	245544	235729	227477	229553	254309	219395	240375	302402	187064	200479	168461	218718	299196	170336
Q61739	7681.83	9227.56	12088.6	9028.13	8623.18	10181.7	11283.1	11728.5	26695.4	13332.8	9327.71	10983.5	15711.2	18813.5	11704.5	16499.8	10594.2	9408.47	9787.53	12656.6	14100	11427.8
Q61749	24045	32552.6	46077	46877.2	35582.1	37220.5	24279.2	27234.6	36303.4	26702.2	20191.3	34245.1	23405	31377	28919	42673.1	47887.8	33330.6	25432.9	36650.7	45053.6	43694.8
Q61753	572.771	NA	NA	2716.22	NA	NA	NA	NA	1381.27	NA	NA	NA	NA	20756.5	1647.09	NA	NA	NA	1	NA	NA	303.997
Q61768	58971.3	57105.8	49438.3	48909.1	45020.1	45594.9	55170	54982	56868.1	59573.1	51651.9	46532.9	65247.5	50636.1	49263.8	55541.7	40011.8	44021.4	65685.4	66098.4	77253.5	41428.7
Q61792	207362	198501	159681	190955	98007.5	86150.6	113646	136907	169734	136829	103057	79542.4	181475	375217	141960	139353	68106.2	217481	150548	132000	273341	149013
Q61823	101364	111542	66506.6	109438	82186	93964.8	92597.6	76184.2	68586.8	91567.5	63118.8	92758.6	153573	69092.3	93872	103182	91649.7	76051.7	110214	83767.1	118446	68367.2
Q61830	28469	34535.9	52403.4	54770.9	45475.1	39559.1	39158.9	39353.8	54936.3	28391.9	19741.3	31255.2	26352.3	38020.8	40891.9	28826.2	37168.6	34153.1	11066.3	19102.2	25908.9	38198.2
Q61838	110035	117101	140632	144597	147289	146078	142154	162936	141628	103992	126957	136457	325244	259249	368875	207172	145107	124239	77965.5	126583	118960	127213
Q61881	19735.1	19359.2	17228.7	49978.7	6693.6	9231.43	12039.9	NA	NA	6817.29	18659.7	NA	NA	NA	33330.8	20441	29661.4	20050	15113.8	12273	20788.4	36644.9
Q61937	228310	120680	98984.3	80572.5	94277.8	131886	59241.7	146958	179398	217679	199132	175243	216679	178636	229897	251530	132967	193696	204872	204420	400514	118271
Q61990	85945.1	190808	157754	138022	199577	150039	150806	173740	69551	133095	129948	139874	206530	151813	172195	163463	122948	151650	201764	179054	207602	104880
Q62000	17043.8	33848.1	69625.8	42039.9	44734.1	21000.4	14501.3	18228	56479	47769.4	45309.3	54911.9	32079.6	50983.1	37188.8	53466.2	18805.7	24474.7	17971.1	15043.5	12452.5	36542.4
Q62018	14280.9	10726.8	19332.3	19106	17885.3	16569.9	17889.6	17430.1	17811.2	17774.8	15142.9	14376.1	16177.9	25671.9	25804.1	14862.5	18311.2	16101.4	8218.83	15680	9524.81	19443.6
Q62048	66582.9	44400.3	64279.3	66554.7	50660.2	44127.9	55769.5	53469.5	43154	73198.1	71409.7	49869.8	53786	47436.6	51351.6	55875.6	37847.6	54798.2	67151.5	94878.1	138891	70690
Q62077	22528.8	27142.6	36969.5	33707.9	38088.5	14860	104382	18864	24227.3	13488.1	29546.9	11361.1	NA	18266.9	51945.7	11714.8	19009.2	25682.5	6798.84	15911.1	14544.6	23533.8
Q62084	7567.58	12865.6	7742.3	6154.58	7059.93	7361.15	15277.8	11024.1	13416.5	5213.66	10855.9	5727.44	12047.1	18265.4	11506.8	15021.6	10224.6	11871.9	23454.8	8835.46	10958.2	14093
Q62086	29034.1	61083.5	42033.8	40126.2	41950.9	50795.8	24226.1	41949.2	22143.7	45407.2	12834.2	62675.3	69068	30133.3	23996.9	18548.3	39386.2	31469.1	30850.1	23370	50116.5	41061.5
Q62087	45688.9	44032.7	74744.1	69095.3	76681.7	65629.9	35415.4	60328.2	104333	76015.2	47226	52610.9	47702.7	61048.4	64862.8	73034.1	92061.3	65240.5	44679.4	66651	47559.9	70742
Q62093	336994	424660	208163	219144	264271	137364	289856	417169	314799	243107	325141	226369	248646	182895	369568	523924	146305	195724	250314	386232	375939	252374
Q62151	171228	51068.3	40863	51992	40703	49712.9	35686.5	19685.2	41262.5	28112.1	47652.2	5708.63	45265	38168.8	NA	NA	40314.7	29188.2	NA	26962.9	NA	35036
Q62165	67054.7	39203	29514.9	34484.7	34922.9	61684.5	55163.3	75126.8	61249.7	56301.3	64473	58395.3	71461.6	40144.4	43886.9	47061.6	40571.3	35942.1	72738.8	98124.2	128417	46789.6
Q62167	117999	50496	20508.4	33524.5	40395.7	166491	88766.7	119172	191231	253965	122157	130660	40121	131896	37633.7	140626	39553.6	54960.6	167480	90979	103365	29331.1
Q62172	23960.7	26796.7	NA	31596.5	15047.4	35585.4	37327.2	39891.4	35406.8	27091.3	29673.7	72820.9	31236	NA	32021.1	21454.4	59608.2	124151	23511.9	25385.1	35601.6	41782.7
Q62186	28091.4	37017.7	83164.3	87457.8	91557.6	68621.8	31011.2	51340.6	71473.9	51415.6	31981.8	38181	32269	50206.9	43138.1	42082.4	72745.9	47582.8	17857.6	45719.1	20300.2	65690.9
Q62188	21890.9	20180.8	25546.3	32993.5	26071.9	9028.95	24411.8	26619.2	24782.8	16008.5	21556.1	16788.1	23621.9	21755	25082.7	25375.7	15496.1	15428	20856.2	22308.1	33109.3	17558.1
Q62189	127009	68121.1	53283.5	62592.4	79813.9	72611.4	80725.7	131517	130349	99314.4	101478	98117.5	190938	70389.3	82371.9	131083	89045	102113	145991	186458	107752	51499.2
Q62192	9368.42	3614.24	NA	12141.2	7346.92	7767.95	10599.2	NA	5497.26	14350.3	6159.46	7124.76	10766.1	9652.45	8142.92	NA	8021.01	NA	8919.42	8329.49	22147.4	6897.48
Q62193	1607.13	2849.37	2320.72	3756.27	3345.43	6411.83	3265.14	NA	NA	NA	NA	NA	NA	NA	NA	16891.4	3585.89	NA	3283.94	30432.4	18489.7	2269.58
Q62219	10444.7	7817.73	8820.01	8786.15	3820.93	4144.92	9083.02	10022.9	10790.3	24295.3	15728.1	9220.55	12806.8	17201.8	10404.8	24183.8	16684.5	14285.4	16515.1	16940.9	9006.24	11561.1
Q62230	8800.65	10549.8	17801	14219.7	13924.6	13526	10487.1	13406.9	5750.98	10378.6	11015.4	28517.7	12890.3	24598.2	11582.3	45900.6	4901.07	12975.8	11756.7	7050.85	13747	8410.6
Q62241	47031.4	10456.4	47171.2	43948.5	44795.1	12499.2	29550.7	14643.5	27284.2	23225.7	69031.7	35219.1	17883	24704.8	99913.7	19635.8	24539.4	60747.4	10362.8	23685.8	17283.7	4938.8
Q62261	54242.2	49006	47487.2	49809.7	40773.3	50399.2	65689.9	52791.2	61530	59003.1	55101.1	51284.4	54323.1	47163.2	43187.1	55356.2	44809	43927.6	61588.1	54061.7	72127.9	46287.1
Q62264	26855.9	33536.1	44572.1	15222.9	22033.9	50457.6	41872.5	43477.6	32302.7	55148.3	25036.5	41958.6	34704.5	71909.5	22200.1	12632.1	74525.5	70854.8	161898	208617	154811	53634.4
Q62276	7379.22	21959.3	25603.7	5724.99	20905.4	6081.48	9336.03	8967.2	NA	NA	33252.7	12333.6	13231.1	21174.7	23351.9	27189.2	7726.55	20518.1	36756	18116.4	3987.65	22498.7
Q62313	13493.4	24231.4	17860.8	19765.7	25891.2	31448.6	7744.28	18067.8	22865.3	11087.6	19898	6301.53	23174.1	32689.5	30123.8	3483.33	20753.4	56278.2	32670.7	29991.2	35894.1	16636.6
Q62318	69400	125492	76473.7	87882.8	99109.4	73752.2	81039.1	99462.2	93125.5	126033	145187	122339	94730.8	105940	97288.1	89704	81780.5	70317.3	98921.4	104906	128393	100112
Q62348	94882.3	84112.3	69028.1	75732.9	77294.9	86953.1	81959.6	80218	105077	82445.3	108009	104627	100615	92687.8	104246	86193.1	90474.1	96373.2	84394.2	44186.9	83761	86512.8
Q62351	8249.85	3493.89	8419.08	8735.25	5537.03	7023.63	7279.72	2075.03	954.994	6616.77	2643.02	4361.28	11506.4	26752.9	14970.1	37234.8	7970.68	11572.5	9341.29	9054.63	10134.2	9064.62
Q62376	87202.5	61999	73287.1	81068.8	75994.8	57565.9	59723.1	71723	74628.7	86338.4	65077.4	60363.1	44420.5	66490.8	53683.7	74280.8	63234.2	53906.7	28870.5	103976	33475.1	69573.6
Q62383	3135.08	2524.11	4172.65	4517.36	4370.36	4334.61	4539.35	3112.56	NA	4810.12	NA	4840.77	1909.26	3223.82	3611.12	7554.77	3638.7	4950.41	2167.35	1666.04	NA	786.538
Q62384	44750.6	33573	37623.2	26690.2	37270.1	24710.8	34503.3	25953	39208.1	33848.7	34140.4	29516.1	20979.3	28716.4	22735.4	34552.2	27416	31429	49596.6	65683.6	64769.4	36178.7
Q62392	18006.6	30208.9	26943.4	37422.6	56579.3	26483.8	10678.4	6528.63	5000.06	NA	2448.8	2030.13	5234.51	2278.47	1742.81	4763.57	6905.69	9817.35	1914.7	4142.05	2586.91	10730.4
Q62393	96271.8	61294	56650.9	62237.8	54589.8	65197.6	79947.6	96326.3	71014.2	99585.3	57766.1	67291.4	76001.8	28607.1	34534.8	30687.1	65598.7	54661.9	128501	152412	169483	48740.6
Q62417	43023.3	21450.5	33435.6	50933.2	31558.5	29409.4	39528.8	31271.1	52519.5	49696	42354.8	38306	29297.1	36460.6	25945.6	49409.9	23441.2	25223.5	24781.8	31319.7	29512.4	26827.9
Q62418	75182.2	61623	58915.6	49049.1	34360.1	47328.8	71457.6	53367.9	116558	71786	90604.2	50285	52468.8	63889.2	50827.4	61366.8	56883.7	54576	64713.3	71214.2	106701	47070.5
Q62419	85465.5	50849.4	37410.9	35230.4	34393.2	71403.8	53706.6	68327.9	43538.1	77493.9	59853.2	67273.9	58885.7	38320.9	42415.6	60850.9	52619.6	46675.8	109152	109337	152532	40699.6
Q62422	173558	117597	102706	108247	137433	130680	105104	99872.8	143279	132199	142033	150494	131035	136786	72259.8	82952.3	88340.8	101972	144016	170676	235240	82567.2
Q62425	238541	75636.2	200468	132482	19756.2	539328	65141.8	485079	268906	405984	173689	268638	361393	298826	215500	136598	204826	163916	661894	347384	573074	127920
Q62426	120943	121864	144028	125724	156987	162000	116364	117968	167896	136574	113454	127460	145423	132908	116494	139216	133292	127376	113406	148204	169601	139078
Q62432	27949.9	36818.8	29910.7	26346.3	25785.7	25889.3	28704.8	24246.3	32872.3	20675.7	35662.8	24513.2	31274.1	63978.1	54604.9	35545.8	38413.3	26949.1	29600.7	47823.2	60097.9	30559.5
Q62433	65769.1	60107.2	44029.7	35797.9	42131.3	47643	34737.7	26950	45154.2	50809.3	23104.4	27783.7	31505.6	22816.3	22038.2	25564.2	15075.6	18414.6	36250.9	39367.3	48257.1	22655.8
Q62446	201870	94247.9	80379.7	125272	126213	117262	137082	142501	161694	183147	97284.1	95668.1	154867	106522	87349.6	106971	84015.8	108510	182580	192910	300191	94079.6
Q62448	62129.4	49107.8	47533.3	49615.1	45659.9	60769.6	46438.6	57605.3	44691.3	75366.5	55144.4	39400.1	62069.3	50022.7	34320.3	51812.1	37779.9	45640.7	84479.8	83210.8	112593	44061.5
Q62452	24523.3	39955.8	91490.9	87654.9	83526	62296.8	46851	17809.3	48386.8	53718.6	18281.6	15755	25953	74675.1	28885.3	27270.4	29750.2	30877.8	19596.8	20427.4	24546.2	71343
Q62465	56144	59959.5	69296.8	53834.9	65364.5	77832	88271.1	63875.8	89062.4	99470.8	46874.3	67300.2	84699.3	130364	154038	106485	112979	84485.6	68742.3	94729.8	80756.6	85301.2
Q62511	22479.6	13370.6	12870.2	16070.5	10514.2	8218.74	17143.7	NA	14650.8	17435.7	10442	17428.8	13873.8	13284.3	29043.8	9338.92	10499.7	13036.5	7884.38	18604.7	29656.9	NA
Q62523	27120.8	33218.5	29588	25605.2	30774.4	39255.4	39244.7	39584	61846.7	62950.6	33431	33782.1	49606.5	32936.4	31035.4	36892.5	51577.3	40094.1	46725.6	85350.1	95255.7	43884.4
Q63810	98731.3	81335.9	80596.9	61805	69254.7	58383.7	88391	91100.6	87134.6	89038.2	96920.4	73311.7	78794.1	53635.3	51597.3	70992.5	70262.1	67407.1	85776.6	115599	129052	75571.5
Q63829	72738	64352.8	49437.4	40644.1	52722.4	64205.5	66409.1	55135.8	48789.5	66996.3	59812.3	67102.6	75448.5	53667.6	46916	62085.8	48763.2	45905.6	97408.1	107323	119367	45538.4
Q63836	133992	37670.3	55696.3	64975	287416	62786.6	12550.9	61455	32962.3	48713.7	17515.7	12107.9	9731.75	17696.7	16211.8	23943.6	14466.8	16259.7	31650.3	7817.89	33717.7	28352.7
Q63844	103894	93196.6	147426	125906	85510	95261.8	130823	89509.5	100424	112988	69465.1	66902.5	113730	133372	133960	89862.6	125488	94515.5	91597.3	94347.3	129267	118124
Q63850	25091.8	18216.7	15860.7	15458.7	24338.9	22172.1	21986.6	18984.2	80348	25377.7	19522.8	41343.8	29997.3	24772.1	36217.7	18876.7	16722.2	18044.5	20394.4	24727.4	33108.4	10810.8
Q63880	280647	197137	219237	268235	357471	256359	66843.6	191233	256457	121174	64329.8	99430	105162	100420	92642.9	46385.8	123817	145848	48417	72254.9	112317	89112.9
Q63886	419612	340356	248958	655779	541439	618530	490543	730931	525217	780119	466042	830671	714829	291236	397843	467433	818941	648132	516283	367099	670936	318579
Q63918	74869.5	70148	84337.9	47093.9	64655.1	75099.5	49513.1	48340.5	68190.4	64103.1	136775	88901.3	105961	102100	76644.7	90137.6	57730	58701.3	67252.9	96488	97098.4	38861.1
Q63932	52666.1	46813.8	40298.5	33521.2	43176.7	41517	47675.1	39081.8	51615.3	50531.6	43936.2	40937.4	52026.8	39288.5	47529.8	38435.7	40172.4	45777	64302	57785.9	61384	44053.4
Q63961	86940.8	100733	121281	130298	119377	88907.5	94602.9	79585.7	112918	97662.2	75681	91464.4	77406.3	107616	142175	72990.6	126080	121936	61462.6	107869	83591.5	131813
Q63ZW7	28392.5	14653.3	12164.2	8894.33	8861.68	5108.81	19393.5	9657.59	26366.5	21579.9	7244.47	15539.7	16627.1	10016.9	14152.9	8550.92	14102.3	13308.7	19918.5	7586.54	23045.3	15109.1
[truncated: 3,166 more rows]

## Sheet: candidates table
comparison	gene name	protein name	UniProt ID	protein description	average log2 ratio	p-value	q-value	Ratio	number of unique total peptides
old / young	A1bg	A1BG_MOUSE	Q19LI2	Alpha-1B-glycoprotein	1.59702	4.82404e-29	4.22992e-27	3.02518	26
CR / old	A1bg	A1BG_MOUSE	Q19LI2	Alpha-1B-glycoprotein	-0.537729	1.12901e-16	3.23602e-15	0.688854	26
CR+RF / CR	A1bg	A1BG_MOUSE	Q19LI2	Alpha-1B-glycoprotein	0.477081	1.03493e-21	4.85687e-20	1.39192	26
old / young	A1cf	A1CF_MOUSE	Q5YD48	APOBEC1 complementation factor	0.107771	0.00307449	0.00785298	1.07756	23
CR / old	A1cf	A1CF_MOUSE	Q5YD48	APOBEC1 complementation factor	-0.0337649	0.00590922	0.0134285	0.976868	23
CR+RF / CR	A1cf	A1CF_MOUSE	Q5YD48	APOBEC1 complementation factor	-0.025246	0.0245132	0.0413141	0.982653	23
CR / old	A2m	A2M_MOUSE	Q61838	Alpha-2-macroglobulin	0.785573	1.97095e-20	8.00879e-19	1.72378	48
CR+RF / old	A2m	A2M_MOUSE	Q61838	Alpha-2-macroglobulin	-0.198128	9.386e-05	0.000401288	0.871681	48
CR+RF / CR	A2m	A2M_MOUSE	Q61838	Alpha-2-macroglobulin	-0.983701	1.06085e-46	2.61834e-44	0.505681	48
old / young	Aacs	AACS_MOUSE	Q9D2R0	Acetoacetyl-CoA synthetase	-0.127133	0.00159698	0.00457044	0.915649	20
CR / old	Aacs	AACS_MOUSE	Q9D2R0	Acetoacetyl-CoA synthetase	-0.891696	2.0832e-10	2.71938e-09	0.53898	20
CR+RF / old	Aacs	AACS_MOUSE	Q9D2R0	Acetoacetyl-CoA synthetase	0.590271	1.9858e-05	0.000101251	1.50553	20
CR+RF / CR	Aacs	AACS_MOUSE	Q9D2R0	Acetoacetyl-CoA synthetase	1.48197	3.56414e-30	3.46737e-28	2.79329	20
old / young	Aadac	AAAD_MOUSE	Q99PG0	Arylacetamide deacetylase	-0.366697	0.0004861	0.00168629	0.775556	17
old / young	Aadat	AADAT_MOUSE	Q9WVM8	Kynurenine/alpha-aminoadipate aminotransferase, mitochondrial	-0.396414	3.23438e-06	1.97561e-05	0.759744	24
CR / old	Aadat	AADAT_MOUSE	Q9WVM8	Kynurenine/alpha-aminoadipate aminotransferase, mitochondrial	0.24835	7.07757e-07	5.02557e-06	1.18785	24
CR+RF / CR	Aadat	AADAT_MOUSE	Q9WVM8	Kynurenine/alpha-aminoadipate aminotransferase, mitochondrial	-0.266452	6.47281e-14	1.33751e-12	0.831361	24
CR / old	Aamdc	AAMDC_MOUSE	Q8R0P4	Mth938 domain-containing protein	-0.390882	0.0022612	0.00611303	0.762663	4
CR+RF / CR	Aamdc	AAMDC_MOUSE	Q8R0P4	Mth938 domain-containing protein	0.467041	0.0290215	0.0472339	1.38227	4
CR / old	Aarsd1	AASD1_MOUSE	Q3THG9	Alanyl-tRNA editing protein Aarsd1	-0.136644	0.00685163	0.0150806	0.909633	16
CR+RF / old	Aarsd1	AASD1_MOUSE	Q3THG9	Alanyl-tRNA editing protein Aarsd1	0.638006	7.51304e-05	0.000329496	1.55618	16
CR+RF / CR	Aarsd1	AASD1_MOUSE	Q3THG9	Alanyl-tRNA editing protein Aarsd1	0.77465	1.14571e-10	1.55026e-09	1.71077	16
CR / old	Aass	AASS_MOUSE	Q99K67	Alpha-aminoadipic semialdehyde synthase, mitochondrial	0.541929	1.8907e-38	2.86355e-36	1.45592	54
CR+RF / old	Aass	AASS_MOUSE	Q99K67	Alpha-aminoadipic semialdehyde synthase, mitochondrial	-0.064486	3.14788e-07	2.39313e-06	0.956286	54
CR+RF / CR	Aass	AASS_MOUSE	Q99K67	Alpha-aminoadipic semialdehyde synthase, mitochondrial	-0.606415	1.34327e-44	2.98386e-42	0.656827	54
old / young	Abat	GABT_MOUSE	P61922	4-aminobutyrate aminotransferase, mitochondrial	-0.0961924	0.000364782	0.00131864	0.935499	37
CR / old	Abat	GABT_MOUSE	P61922	4-aminobutyrate aminotransferase, mitochondrial	0.346027	1.99227e-15	4.94468e-14	1.27106	37
CR+RF / CR	Abat	GABT_MOUSE	P61922	4-aminobutyrate aminotransferase, mitochondrial	-0.453319	7.75916e-25	4.83243e-23	0.730361	37
CR / old	Abca6	ABCA6_MOUSE	Q8K441	ATP-binding cassette sub-family A member 6	0.153864	0.011192	0.0222471	1.11255	30
CR+RF / old	Abca6	ABCA6_MOUSE	Q8K441	ATP-binding cassette sub-family A member 6	-0.400176	1.13952e-06	7.73294e-06	0.757766	30
CR+RF / CR	Abca6	ABCA6_MOUSE	Q8K441	ATP-binding cassette sub-family A member 6	-0.55404	1.58741e-19	5.94772e-18	0.68111	30
old / young	Abca8b	ABC8B_MOUSE	Q8K440	ATP-binding cassette sub-family A member 8-B	-0.163745	0.0051368	0.0120048	0.892705	6
old / young	Abcb10	ABCBA_MOUSE	Q9JI39	ATP-binding cassette sub-family B member 10, mitochondrial	-0.354503	0.0137995	0.0262118	0.782139	5
old / young	Abcb11	ABCBB_MOUSE	Q9QY30	Bile salt export pump	-0.340777	1.93413e-05	9.88425e-05	0.789616	39
CR / old	Abcb11	ABCBB_MOUSE	Q9QY30	Bile salt export pump	0.320323	0.00761443	0.0164162	1.24861	39
CR+RF / CR	Abcb11	ABCBB_MOUSE	Q9QY30	Bile salt export pump	-0.411246	3.38476e-09	3.70988e-08	0.751973	39
old / young	Abcb6	ABCB6_MOUSE	Q9DC29	ATP-binding cassette sub-family B member 6, mitochondrial	-0.75966	0.0112527	0.0223444	0.590636	2
old / young	Abcb7	ABCB7_MOUSE	Q61102	ATP-binding cassette sub-family B member 7, mitochondrial	-0.303471	0.00060204	0.00202371	0.8103	13
CR / old	Abcb7	ABCB7_MOUSE	Q61102	ATP-binding cassette sub-family B member 7, mitochondrial	0.228398	0.0234696	0.0398834	1.17153	13
CR+RF / old	Abcb7	ABCB7_MOUSE	Q61102	ATP-binding cassette sub-family B member 7, mitochondrial	0.261808	0.0258874	0.0431392	1.19898	13
old / young	Abcc2	MRP2_MOUSE	Q8VI47	Canalicular multispecific organic anion transporter 1	-0.301826	9.44032e-10	1.13454e-08	0.811225	29
CR / old	Abcc2	MRP2_MOUSE	Q8VI47	Canalicular multispecific organic anion transporter 1	0.712756	8.08499e-17	2.33746e-15	1.63893	29
CR+RF / CR	Abcc2	MRP2_MOUSE	Q8VI47	Canalicular multispecific organic anion transporter 1	-0.474922	2.0308e-12	3.42614e-11	0.719506	29
CR / old	Abcc3	MRP3_MOUSE	B2RX12	Canalicular multispecific organic anion transporter 2	0.528901	0.00425251	0.0102975	1.44283	10
CR+RF / CR	Abcc3	MRP3_MOUSE	B2RX12	Canalicular multispecific organic anion transporter 2	-0.564347	0.000138835	0.000567606	0.676261	10
old / young	Abcc6	MRP6_MOUSE	Q9R1S7	Multidrug resistance-associated protein 6	-0.265872	0.0056932	0.0130287	0.831696	12
CR / old	Abcc6	MRP6_MOUSE	Q9R1S7	Multidrug resistance-associated protein 6	-0.158507	0.00205637	0.00565449	0.895952	12
old / young	Abcd1	ABCD1_MOUSE	P48410	ATP-binding cassette sub-family D member 1	0.560253	0.000505527	0.00174687	1.47453	9
CR / old	Abcd1	ABCD1_MOUSE	P48410	ATP-binding cassette sub-family D member 1	-0.753323	0.00479484	0.0113408	0.593236	9
CR+RF / CR	Abcd1	ABCD1_MOUSE	P48410	ATP-binding cassette sub-family D member 1	0.945333	0.00105823	0.00325128	1.92563	9
old / young	Abcd2	ABCD2_MOUSE	Q61285	ATP-binding cassette sub-family D member 2	0.44215	0.00074423	0.00242225	1.35863	13
CR / old	Abcd2	ABCD2_MOUSE	Q61285	ATP-binding cassette sub-family D member 2	-0.252263	1.65244e-05	8.62325e-05	0.839579	13
CR / old	Abcd3	ABCD3_MOUSE	P55096	ATP-binding cassette sub-family D member 3	-0.257068	1.06983e-07	8.95643e-07	0.836787	25
CR+RF / CR	Abcd3	ABCD3_MOUSE	P55096	ATP-binding cassette sub-family D member 3	0.284332	7.38687e-06	4.18056e-05	1.21785	25
old / young	Abcf1	ABCF1_MOUSE	Q6P542	ATP-binding cassette sub-family F member 1	-0.165873	0.00266021	0.00697253	0.891389	15
CR / old	Abcg2	ABCG2_MOUSE	Q7TMS5	ATP-binding cassette sub-family G member 2	0.267885	0.000266399	0.00100185	1.20404	5
CR+RF / old	Abhd5	ABHD5_MOUSE	Q9DBL9	1-acylglycerol-3-phosphate O-acyltransferase ABHD5	0.599202	0.0157103	0.0290735	1.51488	2
CR+RF / CR	Abhd5	ABHD5_MOUSE	Q9DBL9	1-acylglycerol-3-phosphate O-acyltransferase ABHD5	0.887791	0.00299264	0.00767183	1.85034	2
old / young	Abhd6	ABHD6_MOUSE	Q8R2Y0	Monoacylglycerol lipase ABHD6	-0.186162	0.00361461	0.00898118	0.878941	9
CR+RF / CR	Abhd6	ABHD6_MOUSE	Q8R2Y0	Monoacylglycerol lipase ABHD6	0.244939	0.023118	0.0394515	1.18504	9
CR+RF / CR	Abi3	ABI3_MOUSE	Q8BYZ1	ABI gene family member 3	0.514234	0.0127438	0.0246286	1.42824	2
old / young	Ablim1	ABLM1_MOUSE	Q8K4G5	Actin-binding LIM protein 1	0.489218	0.0251247	0.0421581	1.40368	7
old / young	Abracl	ABRAL_MOUSE	Q4KML4	Costars family protein ABRACL	0.516401	0.000224494	0.000863759	1.43038	3
old / young	Acaa1a	THIKA_MOUSE	Q921H8	3-ketoacyl-CoA thiolase A, peroxisomal	-0.129359	0.0137992	0.0262118	0.914237	25
CR+RF / old	Acaa1a	THIKA_MOUSE	Q921H8	3-ketoacyl-CoA thiolase A, peroxisomal	0.444558	3.0318e-09	3.35551e-08	1.3609	25
CR+RF / CR	Acaa1a	THIKA_MOUSE	Q921H8	3-ketoacyl-CoA thiolase A, peroxisomal	0.385749	2.93346e-19	1.07674e-17	1.30654	25
CR+RF / old	Acaa1b	THIKB_MOUSE	Q8VCH0	3-ketoacyl-CoA thiolase B, peroxisomal	0.0782741	4.65465e-05	0.000217605	1.05575	10
CR+RF / CR	Acaa1b	THIKB_MOUSE	Q8VCH0	3-ketoacyl-CoA thiolase B, peroxisomal	0.310685	6.3205e-17	1.84736e-15	1.2403	10
old / young	Acaa2	THIM_MOUSE	Q8BWT1	3-ketoacyl-CoA thiolase, mitochondrial	0.596753	0.000973935	0.00303711	1.51231	41
CR / old	Acaa2	THIM_MOUSE	Q8BWT1	3-ketoacyl-CoA thiolase, mitochondrial	-0.159302	0.000221185	0.000852258	0.895458	41
CR+RF / CR	Acaa2	THIM_MOUSE	Q8BWT1	3-ketoacyl-CoA thiolase, mitochondrial	-0.276344	1.67181e-08	1.63357e-07	0.825681	41
CR / old	Acaca	ACACA_MOUSE	Q5SWU9	Acetyl-CoA carboxylase 1	-0.297105	6.97599e-10	8.5587e-09	0.813884	88
CR+RF / old	Acaca	ACACA_MOUSE	Q5SWU9	Acetyl-CoA carboxylase 1	0.820412	4.7439e-54	2.10756e-51	1.76591	88
CR+RF / CR	Acaca	ACACA_MOUSE	Q5SWU9	Acetyl-CoA carboxylase 1	1.11752	3.61171e-154	1.60456e-150	2.16973	88
old / young	Acacb	ACACB_MOUSE	E9Q4Z2	Acetyl-CoA carboxylase 2	-0.229371	0.000616074	0.002061	0.853007	52
CR / old	Acacb	ACACB_MOUSE	E9Q4Z2	Acetyl-CoA carboxylase 2	-0.261656	2.63103e-14	5.65587e-13	0.83413	52
CR+RF / old	Acacb	ACACB_MOUSE	E9Q4Z2	Acetyl-CoA carboxylase 2	1.01922	2.88637e-27	2.22367e-25	2.02683	52
CR+RF / CR	Acacb	ACACB_MOUSE	E9Q4Z2	Acetyl-CoA carboxylase 2	1.28088	1.94209e-59	1.23258e-56	2.42987	52
old / young	Acad10	ACD10_MOUSE	Q8K370	Acyl-CoA dehydrogenase family member 10	-0.086692	8.18834e-05	0.000355718	0.941679	43
CR / old	Acad10	ACD10_MOUSE	Q8K370	Acyl-CoA dehydrogenase family member 10	0.491181	5.24087e-09	5.58356e-08	1.4056	43
CR+RF / CR	Acad10	ACD10_MOUSE	Q8K370	Acyl-CoA dehydrogenase family member 10	-0.372465	1.86123e-12	3.16814e-11	0.772461	43
CR / old	Acad11	ACD11_MOUSE	Q80XL6	Acyl-CoA dehydrogenase family member 11	-0.472173	0.000597515	0.00201357	0.720878	30
CR+RF / CR	Acad11	ACD11_MOUSE	Q80XL6	Acyl-CoA dehydrogenase family member 11	0.388836	0.00226694	0.00612461	1.30934	30
CR / old	Acad8	ACAD8_MOUSE	Q9D7B6	Isobutyryl-CoA dehydrogenase, mitochondrial	0.55137	0.0299992	0.0483879	1.46548	15
CR+RF / CR	Acad8	ACAD8_MOUSE	Q9D7B6	Isobutyryl-CoA dehydrogenase, mitochondrial	-0.421165	4.27317e-05	0.000201746	0.746821	15
CR+RF / old	Acad9	ACAD9_MOUSE	Q8JZN5	Acyl-CoA dehydrogenase family member 9, mitochondrial	-0.414613	0.00706182	0.0154523	0.750221	29
CR+RF / CR	Acad9	ACAD9_MOUSE	Q8JZN5	Acyl-CoA dehydrogenase family member 9, mitochondrial	-0.0255793	0.00249986	0.00662437	0.982426	29
CR / old	Acadl	ACADL_MOUSE	P51174	Long-chain specific acyl-CoA dehydrogenase, mitochondrial	0.619662	4.01488e-05	0.000190768	1.53652	21
CR+RF / CR	Acadl	ACADL_MOUSE	P51174	Long-chain specific acyl-CoA dehydrogenase, mitochondrial	-0.115793	0.000786074	0.00253953	0.922875	21
CR / old	Acadm	ACADM_MOUSE	P45952	Medium-chain specific acyl-CoA dehydrogenase, mitochondrial	0.50062	2.63313e-07	2.03564e-06	1.41482	23
CR+RF / CR	Acadm	ACADM_MOUSE	P45952	Medium-chain specific acyl-CoA dehydrogenase, mitochondrial	-0.589612	4.94479e-17	1.47437e-15	0.664522	23
old / young	Acads	ACADS_MOUSE	Q07417	Short-chain specific acyl-CoA dehydrogenase, mitochondrial	-0.119492	0.000545641	0.00186561	0.920512	21
CR / old	Acads	ACADS_MOUSE	Q07417	Short-chain specific acyl-CoA dehydrogenase, mitochondrial	0.174344	3.42176e-05	0.000165536	1.12845	21
CR+RF / CR	Acads	ACADS_MOUSE	Q07417	Short-chain specific acyl-CoA dehydrogenase, mitochondrial	-0.269021	4.21908e-14	8.88339e-13	0.829883	21
old / young	Acadsb	ACDSB_MOUSE	Q9DBL1	Short/branched chain specific acyl-CoA dehydrogenase, mitochondrial	-0.351058	9.59547e-07	6.61264e-06	0.784009	13
CR+RF / CR	Acadsb	ACDSB_MOUSE	Q9DBL1	Short/branched chain specific acyl-CoA dehydrogenase, mitochondrial	-0.307412	0.00780126	0.0167405	0.80809	13
CR / old	Acadvl	ACADV_MOUSE	P50544	Very long-chain specific acyl-CoA dehydrogenase, mitochondrial	0.545207	7.02715e-23	3.56113e-21	1.45923	40
CR+RF / CR	Acadvl	ACADV_MOUSE	P50544	Very long-chain specific acyl-CoA dehydrogenase, mitochondrial	-0.566602	1.81511e-47	4.9371e-45	0.675205	40
CR+RF / CR	Acat1	THIL_MOUSE	Q8QZT1	Acetyl-CoA acetyltransferase, mitochondrial	-0.223938	4.97981e-12	7.9013e-11	0.856225	25
CR+RF / CR	Acbd3	GCP60_MOUSE	Q8BMP6	Golgi resident protein GCP60	0.258255	2.81607e-05	0.000138497	1.19603	11
CR / old	Acbd5	ACBD5_MOUSE	Q5XG73	Acyl-CoA-binding domain-containing protein 5	0.399954	0.00668992	0.0147978	1.31947	18
CR+RF / old	Acbd5	ACBD5_MOUSE	Q5XG73	Acyl-CoA-binding domain-containing protein 5	0.608124	2.27083e-06	1.44053e-05	1.52428	18
CR+RF / CR	Acbd5	ACBD5_MOUSE	Q5XG73	Acyl-CoA-binding domain-containing protein 5	0.20817	9.48334e-08	8.0557e-07	1.15522	18
CR+RF / CR	Acbd6	ACBD6_MOUSE	Q9D061	Acyl-CoA-binding domain-containing protein 6	0.319669	0.0207753	0.0363282	1.24804	3
old / young	Acly	ACLY_MOUSE	Q91V92	ATP-citrate synthase	0.0685307	0.00206105	0.00566503	1.04865	59
CR / old	Acly	ACLY_MOUSE	Q91V92	ATP-citrate synthase	-0.638199	1.60935e-23	8.64894e-22	0.642514	59
CR+RF / old	Acly	ACLY_MOUSE	Q91V92	ATP-citrate synthase	0.523911	6.75837e-35	8.57863e-33	1.43785	59
CR+RF / CR	Acly	ACLY_MOUSE	Q91V92	ATP-citrate synthase	1.16211	7.44009e-148	2.47904e-144	2.23785	59
old / young	Acnat1	ACNT1_MOUSE	A2AKK5	Acyl-coenzyme A amino acid N-acyltransferase 1	-0.193324	0.00110882	0.00337637	0.874588	9
CR / old	Acnat1	ACNT1_MOUSE	A2AKK5	Acyl-coenzyme A amino acid N-acyltransferase 1	-0.626478	0.00344289	0.00861888	0.647756	9
CR / old	Acnat2	ACNT2_MOUSE	Q8BGG9	Acyl-coenzyme A amino acid N-acyltransferase 2	-0.695173	0.00811252	0.0172584	0.617635	4
CR+RF / CR	Acnat2	ACNT2_MOUSE	Q8BGG9	Acyl-coenzyme A amino acid N-acyltransferase 2	0.611118	0.00273114	0.00712759	1.52744	4
old / young	Aco1	ACOC_MOUSE	P28271	Cytoplasmic aconitate hydratase	0.0466713	2.86524e-05	0.000140759	1.03288	50
CR / old	Aco1	ACOC_MOUSE	P28271	Cytoplasmic aconitate hydratase	-0.306752	3.92498e-06	2.35535e-05	0.80846	50
CR+RF / old	Aco1	ACOC_MOUSE	P28271	Cytoplasmic aconitate hydratase	-0.241632	1.09852e-05	5.97593e-05	0.845788	50
old / young	Aco2	ACON_MOUSE	Q99KI0	Aconitate hydratase, mitochondrial	0.299528	0.03051	0.0490397	1.23074	49
CR / old	Aco2	ACON_MOUSE	Q99KI0	Aconitate hydratase, mitochondrial	0.419298	7.71508e-20	3.01544e-18	1.33728	49
CR+RF / CR	Aco2	ACON_MOUSE	Q99KI0	Aconitate hydratase, mitochondrial	-0.658927	6.56486e-47	1.65088e-44	0.633349	49
old / young	Acot1	ACOT1_MOUSE	O55137	Acyl-coenzyme A thioesterase 1	-0.432809	1.66129e-05	8.66261e-05	0.740818	5
CR / old	Acot1	ACOT1_MOUSE	O55137	Acyl-coenzyme A thioesterase 1	0.451992	3.99641e-06	2.39389e-05	1.36793	5
CR / old	Acot11	ACO11_MOUSE	Q8VHQ9	Acyl-coenzyme A thioesterase 11	-0.486538	0.000444095	0.00155679	0.713736	5
old / young	Acot12	ACO12_MOUSE	Q9DBK0	Acyl-coenzyme A thioesterase 12	0.0172258	0.0105229	0.0211966	1.01201	17
CR+RF / CR	Acot12	ACO12_MOUSE	Q9DBK0	Acyl-coenzyme A thioesterase 12	-0.178636	0.00648002	0.0144207	0.883538	17
CR / old	Acot13	ACO13_MOUSE	Q9CQR4	Acyl-coenzyme A thioesterase 13	0.348359	1.31508e-05	7.02217e-05	1.27311	7
CR+RF / old	Acot13	ACO13_MOUSE	Q9CQR4	Acyl-coenzyme A thioesterase 13	-0.0177724	0.0294567	0.0477265	0.987757	7
CR+RF / CR	Acot13	ACO13_MOUSE	Q9CQR4	Acyl-coenzyme A thioesterase 13	-0.366131	6.66543e-07	4.75826e-06	0.77586	7
CR / old	Acot2	ACOT2_MOUSE	Q9QYR9	Acyl-coenzyme A thioesterase 2, mitochondrial	0.48294	5.05694e-09	5.39191e-08	1.39759	14
CR+RF / old	Acot2	ACOT2_MOUSE	Q9QYR9	Acyl-coenzyme A thioesterase 2, mitochondrial	0.179791	0.0015958	0.00456805	1.13272	14
old / young	Acot3	ACOT3_MOUSE	Q9QYR7	Acyl-coenzyme A thioesterase 3	0.792569	6.44455e-14	1.33374e-12	1.73216	15
CR / old	Acot3	ACOT3_MOUSE	Q9QYR7	Acyl-coenzyme A thioesterase 3	-0.262498	0.000199283	0.000779583	0.833643	15
CR+RF / old	Acot3	ACOT3_MOUSE	Q9QYR7	Acyl-coenzyme A thioesterase 3	-0.437667	0.0029229	0.00752599	0.738328	15
CR+RF / CR	Acot7	BACH_MOUSE	Q91V12	Cytosolic acyl coenzyme A thioester hydrolase	-0.521492	0.0079558	0.0169982	0.696651	4
old / young	Acot8	ACOT8_MOUSE	P58137	Acyl-coenzyme A thioesterase 8	-0.259637	0.0124413	0.0241996	0.835298	5
CR / old	Acot8	ACOT8_MOUSE	P58137	Acyl-coenzyme A thioesterase 8	-0.489558	0.0229449	0.0392014	0.712243	5
CR / old	Acox1	ACOX1_MOUSE	Q9R0H0	Peroxisomal acyl-coenzyme A oxidase 1	0.0752731	7.13708e-08	6.18083e-07	1.05356	48
old / young	Acox2	ACOX2_MOUSE	Q9QXD1	Peroxisomal acyl-coenzyme A oxidase 2	0.434825	0.00376362	0.00928918	1.35175	31
CR+RF / old	Acox2	ACOX2_MOUSE	Q9QXD1	Peroxisomal acyl-coenzyme A oxidase 2	0.102464	0.000163265	0.000654633	1.07361	31
CR+RF / CR	Acox2	ACOX2_MOUSE	Q9QXD1	Peroxisomal acyl-coenzyme A oxidase 2	0.0746618	0.0200899	0.0353851	1.05311	31
CR / old	Acox3	ACOX3_MOUSE	Q9EPL9	Peroxisomal acyl-coenzyme A oxidase 3	-0.137724	0.00247911	0.00657938	0.908952	5
CR+RF / CR	Acp1	PPAC_MOUSE	Q9D358	Low molecular weight phosphotyrosine protein phosphatase	0.370741	0.00361592	0.00898118	1.29302	8
CR+RF / CR	Acp5	PPA5_MOUSE	Q05117	Tartrate-resistant acid phosphatase type 5	-0.179606	3.96612e-05	0.00018899	0.882944	7
CR / old	Acp6	PPA6_MOUSE	Q8BP40	Lysophosphatidic acid phosphatase type 6	0.71347	0.000126046	0.000519624	1.63974	12
CR+RF / old	Acp6	PPA6_MOUSE	Q8BP40	Lysophosphatidic acid phosphatase type 6	0.186114	0.0262813	0.043681	1.1377	12
CR+RF / CR	Acp6	PPA6_MOUSE	Q8BP40	Lysophosphatidic acid phosphatase type 6	-0.527356	9.61853e-09	9.72835e-08	0.693825	12
CR+RF / old	Acpp	PPAP_MOUSE	Q8CE08	Prostatic acid phosphatase	0.767362	0.00977813	0.0200194	1.70215	7
CR / old	Acsf2	ACSF2_MOUSE	Q8VCW8	Acyl-CoA synthetase family member 2, mitochondrial	-0.499862	6.83555e-11	9.43107e-10	0.707174	29
CR+RF / old	Acsf2	ACSF2_MOUSE	Q8VCW8	Acyl-CoA synthetase family member 2, mitochondrial	-0.529523	3.84858e-09	4.17362e-08	0.692784	29
old / young	Acsf3	ACSF3_MOUSE	Q3URE1	Acyl-CoA synthetase family member 3, mitochondrial	-0.413642	3.04325e-05	0.000148519	0.750726	14
CR / old	Acsl1	ACSL1_MOUSE	P41216	Long-chain-fatty-acid--CoA ligase 1	-0.122395	0.00461257	0.0110074	0.918661	38
CR+RF / CR	Acsl3	ACSL3_MOUSE	Q9CZW4	Long-chain-fatty-acid--CoA ligase 3	0.136291	0.00685797	0.015088	1.09908	7
CR+RF / old	Acsl4	ACSL4_MOUSE	Q9QUJ7	Long-chain-fatty-acid--CoA ligase 4	0.895766	0.00149754	0.00433518	1.8606	11
CR / old	Acsl5	ACSL5_MOUSE	Q8JZR0	Long-chain-fatty-acid--CoA ligase 5	0.00912719	0.0146292	0.0275003	1.00635	34
CR+RF / old	Acsl5	ACSL5_MOUSE	Q8JZR0	Long-chain-fatty-acid--CoA ligase 5	0.526862	7.52078e-15	1.72525e-13	1.44079	34
CR+RF / CR	Acsl5	ACSL5_MOUSE	Q8JZR0	Long-chain-fatty-acid--CoA ligase 5	0.517735	3.60078e-33	4.06705e-31	1.43171	34
CR / old	Acsm1	ACSM1_MOUSE	Q91VA0	Acyl-coenzyme A synthetase ACSM1, mitochondrial	0.323631	0.0115875	0.0228662	1.25148	28
CR+RF / old	Acsm1	ACSM1_MOUSE	Q91VA0	Acyl-coenzyme A synthetase ACSM1, mitochondrial	-0.0983525	1.3119e-09	1.53782e-08	0.934099	28
CR+RF / CR	Acsm1	ACSM1_MOUSE	Q91VA0	Acyl-coenzyme A synthetase ACSM1, mitochondrial	-0.421984	0.0236812	0.0401329	0.746398	28
CR / old	Acsm3	ACSM3_MOUSE	Q3UNX5	Acyl-coenzyme A synthetase ACSM3, mitochondrial	0.442357	1.01234e-06	6.9477e-06	1.35882	25
CR+RF / CR	Acsm3	ACSM3_MOUSE	Q3UNX5	Acyl-coenzyme A synthetase ACSM3, mitochondrial	-0.436784	1.12721e-08	1.12873e-07	0.738779	25
old / young	Acsm5	ACSM5_MOUSE	Q8BGA8	Acyl-coenzyme A synthetase ACSM5, mitochondrial	-0.180605	2.06091e-05	0.000104639	0.882333	22
CR+RF / old	Acsm5	ACSM5_MOUSE	Q8BGA8	Acyl-coenzyme A synthetase ACSM5, mitochondrial	-0.307533	6.15304e-05	0.000277334	0.808022	22
CR+RF / CR	Acsm5	ACSM5_MOUSE	Q8BGA8	Acyl-coenzyme A synthetase ACSM5, mitochondrial	-0.277051	3.04321e-08	2.83636e-07	0.825276	22
old / young	Acss2	ACSA_MOUSE	Q9QXG4	Acetyl-coenzyme A synthetase, cytoplasmic	0.0189745	0.0274316	0.0451871	1.01324	29
CR / old	Acss2	ACSA_MOUSE	Q9QXG4	Acetyl-coenzyme A synthetase, cytoplasmic	-0.172752	0.00223255	0.00605031	0.887149	29
CR+RF / old	Acss2	ACSA_MOUSE	Q9QXG4	Acetyl-coenzyme A synthetase, cytoplasmic	1.1286	1.58672e-35	2.05319e-33	2.18646	29
CR+RF / CR	Acss2	ACSA_MOUSE	Q9QXG4	Acetyl-coenzyme A synthetase, cytoplasmic	1.30135	2.47408e-76	2.99768e-73	2.46459	29
CR / old	Acss3	ACSS3_MOUSE	Q14DH7	Acyl-CoA synthetase short-chain family member 3, mitochondrial	-0.556404	1.38732e-14	3.08685e-13	0.679995	27
CR+RF / old	Acss3	ACSS3_MOUSE	Q14DH7	Acyl-CoA synthetase short-chain family member 3, mitochondrial	-0.3921	0.000676694	0.00223353	0.76202	27
CR / old	Actbl2	ACTBL_MOUSE	Q8BFZ3	Beta-actin-like protein 2	1.93421	0.0227755	0.0389885	3.82169	2
old / young	Actg1	ACTG_MOUSE	P63260	Actin, cytoplasmic 2	1.84876	0.00336215	0.00845166	3.6019	2
CR+RF / CR	Actn1	ACTN1_MOUSE	Q7TPR4	Alpha-actinin-1	0.085523	0.0148625	0.0278605	1.06107	39
old / young	Actn4	ACTN4_MOUSE	P57780	Alpha-actinin-4	0.35504	8.63263e-06	4.83021e-05	1.27902	36
CR / old	Actn4	ACTN4_MOUSE	P57780	Alpha-actinin-4	0.225621	7.6086e-07	5.36263e-06	1.16928	36
CR+RF / old	Actn4	ACTN4_MOUSE	P57780	Alpha-actinin-4	0.354272	5.0119e-06	2.93878e-05	1.27834	36
CR+RF / CR	Actr10	ARP10_MOUSE	Q9QZB7	Actin-related protein 10	0.32448	0.0196143	0.0347221	1.25221	4
CR+RF / old	Actr2	ARP2_MOUSE	P61161	Actin-related protein 2	-0.743205	0.00231812	0.00623027	0.597411	12
CR+RF / CR	Actr2	ARP2_MOUSE	P61161	Actin-related protein 2	-0.400748	3.28615e-08	3.04151e-07	0.757465	12
CR+RF / CR	Actr3	ARP3_MOUSE	Q99JY9	Actin-related protein 3	-0.286195	6.03328e-07	4.33019e-06	0.820062	24
CR+RF / CR	Acy1	ACY1_MOUSE	Q99JW2	Aminoacylase-1	0.347102	0.00320268	0.00811662	1.272	19
old / young	Acy3	ACY3_MOUSE	Q91XE4	N-acyl-aromatic-L-amino acid amidohydrolase (carboxylate-forming)	-0.238553	0.00504746	0.0118375	0.847595	10
CR / old	Acy3	ACY3_MOUSE	Q91XE4	N-acyl-aromatic-L-amino acid amidohydrolase (carboxylate-forming)	-0.654439	7.37492e-15	1.69471e-13	0.635323	10
CR+RF / old	Acy3	ACY3_MOUSE	Q91XE4	N-acyl-aromatic-L-amino acid amidohydrolase (carboxylate-forming)	-0.832178	2.06413e-12	3.47798e-11	0.561681	10
CR+RF / CR	Acy3	ACY3_MOUSE	Q91XE4	N-acyl-aromatic-L-amino acid amidohydrolase (carboxylate-forming)	-0.177739	0.017422	0.0315447	0.884087	10
CR / old	Acyp1	ACYP1_MOUSE	P56376	Acylphosphatase-1	-0.248337	5.3904e-06	3.1455e-05	0.841866	7
CR+RF / CR	Acyp1	ACYP1_MOUSE	P56376	Acylphosphatase-1	0.142692	0.0170582	0.0310294	1.10396	7
old / young	Ada	ADA_MOUSE	P03958	Adenosine deaminase	0.206513	0.0143924	0.0271164	1.1539	10
CR / old	Adam10	ADA10_MOUSE	O35598	Disintegrin and metalloproteinase domain-containing protein 10	-3.07401	0.0251943	0.0422324	0.118749	4
old / young	Adam9	ADAM9_MOUSE	Q61072	Disintegrin and metalloproteinase domain-containing protein 9	-0.827907	0.00765145	0.0164828	0.563346	3
CR / old	Adck3	ADCK3_MOUSE	Q60936	Atypical kinase ADCK3, mitochondrial	-0.313748	8.2809e-08	7.09305e-07	0.804549	23
CR+RF / old	Adck3	ADCK3_MOUSE	Q60936	Atypical kinase ADCK3, mitochondrial	-0.328044	0.00213908	0.00583257	0.796616	23
CR+RF / old	Add3	ADDG_MOUSE	Q9QYB5	Gamma-adducin	-0.237517	0.00952078	0.0196125	0.848204	7
CR / old	Adh1	ADH1_MOUSE	P00329	Alcohol dehydrogenase 1	-0.165123	0.000423159	0.00149519	0.891853	23
CR+RF / old	Adh1	ADH1_MOUSE	P00329	Alcohol dehydrogenase 1	-0.488704	0.0238848	0.0403827	0.712665	23
CR+RF / CR	Adh1	ADH1_MOUSE	P00329	Alcohol dehydrogenase 1	-0.323581	0.00342789	0.00859422	0.799084	23
old / young	Adh4	ADH4_MOUSE	Q9QYY9	Alcohol dehydrogenase 4	-1.29432	1.39201e-12	2.4032e-11	0.407728	7
CR / old	Adh4	ADH4_MOUSE	Q9QYY9	Alcohol dehydrogenase 4	1.23549	5.0859e-05	0.000234469	2.35462	7
old / young	Adh5	ADHX_MOUSE	P28474	Alcohol dehydrogenase class-3	-0.169184	0.000412533	0.00146113	0.889346	16
CR / old	Adh5	ADHX_MOUSE	P28474	Alcohol dehydrogenase class-3	0.44991	7.75808e-05	0.000338904	1.36595	16
CR+RF / CR	Adh5	ADHX_MOUSE	P28474	Alcohol dehydrogenase class-3	0.0624795	2.28485e-05	0.000114655	1.04426	16
old / young	Adi1	MTND_MOUSE	Q99JT9	1,2-dihydroxy-3-keto-5-methylthiopentene dioxygenase	0.344365	0.0129362	0.024919	1.26959	11
CR / old	Adipoq	ADIPO_MOUSE	Q60994	Adiponectin	1.74061	0.00141699	0.00414068	3.34177	3
CR / old	Adk	ADK_MOUSE	P55264	Adenosine kinase	-0.0137901	0.0233603	0.0397416	0.990487	26
CR+RF / CR	Adk	ADK_MOUSE	P55264	Adenosine kinase	-0.412188	3.60707e-09	3.9277e-08	0.751483	26
CR / old	Adpgk	ADPGK_MOUSE	Q8VDL4	ADP-dependent glucokinase	-0.621186	0.00409406	0.00997418	0.650136	7
CR+RF / CR	Adprh	ADPRH_MOUSE	P54923	[Protein ADP-ribosylarginine] hydrolase	0.153546	0.0170169	0.0309741	1.1123	5
CR+RF / old	Adsl	PUR8_MOUSE	P54822	Adenylosuccinate lyase	0.0745753	0.0267408	0.0442899	1.05305	19
old / young	Adss	PURA2_MOUSE	P46664	Adenylosuccinate synthetase isozyme 2	0.1042	0.00286153	0.00739977	1.0749	16
CR+RF / old	Adss	PURA2_MOUSE	P46664	Adenylosuccinate synthetase isozyme 2	0.0969867	0.0219178	0.0378737	1.06954	16
CR+RF / CR	Adss	PURA2_MOUSE	P46664	Adenylosuccinate synthetase isozyme 2	0.163961	0.0094759	0.0195352	1.12036	16
old / young	Adssl1	PURA1_MOUSE	P28650	Adenylosuccinate synthetase isozyme 1	0.185862	0.00147492	0.00427621	1.1375	11
CR / old	Adssl1	PURA1_MOUSE	P28650	Adenylosuccinate synthetase isozyme 1	0.854996	4.69442e-08	4.23897e-07	1.80875	11
CR+RF / CR	Adssl1	PURA1_MOUSE	P28650	Adenylosuccinate synthetase isozyme 1	-0.698451	7.56428e-07	5.3427e-06	0.616233	11
CR+RF / CR	Afg3l1	AFG31_MOUSE	Q920A7	AFG3-like protein 1	-0.204714	0.017019	0.0309741	0.867711	10
CR+RF / CR	Afg3l2	AFG32_MOUSE	Q8JZQ2	AFG3-like protein 2	-0.161268	0.0201997	0.0355407	0.894239	21
old / young	Afm	AFAM_MOUSE	O89020	Afamin	0.311978	0.0106733	0.0214271	1.24141	16
CR / old	Afm	AFAM_MOUSE	O89020	Afamin	0.166638	1.23986e-05	6.66629e-05	1.12244	16
CR+RF / CR	Afm	AFAM_MOUSE	O89020	Afamin	-0.235772	0.013292	0.0254351	0.84923	16
old / young	Afmid	KFA_MOUSE	Q8K4H1	Kynurenine formamidase	-0.199846	0.00417546	0.0101421	0.870644	12
CR / old	Afmid	KFA_MOUSE	Q8K4H1	Kynurenine formamidase	0.652924	0.00329258	0.00831283	1.57235	12
CR+RF / CR	Afmid	KFA_MOUSE	Q8K4H1	Kynurenine formamidase	-0.761613	2.0798e-06	1.32948e-05	0.589837	12
old / young	Aga	ASPG_MOUSE	Q64191	N(4)-(beta-N-acetylglucosaminyl)-L-asparaginase	0.613837	0.00113974	0.00344533	1.53032	7
CR+RF / CR	Agfg2	AGFG2_MOUSE	Q80WC7	Arf-GAP domain and FG repeat-containing protein 2	-0.254184	0.000506152	0.00174767	0.838461	5
CR / old	Agk	AGK_MOUSE	Q9ESW4	Acylglycerol kinase, mitochondrial	0.353821	0.0145242	0.0273384	1.27794	8
CR+RF / CR	Agk	AGK_MOUSE	Q9ESW4	Acylglycerol kinase, mitochondrial	-0.294545	0.00193254	0.00537491	0.815329	8
old / young	Agmat	SPEB_MOUSE	A2AS89	Agmatinase, mitochondrial	1.0648	3.87794e-08	3.54981e-07	2.09188	14
CR+RF / CR	Agmat	SPEB_MOUSE	A2AS89	Agmatinase, mitochondrial	-0.0212256	0.0178534	0.0321252	0.985395	14
CR+RF / CR	Ago2	AGO2_MOUSE	Q8CJG0	Protein argonaute-2	-1.09632	0.0300729	0.0484627	0.467709	6
old / young	Agpat3	PLCC_MOUSE	Q9D517	1-acyl-sn-glycerol-3-phosphate acyltransferase gamma	-0.337424	0.00755005	0.0162994	0.791453	4
old / young	Agt	ANGT_MOUSE	P11859	Angiotensinogen	0.201096	0.00423177	0.0102531	1.14957	8
CR / old	Agt	ANGT_MOUSE	P11859	Angiotensinogen	0.392859	4.33868e-05	0.000204404	1.31299	8
CR+RF / CR	Agt	ANGT_MOUSE	P11859	Angiotensinogen	-0.388271	4.43974e-05	0.000209017	0.764045	8
old / young	Agxt	SPYA_MOUSE	O35423	Serine--pyruvate aminotransferase, mitochondrial	0.490558	5.43221e-09	5.76896e-08	1.40499	18
CR / old	Agxt	SPYA_MOUSE	O35423	Serine--pyruvate aminotransferase, mitochondrial	-0.718044	1.47127e-13	2.90075e-12	0.607921	18
CR+RF / old	Agxt	SPYA_MOUSE	O35423	Serine--pyruvate aminotransferase, mitochondrial	-0.563202	1.22253e-06	8.23337e-06	0.676799	18
old / young	Agxt2	AGT2_MOUSE	Q3UEG6	Alanine--glyoxylate aminotransferase 2, mitochondrial	-0.354238	1.40513e-09	1.6399e-08	0.782282	23
CR / old	Agxt2	AGT2_MOUSE	Q3UEG6	Alanine--glyoxylate aminotransferase 2, mitochondrial	0.661945	1.42464e-14	3.15933e-13	1.58221	23
CR+RF / CR	Agxt2	AGT2_MOUSE	Q3UEG6	Alanine--glyoxylate aminotransferase 2, mitochondrial	-0.482221	4.49979e-15	1.06524e-13	0.715874	23
old / young	Ahctf1	ELYS_MOUSE	Q8CJF7	Protein ELYS	0.43398	0.0173334	0.0314183	1.35096	9
old / young	Ahcy	SAHH_MOUSE	P50247	Adenosylhomocysteinase	-0.124984	9.54834e-06	5.27444e-05	0.917014	34
CR / old	Ahcy	SAHH_MOUSE	P50247	Adenosylhomocysteinase	0.267493	5.70046e-05	0.000259038	1.20371	34
CR+RF / CR	Ahcy	SAHH_MOUSE	P50247	Adenosylhomocysteinase	-0.505028	3.15327e-09	3.47042e-08	0.704647	34
old / young	Ahsa1	AHSA1_MOUSE	Q8BK64	Activator of 90 kDa heat shock protein ATPase homolog 1	0.00412651	0.000196049	0.000767833	1.00286	16
CR / old	Ahsa1	AHSA1_MOUSE	Q8BK64	Activator of 90 kDa heat shock protein ATPase homolog 1	-0.506355	6.0501e-06	3.47868e-05	0.703999	16
CR+RF / CR	Ahsa1	AHSA1_MOUSE	Q8BK64	Activator of 90 kDa heat shock protein ATPase homolog 1	0.31949	0.000117839	0.000490645	1.24789	16
old / young	Ahsa2	AHSA2_MOUSE	Q8N9S3	Activator of 90 kDa heat shock protein ATPase homolog 2	-0.145879	0.0282655	0.0462805	0.903828	2
old / young	Ahsg	FETUA_MOUSE	P29699	Alpha-2-HS-glycoprotein	0.37305	0.0140785	0.0266267	1.29509	8
CR / old	Ahsg	FETUA_MOUSE	P29699	Alpha-2-HS-glycoprotein	0.293758	0.00176971	0.00498979	1.22583	8
CR+RF / CR	Ahsg	FETUA_MOUSE	P29699	Alpha-2-HS-glycoprotein	-0.198501	0.019829	0.0350227	0.871456	8
old / young	Aifm1	AIFM1_MOUSE	Q9Z0X1	Apoptosis-inducing factor 1, mitochondrial	0.230162	0.00469094	0.0111586	1.17297	26
CR / old	Aifm1	AIFM1_MOUSE	Q9Z0X1	Apoptosis-inducing factor 1, mitochondrial	0.126501	0.0179784	0.032315	1.09164	26
CR+RF / CR	Aifm1	AIFM1_MOUSE	Q9Z0X1	Apoptosis-inducing factor 1, mitochondrial	-0.330357	0.00193226	0.00537491	0.79534	26
old / young	Aifm2	AIFM2_MOUSE	Q8BUE4	Apoptosis-inducing factor 2	-0.295736	0.0105639	0.0212489	0.814657	3
CR+RF / CR	Aimp1	AIMP1_MOUSE	P31230	Aminoacyl tRNA synthase complex-interacting multifunctional protein 1	0.15673	0.0126701	0.0245197	1.11476	18
old / young	Ak3	KAD3_MOUSE	Q9WTP7	GTP:AMP phosphotransferase AK3, mitochondrial	0.532232	0.000237509	0.000905993	1.44616	18
old / young	Ak4	KAD4_MOUSE	Q9WUR9	Adenylate kinase 4, mitochondrial	0.0290802	6.97597e-06	3.96147e-05	1.02036	13
CR / old	Ak4	KAD4_MOUSE	Q9WUR9	Adenylate kinase 4, mitochondrial	0.513829	0.00105435	0.0032416	1.42784	13
CR+RF / old	Ak4	KAD4_MOUSE	Q9WUR9	Adenylate kinase 4, mitochondrial	0.679161	0.0255707	0.0427075	1.60121	13
CR+RF / CR	Akap1	AKAP1_MOUSE	O08715	A-kinase anchor protein 1, mitochondrial	0.4083	0.00776919	0.0166878	1.32712	23
CR+RF / CR	Akap12	AKA12_MOUSE	Q9WTQ5	A-kinase anchor protein 12	0.743364	0.00202721	0.0055893	1.67407	18
CR / old	Akr1a1	AK1A1_MOUSE	Q9JII6	Alcohol dehydrogenase [NADP(+)]	0.288887	0.023131	0.0394686	1.2217	19
CR+RF / CR	Akr1a1	AK1A1_MOUSE	Q9JII6	Alcohol dehydrogenase [NADP(+)]	-0.368589	1.50724e-10	2.00484e-09	0.774539	19
CR+RF / CR	Akr1b1	ALDR_MOUSE	P45376	Aldose reductase	-0.699551	0.0180618	0.0324431	0.615764	10
old / young	Akr1b7	ALD1_MOUSE	P21300	Aldose reductase-related protein 1	0.713416	0.0201588	0.035483	1.63968	15
CR / old	Akr1b7	ALD1_MOUSE	P21300	Aldose reductase-related protein 1	1.52391	2.56514e-05	0.000127473	2.87569	15
CR+RF / CR	Akr1b7	ALD1_MOUSE	P21300	Aldose reductase-related protein 1	-1.20567	3.10082e-09	3.41552e-08	0.433569	15
old / young	Akr1b8	ALD2_MOUSE	P45377	Aldose reductase-related protein 2	-0.0668029	8.23172e-05	0.000357486	0.954751	8
CR / old	Akr1b8	ALD2_MOUSE	P45377	Aldose reductase-related protein 2	0.512246	0.00331325	0.00835552	1.42627	8
CR / old	Akr1c13	AK1CD_MOUSE	Q8VC28	Aldo-keto reductase family 1 member C13	-0.268332	0.00522536	0.0121797	0.830279	19
CR+RF / old	Akr1c13	AK1CD_MOUSE	Q8VC28	Aldo-keto reductase family 1 member C13	-0.096548	0.000590525	0.00199506	0.935268	19
old / young	Akr1c6	DHB5_MOUSE	P70694	Estradiol 17 beta-dehydrogenase 5	-0.402767	0.0048095	0.0113694	0.756406	24
CR+RF / old	Akr1c6	DHB5_MOUSE	P70694	Estradiol 17 beta-dehydrogenase 5	-0.0967434	0.00644137	0.0143555	0.935141	24
CR+RF / CR	Akr1c6	DHB5_MOUSE	P70694	Estradiol 17 beta-dehydrogenase 5	0.0183277	0.000106642	0.00044879	1.01278	24
old / young	Akr1d1	AK1D1_MOUSE	Q8VCX1	3-oxo-5-beta-steroid 4-dehydrogenase	-0.117446	0.00062151	0.00207658	0.921818	22
CR+RF / CR	Akr1d1	AK1D1_MOUSE	Q8VCX1	3-oxo-5-beta-steroid 4-dehydrogenase	-0.311372	0.000163406	0.000655	0.805875	22
old / young	Akr1e2	AKCL2_MOUSE	Q9DCT1	1,5-anhydro-D-fructose reductase	0.115118	0.0303264	0.0488061	1.08306	9
CR / old	Akr1e2	AKCL2_MOUSE	Q9DCT1	1,5-anhydro-D-fructose reductase	-0.332934	0.000768757	0.00249173	0.79392	9
old / young	Akr7a2	ARK72_MOUSE	Q8CG76	Aflatoxin B1 aldehyde reductase member 2	0.436463	0.00137682	0.00403925	1.35328	15
CR+RF / CR	Akt1s1	AKTS1_MOUSE	Q9D1F4	Proline-rich AKT1 substrate 1	0.317367	0.00140063	0.00409918	1.24605	6
CR / old	Alad	HEM2_MOUSE	P10518	Delta-aminolevulinic acid dehydratase	-0.394086	0.00740247	0.0160319	0.760971	22
old / young	Alas1	HEM1_MOUSE	Q8VC19	5-aminolevulinate synthase, nonspecific, mitochondrial	-0.30385	0.0212444	0.0369352	0.810088	6
old / young	Alb	ALBU_MOUSE	P07724	Serum albumin	1.13347	1.01506e-08	1.02413e-07	2.19385	66
CR / old	Alb	ALBU_MOUSE	P07724	Serum albumin	-0.0567719	5.2872e-22	2.55318e-20	0.961413	66
CR+RF / CR	Alb	ALBU_MOUSE	P07724	Serum albumin	-0.944271	2.76873e-28	2.2501e-26	0.519692	66
old / young	Alcam	CD166_MOUSE	Q61490	CD166 antigen	0.229288	7.05669e-05	0.000312671	1.17226	21
CR+RF / old	Aldh16a1	A16A1_MOUSE	Q571I9	Aldehyde dehydrogenase family 16 member A1	-0.353706	0.00588299	0.0133803	0.782571	22
CR+RF / CR	Aldh16a1	A16A1_MOUSE	Q571I9	Aldehyde dehydrogenase family 16 member A1	-0.307352	0.000806209	0.00259607	0.808124	22
old / young	Aldh1a1	AL1A1_MOUSE	P24549	Retinal dehydrogenase 1	-0.281793	3.52245e-16	9.31492e-15	0.822568	23
CR / old	Aldh1a1	AL1A1_MOUSE	P24549	Retinal dehydrogenase 1	-0.22931	0.000435092	0.00152965	0.853043	23
CR+RF / old	Aldh1a1	AL1A1_MOUSE	P24549	Retinal dehydrogenase 1	0.363883	0.000203756	0.000796148	1.28689	23
CR+RF / CR	Aldh1a1	AL1A1_MOUSE	P24549	Retinal dehydrogenase 1	0.593193	0.00685236	0.0150806	1.50858	23
old / young	Aldh1a7	AL1A7_MOUSE	O35945	Aldehyde dehydrogenase, cytosolic 1	0.272076	0.000511622	0.00176564	1.20754	33
CR / old	Aldh1a7	AL1A7_MOUSE	O35945	Aldehyde dehydrogenase, cytosolic 1	-0.134506	0.0135445	0.0258218	0.910981	33
CR+RF / old	Aldh1a7	AL1A7_MOUSE	O35945	Aldehyde dehydrogenase, cytosolic 1	0.560621	5.7904e-07	4.17385e-06	1.4749	33
CR+RF / CR	Aldh1a7	AL1A7_MOUSE	O35945	Aldehyde dehydrogenase, cytosolic 1	0.695128	2.80103e-09	3.12665e-08	1.61903	33
old / young	Aldh1b1	AL1B1_MOUSE	Q9CZS1	Aldehyde dehydrogenase X, mitochondrial	0.566665	2.11545e-11	3.11543e-10	1.4811	41
CR+RF / CR	Aldh1l1	AL1L1_MOUSE	Q8R0Y6	Cytosolic 10-formyltetrahydrofolate dehydrogenase	-0.315825	0.0210432	0.0366571	0.803392	92
CR / old	Aldh2	ALDH2_MOUSE	P47738	Aldehyde dehydrogenase, mitochondrial	0.538536	2.02207e-08	1.94586e-07	1.4525	47
CR+RF / CR	Aldh2	ALDH2_MOUSE	P47738	Aldehyde dehydrogenase, mitochondrial	-0.584603	4.27411e-06	2.54537e-05	0.666833	47
old / young	Aldh3a2	AL3A2_MOUSE	P47740	Fatty aldehyde dehydrogenase	0.511403	5.30156e-10	6.59134e-09	1.42544	29
CR / old	Aldh3a2	AL3A2_MOUSE	P47740	Fatty aldehyde dehydrogenase	-0.241806	0.000247464	0.000939389	0.845686	29
CR+RF / old	Aldh3a2	AL3A2_MOUSE	P47740	Fatty aldehyde dehydrogenase	-0.152212	0.0280835	0.046056	0.89987	29
old / young	Aldh4a1	AL4A1_MOUSE	Q8CHT0	Delta-1-pyrroline-5-carboxylate dehydrogenase, mitochondrial	0.877933	1.41862e-06	9.40656e-06	1.83774	34
CR+RF / CR	Aldh4a1	AL4A1_MOUSE	Q8CHT0	Delta-1-pyrroline-5-carboxylate dehydrogenase, mitochondrial	0.000766552	0.00342394	0.0085908	1.00053	34
old / young	Aldh5a1	SSDH_MOUSE	Q8BWF0	Succinate-semialdehyde dehydrogenase, mitochondrial	-0.263568	0.00675242	0.0149074	0.833025	23
CR / old	Aldh5a1	SSDH_MOUSE	Q8BWF0	Succinate-semialdehyde dehydrogenase, mitochondrial	0.303551	8.83915e-07	6.14224e-06	1.23418	23
CR+RF / CR	Aldh5a1	SSDH_MOUSE	Q8BWF0	Succinate-semialdehyde dehydrogenase, mitochondrial	-0.165191	5.98527e-11	8.30954e-10	0.89181	23
old / young	Aldh6a1	MMSA_MOUSE	Q9EQ20	Methylmalonate-semialdehyde dehydrogenase [acylating], mitochondrial	0.0408535	1.99492e-05	0.000101637	1.02872	41
CR / old	Aldh6a1	MMSA_MOUSE	Q9EQ20	Methylmalonate-semialdehyde dehydrogenase [acylating], mitochondrial	0.225045	0.0111397	0.022173	1.16881	41
CR+RF / old	Aldh6a1	MMSA_MOUSE	Q9EQ20	Methylmalonate-semialdehyde dehydrogenase [acylating], mitochondrial	-0.00140483	0.000165492	0.000662764	0.999027	41
CR+RF / CR	Aldh6a1	MMSA_MOUSE	Q9EQ20	Methylmalonate-semialdehyde dehydrogenase [acylating], mitochondrial	-0.22645	3.09863e-09	3.41552e-08	0.854736	41
CR / old	Aldh7a1	AL7A1_MOUSE	Q9DBF1	Alpha-aminoadipic semialdehyde dehydrogenase	0.246586	1.03646e-06	7.10227e-06	1.1864	28
CR+RF / CR	Aldh7a1	AL7A1_MOUSE	Q9DBF1	Alpha-aminoadipic semialdehyde dehydrogenase	-0.543208	1.73971e-14	3.8199e-13	0.686243	28
old / young	Aldh8a1	AL8A1_MOUSE	Q8BH00	Aldehyde dehydrogenase family 8 member A1	0.15522	0.0278757	0.045779	1.11359	32
CR+RF / old	Aldh8a1	AL8A1_MOUSE	Q8BH00	Aldehyde dehydrogenase family 8 member A1	-0.211552	0.00837544	0.0176934	0.863608	32
CR+RF / CR	Aldh8a1	AL8A1_MOUSE	Q8BH00	Aldehyde dehydrogenase family 8 member A1	-0.222413	1.63125e-06	1.06627e-05	0.857131	32
CR / old	Aldh9a1	AL9A1_MOUSE	Q9JLJ2	4-trimethylaminobutyraldehyde dehydrogenase	-0.165235	0.000925747	0.00291411	0.891783	35
CR / old	Aldoa	ALDOA_MOUSE	P05064	Fructose-bisphosphate aldolase A	0.397256	1.2214e-05	6.57995e-05	1.317	23
CR+RF / old	Aldoa	ALDOA_MOUSE	P05064	Fructose-bisphosphate aldolase A	0.315762	0.000132784	0.00054504	1.24467	23
CR+RF / CR	Aldoa	ALDOA_MOUSE	P05064	Fructose-bisphosphate aldolase A	-0.0814932	9.48638e-05	0.00040485	0.945079	23
CR / old	Aldob	ALDOB_MOUSE	Q91Y97	Fructose-bisphosphate aldolase B	-0.667054	3.99519e-12	6.40769e-11	0.629791	42
CR+RF / CR	Aldob	ALDOB_MOUSE	Q91Y97	Fructose-bisphosphate aldolase B	0.475661	1.87127e-24	1.09387e-22	1.39055	42
CR / old	Aldoc	ALDOC_MOUSE	P05063	Fructose-bisphosphate aldolase C	1.08973	1.26777e-12	2.20011e-11	2.12834	17
CR+RF / old	Aldoc	ALDOC_MOUSE	P05063	Fructose-bisphosphate aldolase C	0.954869	0.00167118	0.00475422	1.9384	17
CR+RF / CR	Aldoc	ALDOC_MOUSE	P05063	Fructose-bisphosphate aldolase C	-0.134862	0.00422282	0.0102368	0.910757	17
CR+RF / CR	Alkbh3	ALKB3_MOUSE	Q8K1E6	Alpha-ketoglutarate-dependent dioxygenase alkB homolog 3	0.788351	0.00634338	0.014183	1.7271	3
CR / old	Alpl	PPBT_MOUSE	P09242	Alkaline phosphatase, tissue-nonspecific isozyme	0.976332	0.0195743	0.0346785	1.96746	3
CR+RF / CR	Als2	ALS2_MOUSE	Q920R0	Alsin	0.253097	0.00048999	0.0016989	1.19176	7
old / young	Ambp	AMBP_MOUSE	Q07456	Protein AMBP	0.281817	0.00535379	0.012401	1.21573	11
CR / old	Amdhd1	HUTI_MOUSE	Q9DBA8	Probable imidazolonepropionase	-0.107908	0.000722853	0.00236654	0.927932	20
CR+RF / old	Amdhd1	HUTI_MOUSE	Q9DBA8	Probable imidazolonepropionase	-0.06019	0.0018695	0.00522363	0.959138	20
CR+RF / CR	Amdhd1	HUTI_MOUSE	Q9DBA8	Probable imidazolonepropionase	0.0477184	0.0140064	0.0265184	1.03363	20
CR / old	Amfr	AMFR_MOUSE	Q9R049	E3 ubiquitin-protein ligase AMFR	-0.400695	0.0116546	0.0229659	0.757493	9
CR+RF / CR	Amfr	AMFR_MOUSE	Q9R049	E3 ubiquitin-protein ligase AMFR	0.755718	0.000607513	0.0020385	1.68847	9
CR / old	Ampd2	AMPD2_MOUSE	Q9DBT5	AMP deaminase 2	-0.812219	0.000899043	0.00284416	0.569505	6
CR / old	Amt	GCST_MOUSE	Q8CFA2	Aminomethyltransferase, mitochondrial	0.478056	0.00819131	0.0173982	1.39287	14
CR+RF / old	Amt	GCST_MOUSE	Q8CFA2	Aminomethyltransferase, mitochondrial	0.270491	0.0232055	0.0395552	1.20622	14
old / young	Amy1	AMY1_MOUSE	P00687	Alpha-amylase 1	0.251178	0.00827891	0.0175368	1.19018	7
CR / old	Amy1	AMY1_MOUSE	P00687	Alpha-amylase 1	1.57413	2.30121e-09	2.597e-08	2.97755	7
CR+RF / CR	Amy1	AMY1_MOUSE	P00687	Alpha-amylase 1	-1.35692	7.42102e-09	7.67914e-08	0.390415	7
old / young	Amy2	AMYP_MOUSE	P00688	Pancreatic alpha-amylase	0.0339272	0.0290919	0.0472965	1.0238	16
CR / old	Ank1	ANK1_MOUSE	Q02357	Ankyrin-1	1.08678	6.85088e-08	5.97569e-07	2.124	24
CR+RF / old	Ank1	ANK1_MOUSE	Q02357	Ankyrin-1	-0.336096	0.00417742	0.0101433	0.792182	24
CR+RF / CR	Ank1	ANK1_MOUSE	Q02357	Ankyrin-1	-1.42288	8.55081e-12	1.31599e-10	0.372967	24
old / young	Ank3	ANK3_MOUSE	G5E8K5	Ankyrin-3	0.560632	0.000213095	0.000827063	1.47491	18
CR / old	Ank3	ANK3_MOUSE	G5E8K5	Ankyrin-3	0.232706	0.0129955	0.0250114	1.17504	18
CR+RF / old	Ank3	ANK3_MOUSE	G5E8K5	Ankyrin-3	0.267397	0.00249421	0.00661287	1.20363	18
CR+RF / CR	Ankrd28	ANR28_MOUSE	Q505D1	Serine/threonine-protein phosphatase 6 regulatory ankyrin repeat subunit A	0.275808	0.0298938	0.0482646	1.21067	2
old / young	Anp32a	AN32A_MOUSE	O35381	Acidic leucine-rich nuclear phosphoprotein 32 family member A	0.296089	0.000113904	0.000476196	1.22781	9
CR / old	Anp32b	AN32B_MOUSE	Q9EST5	Acidic leucine-rich nuclear phosphoprotein 32 family member B	0.444712	0.00122677	0.00367178	1.36104	5
old / young	Anp32e	AN32E_MOUSE	P97822	Acidic leucine-rich nuclear phosphoprotein 32 family member E	-0.162973	0.0288206	0.0469643	0.893183	6
CR / old	Anp32e	AN32E_MOUSE	P97822	Acidic leucine-rich nuclear phosphoprotein 32 family member E	0.591273	0.000184433	0.000727472	1.50658	6
old / young	Anpep	AMPN_MOUSE	P97449	Aminopeptidase N	0.54169	3.60232e-24	2.05178e-22	1.45568	47
CR / old	Anpep	AMPN_MOUSE	P97449	Aminopeptidase N	-0.274426	0.00871678	0.0182825	0.826779	47
CR+RF / CR	Anpep	AMPN_MOUSE	P97449	Aminopeptidase N	0.224419	6.53697e-05	0.00029266	1.16831	47
old / young	Anxa1	ANXA1_MOUSE	P10107	Annexin A1	0.802713	1.14299e-08	1.14282e-07	1.74438	13
CR+RF / CR	Anxa1	ANXA1_MOUSE	P10107	Annexin A1	-0.292698	0.0108433	0.0217068	0.816374	13
CR+RF / old	Anxa11	ANX11_MOUSE	P97384	Annexin A11	-0.2501	0.0276641	0.0455082	0.840838	15
CR+RF / CR	Anxa11	ANX11_MOUSE	P97384	Annexin A11	-0.0828092	0.0173051	0.0313714	0.944217	15
CR / old	Anxa13	ANX13_MOUSE	Q99JG3	Annexin A13	0.893316	0.000234225	0.000895766	1.85744	7
CR+RF / CR	Anxa13	ANX13_MOUSE	Q99JG3	Annexin A13	-0.95864	0.000217476	0.000840639	0.514542	7
CR / old	Anxa2	ANXA2_MOUSE	P07356	Annexin A2	0.0100209	0.00131339	0.00388378	1.00697	29
CR+RF / CR	Anxa2	ANXA2_MOUSE	P07356	Annexin A2	-0.323935	1.03589e-12	1.82143e-11	0.798888	29
old / young	Anxa3	ANXA3_MOUSE	O35639	Annexin A3	0.456068	1.78062e-07	1.42621e-06	1.3718	16
CR / old	Anxa3	ANXA3_MOUSE	O35639	Annexin A3	-0.692643	9.48012e-07	6.55008e-06	0.618719	16
CR+RF / old	Anxa3	ANXA3_MOUSE	O35639	Annexin A3	-0.405138	0.00413864	0.0100656	0.755164	16
old / young	Anxa4	ANXA4_MOUSE	P97429	Annexin A4	0.10477	0.0102065	0.0206744	1.07532	20
CR / old	Anxa4	ANXA4_MOUSE	P97429	Annexin A4	-0.18037	0.000216533	0.000837723	0.882476	20
CR+RF / old	Anxa4	ANXA4_MOUSE	P97429	Annexin A4	-0.0681012	0.00999561	0.0203547	0.953893	20
CR+RF / CR	Anxa5	ANXA5_MOUSE	P48036	Annexin A5	0.178532	8.39512e-05	0.000363746	1.13173	27
old / young	Anxa6	ANXA6_MOUSE	P14824	Annexin A6	0.355694	2.42268e-11	3.5522e-10	1.2796	52
CR / old	Anxa6	ANXA6_MOUSE	P14824	Annexin A6	-0.257452	2.5417e-06	1.58817e-05	0.836564	52
CR+RF / CR	Anxa6	ANXA6_MOUSE	P14824	Annexin A6	0.308917	2.39249e-10	3.11094e-09	1.23878	52
old / young	Anxa7	ANXA7_MOUSE	Q07076	Annexin A7	0.278441	0.014575	0.0274179	1.21288	16
CR+RF / CR	Anxa7	ANXA7_MOUSE	Q07076	Annexin A7	0.218162	0.000451814	0.00158135	1.16325	16
CR / old	Aox1	AOXA_MOUSE	O54754	Aldehyde oxidase 1	-0.488732	2.90752e-08	2.72322e-07	0.712651	15
CR+RF / CR	Aox1	AOXA_MOUSE	O54754	Aldehyde oxidase 1	0.533136	4.73954e-09	5.06377e-08	1.44707	15
old / young	Aox3	AOXC_MOUSE	G3X982	Aldehyde oxidase 3	-0.246362	3.67142e-12	5.94177e-11	0.84302	41
CR / old	Aox3	AOXC_MOUSE	G3X982	Aldehyde oxidase 3	-0.492622	2.73784e-19	1.00801e-17	0.710732	41
CR+RF / old	Aox3	AOXC_MOUSE	G3X982	Aldehyde oxidase 3	-0.177472	0.00124396	0.003712	0.884251	41
CR+RF / CR	Aox3	AOXC_MOUSE	G3X982	Aldehyde oxidase 3	0.31515	5.39084e-07	3.90909e-06	1.24414	41
CR / old	Ap1b1	AP1B1_MOUSE	O35643	AP-1 complex subunit beta-1	-0.0855628	0.00394008	0.00965498	0.942417	21
old / young	Ap1m1	AP1M1_MOUSE	P35585	AP-1 complex subunit mu-1	0.010792	0.0253719	0.04245	1.00751	10
CR / old	Ap2a2	AP2A2_MOUSE	P17427	AP-2 complex subunit alpha-2	-0.294192	2.06013e-08	1.97963e-07	0.815529	21
CR+RF / old	Ap2a2	AP2A2_MOUSE	P17427	AP-2 complex subunit alpha-2	-0.460926	7.65705e-07	5.38824e-06	0.72652	21
CR+RF / CR	Ap2a2	AP2A2_MOUSE	P17427	AP-2 complex subunit alpha-2	-0.166734	0.0260375	0.0433351	0.890857	21
CR / old	Ap2b1	AP2B1_MOUSE	Q9DBG3	AP-2 complex subunit beta	-0.316474	7.03425e-07	4.99746e-06	0.80303	30
CR+RF / old	Ap2b1	AP2B1_MOUSE	Q9DBG3	AP-2 complex subunit beta	-0.295071	0.00016768	0.000670342	0.815032	30
CR / old	Ap2s1	AP2S1_MOUSE	P62743	AP-2 complex subunit sigma	0.00769476	0.0253859	0.0424681	1.00535	3
old / young	Ap3b1	AP3B1_MOUSE	Q9Z1T1	AP-3 complex subunit beta-1	0.000718024	0.00614345	0.0138334	1.0005	17
CR / old	Ap3b1	AP3B1_MOUSE	Q9Z1T1	AP-3 complex subunit beta-1	-0.380601	0.0161762	0.0297703	0.768118	17
CR / old	Ap3d1	AP3D1_MOUSE	O54774	AP-3 complex subunit delta-1	-0.807517	0.00757655	0.0163451	0.571365	11
CR+RF / CR	Ap3d1	AP3D1_MOUSE	O54774	AP-3 complex subunit delta-1	0.911218	0.000380591	0.00136542	1.88063	11
old / young	Apeh	APEH_MOUSE	Q8R146	Acylamino-acid-releasing enzyme	-0.16471	0.00698723	0.0153193	0.892108	18
CR+RF / CR	Apeh	APEH_MOUSE	Q8R146	Acylamino-acid-releasing enzyme	0.0162363	0.0196095	0.0347221	1.01132	18
CR+RF / CR	Apex1	APEX1_MOUSE	P28352	DNA-(apurinic or apyrimidinic site) lyase	-0.332905	0.0124517	0.0242096	0.793936	8
old / young	Apip	MTNB_MOUSE	Q9WVQ5	Methylthioribulose-1-phosphate dehydratase	-0.490017	0.0234115	0.0398046	0.712017	4
old / young	Apmap	APMAP_MOUSE	Q9D7N9	Adipocyte plasma membrane-associated protein	0.136519	0.000721141	0.00236384	1.09925	11
old / young	Apoa1	APOA1_MOUSE	Q00623	Apolipoprotein A-I	0.857094	0.0096084	0.0197442	1.81139	21
CR / old	Apoa1	APOA1_MOUSE	Q00623	Apolipoprotein A-I	0.390206	0.00418342	0.0101542	1.31058	21
CR+RF / old	Apoa1	APOA1_MOUSE	Q00623	Apolipoprotein A-I	-0.556292	0.000610131	0.00204677	0.680048	21
CR+RF / CR	Apoa1	APOA1_MOUSE	Q00623	Apolipoprotein A-I	-0.946497	3.19689e-08	2.96921e-07	0.518891	21
old / young	Apoa1bp	NNRE_MOUSE	Q8K4Z3	NAD(P)H-hydrate epimerase	0.308606	1.3475e-06	8.96626e-06	1.23851	8
CR / old	Apoa2	APOA2_MOUSE	P09813	Apolipoprotein A-II	0.662176	3.2987e-06	2.00754e-05	1.58247	5
CR+RF / CR	Apoa2	APOA2_MOUSE	P09813	Apolipoprotein A-II	-0.14204	0.0284555	0.0464887	0.906237	5
CR / old	Apoa4	APOA4_MOUSE	P06728	Apolipoprotein A-IV	0.810063	2.12491e-48	6.43653e-46	1.75329	21
CR+RF / old	Apoa4	APOA4_MOUSE	P06728	Apolipoprotein A-IV	0.392169	1.3587e-07	1.11028e-06	1.31236	21
CR+RF / CR	Apoa4	APOA4_MOUSE	P06728	Apolipoprotein A-IV	-0.417894	1.55753e-24	9.22609e-23	0.748517	21
old / young	Apoa5	APOA5_MOUSE	Q8C7G5	Apolipoprotein A-V	0.735646	1.34412e-06	8.94825e-06	1.66514	13
CR / old	Apoa5	APOA5_MOUSE	Q8C7G5	Apolipoprotein A-V	-0.00138013	0.00140052	0.00409918	0.999044	13
CR+RF / CR	Apoa5	APOA5_MOUSE	Q8C7G5	Apolipoprotein A-V	0.0130679	1.81614e-05	9.353e-05	1.0091	13
old / young	Apob	APOB_MOUSE	E9Q414	Apolipoprotein B-100	0.0960596	0.0160369	0.0295547	1.06885	98
CR+RF / old	Apob	APOB_MOUSE	E9Q414	Apolipoprotein B-100	0.280935	0.00653794	0.0145278	1.21498	98
CR+RF / CR	Apob	APOB_MOUSE	E9Q414	Apolipoprotein B-100	0.189907	0.000525789	0.00180748	1.14069	98
old / young	Apoc1	APOC1_MOUSE	P34928	Apolipoprotein C-I	0.470923	0.0199984	0.0352565	1.386	3
CR / old	Apoc2	APOC2_MOUSE	Q05020	Apolipoprotein C-II	-0.658636	0.00775734	0.0166704	0.633477	3
CR+RF / CR	Apod	APOD_MOUSE	P51910	Apolipoprotein D	-1.37012	0.000319444	0.00117681	0.386859	3
old / young	Apoh	APOH_MOUSE	Q01339	Beta-2-glycoprotein 1	0.100894	0.00201184	0.00555497	1.07244	16
CR / old	Apoh	APOH_MOUSE	Q01339	Beta-2-glycoprotein 1	0.745951	1.49173e-08	1.46946e-07	1.67708	16
CR+RF / CR	Apoh	APOH_MOUSE	Q01339	Beta-2-glycoprotein 1	-0.671961	2.31618e-09	2.61168e-08	0.627653	16
old / young	Apool	MIC27_MOUSE	Q78IK4	MICOS complex subunit Mic27	-0.243975	0.0251387	0.0421644	0.844416	10
CR / old	Aprt	APT_MOUSE	P08030	Adenine phosphoribosyltransferase	0.789606	9.29212e-06	5.15378e-05	1.7286	10
CR+RF / old	Aprt	APT_MOUSE	P08030	Adenine phosphoribosyltransferase	0.546042	0.000100222	0.000424995	1.46007	10
CR+RF / CR	Aqp1	AQP1_MOUSE	Q02013	Aquaporin-1	-0.733028	0.0250674	0.0420901	0.60164	3
old / young	Arf1	ARF1_MOUSE	P84078	ADP-ribosylation factor 1	0.224685	0.00218151	0.00593734	1.16852	12
CR / old	Arf5	ARF5_MOUSE	P84084	ADP-ribosylation factor 5	0.399138	0.0251474	0.0421644	1.31872	4
CR+RF / CR	Arf6	ARF6_MOUSE	P62331	ADP-ribosylation factor 6	0.124923	0.000224867	0.000864942	1.09045	5
CR+RF / old	Arfgap2	ARFG2_MOUSE	Q99K28	ADP-ribosylation factor GTPase-activating protein 2	0.224509	0.00745049	0.0161186	1.16838	14
CR+RF / CR	Arfgap2	ARFG2_MOUSE	Q99K28	ADP-ribosylation factor GTPase-activating protein 2	0.540445	2.58939e-05	0.000128582	1.45442	14
CR / old	Arfgef1	BIG1_MOUSE	G3X9K3	Brefeldin A-inhibited guanine nucleotide-exchange protein 1	-0.261459	0.00858109	0.0180537	0.834244	11
CR+RF / CR	Arfgef1	BIG1_MOUSE	G3X9K3	Brefeldin A-inhibited guanine nucleotide-exchange protein 1	0.00833453	0.00847709	0.0178685	1.00579	11
[truncated: 4,365 more rows]
