# Supplementary material for: Short-Term Caloric Restriction and Subsequent Re-Feeding Compromise Liver Health and Associated Lipid Mediator Signaling in Aged Mice
Source: Nutrients. 2023 Aug 21;15(16):3660. doi: 10.3390/nu15163660 (PMC10458887; doi:10.3390/nu15163660)
Supplement: Supplementary file 1 [file nutrients-15-03660-s001.zip › Table_S2_CR_liver_LM_raw_data_supp.xlsx]

## Sheet: legend
abbreviations
AA	arachidonic acid
DHA	docohexaenoic acid
EPA	eicosapentaenoic acid
HDHA	hydroxy-docosahexaenoic acid
HEPE	hydroxy-eicosapentaenoic acid
HETE	hydroxy-eicosatetraenoic acid
HODE	hydroxy-octadecadienoic acid
LT	leukotriene
LX	lipoxin
MaR	maresin
PD	protectin
PG	prostaglandin
RvD	D-series resolvin
TX	thromboxane
additional information
	all values are given as ng of the respective mediator per g of liver
	statistical outliers are marked in dark red and were excluded from data analysis

## Sheet: CR liver - LM raw data
group	age	LM species	donor 1	donor 2	donor 3	donor 4	donor 5	donor 6
young	young	10-HDHA	168.395	61.873	173.373	125.282	203.244	83.9532
old	old	10-HDHA	73.8021	308.997	102.065	86.3137	98.2846	58.817
caloric restriction	old	10-HDHA	60.2967	88.7879	103.204	66.5301	122.323	151.556
refed	old	10-HDHA	43.6701	57.3787	35.8242	35.4782	83.4251	42.3204
young	young	11-HEPE	33.978	15.4433	39.5962	20.1026	36.8865	12.5714
old	old	11-HEPE	12.7957	93.5876	24.9191	21.506	25.371	12.3297
caloric restriction	old	11-HEPE	13.5406	24.3019	26.313	21.735	28.0527	40.4595
refed	old	11-HEPE	15.8018	29.3062	11.5021	15.8523	19.8373	8.98125
young	young	11-HETE	658.36	299.835	731.754	583.993	786.205	385.947
old	old	11-HETE	321.237	1390.02	438.394	456.103	417.927	231.875
caloric restriction	old	11-HETE	258.955	373.076	524.439	399.779	447.738	595.529
refed	old	11-HETE	174.133	271.208	157.653	130.693	353.635	206.329
young	young	12-HEPE	41.1344	18.9603	54.397	25.7552	46.0301	14.0303
old	old	12-HEPE	17.6092	134.143	43.5408	31.4017	33.882	14.0247
caloric restriction	old	12-HEPE	32.8823	35.7882	43.6502	43.63	46.8967	61.6615
refed	old	12-HEPE	20.635	40.2695	14.7464	22.7211	30.1707	11.7742
young	young	12-HETE	705.986	304.578	829.275	614.767	929.658	313.394
old	old	12-HETE	327.398	1591.44	484.426	499.91	413.518	190.72
caloric restriction	old	12-HETE	415.908	408.355	600.153	510.247	540.899	764.214
refed	old	12-HETE	156.857	271.587	173.947	144.66	381.04	208.152
young	young	13-HDHA	256.086	100.332	284.719	210.256	365.718	116.272
old	old	13-HDHA	102.012	566.87	166.934	127.024	177.502	86.0704
caloric restriction	old	13-HDHA	94.8368	147.952	165.573	101.765	156.331	241.521
refed	old	13-HDHA	53.1346	86.3268	55.3805	50.6292	123.344	59.0393
young	young	13-HODE	22708.7	11903.8	32325.4	15378.6	25946.1	12488.4
old	old	13-HODE	8572.78	52806.5	23949.9	9033.42	22344.9	5083.4
caloric restriction	old	13-HODE	7052.74	13606.2	21190	22051.3	15932.9	24580.4
refed	old	13-HODE	7433.33	7441.45	4612.24	3557.74	4180.3	1724.64
young	young	14-HDHA	432.2	158.745	474.17	315.967	606.194	198.117
old	old	14-HDHA	156.837	839.331	244.68	194.62	245.892	124.476
caloric restriction	old	14-HDHA	158.424	222.829	261.969	173.67	287.938	358.622
refed	old	14-HDHA	84.1683	130.556	79.138	75.6	188.9	93.3815
young	young	15d-PGJ2	9.99837	9.80869	17.4341	15.3554	19.3574	14.529
old	old	15d-PGJ2	10.3556	12.3261	11.9063	12.5188	10.065	5.78699
caloric restriction	old	15d-PGJ2	3.26427	8.17532	16.6128	8.01191	5.23787	9.31733
refed	old	15d-PGJ2	10.5168	7.53024	6.48054	4.81997	7.01024	4.79276
young	young	15-HEPE	48.2039	19.2428	63.5837	25.6979	57.7486	14.7854
old	old	15-HEPE	14.4517	154.584	36.6086	24.2098	38.864	16.0198
caloric restriction	old	15-HEPE	19.1769	35.5696	42.8264	39.4671	38.47	55.2343
refed	old	15-HEPE	20.5991	44.1449	15.3006	19.9853	28.1808	10.8008
young	young	15-HETE	1520.93	586.676	1443.56	1104.06	1813.07	614.942
old	old	15-HETE	549.949	2915.26	806.53	736.172	755.816	403.705
caloric restriction	old	15-HETE	463.059	768.893	1001.64	835.167	813.775	1058.05
refed	old	15-HETE	288.042	559.646	333.257	237.641	601.932	350.052
young	young	17-HDHA	485.864	215.23	672.788	424.284	806.122	249.17
old	old	17-HDHA	220.98	1397.47	383.291	262.189	394.723	193.231
caloric restriction	old	17-HDHA	219.581	331.281	385.813	289.606	354.434	484.208
refed	old	17-HDHA	131.357	192.816	107.948	84.2383	281.587	119.016
young	young	18-HEPE	134.936	53.258	152.066	65.3213	145.034	38.6745
old	old	18-HEPE	42.7683	362.35	101.106	64.6487	95.2894	42.7966
caloric restriction	old	18-HEPE	51.6908	93.0795	116.895	110.28	108.846	139.958
refed	old	18-HEPE	59.5237	112.272	41.462	53.6088	69.0591	30.1237
young	young	4-HDHA	142.388	76.1065	165.914	129.725	202.777	76.6014
old	old	4-HDHA	86.8535	313.127	95.9067	87.4966	89.3394	49.6161
caloric restriction	old	4-HDHA	78.2855	97.9408	108.639	84.3514	184.992	159.348
refed	old	4-HDHA	36.2375	35.26	26.6297	31.0458	78.3583	40.178
young	young	5,12-S-diHETE	160.299	66.4454	149.699	124.528	230.31	37.4334
old	old	5,12-S-diHETE	28.8667	380.46	96.8394	44.1532	133.147	32.5563
caloric restriction	old	5,12-S-diHETE	46.232	99.112	176.38	154.236	66.7985	162.501
refed	old	5,12-S-diHETE	31.1853	97.5708	46.5287	20.6915	48.6683	34.9252
young	young	5,15-diHETE	967.94	411.516	816.473	715.031	1260.97	257.751
old	old	5,15-diHETE	202.685	2001.18	709.841	285.931	860.093	239.114
caloric restriction	old	5,15-diHETE	290.917	679.079	1142.22	1135.95	371.447	950.693
refed	old	5,15-diHETE	212.253	635.069	365.782	144.128	308.976	237.365
young	young	5-HEPE	49.6391	20.1799	48.5406	28.8572	41.733	18.2863
old	old	5-HEPE	21.1875	90.6938	32.4347	30.8271	28.0912	18.3006
caloric restriction	old	5-HEPE	20.3406	30.6256	30.6305	25.3238	42.7088	46.3458
refed	old	5-HEPE	32.5911	45.4582	18.8962	31.6753	38.2738	15.1357
young	young	5-HETE	392.955	179.235	444.249	387.882	674.161	201.416
old	old	5-HETE	215.778	865.228	281.931	250.342	268.817	121.66
caloric restriction	old	5-HETE	184.154	265.544	397.302	292.185	383.417	406.826
refed	old	5-HETE	132.094	191.036	109.621	94.8779	228.52	125.876
young	young	5S,6R-diHETE	7.83864	4.12597	9.78721	7.55021	13.3978	3.00862
old	old	5S,6R-diHETE	4.10752	25.4927	5.9917	4.51207	7.52412	3.33549
caloric restriction	old	5S,6R-diHETE	4.40272	5.60198	12.1934	13.6729	6.38464	12.3157
refed	old	5S,6R-diHETE	2.86234	6.01444	3.60592	1.25537	4.46178	2.27215
young	young	6k-PGF1α	157.499	334.246	347.32	908	315.793	338.524
old	old	6k-PGF1α	359.557	373.055	580.675	789.283	272.157	269.766
caloric restriction	old	6k-PGF1α	380.571	339.645	356.565	170.617	147.129	306.455
refed	old	6k-PGF1α	118.62	286.554	158.36	175.648	189.564	297.493
young	young	7-HDHA	98.8732	43.8516	105.785	83.2441	112.509	65.9315
old	old	7-HDHA	53.7347	177.023	71.183	69.0909	62.0913	46.8387
caloric restriction	old	7-HDHA	49.7962	60.0367	66.2215	45.6865	91.7451	106.085
refed	old	7-HDHA	41.3133	47.5232	25.0671	28.2465	59.3839	34.377
young	young	8-HETE	275.879	131.674	329.927	242.185	386.376	171.155
old	old	8-HETE	138.787	625.711	189.635	185.308	181.543	113.673
caloric restriction	old	8-HETE	122.535	192.525	238.795	195.894	248.791	334.313
refed	old	8-HETE	98.5216	135.346	74.9186	61.2782	156.763	102.982
young	young	9-HODE	13620.7	7364.33	22915.6	9288.48	16577.7	7750.97
old	old	9-HODE	5433.31	32967.4	15638.3	5432.8	14720.4	3092.63
caloric restriction	old	9-HODE	4338.84	8172.42	13707.9	13234.4	9863.92	15874.9
refed	old	9-HODE	4399.42	4362.25	2786.39	2259.92	2805.99	1178.16
young	young	AA	303601	439647	592745	474722	294405	545849
old	old	AA	606978	178264	283277	412600	235938	297206
caloric restriction	old	AA	415982	299734	157769	99194	359701	406564
refed	old	AA	776551	142668	270024	275531	319266	295575
young	young	DHA	208838	302410	423975	320542	182755	298126
old	old	DHA	342877	91921.2	225453	257571	184477	214600
caloric restriction	old	DHA	281704	194878	90756.7	56961.9	218292	282435
refed	old	DHA	568592	86574.2	162153	164308	198770	183125
young	young	EPA	84720	111235	220743	107610	55867.7	121161
old	old	EPA	170312	42314.5	101558	117508	68406.4	65340.7
caloric restriction	old	EPA	103884	83205	43226.6	31540.6	119683	118365
refed	old	EPA	337075	52128	77656.7	151324	90966.2	52350.5
young	young	epi-trans-LTB4	129.092	40.9824	85.1407	68.3873	135.243	31.5327
old	old	epi-trans-LTB4	19.5484	169.283	55.8555	26.1516	84.0635	22.053
caloric restriction	old	epi-trans-LTB4	24.8284	57.797	98.5624	86.1401	36.1709	75.5696
refed	old	epi-trans-LTB4	18.3206	59.7524	34.226	14.8272	31.1704	24.9614
young	young	LTB4	13.7342	5.18807	13.42	7.92103	16.8883	2.97272
old	old	LTB4	2.19934	15.8882	8.4752	2.87165	9.70808	1.71412
caloric restriction	old	LTB4	2.8003	4.19403	9.53083	11.5556	2.15804	7.08974
refed	old	LTB4	2.0224	4.71508	3.11581	1.32255	2.60298	2.02791
young	young	LXB5	70.4456	30.4024	73.4114	22.9851	101.321	23.0136
old	old	LXB5	6.64157	149.345	74.6487	11.7192	105.115	9.12548
caloric restriction	old	LXB5	13.1944	46.1847	69.1255	75.684	16.6779	52.4064
refed	old	LXB5	26.467	49.8798	14.336	11.2086	20.9275	12.801
young	young	MaR2	11.7693	5.19133	11.6745	10.8708	18.342	3.66272
old	old	MaR2	4.16276	28.9692	9.21822	5.82779	13.8794	4.67257
caloric restriction	old	MaR2	5.84154	8.71913	11.4132	12.1401	7.13651	16.177
refed	old	MaR2	2.70158	7.06623	3.9239	2.05328	5.13706	2.8616
young	young	PDX	60.424	21.5423	49.6931	33.7549	77.3862	14.7802
old	old	PDX	9.83039	113.698	36.2319	13.7534	56.1138	15.5262
caloric restriction	old	PDX	19.029	36.0427	48.4423	39.4259	18.0139	55.4548
refed	old	PDX	10.8873	34.8742	15.279	8.13159	17.7652	11.0486
young	young	PGD2	88.7099	112.676	121.545	131.905	185.752	66.886
old	old	PGD2	61.1117	147.779	134.213	92.8678	166.228	49.4584
caloric restriction	old	PGD2	85.7157	114.77	158.011	117.262	57.4765	132.053
refed	old	PGD2	33.3048	95.776	42.476	26.8626	52.2153	50.2507
young	young	PGE1	108.862	100.415	120.48	132.473	109.972	91.8111
old	old	PGE1	76.4354	85.877	103.452	114.602	107.479	66.2664
caloric restriction	old	PGE1	70.1474	78.7907	95.3659	59.3649	38.294	86.1725
refed	old	PGE1	43.122	88.7473	59.417	49.1361	71.7397	66.7746
young	young	PGE2	131.614	145.45	156.882	214.177	185.734	163.189
old	old	PGE2	139.672	228.673	207.941	200.918	252.009	119.011
caloric restriction	old	PGE2	154.447	162.393	238.041	162.842	106.321	229.59
refed	old	PGE2	88.9509	166.518	80.8775	66.2396	122.853	117.801
young	young	PGF1α	10.0157	12.0865	12.4132	13.6217	13.3358	10.9402
old	old	PGF1α	7.21598	9.08317	9.92056	10.6636	11.3885	7.26833
caloric restriction	old	PGF1α	5.62977	5.73657	8.22125	7.23001	4.39918	7.57916
refed	old	PGF1α	6.1787	13.7279	10.0486	9.12311	8.50495	7.11191
young	young	PGF2α	117.38	210.912	163.045	342.972	110.092	210.573
old	old	PGF2α	172.101	103.448	183.603	362.761	142.668	163.395
caloric restriction	old	PGF2α	209.958	145.818	136.047	53.324	104.707	174.457
refed	old	PGF2α	61.0053	177.515	110.597	84.9772	122.933	162.26
young	young	PGF2β	78.0348	75.8304	74.8972	90.4646	92.4857	62.1145
old	old	PGF2β	42.8521	89.1984	91.5483	76.32	104.907	54.5959
caloric restriction	old	PGF2β	44.8231	70.0222	111.675	81.3605	42.2178	94.1799
refed	old	PGF2β	38.5357	56.3127	42.063	25.4336	39.8825	37.0016
young	young	PGF3α	7.61038	7.98828	7.64716	7.41569	10.4391	3.72754
old	old	PGF3α	3.17294	11.2272	14.2059	7.15394	14.9673	4.33157
caloric restriction	old	PGF3α	5.5716	9.03686	12.3989	12.0582	4.80745	11.8835
refed	old	PGF3α	4.05469	9.08114	4.31298	3.29973	3.82947	2.41858
young	young	PGJ2	4.0919	2.89985	2.97558	2.48261	7.30804	1.4214
old	old	PGJ2	0.790258	9.47262	4.65911	1.58408	6.75281	1.35853
caloric restriction	old	PGJ2	1.29387	2.76616	7.27428	7.89005	1.50651	5.86617
refed	old	PGJ2	0.94786	1.83253	1.40144	0.606196	1.59351	0.730629
young	young	RvD5	50.7	18.6	37.1	28.2	60.6	10.1
old	old	RvD5	7.3	103.6	28.3	12.1	44	13.6
caloric restriction	old	RvD5	14.5	28.9	33.6	31.4	15.5	47.6
refed	old	RvD5	7.8	30.2	14.8	5.5	14.4	9
young	young	trans-LTB4	72.3137	23.9709	47.4589	40.3556	83.2467	19.9477
old	old	trans-LTB4	13.4018	104.972	31.6437	17.5868	46.073	13.8657
caloric restriction	old	trans-LTB4	19.2305	35.8875	51.4446	42.701	24.2444	44.0525
refed	old	trans-LTB4	10.162	31.3838	15.5265	7.03294	19.1354	15.6961
young	young	TXB2	42.6579	96.2776	89.3315	179.084	73.8583	98.2033
old	old	TXB2	71.0594	77.5078	99.7904	178.665	64.1391	59.7737
caloric restriction	old	TXB2	73.3577	65.1037	111.096	42.9595	41.8221	92.4965
refed	old	TXB2	28.1765	55.4941	36.0169	27.6736	45.0951	57.0349

## Sheet: analytes and standards
analyte	formal name	Q1	Q3	LOD [pg]
LTB4	5S,12R-dihydroxy-6Z,8E,10E,14Z-eicosatetraenoic acid	335.2	195.1	12.5
trans-LTB4	5S,12R-dihydroxy-6E,8E,10E,14Z-eicosatetraenoic acid	335.2	195.1	12.5
epi-trans-LTB4	5S,12S-dihydroxy-6E,8E,10E,14Z-eicosatetraenoic acid	335.2	195.1	12.5
PGD2	15S-dihydroxy-11-oxo-prosta-5Z,13E-dien-1-oic acid	351.3	233.1	1.5625
PGE1	9-oxo-11alpha,15S-dihydroxy-prost-13E-en-1-oic acid	353.1	273.2	12.5
PGE2	9-oxo-11alpha,15S-dihydroxy-prosta-5Z,13E-dien-1-oic acid	351.3	189.1	6.25
PGF1α	9alpha,11alpha,15S-trihydroxy-prost-13E-en-1-oic acid	355.3	211.1	3.125
PGF2α	9alpha,11alpha,15S-trihydroxy-prosta-5Z,13E-dien-1-oic acid	353.3	193.1	3.125
PGF2β	9beta,11alpha,15S-trihydroxy-prosta-5Z,13E-dien-1-oic acid	353.2	193.1	12.5
PGF3α	9alpha,11alpha,15S-trihydroxy-prosta-5Z,13E,17Z-trien-1-oic acid	351.3	307.1	12.5
PGJ2	11-oxo-15S-hydroxy-prosta-5Z,9,13E-trien-1-oic acid	333.1	271.2	6.25
15-deoxy-PGJ2	11-oxo-prosta-5Z,9,12E,14E-tetraen-1-oic acid	315.2	271.1	6.25
6-keto-PGF1α	6-oxo-9alpha,11alpha,15S-trihydroxy-prost-13E-en-1-oic acid	369.2	245.1	25
TXB2	9alpha,11,15S-trihydroxythromba-5Z,13E-dien-1-oic acid	369.3	169.1	12.5
LXB5	5S,14R,15S-trihydroxy-eicosa-6E,8Z,10E,12E,17Z-pentaenoic acid	349.2	221.1	12.5
MaR2	13R,14S-dihydroxy-4Z,7Z,9E,11E,16Z,19Z-docosahexaenoic acid	359.2	221	6.25
PDX	10(S),17(S)-dihydroxy-4Z,7Z,11E,13Z,15E,19Z-docosahexaenoic acid	359.2	153.1	3.125
RvD5	7S,17S-dihydroxy-4Z,8E,10Z,13Z,15E,19Z-docosahexaenoic acid	359.2	261.1	3.125
5-HETE	(±)5-hydroxy-6E,8Z,11Z,14Z-eicosatetraenoic acid	319.2	115.1	3.125
8-HETE	(±)8-hydroxy-5Z,9E,11Z,14Z-eicosatetraenoic acid	319.2	155	25
11-HETE	(±)11-hydroxy-5Z,8Z,12E,14Z-eicosatetraenoic acid	319.2	167.1	3.125
12-HETE	(±)12-hydroxy-5Z,8Z,10E,14Z-eicosatetraenoic acid	319.2	179.1	6.25
15-HETE	(±)15-hydroxy-5Z,8Z,11Z,13E-eicosatetraenoic acid	319.2	219.1	6.25
5S,6R-diHETE	5S,6R-dihydroxy-7E,9E,11Z,14Z-eicosatetraenoic acid	335.2	115.1	3.125
5,12-S-diHETE	5S,12S-dihydroxy-6E,8Z,10E,14Z-eicosatetraenoic acid	335.1	195.1	2
5,15-diHETE	5S,12S-dihydroxy-6E,8Z,10E,14Z-eicosatetraenoic acid	335.3	235.1	5
4-HDHA	(±)4-hydroxy-5E,7Z,10Z,13Z,16Z,19Z-docosahexaenoic acid	343.2	101.1	6.25
7-HDHA	(±)7-hydroxy-4Z,8E,10Z,13Z,16Z,19Z-docosahexaenoic acid	343.2	141.1	12.5
10-HDHA	(±)10-hydroxy-4Z,7Z,11E,13Z,16Z,19Z-docosahexaenoic acid	343.3	152.9	3.125
13-HDHA	(±)13-hydroxy-4Z,7Z,10Z,14E,16Z,19Z-docosahexaenoic acid	343.2	193.1	3.125
14-HDHA	14S-hydroxy-4Z,7Z,10Z,12E,16Z,19Z-docosahexaenoic acid	343.2	205.1	3.125
17-HDHA	(±)17-hydroxy-4Z,7Z,10Z,13Z,15E,19Z-docosahexaenoic acid	343.2	245.1	3.125
5-HEPE	(±)-5-hydroxy-6E,8Z,11Z,14Z,17Z-eicosapentaenoic acid	317.2	115.1	3.125
11-HEPE	(±)-11-hydroxy-5Z,8Z,12E,14Z,17Z-eicosapentaenoic acid	317.2	167.1	3.125
12-HEPE	(±)-12-hydroxy-5Z,8Z,10E,14Z,17Z-eicosapentaenoic acid	317.2	179.1	3.125
15-HEPE	(±)-15-hydroxy-5Z,8Z,11Z,13E,17Z-eicosapentaenoic acid	317.2	219.1	6.25
18-HEPE	(±)-18-hydroxy-5Z,8Z,11Z,14Z,16E-eicosapentaenoic acid	317.2	259.1	3.125
9-HODE	(±)-9-hydroxy-10E,12Z-octadecadienoic acid	295.2	171	50
13-HODE	(±)-13-hydroxy-9Z,11E-octadecadienoic acid	295.2	195	125
AA	5Z,8Z,11Z,14Z-eicosatetraenoic acid	303.3	259.1	312.5
DHA	4Z,7Z,10Z,13Z,16Z,19Z-docosahexaenoic acid	327.3	283.1	312.5
EPA	5Z,8Z,11Z,14Z,17Z-eicosapentaenoic acid	327.3	283.1	312.5
d8-5S-HETE	5S-hydroxy-6E,8Z,11Z,14Z-eicosatetraenoic-5,6,8,9,11,12,14,15-d8 acid	327.3	116.1	20
d4-LTB4	5S,12R-dihydroxy-6Z,8E,10E,14Z-eicosatetraenoic-6,7,14,15-d4 acid	339.3	197.2	20
d4-PGE2	9-oxo-11α,15S-dihydroxy-prosta-5Z,13E-dien-1-oic-3,3,4,4-d4 acid	355.3	193.2	20
d5-LXA4	5S,6R,15S-trihydroxyicosa-7E,9E,11Z,13E-tetraenoic-19,19,20,20,20-d5 acid	356.3	115.2	20
d5-RvD2	7S,16R,17S-trihydroxy-4Z,8E,10Z,12E,14E,19Z-21,21’,22,22,22-d5 docosahexaenoic acid	380.3	141.2	20
d8-AA	5Z,8Z,11Z,14Z-eicosatetraenoic-5,6,8,9,11,12,14,15-d8 acid	311.3	267.1	2000
