# Supplementary material for: Short-Term Caloric Restriction and Subsequent Re-Feeding Compromise Liver Health and Associated Lipid Mediator Signaling in Aged Mice
Source: Nutrients. 2023 Aug 21;15(16):3660. doi: 10.3390/nu15163660 (PMC10458887; doi:10.3390/nu15163660)
Supplement: Supplementary file 1 [file nutrients-15-03660-s001.zip › Table_S3_CR_liver_p_values.xlsx]

## Sheet: Tabelle1
comparison	method	readout	statistical method	summary	p-value
Y vs. O	cell marker	L-CA (CD45)	ordinary one-way ANOVA with Tukey's multiple comparisons test	ns	0.9275
Y vs. CR	cell marker	L-CA (CD45)	ordinary one-way ANOVA with Tukey's multiple comparisons test	ns	0.8634
Y vs. CR+RF	cell marker	L-CA (CD45)	ordinary one-way ANOVA with Tukey's multiple comparisons test	ns	0.7009
O vs. CR	cell marker	L-CA (CD45)	ordinary one-way ANOVA with Tukey's multiple comparisons test	ns	0.9998
O vs. CR+RF	cell marker	L-CA (CD45)	ordinary one-way ANOVA with Tukey's multiple comparisons test	ns	0.9831
CR vs. CR+RF	cell marker	L-CA (CD45)	ordinary one-way ANOVA with Tukey's multiple comparisons test	ns	0.9893
Y vs. O	cell marker	CD18	ordinary one-way ANOVA with Tukey's multiple comparisons test	ns	0.9982
Y vs. CR	cell marker	CD18	ordinary one-way ANOVA with Tukey's multiple comparisons test	ns	0.9682
Y vs. CR+RF	cell marker	CD18	ordinary one-way ANOVA with Tukey's multiple comparisons test	ns	0.7168
O vs. CR	cell marker	CD18	ordinary one-way ANOVA with Tukey's multiple comparisons test	ns	0.9952
O vs. CR+RF	cell marker	CD18	ordinary one-way ANOVA with Tukey's multiple comparisons test	ns	0.8623
CR vs. CR+RF	cell marker	CD18	ordinary one-way ANOVA with Tukey's multiple comparisons test	ns	0.9282
Y vs. O	cell marker	CD32	Brown-Forsythe ANOVA test with Dunnett's T3 multiple comparisons test	ns	0.0682
Y vs. CR	cell marker	CD32	Brown-Forsythe ANOVA test with Dunnett's T3 multiple comparisons test	ns	0.8828
Y vs. CR+RF	cell marker	CD32	Brown-Forsythe ANOVA test with Dunnett's T3 multiple comparisons test	ns	0.1876
O vs. CR	cell marker	CD32	Brown-Forsythe ANOVA test with Dunnett's T3 multiple comparisons test	ns	0.1229
O vs. CR+RF	cell marker	CD32	Brown-Forsythe ANOVA test with Dunnett's T3 multiple comparisons test	ns	0.9981
CR vs. CR+RF	cell marker	CD32	Brown-Forsythe ANOVA test with Dunnett's T3 multiple comparisons test	ns	0.2906
Y vs. O	cell marker	CD97	ordinary one-way ANOVA with Tukey's multiple comparisons test	ns	0.9998
Y vs. CR	cell marker	CD97	ordinary one-way ANOVA with Tukey's multiple comparisons test	ns	0.9941
Y vs. CR+RF	cell marker	CD97	ordinary one-way ANOVA with Tukey's multiple comparisons test	ns	0.5075
O vs. CR	cell marker	CD97	ordinary one-way ANOVA with Tukey's multiple comparisons test	ns	0.9896
O vs. CR+RF	cell marker	CD97	ordinary one-way ANOVA with Tukey's multiple comparisons test	ns	0.6447
CR vs. CR+RF	cell marker	CD97	ordinary one-way ANOVA with Tukey's multiple comparisons test	ns	0.369
Y vs. O	cell marker	CD68	ordinary one-way ANOVA with Tukey's multiple comparisons test	ns	0.9192
Y vs. CR	cell marker	CD68	ordinary one-way ANOVA with Tukey's multiple comparisons test	ns	0.6939
Y vs. CR+RF	cell marker	CD68	ordinary one-way ANOVA with Tukey's multiple comparisons test	ns	0.3398
O vs. CR	cell marker	CD68	ordinary one-way ANOVA with Tukey's multiple comparisons test	ns	0.985
O vs. CR+RF	cell marker	CD68	ordinary one-way ANOVA with Tukey's multiple comparisons test	ns	0.8007
CR vs. CR+RF	cell marker	CD68	ordinary one-way ANOVA with Tukey's multiple comparisons test	ns	0.9225
Y vs. O	cell marker	CD14	ordinary one-way ANOVA with Tukey's multiple comparisons test	ns	0.4591
Y vs. CR	cell marker	CD14	ordinary one-way ANOVA with Tukey's multiple comparisons test	ns	0.2394
Y vs. CR+RF	cell marker	CD14	ordinary one-way ANOVA with Tukey's multiple comparisons test	ns	>0.9999
O vs. CR	cell marker	CD14	ordinary one-way ANOVA with Tukey's multiple comparisons test	ns	0.9938
O vs. CR+RF	cell marker	CD14	ordinary one-way ANOVA with Tukey's multiple comparisons test	ns	0.5098
CR vs. CR+RF	cell marker	CD14	ordinary one-way ANOVA with Tukey's multiple comparisons test	ns	0.2905
Y vs. O	cell marker	AIF-1	ordinary one-way ANOVA with Tukey's multiple comparisons test	ns	0.9854
Y vs. CR	cell marker	AIF-1	ordinary one-way ANOVA with Tukey's multiple comparisons test	ns	0.9573
Y vs. CR+RF	cell marker	AIF-1	ordinary one-way ANOVA with Tukey's multiple comparisons test	ns	>0.9999
O vs. CR	cell marker	AIF-1	ordinary one-way ANOVA with Tukey's multiple comparisons test	ns	0.8557
O vs. CR+RF	cell marker	AIF-1	ordinary one-way ANOVA with Tukey's multiple comparisons test	ns	0.9829
CR vs. CR+RF	cell marker	AIF-1	ordinary one-way ANOVA with Tukey's multiple comparisons test	ns	0.9623
Y vs. O	cell marker	F4/80	ordinary one-way ANOVA with Tukey's multiple comparisons test	ns	0.0631
Y vs. CR	cell marker	F4/80	ordinary one-way ANOVA with Tukey's multiple comparisons test	ns	0.0557
Y vs. CR+RF	cell marker	F4/80	ordinary one-way ANOVA with Tukey's multiple comparisons test	ns	0.5857
O vs. CR	cell marker	F4/80	ordinary one-way ANOVA with Tukey's multiple comparisons test	ns	0.9996
O vs. CR+RF	cell marker	F4/80	ordinary one-way ANOVA with Tukey's multiple comparisons test	ns	0.4179
CR vs. CR+RF	cell marker	F4/80	ordinary one-way ANOVA with Tukey's multiple comparisons test	ns	0.4236
Y vs. O	cell marker	Siglec-1	Brown-Forsythe ANOVA test with Dunnett's T3 multiple comparisons test	ns	0.5864
Y vs. CR	cell marker	Siglec-1	Brown-Forsythe ANOVA test with Dunnett's T3 multiple comparisons test	ns	0.5443
Y vs. CR+RF	cell marker	Siglec-1	Brown-Forsythe ANOVA test with Dunnett's T3 multiple comparisons test	ns	0.4668
O vs. CR	cell marker	Siglec-1	Brown-Forsythe ANOVA test with Dunnett's T3 multiple comparisons test	ns	0.3074
O vs. CR+RF	cell marker	Siglec-1	Brown-Forsythe ANOVA test with Dunnett's T3 multiple comparisons test	ns	>0.9999
CR vs. CR+RF	cell marker	Siglec-1	Brown-Forsythe ANOVA test with Dunnett's T3 multiple comparisons test	ns	0.2906
Y vs. O	cell marker	IL-1R1	ordinary one-way ANOVA with Tukey's multiple comparisons test	ns	0.862
Y vs. CR	cell marker	IL-1R1	ordinary one-way ANOVA with Tukey's multiple comparisons test	ns	0.0854
Y vs. CR+RF	cell marker	IL-1R1	ordinary one-way ANOVA with Tukey's multiple comparisons test	ns	0.0584
O vs. CR	cell marker	IL-1R1	ordinary one-way ANOVA with Tukey's multiple comparisons test	*	0.031
O vs. CR+RF	cell marker	IL-1R1	ordinary one-way ANOVA with Tukey's multiple comparisons test	ns	0.3639
CR vs. CR+RF	cell marker	IL-1R1	ordinary one-way ANOVA with Tukey's multiple comparisons test	***	0.0003
Y vs. O	cell marker	CD54	ordinary one-way ANOVA with Tukey's multiple comparisons test	ns	0.2663
Y vs. CR	cell marker	CD54	ordinary one-way ANOVA with Tukey's multiple comparisons test	ns	0.9101
Y vs. CR+RF	cell marker	CD54	ordinary one-way ANOVA with Tukey's multiple comparisons test	ns	0.6083
O vs. CR	cell marker	CD54	ordinary one-way ANOVA with Tukey's multiple comparisons test	ns	0.6186
O vs. CR+RF	cell marker	CD54	ordinary one-way ANOVA with Tukey's multiple comparisons test	ns	0.8612
CR vs. CR+RF	cell marker	CD54	ordinary one-way ANOVA with Tukey's multiple comparisons test	ns	0.9517
Y vs. O	cell marker	Arg-1	ordinary one-way ANOVA with Tukey's multiple comparisons test	ns	0.105
Y vs. CR	cell marker	Arg-1	ordinary one-way ANOVA with Tukey's multiple comparisons test	**	0.0025
Y vs. CR+RF	cell marker	Arg-1	ordinary one-way ANOVA with Tukey's multiple comparisons test	ns	0.6294
O vs. CR	cell marker	Arg-1	ordinary one-way ANOVA with Tukey's multiple comparisons test	ns	0.5356
O vs. CR+RF	cell marker	Arg-1	ordinary one-way ANOVA with Tukey's multiple comparisons test	ns	0.5398
CR vs. CR+RF	cell marker	Arg-1	ordinary one-way ANOVA with Tukey's multiple comparisons test	*	0.0321
Y vs. O	cell marker	Ym1	ordinary one-way ANOVA with Tukey's multiple comparisons test	ns	0.0632
Y vs. CR	cell marker	Ym1	ordinary one-way ANOVA with Tukey's multiple comparisons test	*	0.0118
Y vs. CR+RF	cell marker	Ym1	ordinary one-way ANOVA with Tukey's multiple comparisons test	**	0.0094
O vs. CR	cell marker	Ym1	ordinary one-way ANOVA with Tukey's multiple comparisons test	ns	0.9698
O vs. CR+RF	cell marker	Ym1	ordinary one-way ANOVA with Tukey's multiple comparisons test	ns	0.9473
CR vs. CR+RF	cell marker	Ym1	ordinary one-way ANOVA with Tukey's multiple comparisons test	ns	0.9995
Y vs. O	cell marker	Ym2	ordinary one-way ANOVA with Tukey's multiple comparisons test	ns	0.9996
Y vs. CR	cell marker	Ym2	ordinary one-way ANOVA with Tukey's multiple comparisons test	ns	0.8533
Y vs. CR+RF	cell marker	Ym2	ordinary one-way ANOVA with Tukey's multiple comparisons test	ns	0.7627
O vs. CR	cell marker	Ym2	ordinary one-way ANOVA with Tukey's multiple comparisons test	ns	0.9264
O vs. CR+RF	cell marker	Ym2	ordinary one-way ANOVA with Tukey's multiple comparisons test	ns	0.8652
CR vs. CR+RF	cell marker	Ym2	ordinary one-way ANOVA with Tukey's multiple comparisons test	ns	0.9979
Y vs. O	cell marker	CD163	ordinary one-way ANOVA with Tukey's multiple comparisons test	ns	0.2065
Y vs. CR	cell marker	CD163	ordinary one-way ANOVA with Tukey's multiple comparisons test	**	0.003
Y vs. CR+RF	cell marker	CD163	ordinary one-way ANOVA with Tukey's multiple comparisons test	*	0.0364
O vs. CR	cell marker	CD163	ordinary one-way ANOVA with Tukey's multiple comparisons test	ns	0.3706
O vs. CR+RF	cell marker	CD163	ordinary one-way ANOVA with Tukey's multiple comparisons test	ns	0.9252
CR vs. CR+RF	cell marker	CD163	ordinary one-way ANOVA with Tukey's multiple comparisons test	ns	0.6529
Y vs. O	cell marker	CD206	ordinary one-way ANOVA with Tukey's multiple comparisons test	ns	0.9879
Y vs. CR	cell marker	CD206	ordinary one-way ANOVA with Tukey's multiple comparisons test	ns	0.212
Y vs. CR+RF	cell marker	CD206	ordinary one-way ANOVA with Tukey's multiple comparisons test	ns	0.0775
O vs. CR	cell marker	CD206	ordinary one-way ANOVA with Tukey's multiple comparisons test	ns	0.4593
O vs. CR+RF	cell marker	CD206	ordinary one-way ANOVA with Tukey's multiple comparisons test	ns	0.2233
CR vs. CR+RF	cell marker	CD206	ordinary one-way ANOVA with Tukey's multiple comparisons test	ns	0.941
Y vs. O	cell marker	CD66	ordinary one-way ANOVA with Tukey's multiple comparisons test	ns	0.9993
Y vs. CR	cell marker	CD66	ordinary one-way ANOVA with Tukey's multiple comparisons test	ns	0.6594
Y vs. CR+RF	cell marker	CD66	ordinary one-way ANOVA with Tukey's multiple comparisons test	ns	0.4106
O vs. CR	cell marker	CD66	ordinary one-way ANOVA with Tukey's multiple comparisons test	ns	0.6596
O vs. CR+RF	cell marker	CD66	ordinary one-way ANOVA with Tukey's multiple comparisons test	ns	0.4352
CR vs. CR+RF	cell marker	CD66	ordinary one-way ANOVA with Tukey's multiple comparisons test	ns	0.9729
Y vs. O	cytokine	IL-1β	ordinary one-way ANOVA with Tukey's multiple comparisons test	ns	0.6185
Y vs. CR	cytokine	IL-1β	ordinary one-way ANOVA with Tukey's multiple comparisons test	ns	0.9306
Y vs. CR+RF	cytokine	IL-1β	ordinary one-way ANOVA with Tukey's multiple comparisons test	ns	0.8037
O vs. CR	cytokine	IL-1β	ordinary one-way ANOVA with Tukey's multiple comparisons test	ns	0.9229
O vs. CR+RF	cytokine	IL-1β	ordinary one-way ANOVA with Tukey's multiple comparisons test	ns	0.988
CR vs. CR+RF	cytokine	IL-1β	ordinary one-way ANOVA with Tukey's multiple comparisons test	ns	0.9902
Y vs. O	cytokine	IL-1ra	ordinary one-way ANOVA with Tukey's multiple comparisons test	ns	0.3284
Y vs. CR	cytokine	IL-1ra	ordinary one-way ANOVA with Tukey's multiple comparisons test	ns	0.4045
Y vs. CR+RF	cytokine	IL-1ra	ordinary one-way ANOVA with Tukey's multiple comparisons test	ns	0.9762
O vs. CR	cytokine	IL-1ra	ordinary one-way ANOVA with Tukey's multiple comparisons test	*	0.0159
O vs. CR+RF	cytokine	IL-1ra	ordinary one-way ANOVA with Tukey's multiple comparisons test	ns	0.1707
CR vs. CR+RF	cytokine	IL-1ra	ordinary one-way ANOVA with Tukey's multiple comparisons test	ns	0.6435
Y vs. O	cytokine	IL-6	ordinary one-way ANOVA with Tukey's multiple comparisons test	ns	0.1651
Y vs. CR	cytokine	IL-6	ordinary one-way ANOVA with Tukey's multiple comparisons test	ns	0.1412
Y vs. CR+RF	cytokine	IL-6	ordinary one-way ANOVA with Tukey's multiple comparisons test	ns	0.9987
O vs. CR	cytokine	IL-6	ordinary one-way ANOVA with Tukey's multiple comparisons test	ns	0.9997
O vs. CR+RF	cytokine	IL-6	ordinary one-way ANOVA with Tukey's multiple comparisons test	ns	0.2134
CR vs. CR+RF	cytokine	IL-6	ordinary one-way ANOVA with Tukey's multiple comparisons test	ns	0.184
Y vs. O	cytokine	TNF-α	ordinary one-way ANOVA with Tukey's multiple comparisons test	ns	0.3261
Y vs. CR	cytokine	TNF-α	ordinary one-way ANOVA with Tukey's multiple comparisons test	**	0.0071
Y vs. CR+RF	cytokine	TNF-α	ordinary one-way ANOVA with Tukey's multiple comparisons test	ns	0.1553
O vs. CR	cytokine	TNF-α	ordinary one-way ANOVA with Tukey's multiple comparisons test	ns	0.2395
O vs. CR+RF	cytokine	TNF-α	ordinary one-way ANOVA with Tukey's multiple comparisons test	ns	0.9671
CR vs. CR+RF	cytokine	TNF-α	ordinary one-way ANOVA with Tukey's multiple comparisons test	ns	0.4605
Y vs. O	cytokine	IL-10	ordinary one-way ANOVA with Tukey's multiple comparisons test	ns	0.9511
Y vs. CR	cytokine	IL-10	ordinary one-way ANOVA with Tukey's multiple comparisons test	ns	0.9972
Y vs. CR+RF	cytokine	IL-10	ordinary one-way ANOVA with Tukey's multiple comparisons test	ns	0.6325
O vs. CR	cytokine	IL-10	ordinary one-way ANOVA with Tukey's multiple comparisons test	ns	0.9871
O vs. CR+RF	cytokine	IL-10	ordinary one-way ANOVA with Tukey's multiple comparisons test	ns	0.3346
CR vs. CR+RF	cytokine	IL-10	ordinary one-way ANOVA with Tukey's multiple comparisons test	ns	0.514
Y vs. O	LPO	MDA	Brown-Forsythe ANOVA test with Dunnett's T3 multiple comparisons test	ns	0.9846
Y vs. CR	LPO	MDA	Brown-Forsythe ANOVA test with Dunnett's T3 multiple comparisons test	**	0.0014
Y vs. CR+RF	LPO	MDA	Brown-Forsythe ANOVA test with Dunnett's T3 multiple comparisons test	ns	0.539
O vs. CR	LPO	MDA	Brown-Forsythe ANOVA test with Dunnett's T3 multiple comparisons test	ns	0.1405
O vs. CR+RF	LPO	MDA	Brown-Forsythe ANOVA test with Dunnett's T3 multiple comparisons test	ns	0.9972
CR vs. CR+RF	LPO	MDA	Brown-Forsythe ANOVA test with Dunnett's T3 multiple comparisons test	*	0.0265
Y vs. O	WB	COX-2	ordinary one-way ANOVA with Tukey's multiple comparisons test	ns	0.9998
Y vs. CR	WB	COX-2	ordinary one-way ANOVA with Tukey's multiple comparisons test	ns	0.9571
Y vs. CR+RF	WB	COX-2	ordinary one-way ANOVA with Tukey's multiple comparisons test	ns	0.99
O vs. CR	WB	COX-2	ordinary one-way ANOVA with Tukey's multiple comparisons test	ns	0.9742
O vs. CR+RF	WB	COX-2	ordinary one-way ANOVA with Tukey's multiple comparisons test	ns	0.9797
CR vs. CR+RF	WB	COX-2	ordinary one-way ANOVA with Tukey's multiple comparisons test	ns	0.8506
Y vs. O	WB	5-LOX	Brown-Forsythe ANOVA test with Dunnett's T3 multiple comparisons test	ns	0.4441
Y vs. CR	WB	5-LOX	Brown-Forsythe ANOVA test with Dunnett's T3 multiple comparisons test	ns	0.9908
Y vs. CR+RF	WB	5-LOX	Brown-Forsythe ANOVA test with Dunnett's T3 multiple comparisons test	ns	0.926
O vs. CR	WB	5-LOX	Brown-Forsythe ANOVA test with Dunnett's T3 multiple comparisons test	ns	0.7289
O vs. CR+RF	WB	5-LOX	Brown-Forsythe ANOVA test with Dunnett's T3 multiple comparisons test	ns	0.7019
CR vs. CR+RF	WB	5-LOX	Brown-Forsythe ANOVA test with Dunnett's T3 multiple comparisons test	ns	0.9456
Y vs. O	WB	15-LOX-1	ordinary one-way ANOVA with Tukey's multiple comparisons test	ns	0.9961
Y vs. CR	WB	15-LOX-1	ordinary one-way ANOVA with Tukey's multiple comparisons test	ns	0.9018
Y vs. CR+RF	WB	15-LOX-1	ordinary one-way ANOVA with Tukey's multiple comparisons test	ns	0.9406
O vs. CR	WB	15-LOX-1	ordinary one-way ANOVA with Tukey's multiple comparisons test	ns	0.8028
O vs. CR+RF	WB	15-LOX-1	ordinary one-way ANOVA with Tukey's multiple comparisons test	ns	0.9852
CR vs. CR+RF	WB	15-LOX-1	ordinary one-way ANOVA with Tukey's multiple comparisons test	ns	0.6057
Y vs. O	proteome	COX-1	ordinary one-way ANOVA with Tukey's multiple comparisons test	ns	0.9962
Y vs. CR	proteome	COX-1	ordinary one-way ANOVA with Tukey's multiple comparisons test	ns	0.9592
Y vs. CR+RF	proteome	COX-1	ordinary one-way ANOVA with Tukey's multiple comparisons test	ns	0.725
O vs. CR	proteome	COX-1	ordinary one-way ANOVA with Tukey's multiple comparisons test	ns	0.9103
O vs. CR+RF	proteome	COX-1	ordinary one-way ANOVA with Tukey's multiple comparisons test	ns	0.662
CR vs. CR+RF	proteome	COX-1	ordinary one-way ANOVA with Tukey's multiple comparisons test	ns	0.9449
Y vs. O	proteome	iPLA2	ordinary one-way ANOVA with Tukey's multiple comparisons test	ns	0.9828
Y vs. CR	proteome	iPLA2	ordinary one-way ANOVA with Tukey's multiple comparisons test	ns	0.802
Y vs. CR+RF	proteome	iPLA2	ordinary one-way ANOVA with Tukey's multiple comparisons test	ns	0.9783
O vs. CR	proteome	iPLA2	ordinary one-way ANOVA with Tukey's multiple comparisons test	ns	0.6494
O vs. CR+RF	proteome	iPLA2	ordinary one-way ANOVA with Tukey's multiple comparisons test	ns	>0.9999
CR vs. CR+RF	proteome	iPLA2	ordinary one-way ANOVA with Tukey's multiple comparisons test	ns	0.5737
Y vs. O	proteome	LTA4H	ordinary one-way ANOVA with Tukey's multiple comparisons test	ns	0.9934
Y vs. CR	proteome	LTA4H	ordinary one-way ANOVA with Tukey's multiple comparisons test	ns	0.8583
Y vs. CR+RF	proteome	LTA4H	ordinary one-way ANOVA with Tukey's multiple comparisons test	ns	0.2742
O vs. CR	proteome	LTA4H	ordinary one-way ANOVA with Tukey's multiple comparisons test	ns	0.768
O vs. CR+RF	proteome	LTA4H	ordinary one-way ANOVA with Tukey's multiple comparisons test	ns	0.2477
CR vs. CR+RF	proteome	LTA4H	ordinary one-way ANOVA with Tukey's multiple comparisons test	ns	0.704
Y vs. O	proteome	PGIS	ordinary one-way ANOVA with Tukey's multiple comparisons test	ns	0.1485
Y vs. CR	proteome	PGIS	ordinary one-way ANOVA with Tukey's multiple comparisons test	ns	0.5932
Y vs. CR+RF	proteome	PGIS	ordinary one-way ANOVA with Tukey's multiple comparisons test	ns	>0.9999
O vs. CR	proteome	PGIS	ordinary one-way ANOVA with Tukey's multiple comparisons test	*	0.016
O vs. CR+RF	proteome	PGIS	ordinary one-way ANOVA with Tukey's multiple comparisons test	ns	0.1371
CR vs. CR+RF	proteome	PGIS	ordinary one-way ANOVA with Tukey's multiple comparisons test	ns	0.6237
Y vs. O	proteome	PGFS	ordinary one-way ANOVA with Tukey's multiple comparisons test	ns	0.9998
Y vs. CR	proteome	PGFS	ordinary one-way ANOVA with Tukey's multiple comparisons test	ns	0.9732
Y vs. CR+RF	proteome	PGFS	ordinary one-way ANOVA with Tukey's multiple comparisons test	ns	0.7372
O vs. CR	proteome	PGFS	ordinary one-way ANOVA with Tukey's multiple comparisons test	ns	0.99
O vs. CR+RF	proteome	PGFS	ordinary one-way ANOVA with Tukey's multiple comparisons test	ns	0.8354
CR vs. CR+RF	proteome	PGFS	ordinary one-way ANOVA with Tukey's multiple comparisons test	ns	0.9312
Y vs. O	proteome	cPGES	ordinary one-way ANOVA with Tukey's multiple comparisons test	ns	>0.9999
Y vs. CR	proteome	cPGES	ordinary one-way ANOVA with Tukey's multiple comparisons test	ns	0.2294
Y vs. CR+RF	proteome	cPGES	ordinary one-way ANOVA with Tukey's multiple comparisons test	ns	0.3763
O vs. CR	proteome	cPGES	ordinary one-way ANOVA with Tukey's multiple comparisons test	ns	0.306
O vs. CR+RF	proteome	cPGES	ordinary one-way ANOVA with Tukey's multiple comparisons test	ns	0.4582
CR vs. CR+RF	proteome	cPGES	ordinary one-way ANOVA with Tukey's multiple comparisons test	ns	0.9867
Y vs. O	proteome	mPGES-2	Brown-Forsythe ANOVA test with Dunnett's T3 multiple comparisons test	ns	0.9991
Y vs. CR	proteome	mPGES-2	Brown-Forsythe ANOVA test with Dunnett's T3 multiple comparisons test	ns	0.8517
Y vs. CR+RF	proteome	mPGES-2	Brown-Forsythe ANOVA test with Dunnett's T3 multiple comparisons test	ns	0.9265
O vs. CR	proteome	mPGES-2	Brown-Forsythe ANOVA test with Dunnett's T3 multiple comparisons test	ns	0.9985
O vs. CR+RF	proteome	mPGES-2	Brown-Forsythe ANOVA test with Dunnett's T3 multiple comparisons test	ns	0.9946
CR vs. CR+RF	proteome	mPGES-2	Brown-Forsythe ANOVA test with Dunnett's T3 multiple comparisons test	ns	0.9991
Y vs. O	proteome	sEH	ordinary one-way ANOVA with Tukey's multiple comparisons test	ns	0.7048
Y vs. CR	proteome	sEH	ordinary one-way ANOVA with Tukey's multiple comparisons test	ns	0.7772
Y vs. CR+RF	proteome	sEH	ordinary one-way ANOVA with Tukey's multiple comparisons test	ns	0.9493
O vs. CR	proteome	sEH	ordinary one-way ANOVA with Tukey's multiple comparisons test	ns	0.9956
O vs. CR+RF	proteome	sEH	ordinary one-way ANOVA with Tukey's multiple comparisons test	ns	0.9298
CR vs. CR+RF	proteome	sEH	ordinary one-way ANOVA with Tukey's multiple comparisons test	ns	0.9747
Y vs. O	proteome	PRG-1	ordinary one-way ANOVA with Tukey's multiple comparisons test	ns	0.496
Y vs. CR	proteome	PRG-1	ordinary one-way ANOVA with Tukey's multiple comparisons test	ns	0.5439
Y vs. CR+RF	proteome	PRG-1	ordinary one-way ANOVA with Tukey's multiple comparisons test	ns	0.9977
O vs. CR	proteome	PRG-1	ordinary one-way ANOVA with Tukey's multiple comparisons test	ns	0.9959
O vs. CR+RF	proteome	PRG-1	ordinary one-way ANOVA with Tukey's multiple comparisons test	ns	0.5931
CR vs. CR+RF	proteome	PRG-1	ordinary one-way ANOVA with Tukey's multiple comparisons test	ns	0.6537
Y vs. O	proteome	CYP1A2	ordinary one-way ANOVA with Tukey's multiple comparisons test	ns	0.1083
Y vs. CR	proteome	CYP1A2	ordinary one-way ANOVA with Tukey's multiple comparisons test	ns	0.1003
Y vs. CR+RF	proteome	CYP1A2	ordinary one-way ANOVA with Tukey's multiple comparisons test	ns	0.1642
O vs. CR	proteome	CYP1A2	ordinary one-way ANOVA with Tukey's multiple comparisons test	ns	0.9962
O vs. CR+RF	proteome	CYP1A2	ordinary one-way ANOVA with Tukey's multiple comparisons test	ns	0.9657
CR vs. CR+RF	proteome	CYP1A2	ordinary one-way ANOVA with Tukey's multiple comparisons test	ns	0.9924
Y vs. O	proteome	CYP2C29	ordinary one-way ANOVA with Tukey's multiple comparisons test	*	0.026
Y vs. CR	proteome	CYP2C29	ordinary one-way ANOVA with Tukey's multiple comparisons test	**	0.0081
Y vs. CR+RF	proteome	CYP2C29	ordinary one-way ANOVA with Tukey's multiple comparisons test	ns	0.2608
O vs. CR	proteome	CYP2C29	ordinary one-way ANOVA with Tukey's multiple comparisons test	ns	0.9985
O vs. CR+RF	proteome	CYP2C29	ordinary one-way ANOVA with Tukey's multiple comparisons test	ns	0.4891
CR vs. CR+RF	proteome	CYP2C29	ordinary one-way ANOVA with Tukey's multiple comparisons test	ns	0.3086
Y vs. O	proteome	CYP2C50	ordinary one-way ANOVA with Tukey's multiple comparisons test	**	0.0039
Y vs. CR	proteome	CYP2C50	ordinary one-way ANOVA with Tukey's multiple comparisons test	ns	0.1115
Y vs. CR+RF	proteome	CYP2C50	ordinary one-way ANOVA with Tukey's multiple comparisons test	*	0.0381
O vs. CR	proteome	CYP2C50	ordinary one-way ANOVA with Tukey's multiple comparisons test	ns	0.2705
O vs. CR+RF	proteome	CYP2C50	ordinary one-way ANOVA with Tukey's multiple comparisons test	ns	0.5241
CR vs. CR+RF	proteome	CYP2C50	ordinary one-way ANOVA with Tukey's multiple comparisons test	ns	0.9441
Y vs. O	proteome	CYP2C54	ordinary one-way ANOVA with Tukey's multiple comparisons test	****	<0.0001
Y vs. CR	proteome	CYP2C54	ordinary one-way ANOVA with Tukey's multiple comparisons test	ns	0.6988
Y vs. CR+RF	proteome	CYP2C54	ordinary one-way ANOVA with Tukey's multiple comparisons test	ns	0.0535
O vs. CR	proteome	CYP2C54	ordinary one-way ANOVA with Tukey's multiple comparisons test	***	0.0003
O vs. CR+RF	proteome	CYP2C54	ordinary one-way ANOVA with Tukey's multiple comparisons test	**	0.0066
CR vs. CR+RF	proteome	CYP2C54	ordinary one-way ANOVA with Tukey's multiple comparisons test	ns	0.352
Y vs. O	LM	PGD2	ordinary one-way ANOVA with Tukey's multiple comparisons test	ns	0.9959
Y vs. CR	LM	PGD2	ordinary one-way ANOVA with Tukey's multiple comparisons test	ns	>0.9999
Y vs. CR+RF	LM	PGD2	ordinary one-way ANOVA with Tukey's multiple comparisons test	**	0.0083
O vs. CR	LM	PGD2	ordinary one-way ANOVA with Tukey's multiple comparisons test	ns	0.9999
O vs. CR+RF	LM	PGD2	ordinary one-way ANOVA with Tukey's multiple comparisons test	*	0.0281
CR vs. CR+RF	LM	PGD2	ordinary one-way ANOVA with Tukey's multiple comparisons test	*	0.0149
Y vs. O	LM	PGE1	ordinary one-way ANOVA with Tukey's multiple comparisons test	ns	0.7133
Y vs. CR	LM	PGE1	ordinary one-way ANOVA with Tukey's multiple comparisons test	*	0.0192
Y vs. CR+RF	LM	PGE1	ordinary one-way ANOVA with Tukey's multiple comparisons test	**	0.0032
O vs. CR	LM	PGE1	ordinary one-way ANOVA with Tukey's multiple comparisons test	ns	0.3167
O vs. CR+RF	LM	PGE1	ordinary one-way ANOVA with Tukey's multiple comparisons test	ns	0.071
CR vs. CR+RF	LM	PGE1	ordinary one-way ANOVA with Tukey's multiple comparisons test	ns	0.9716
Y vs. O	LM	PGE2	ordinary one-way ANOVA with Tukey's multiple comparisons test	ns	0.9775
Y vs. CR	LM	PGE2	ordinary one-way ANOVA with Tukey's multiple comparisons test	ns	>0.9999
Y vs. CR+RF	LM	PGE2	ordinary one-way ANOVA with Tukey's multiple comparisons test	ns	0.0508
O vs. CR	LM	PGE2	ordinary one-way ANOVA with Tukey's multiple comparisons test	ns	0.9957
O vs. CR+RF	LM	PGE2	ordinary one-way ANOVA with Tukey's multiple comparisons test	**	0.0095
CR vs. CR+RF	LM	PGE2	ordinary one-way ANOVA with Tukey's multiple comparisons test	*	0.0324
Y vs. O	LM	PGF1α	ordinary one-way ANOVA with Tukey's multiple comparisons test	ns	0.2077
Y vs. CR	LM	PGF1α	ordinary one-way ANOVA with Tukey's multiple comparisons test	***	0.0003
Y vs. CR+RF	LM	PGF1α	ordinary one-way ANOVA with Tukey's multiple comparisons test	ns	0.1236
O vs. CR	LM	PGF1α	ordinary one-way ANOVA with Tukey's multiple comparisons test	*	0.0462
O vs. CR+RF	LM	PGF1α	ordinary one-way ANOVA with Tukey's multiple comparisons test	ns	>0.9999
CR vs. CR+RF	LM	PGF1α	ordinary one-way ANOVA with Tukey's multiple comparisons test	ns	0.0823
Y vs. O	LM	PGF2α	ordinary one-way ANOVA with Tukey's multiple comparisons test	ns	0.9996
Y vs. CR	LM	PGF2α	ordinary one-way ANOVA with Tukey's multiple comparisons test	ns	0.5237
Y vs. CR+RF	LM	PGF2α	ordinary one-way ANOVA with Tukey's multiple comparisons test	ns	0.282
O vs. CR	LM	PGF2α	ordinary one-way ANOVA with Tukey's multiple comparisons test	ns	0.5836
O vs. CR+RF	LM	PGF2α	ordinary one-way ANOVA with Tukey's multiple comparisons test	ns	0.3273
CR vs. CR+RF	LM	PGF2α	ordinary one-way ANOVA with Tukey's multiple comparisons test	ns	0.9662
Y vs. O	LM	PGF2β	ordinary one-way ANOVA with Tukey's multiple comparisons test	ns	0.9993
Y vs. CR	LM	PGF2β	ordinary one-way ANOVA with Tukey's multiple comparisons test	ns	0.9851
Y vs. CR+RF	LM	PGF2β	ordinary one-way ANOVA with Tukey's multiple comparisons test	**	0.0038
O vs. CR	LM	PGF2β	ordinary one-way ANOVA with Tukey's multiple comparisons test	ns	0.9999
O vs. CR+RF	LM	PGF2β	ordinary one-way ANOVA with Tukey's multiple comparisons test	**	0.0096
CR vs. CR+RF	LM	PGF2β	ordinary one-way ANOVA with Tukey's multiple comparisons test	*	0.0186
Y vs. O	LM	PGF3α	ordinary one-way ANOVA with Tukey's multiple comparisons test	ns	0.9861
Y vs. CR	LM	PGF3α	ordinary one-way ANOVA with Tukey's multiple comparisons test	ns	0.8929
Y vs. CR+RF	LM	PGF3α	ordinary one-way ANOVA with Tukey's multiple comparisons test	ns	0.2152
O vs. CR	LM	PGF3α	ordinary one-way ANOVA with Tukey's multiple comparisons test	ns	0.9825
O vs. CR+RF	LM	PGF3α	ordinary one-way ANOVA with Tukey's multiple comparisons test	ns	0.1186
CR vs. CR+RF	LM	PGF3α	ordinary one-way ANOVA with Tukey's multiple comparisons test	ns	0.0582
Y vs. O	LM	PGJ2	Brown-Forsythe ANOVA test with Dunnett's T3 multiple comparisons test	ns	>0.9999
Y vs. CR	LM	PGJ2	Brown-Forsythe ANOVA test with Dunnett's T3 multiple comparisons test	ns	0.9998
Y vs. CR+RF	LM	PGJ2	Brown-Forsythe ANOVA test with Dunnett's T3 multiple comparisons test	*	0.0246
O vs. CR	LM	PGJ2	Brown-Forsythe ANOVA test with Dunnett's T3 multiple comparisons test	ns	0.9985
O vs. CR+RF	LM	PGJ2	Brown-Forsythe ANOVA test with Dunnett's T3 multiple comparisons test	ns	0.2996
CR vs. CR+RF	LM	PGJ2	Brown-Forsythe ANOVA test with Dunnett's T3 multiple comparisons test	ns	0.0736
Y vs. O	LM	15d-PGJ2	ordinary one-way ANOVA with Tukey's multiple comparisons test	ns	0.4737
Y vs. CR	LM	15d-PGJ2	ordinary one-way ANOVA with Tukey's multiple comparisons test	*	0.0401
Y vs. CR+RF	LM	15d-PGJ2	ordinary one-way ANOVA with Tukey's multiple comparisons test	*	0.0118
O vs. CR	LM	15d-PGJ2	ordinary one-way ANOVA with Tukey's multiple comparisons test	ns	0.492
O vs. CR+RF	LM	15d-PGJ2	ordinary one-way ANOVA with Tukey's multiple comparisons test	ns	0.2187
CR vs. CR+RF	LM	15d-PGJ2	ordinary one-way ANOVA with Tukey's multiple comparisons test	ns	0.94
Y vs. O	LM	6-keto-PGF1α	ordinary one-way ANOVA with Tukey's multiple comparisons test	ns	0.9289
Y vs. CR	LM	6-keto-PGF1α	ordinary one-way ANOVA with Tukey's multiple comparisons test	ns	0.7247
Y vs. CR+RF	LM	6-keto-PGF1α	ordinary one-way ANOVA with Tukey's multiple comparisons test	ns	0.1372
O vs. CR	LM	6-keto-PGF1α	ordinary one-way ANOVA with Tukey's multiple comparisons test	ns	0.3735
O vs. CR+RF	LM	6-keto-PGF1α	ordinary one-way ANOVA with Tukey's multiple comparisons test	*	0.042
CR vs. CR+RF	LM	6-keto-PGF1α	ordinary one-way ANOVA with Tukey's multiple comparisons test	ns	0.6154
Y vs. O	LM	TXB2	ordinary one-way ANOVA with Tukey's multiple comparisons test	ns	0.9982
Y vs. CR	LM	TXB2	ordinary one-way ANOVA with Tukey's multiple comparisons test	ns	0.6239
Y vs. CR+RF	LM	TXB2	ordinary one-way ANOVA with Tukey's multiple comparisons test	*	0.0126
O vs. CR	LM	TXB2	ordinary one-way ANOVA with Tukey's multiple comparisons test	ns	0.7248
O vs. CR+RF	LM	TXB2	ordinary one-way ANOVA with Tukey's multiple comparisons test	*	0.0183
CR vs. CR+RF	LM	TXB2	ordinary one-way ANOVA with Tukey's multiple comparisons test	ns	0.1496
Y vs. O	LM	trans-LTB4	ordinary one-way ANOVA with Tukey's multiple comparisons test	ns	0.65
Y vs. CR	LM	trans-LTB4	ordinary one-way ANOVA with Tukey's multiple comparisons test	ns	0.9312
Y vs. CR+RF	LM	trans-LTB4	ordinary one-way ANOVA with Tukey's multiple comparisons test	*	0.0288
O vs. CR	LM	trans-LTB4	ordinary one-way ANOVA with Tukey's multiple comparisons test	ns	0.9387
O vs. CR+RF	LM	trans-LTB4	ordinary one-way ANOVA with Tukey's multiple comparisons test	ns	0.2634
CR vs. CR+RF	LM	trans-LTB4	ordinary one-way ANOVA with Tukey's multiple comparisons test	ns	0.0968
Y vs. O	LM	epitrans-LTB4	ordinary one-way ANOVA with Tukey's multiple comparisons test	ns	0.6243
Y vs. CR	LM	epitrans-LTB4	ordinary one-way ANOVA with Tukey's multiple comparisons test	ns	0.924
Y vs. CR+RF	LM	epitrans-LTB4	ordinary one-way ANOVA with Tukey's multiple comparisons test	ns	0.0762
O vs. CR	LM	epitrans-LTB4	ordinary one-way ANOVA with Tukey's multiple comparisons test	ns	0.9326
O vs. CR+RF	LM	epitrans-LTB4	ordinary one-way ANOVA with Tukey's multiple comparisons test	ns	0.5298
CR vs. CR+RF	LM	epitrans-LTB4	ordinary one-way ANOVA with Tukey's multiple comparisons test	ns	0.2332
Y vs. O	LM	LTB4	ordinary one-way ANOVA with Tukey's multiple comparisons test	ns	0.5346
Y vs. CR	LM	LTB4	ordinary one-way ANOVA with Tukey's multiple comparisons test	ns	0.6182
Y vs. CR+RF	LM	LTB4	ordinary one-way ANOVA with Tukey's multiple comparisons test	*	0.0257
O vs. CR	LM	LTB4	ordinary one-way ANOVA with Tukey's multiple comparisons test	ns	0.999
O vs. CR+RF	LM	LTB4	ordinary one-way ANOVA with Tukey's multiple comparisons test	ns	0.325
CR vs. CR+RF	LM	LTB4	ordinary one-way ANOVA with Tukey's multiple comparisons test	ns	0.2636
Y vs. O	LM	5-HETE	ordinary one-way ANOVA with Tukey's multiple comparisons test	ns	0.2384
Y vs. CR	LM	5-HETE	ordinary one-way ANOVA with Tukey's multiple comparisons test	ns	0.9649
Y vs. CR+RF	LM	5-HETE	ordinary one-way ANOVA with Tukey's multiple comparisons test	**	0.0033
O vs. CR	LM	5-HETE	ordinary one-way ANOVA with Tukey's multiple comparisons test	ns	0.451
O vs. CR+RF	LM	5-HETE	ordinary one-way ANOVA with Tukey's multiple comparisons test	ns	0.2522
CR vs. CR+RF	LM	5-HETE	ordinary one-way ANOVA with Tukey's multiple comparisons test	**	0.0094
Y vs. O	LM	LXB5	Brown-Forsythe ANOVA test with Dunnett's T3 multiple comparisons test	ns	0.9848
Y vs. CR	LM	LXB5	Brown-Forsythe ANOVA test with Dunnett's T3 multiple comparisons test	ns	0.9972
Y vs. CR+RF	LM	LXB5	Brown-Forsythe ANOVA test with Dunnett's T3 multiple comparisons test	ns	0.1885
O vs. CR	LM	LXB5	Brown-Forsythe ANOVA test with Dunnett's T3 multiple comparisons test	ns	0.9996
O vs. CR+RF	LM	LXB5	Brown-Forsythe ANOVA test with Dunnett's T3 multiple comparisons test	ns	0.9657
CR vs. CR+RF	LM	LXB5	Brown-Forsythe ANOVA test with Dunnett's T3 multiple comparisons test	ns	0.4793
Y vs. O	LM	PDX	ordinary one-way ANOVA with Tukey's multiple comparisons test	ns	0.8925
Y vs. CR	LM	PDX	ordinary one-way ANOVA with Tukey's multiple comparisons test	ns	0.9921
Y vs. CR+RF	LM	PDX	ordinary one-way ANOVA with Tukey's multiple comparisons test	ns	0.1051
O vs. CR	LM	PDX	ordinary one-way ANOVA with Tukey's multiple comparisons test	ns	0.9728
O vs. CR+RF	LM	PDX	ordinary one-way ANOVA with Tukey's multiple comparisons test	ns	0.3435
CR vs. CR+RF	LM	PDX	ordinary one-way ANOVA with Tukey's multiple comparisons test	ns	0.1743
Y vs. O	LM	MaR2	ordinary one-way ANOVA with Tukey's multiple comparisons test	ns	0.9995
Y vs. CR	LM	MaR2	ordinary one-way ANOVA with Tukey's multiple comparisons test	ns	0.9956
Y vs. CR+RF	LM	MaR2	ordinary one-way ANOVA with Tukey's multiple comparisons test	*	0.0499
O vs. CR	LM	MaR2	ordinary one-way ANOVA with Tukey's multiple comparisons test	ns	0.986
O vs. CR+RF	LM	MaR2	ordinary one-way ANOVA with Tukey's multiple comparisons test	ns	0.0624
CR vs. CR+RF	LM	MaR2	ordinary one-way ANOVA with Tukey's multiple comparisons test	*	0.0309
Y vs. O	LM	RvD5	ordinary one-way ANOVA with Tukey's multiple comparisons test	ns	0.9429
Y vs. CR	LM	RvD5	ordinary one-way ANOVA with Tukey's multiple comparisons test	ns	0.9941
Y vs. CR+RF	LM	RvD5	ordinary one-way ANOVA with Tukey's multiple comparisons test	ns	0.1415
O vs. CR	LM	RvD5	ordinary one-way ANOVA with Tukey's multiple comparisons test	ns	0.9897
O vs. CR+RF	LM	RvD5	ordinary one-way ANOVA with Tukey's multiple comparisons test	ns	0.3496
CR vs. CR+RF	LM	RvD5	ordinary one-way ANOVA with Tukey's multiple comparisons test	ns	0.2189
Y vs. O	LM	4-HDHA	ordinary one-way ANOVA with Tukey's multiple comparisons test	ns	0.2077
Y vs. CR	LM	4-HDHA	ordinary one-way ANOVA with Tukey's multiple comparisons test	ns	0.9682
Y vs. CR+RF	LM	4-HDHA	ordinary one-way ANOVA with Tukey's multiple comparisons test	****	<0.0001
O vs. CR	LM	4-HDHA	ordinary one-way ANOVA with Tukey's multiple comparisons test	ns	0.3964
O vs. CR+RF	LM	4-HDHA	ordinary one-way ANOVA with Tukey's multiple comparisons test	*	0.0158
CR vs. CR+RF	LM	4-HDHA	ordinary one-way ANOVA with Tukey's multiple comparisons test	***	0.0003
Y vs. O	LM	7-HDHA	ordinary one-way ANOVA with Tukey's multiple comparisons test	ns	0.3995
Y vs. CR	LM	7-HDHA	ordinary one-way ANOVA with Tukey's multiple comparisons test	ns	0.7042
Y vs. CR+RF	LM	7-HDHA	ordinary one-way ANOVA with Tukey's multiple comparisons test	**	0.0022
O vs. CR	LM	7-HDHA	ordinary one-way ANOVA with Tukey's multiple comparisons test	ns	0.9389
O vs. CR+RF	LM	7-HDHA	ordinary one-way ANOVA with Tukey's multiple comparisons test	ns	0.0994
CR vs. CR+RF	LM	7-HDHA	ordinary one-way ANOVA with Tukey's multiple comparisons test	*	0.0233
Y vs. O	LM	10-HDHA	ordinary one-way ANOVA with Tukey's multiple comparisons test	ns	0.2477
Y vs. CR	LM	10-HDHA	ordinary one-way ANOVA with Tukey's multiple comparisons test	ns	0.5186
Y vs. CR+RF	LM	10-HDHA	ordinary one-way ANOVA with Tukey's multiple comparisons test	***	0.0008
O vs. CR	LM	10-HDHA	ordinary one-way ANOVA with Tukey's multiple comparisons test	ns	0.9291
O vs. CR+RF	LM	10-HDHA	ordinary one-way ANOVA with Tukey's multiple comparisons test	ns	0.0857
CR vs. CR+RF	LM	10-HDHA	ordinary one-way ANOVA with Tukey's multiple comparisons test	*	0.0182
Y vs. O	LM	13-HDHA	ordinary one-way ANOVA with Tukey's multiple comparisons test	ns	0.2499
Y vs. CR	LM	13-HDHA	ordinary one-way ANOVA with Tukey's multiple comparisons test	ns	0.4759
Y vs. CR+RF	LM	13-HDHA	ordinary one-way ANOVA with Tukey's multiple comparisons test	***	0.0006
O vs. CR	LM	13-HDHA	ordinary one-way ANOVA with Tukey's multiple comparisons test	ns	0.9508
O vs. CR+RF	LM	13-HDHA	ordinary one-way ANOVA with Tukey's multiple comparisons test	ns	0.0663
CR vs. CR+RF	LM	13-HDHA	ordinary one-way ANOVA with Tukey's multiple comparisons test	*	0.016
Y vs. O	LM	5-HEPE	ordinary one-way ANOVA with Tukey's multiple comparisons test	ns	0.7504
Y vs. CR	LM	5-HEPE	ordinary one-way ANOVA with Tukey's multiple comparisons test	ns	0.9997
Y vs. CR+RF	LM	5-HEPE	ordinary one-way ANOVA with Tukey's multiple comparisons test	ns	0.9391
O vs. CR	LM	5-HEPE	ordinary one-way ANOVA with Tukey's multiple comparisons test	ns	0.7958
O vs. CR+RF	LM	5-HEPE	ordinary one-way ANOVA with Tukey's multiple comparisons test	ns	0.9677
CR vs. CR+RF	LM	5-HEPE	ordinary one-way ANOVA with Tukey's multiple comparisons test	ns	0.9616
Y vs. O	LM	11-HEPE	ordinary one-way ANOVA with Tukey's multiple comparisons test	ns	0.715
Y vs. CR	LM	11-HEPE	ordinary one-way ANOVA with Tukey's multiple comparisons test	ns	0.9999
Y vs. CR+RF	LM	11-HEPE	ordinary one-way ANOVA with Tukey's multiple comparisons test	ns	0.3058
O vs. CR	LM	11-HEPE	ordinary one-way ANOVA with Tukey's multiple comparisons test	ns	0.6767
O vs. CR+RF	LM	11-HEPE	ordinary one-way ANOVA with Tukey's multiple comparisons test	ns	0.9147
CR vs. CR+RF	LM	11-HEPE	ordinary one-way ANOVA with Tukey's multiple comparisons test	ns	0.2758
Y vs. O	LM	18-HEPE	ordinary one-way ANOVA with Tukey's multiple comparisons test	ns	0.746
Y vs. CR	LM	18-HEPE	ordinary one-way ANOVA with Tukey's multiple comparisons test	ns	0.9487
Y vs. CR+RF	LM	18-HEPE	ordinary one-way ANOVA with Tukey's multiple comparisons test	ns	0.4001
O vs. CR	LM	18-HEPE	ordinary one-way ANOVA with Tukey's multiple comparisons test	ns	0.4446
O vs. CR+RF	LM	18-HEPE	ordinary one-way ANOVA with Tukey's multiple comparisons test	ns	0.9532
CR vs. CR+RF	LM	18-HEPE	ordinary one-way ANOVA with Tukey's multiple comparisons test	ns	0.176
Y vs. O	LM	8-HETE	ordinary one-way ANOVA with Tukey's multiple comparisons test	ns	0.2199
Y vs. CR	LM	8-HETE	ordinary one-way ANOVA with Tukey's multiple comparisons test	ns	0.9228
Y vs. CR+RF	LM	8-HETE	ordinary one-way ANOVA with Tukey's multiple comparisons test	**	0.0014
O vs. CR	LM	8-HETE	ordinary one-way ANOVA with Tukey's multiple comparisons test	ns	0.5072
O vs. CR+RF	LM	8-HETE	ordinary one-way ANOVA with Tukey's multiple comparisons test	ns	0.1463
CR vs. CR+RF	LM	8-HETE	ordinary one-way ANOVA with Tukey's multiple comparisons test	**	0.0056
Y vs. O	LM	11-HETE	ordinary one-way ANOVA with Tukey's multiple comparisons test	ns	0.2289
Y vs. CR	LM	11-HETE	ordinary one-way ANOVA with Tukey's multiple comparisons test	ns	0.5547
Y vs. CR+RF	LM	11-HETE	ordinary one-way ANOVA with Tukey's multiple comparisons test	***	0.0004
O vs. CR	LM	11-HETE	ordinary one-way ANOVA with Tukey's multiple comparisons test	ns	0.8907
O vs. CR+RF	LM	11-HETE	ordinary one-way ANOVA with Tukey's multiple comparisons test	*	0.049
CR vs. CR+RF	LM	11-HETE	ordinary one-way ANOVA with Tukey's multiple comparisons test	**	0.0075
Y vs. O	LM	9-HODE	ordinary one-way ANOVA with Tukey's multiple comparisons test	ns	0.9104
Y vs. CR	LM	9-HODE	ordinary one-way ANOVA with Tukey's multiple comparisons test	ns	0.9624
Y vs. CR+RF	LM	9-HODE	ordinary one-way ANOVA with Tukey's multiple comparisons test	**	0.0021
O vs. CR	LM	9-HODE	ordinary one-way ANOVA with Tukey's multiple comparisons test	ns	0.9979
O vs. CR+RF	LM	9-HODE	ordinary one-way ANOVA with Tukey's multiple comparisons test	**	0.0093
CR vs. CR+RF	LM	9-HODE	ordinary one-way ANOVA with Tukey's multiple comparisons test	**	0.0062
Y vs. O	LM	13-HODE	ordinary one-way ANOVA with Tukey's multiple comparisons test	ns	0.9103
Y vs. CR	LM	13-HODE	ordinary one-way ANOVA with Tukey's multiple comparisons test	ns	0.9707
Y vs. CR+RF	LM	13-HODE	ordinary one-way ANOVA with Tukey's multiple comparisons test	**	0.002
O vs. CR	LM	13-HODE	ordinary one-way ANOVA with Tukey's multiple comparisons test	ns	0.9961
O vs. CR+RF	LM	13-HODE	ordinary one-way ANOVA with Tukey's multiple comparisons test	**	0.0088
CR vs. CR+RF	LM	13-HODE	ordinary one-way ANOVA with Tukey's multiple comparisons test	**	0.0053
Y vs. O	LM	14-HDHA	ordinary one-way ANOVA with Tukey's multiple comparisons test	ns	0.112
Y vs. CR	LM	14-HDHA	ordinary one-way ANOVA with Tukey's multiple comparisons test	ns	0.4572
Y vs. CR+RF	LM	14-HDHA	ordinary one-way ANOVA with Tukey's multiple comparisons test	***	0.0003
O vs. CR	LM	14-HDHA	ordinary one-way ANOVA with Tukey's multiple comparisons test	ns	0.7702
O vs. CR+RF	LM	14-HDHA	ordinary one-way ANOVA with Tukey's multiple comparisons test	ns	0.0807
CR vs. CR+RF	LM	14-HDHA	ordinary one-way ANOVA with Tukey's multiple comparisons test	**	0.0075
Y vs. O	LM	17-HDHA	ordinary one-way ANOVA with Tukey's multiple comparisons test	ns	0.3368
Y vs. CR	LM	17-HDHA	ordinary one-way ANOVA with Tukey's multiple comparisons test	ns	0.7279
Y vs. CR+RF	LM	17-HDHA	ordinary one-way ANOVA with Tukey's multiple comparisons test	***	0.0007
O vs. CR	LM	17-HDHA	ordinary one-way ANOVA with Tukey's multiple comparisons test	ns	0.8812
O vs. CR+RF	LM	17-HDHA	ordinary one-way ANOVA with Tukey's multiple comparisons test	ns	0.0511
CR vs. CR+RF	LM	17-HDHA	ordinary one-way ANOVA with Tukey's multiple comparisons test	**	0.0074
Y vs. O	LM	12-HEPE	ordinary one-way ANOVA with Tukey's multiple comparisons test	ns	0.9755
Y vs. CR	LM	12-HEPE	ordinary one-way ANOVA with Tukey's multiple comparisons test	ns	0.6455
Y vs. CR+RF	LM	12-HEPE	ordinary one-way ANOVA with Tukey's multiple comparisons test	ns	0.7249
O vs. CR	LM	12-HEPE	ordinary one-way ANOVA with Tukey's multiple comparisons test	ns	0.8683
O vs. CR+RF	LM	12-HEPE	ordinary one-way ANOVA with Tukey's multiple comparisons test	ns	0.4788
CR vs. CR+RF	LM	12-HEPE	ordinary one-way ANOVA with Tukey's multiple comparisons test	ns	0.1501
Y vs. O	LM	15-HEPE	ordinary one-way ANOVA with Tukey's multiple comparisons test	ns	0.7065
Y vs. CR	LM	15-HEPE	ordinary one-way ANOVA with Tukey's multiple comparisons test	ns	0.9811
Y vs. CR+RF	LM	15-HEPE	ordinary one-way ANOVA with Tukey's multiple comparisons test	ns	0.3948
O vs. CR	LM	15-HEPE	ordinary one-way ANOVA with Tukey's multiple comparisons test	ns	0.4921
O vs. CR+RF	LM	15-HEPE	ordinary one-way ANOVA with Tukey's multiple comparisons test	ns	0.9667
CR vs. CR+RF	LM	15-HEPE	ordinary one-way ANOVA with Tukey's multiple comparisons test	ns	0.2258
Y vs. O	LM	12-HETE	ordinary one-way ANOVA with Tukey's multiple comparisons test	ns	0.9026
Y vs. CR	LM	12-HETE	ordinary one-way ANOVA with Tukey's multiple comparisons test	ns	0.9954
Y vs. CR+RF	LM	12-HETE	ordinary one-way ANOVA with Tukey's multiple comparisons test	*	0.0122
O vs. CR	LM	12-HETE	ordinary one-way ANOVA with Tukey's multiple comparisons test	ns	0.9667
O vs. CR+RF	LM	12-HETE	ordinary one-way ANOVA with Tukey's multiple comparisons test	ns	0.0706
CR vs. CR+RF	LM	12-HETE	ordinary one-way ANOVA with Tukey's multiple comparisons test	*	0.0201
Y vs. O	LM	15-HETE	ordinary one-way ANOVA with Tukey's multiple comparisons test	ns	0.1112
Y vs. CR	LM	15-HETE	ordinary one-way ANOVA with Tukey's multiple comparisons test	ns	0.5029
Y vs. CR+RF	LM	15-HETE	ordinary one-way ANOVA with Tukey's multiple comparisons test	***	0.0005
O vs. CR	LM	15-HETE	ordinary one-way ANOVA with Tukey's multiple comparisons test	ns	0.7255
O vs. CR+RF	LM	15-HETE	ordinary one-way ANOVA with Tukey's multiple comparisons test	ns	0.1236
CR vs. CR+RF	LM	15-HETE	ordinary one-way ANOVA with Tukey's multiple comparisons test	*	0.0105
Y vs. O	LM	5,12-S-diHETE	ordinary one-way ANOVA with Tukey's multiple comparisons test	ns	0.8201
Y vs. CR	LM	5,12-S-diHETE	ordinary one-way ANOVA with Tukey's multiple comparisons test	ns	0.9997
Y vs. CR+RF	LM	5,12-S-diHETE	ordinary one-way ANOVA with Tukey's multiple comparisons test	ns	0.1123
O vs. CR	LM	5,12-S-diHETE	ordinary one-way ANOVA with Tukey's multiple comparisons test	ns	0.8653
O vs. CR+RF	LM	5,12-S-diHETE	ordinary one-way ANOVA with Tukey's multiple comparisons test	ns	0.4469
CR vs. CR+RF	LM	5,12-S-diHETE	ordinary one-way ANOVA with Tukey's multiple comparisons test	ns	0.134
Y vs. O	LM	5S,6R-diHETE	ordinary one-way ANOVA with Tukey's multiple comparisons test	ns	0.7
Y vs. CR	LM	5S,6R-diHETE	ordinary one-way ANOVA with Tukey's multiple comparisons test	ns	0.893
Y vs. CR+RF	LM	5S,6R-diHETE	ordinary one-way ANOVA with Tukey's multiple comparisons test	ns	0.0506
O vs. CR	LM	5S,6R-diHETE	ordinary one-way ANOVA with Tukey's multiple comparisons test	ns	0.3204
O vs. CR+RF	LM	5S,6R-diHETE	ordinary one-way ANOVA with Tukey's multiple comparisons test	ns	0.4095
CR vs. CR+RF	LM	5S,6R-diHETE	ordinary one-way ANOVA with Tukey's multiple comparisons test	*	0.0114
Y vs. O	LM	5,15-diHETE	ordinary one-way ANOVA with Tukey's multiple comparisons test	ns	0.9135
Y vs. CR	LM	5,15-diHETE	ordinary one-way ANOVA with Tukey's multiple comparisons test	ns	0.9998
Y vs. CR+RF	LM	5,15-diHETE	ordinary one-way ANOVA with Tukey's multiple comparisons test	ns	0.1657
O vs. CR	LM	5,15-diHETE	ordinary one-way ANOVA with Tukey's multiple comparisons test	ns	0.8834
O vs. CR+RF	LM	5,15-diHETE	ordinary one-way ANOVA with Tukey's multiple comparisons test	ns	0.4456
CR vs. CR+RF	LM	5,15-diHETE	ordinary one-way ANOVA with Tukey's multiple comparisons test	ns	0.1441
Y vs. O	LM	AA	ordinary one-way ANOVA with Tukey's multiple comparisons test	ns	0.6584
Y vs. CR	LM	AA	ordinary one-way ANOVA with Tukey's multiple comparisons test	ns	0.2826
Y vs. CR+RF	LM	AA	ordinary one-way ANOVA with Tukey's multiple comparisons test	ns	0.6107
O vs. CR	LM	AA	ordinary one-way ANOVA with Tukey's multiple comparisons test	ns	0.9013
O vs. CR+RF	LM	AA	ordinary one-way ANOVA with Tukey's multiple comparisons test	ns	0.9998
CR vs. CR+RF	LM	AA	ordinary one-way ANOVA with Tukey's multiple comparisons test	ns	0.9288
Y vs. O	LM	EPA	ordinary one-way ANOVA with Tukey's multiple comparisons test	ns	0.8958
Y vs. CR	LM	EPA	ordinary one-way ANOVA with Tukey's multiple comparisons test	ns	0.6784
Y vs. CR+RF	LM	EPA	ordinary one-way ANOVA with Tukey's multiple comparisons test	ns	0.9961
O vs. CR	LM	EPA	ordinary one-way ANOVA with Tukey's multiple comparisons test	ns	0.9734
O vs. CR+RF	LM	EPA	ordinary one-way ANOVA with Tukey's multiple comparisons test	ns	0.9628
CR vs. CR+RF	LM	EPA	ordinary one-way ANOVA with Tukey's multiple comparisons test	ns	0.8024
Y vs. O	LM	DHA	ordinary one-way ANOVA with Tukey's multiple comparisons test	ns	0.6546
Y vs. CR	LM	DHA	ordinary one-way ANOVA with Tukey's multiple comparisons test	ns	0.2038
Y vs. CR+RF	LM	DHA	ordinary one-way ANOVA with Tukey's multiple comparisons test	ns	0.1756
O vs. CR	LM	DHA	ordinary one-way ANOVA with Tukey's multiple comparisons test	ns	0.8109
O vs. CR+RF	LM	DHA	ordinary one-way ANOVA with Tukey's multiple comparisons test	ns	0.7337
CR vs. CR+RF	LM	DHA	ordinary one-way ANOVA with Tukey's multiple comparisons test	ns	0.9977
Y vs. O	LM	DPA	ordinary one-way ANOVA with Tukey's multiple comparisons test	ns	0.7662
Y vs. O	metabolome	AA-derived	ordinary one-way ANOVA with Tukey's multiple comparisons test	ns	0.9931
Y vs. CR	metabolome	AA-derived	ordinary one-way ANOVA with Tukey's multiple comparisons test	ns	0.8567
Y vs. CR+RF	metabolome	AA-derived	ordinary one-way ANOVA with Tukey's multiple comparisons test	ns	0.0629
O vs. CR	metabolome	AA-derived	ordinary one-way ANOVA with Tukey's multiple comparisons test	ns	0.9516
O vs. CR+RF	metabolome	AA-derived	ordinary one-way ANOVA with Tukey's multiple comparisons test	ns	0.1056
CR vs. CR+RF	metabolome	AA-derived	ordinary one-way ANOVA with Tukey's multiple comparisons test	ns	0.2627
Y vs. O	metabolome	ALA-derived	Brown-Forsythe ANOVA test with Dunnett's T3 multiple comparisons test	ns	>0.9999
Y vs. CR	metabolome	ALA-derived	Brown-Forsythe ANOVA test with Dunnett's T3 multiple comparisons test	ns	0.9811
Y vs. CR+RF	metabolome	ALA-derived	Brown-Forsythe ANOVA test with Dunnett's T3 multiple comparisons test	*	0.0272
O vs. CR	metabolome	ALA-derived	Brown-Forsythe ANOVA test with Dunnett's T3 multiple comparisons test	ns	0.9985
O vs. CR+RF	metabolome	ALA-derived	Brown-Forsythe ANOVA test with Dunnett's T3 multiple comparisons test	ns	0.3271
CR vs. CR+RF	metabolome	ALA-derived	Brown-Forsythe ANOVA test with Dunnett's T3 multiple comparisons test	*	0.0212
Y vs. O	metabolome	EPA-derived	ordinary one-way ANOVA with Tukey's multiple comparisons test	ns	0.9538
Y vs. CR	metabolome	EPA-derived	ordinary one-way ANOVA with Tukey's multiple comparisons test	ns	0.9999
Y vs. CR+RF	metabolome	EPA-derived	ordinary one-way ANOVA with Tukey's multiple comparisons test	ns	0.7523
O vs. CR	metabolome	EPA-derived	ordinary one-way ANOVA with Tukey's multiple comparisons test	ns	0.9689
O vs. CR+RF	metabolome	EPA-derived	ordinary one-way ANOVA with Tukey's multiple comparisons test	ns	0.4472
CR vs. CR+RF	metabolome	EPA-derived	ordinary one-way ANOVA with Tukey's multiple comparisons test	ns	0.7135
Y vs. O	metabolome	DHA-derived	Brown-Forsythe ANOVA test with Dunnett's T3 multiple comparisons test	ns	0.3416
Y vs. CR	metabolome	DHA-derived	Brown-Forsythe ANOVA test with Dunnett's T3 multiple comparisons test	ns	0.7223
Y vs. CR+RF	metabolome	DHA-derived	Brown-Forsythe ANOVA test with Dunnett's T3 multiple comparisons test	ns	0.0616
O vs. CR	metabolome	DHA-derived	Brown-Forsythe ANOVA test with Dunnett's T3 multiple comparisons test	ns	0.8034
O vs. CR+RF	metabolome	DHA-derived	Brown-Forsythe ANOVA test with Dunnett's T3 multiple comparisons test	ns	0.1086
CR vs. CR+RF	metabolome	DHA-derived	Brown-Forsythe ANOVA test with Dunnett's T3 multiple comparisons test	*	0.0246
Y vs. O	metabolome	DGLA-derived	ordinary one-way ANOVA with Tukey's multiple comparisons test	ns	0.2505
Y vs. CR	metabolome	DGLA-derived	ordinary one-way ANOVA with Tukey's multiple comparisons test	**	0.0032
Y vs. CR+RF	metabolome	DGLA-derived	ordinary one-way ANOVA with Tukey's multiple comparisons test	***	0.0009
O vs. CR	metabolome	DGLA-derived	ordinary one-way ANOVA with Tukey's multiple comparisons test	ns	0.1764
O vs. CR+RF	metabolome	DGLA-derived	ordinary one-way ANOVA with Tukey's multiple comparisons test	ns	0.0618
CR vs. CR+RF	metabolome	DGLA-derived	ordinary one-way ANOVA with Tukey's multiple comparisons test	ns	0.9427
Y vs. O	infl. index		ordinary one-way ANOVA with Tukey's multiple comparisons test	ns	0.6245
Y vs. CR	infl. index		ordinary one-way ANOVA with Tukey's multiple comparisons test	ns	0.9996
Y vs. CR+RF	infl. index		ordinary one-way ANOVA with Tukey's multiple comparisons test	ns	0.9625
O vs. CR	infl. index		ordinary one-way ANOVA with Tukey's multiple comparisons test	ns	0.687
O vs. CR+RF	infl. index		ordinary one-way ANOVA with Tukey's multiple comparisons test	ns	0.8819
CR vs. CR+RF	infl. index		ordinary one-way ANOVA with Tukey's multiple comparisons test	ns	0.9813
Y vs. O	body weight	day 0	ordinary one-way ANOVA with Tukey's multiple comparisons test	****	<0.0001
Y vs. CR	body weight	day 0	ordinary one-way ANOVA with Tukey's multiple comparisons test	****	<0.0001
Y vs. CR+RF	body weight	day 0	ordinary one-way ANOVA with Tukey's multiple comparisons test	****	<0.0001
O vs. CR	body weight	day 0	ordinary one-way ANOVA with Tukey's multiple comparisons test	ns	0.9838
O vs. CR+RF	body weight	day 0	ordinary one-way ANOVA with Tukey's multiple comparisons test	ns	0.9999
CR vs. CR+RF	body weight	day 0	ordinary one-way ANOVA with Tukey's multiple comparisons test	ns	0.9911
Y vs. O	body weight	day 7	ordinary one-way ANOVA with Tukey's multiple comparisons test	***	0.0003
Y vs. CR	body weight	day 7	ordinary one-way ANOVA with Tukey's multiple comparisons test	*	0.019
Y vs. CR+RF	body weight	day 7	ordinary one-way ANOVA with Tukey's multiple comparisons test	*	0.0111
O vs. CR	body weight	day 7	ordinary one-way ANOVA with Tukey's multiple comparisons test	ns	0.2121
O vs. CR+RF	body weight	day 7	ordinary one-way ANOVA with Tukey's multiple comparisons test	ns	0.3177
CR vs. CR+RF	body weight	day 7	ordinary one-way ANOVA with Tukey's multiple comparisons test	ns	0.9931
Y vs. O	body weight	day 14	ordinary one-way ANOVA with Tukey's multiple comparisons test	***	0.0002
Y vs. CR	body weight	day 14	ordinary one-way ANOVA with Tukey's multiple comparisons test	ns	0.148
Y vs. CR+RF	body weight	day 14	ordinary one-way ANOVA with Tukey's multiple comparisons test	ns	0.1092
O vs. CR	body weight	day 14	ordinary one-way ANOVA with Tukey's multiple comparisons test	*	0.0227
O vs. CR+RF	body weight	day 14	ordinary one-way ANOVA with Tukey's multiple comparisons test	*	0.0321
CR vs. CR+RF	body weight	day 14	ordinary one-way ANOVA with Tukey's multiple comparisons test	ns	0.998
Y vs. O	body weight	day 22	ordinary one-way ANOVA with Tukey's multiple comparisons test	**	0.0014
Y vs. CR	body weight	day 22	ordinary one-way ANOVA with Tukey's multiple comparisons test	ns	0.3037
Y vs. CR+RF	body weight	day 22	ordinary one-way ANOVA with Tukey's multiple comparisons test	ns	0.1509
O vs. CR	body weight	day 22	ordinary one-way ANOVA with Tukey's multiple comparisons test	ns	0.0543
O vs. CR+RF	body weight	day 22	ordinary one-way ANOVA with Tukey's multiple comparisons test	ns	0.1223
CR vs. CR+RF	body weight	day 22	ordinary one-way ANOVA with Tukey's multiple comparisons test	ns	0.9702
Y vs. O	body weight	day 28	ordinary one-way ANOVA with Tukey's multiple comparisons test	**	0.0013
Y vs. CR	body weight	day 28	ordinary one-way ANOVA with Tukey's multiple comparisons test	ns	0.7928
Y vs. CR+RF	body weight	day 28	ordinary one-way ANOVA with Tukey's multiple comparisons test	ns	0.6658
O vs. CR	body weight	day 28	ordinary one-way ANOVA with Tukey's multiple comparisons test	**	0.0084
O vs. CR+RF	body weight	day 28	ordinary one-way ANOVA with Tukey's multiple comparisons test	*	0.0132
CR vs. CR+RF	body weight	day 28	ordinary one-way ANOVA with Tukey's multiple comparisons test	ns	0.9958
Y vs. O	precursor stacks	5-LOX-derived	ordinary one-way ANOVA with Tukey's multiple comparisons test	ns	0.2531
Y vs. CR	precursor stacks	5-LOX-derived	ordinary one-way ANOVA with Tukey's multiple comparisons test	ns	0.9681
Y vs. CR+RF	precursor stacks	5-LOX-derived	ordinary one-way ANOVA with Tukey's multiple comparisons test	**	0.0074
O vs. CR	precursor stacks	5-LOX-derived	ordinary one-way ANOVA with Tukey's multiple comparisons test	ns	0.4638
O vs. CR+RF	precursor stacks	5-LOX-derived	ordinary one-way ANOVA with Tukey's multiple comparisons test	ns	0.3921
CR vs. CR+RF	precursor stacks	5-LOX-derived	ordinary one-way ANOVA with Tukey's multiple comparisons test	*	0.0198
Y vs. O	precursor stacks	12-LOX-derived	ordinary one-way ANOVA with Tukey's multiple comparisons test	ns	0.2025
Y vs. CR	precursor stacks	12-LOX-derived	ordinary one-way ANOVA with Tukey's multiple comparisons test	ns	0.9267
Y vs. CR+RF	precursor stacks	12-LOX-derived	ordinary one-way ANOVA with Tukey's multiple comparisons test	***	0.0009
O vs. CR	precursor stacks	12-LOX-derived	ordinary one-way ANOVA with Tukey's multiple comparisons test	ns	0.4717
O vs. CR+RF	precursor stacks	12-LOX-derived	ordinary one-way ANOVA with Tukey's multiple comparisons test	ns	0.1121
CR vs. CR+RF	precursor stacks	12-LOX-derived	ordinary one-way ANOVA with Tukey's multiple comparisons test	**	0.0034
Y vs. O	precursor stacks	15-LOX-derived	ordinary one-way ANOVA with Tukey's multiple comparisons test	ns	0.161
Y vs. CR	precursor stacks	15-LOX-derived	ordinary one-way ANOVA with Tukey's multiple comparisons test	ns	0.5897
Y vs. CR+RF	precursor stacks	15-LOX-derived	ordinary one-way ANOVA with Tukey's multiple comparisons test	***	0.0006
O vs. CR	precursor stacks	15-LOX-derived	ordinary one-way ANOVA with Tukey's multiple comparisons test	ns	0.7631
O vs. CR+RF	precursor stacks	15-LOX-derived	ordinary one-way ANOVA with Tukey's multiple comparisons test	ns	0.1029
CR vs. CR+RF	precursor stacks	15-LOX-derived	ordinary one-way ANOVA with Tukey's multiple comparisons test	**	0.0097
Y vs. O	bioactive stacks	PG	ordinary one-way ANOVA with Tukey's multiple comparisons test	ns	0.9978
Y vs. CR	bioactive stacks	PG	ordinary one-way ANOVA with Tukey's multiple comparisons test	ns	0.611
Y vs. CR+RF	bioactive stacks	PG	ordinary one-way ANOVA with Tukey's multiple comparisons test	*	0.014
O vs. CR	bioactive stacks	PG	ordinary one-way ANOVA with Tukey's multiple comparisons test	ns	0.5016
O vs. CR+RF	bioactive stacks	PG	ordinary one-way ANOVA with Tukey's multiple comparisons test	**	0.0094
CR vs. CR+RF	bioactive stacks	PG	ordinary one-way ANOVA with Tukey's multiple comparisons test	ns	0.1697
Y vs. O	bioactive stacks	LT	ordinary one-way ANOVA with Tukey's multiple comparisons test	ns	0.621
Y vs. CR	bioactive stacks	LT	ordinary one-way ANOVA with Tukey's multiple comparisons test	ns	0.9141
Y vs. CR+RF	bioactive stacks	LT	ordinary one-way ANOVA with Tukey's multiple comparisons test	ns	0.0501
O vs. CR	bioactive stacks	LT	ordinary one-way ANOVA with Tukey's multiple comparisons test	ns	0.9396
O vs. CR+RF	bioactive stacks	LT	ordinary one-way ANOVA with Tukey's multiple comparisons test	ns	0.4134
CR vs. CR+RF	bioactive stacks	LT	ordinary one-way ANOVA with Tukey's multiple comparisons test	ns	0.1724
Y vs. O	bioactive stacks	TX	ordinary one-way ANOVA with Tukey's multiple comparisons test	ns	0.9982
Y vs. CR	bioactive stacks	TX	ordinary one-way ANOVA with Tukey's multiple comparisons test	ns	0.6234
Y vs. CR+RF	bioactive stacks	TX	ordinary one-way ANOVA with Tukey's multiple comparisons test	*	0.0125
O vs. CR	bioactive stacks	TX	ordinary one-way ANOVA with Tukey's multiple comparisons test	ns	0.7247
O vs. CR+RF	bioactive stacks	TX	ordinary one-way ANOVA with Tukey's multiple comparisons test	*	0.0182
CR vs. CR+RF	bioactive stacks	TX	ordinary one-way ANOVA with Tukey's multiple comparisons test	ns	0.1494
Y vs. O	bioactive stacks	SPM	Brown-Forsythe ANOVA test with Dunnett's T3 multiple comparisons test	ns	0.9939
Y vs. CR	bioactive stacks	SPM	Brown-Forsythe ANOVA test with Dunnett's T3 multiple comparisons test	ns	0.9994
Y vs. CR+RF	bioactive stacks	SPM	Brown-Forsythe ANOVA test with Dunnett's T3 multiple comparisons test	ns	0.1126
O vs. CR	bioactive stacks	SPM	Brown-Forsythe ANOVA test with Dunnett's T3 multiple comparisons test	ns	0.9997
O vs. CR+RF	bioactive stacks	SPM	Brown-Forsythe ANOVA test with Dunnett's T3 multiple comparisons test	ns	0.7299
CR vs. CR+RF	bioactive stacks	SPM	Brown-Forsythe ANOVA test with Dunnett's T3 multiple comparisons test	ns	0.1465
Y vs. O	damage marker	GSTP1	ordinary one-way ANOVA with Tukey's multiple comparisons test	ns	0.9002
Y vs. CR	damage marker	GSTP1	ordinary one-way ANOVA with Tukey's multiple comparisons test	ns	0.676
Y vs. CR+RF	damage marker	GSTP1	ordinary one-way ANOVA with Tukey's multiple comparisons test	ns	0.7499
O vs. CR	damage marker	GSTP1	ordinary one-way ANOVA with Tukey's multiple comparisons test	ns	0.3525
O vs. CR+RF	damage marker	GSTP1	ordinary one-way ANOVA with Tukey's multiple comparisons test	ns	0.4112
CR vs. CR+RF	damage marker	GSTP1	ordinary one-way ANOVA with Tukey's multiple comparisons test	ns	0.9992
Y vs. O	damage marker	GPX3	Brown-Forsythe ANOVA test with Dunnett's T3 multiple comparisons test	ns	0.5897
Y vs. CR	damage marker	GPX3	Brown-Forsythe ANOVA test with Dunnett's T3 multiple comparisons test	ns	0.0995
Y vs. CR+RF	damage marker	GPX3	Brown-Forsythe ANOVA test with Dunnett's T3 multiple comparisons test	ns	0.3562
O vs. CR	damage marker	GPX3	Brown-Forsythe ANOVA test with Dunnett's T3 multiple comparisons test	*	0.0467
O vs. CR+RF	damage marker	GPX3	Brown-Forsythe ANOVA test with Dunnett's T3 multiple comparisons test	ns	0.9301
CR vs. CR+RF	damage marker	GPX3	Brown-Forsythe ANOVA test with Dunnett's T3 multiple comparisons test	*	0.0284
Y vs. O	damage marker	S100A11	ordinary one-way ANOVA with Tukey's multiple comparisons test	ns	0.9966
Y vs. CR	damage marker	S100A11	ordinary one-way ANOVA with Tukey's multiple comparisons test	ns	0.9286
Y vs. CR+RF	damage marker	S100A11	ordinary one-way ANOVA with Tukey's multiple comparisons test	ns	0.9242
O vs. CR	damage marker	S100A11	ordinary one-way ANOVA with Tukey's multiple comparisons test	ns	0.8742
O vs. CR+RF	damage marker	S100A11	ordinary one-way ANOVA with Tukey's multiple comparisons test	ns	0.9855
CR vs. CR+RF	damage marker	S100A11	ordinary one-way ANOVA with Tukey's multiple comparisons test	ns	0.6183
Y vs. O	damage marker	FKBP1A	ordinary one-way ANOVA with Tukey's multiple comparisons test	ns	0.8174
Y vs. CR	damage marker	FKBP1A	ordinary one-way ANOVA with Tukey's multiple comparisons test	ns	0.3223
Y vs. CR+RF	damage marker	FKBP1A	ordinary one-way ANOVA with Tukey's multiple comparisons test	ns	0.9956
O vs. CR	damage marker	FKBP1A	ordinary one-way ANOVA with Tukey's multiple comparisons test	ns	0.1026
O vs. CR+RF	damage marker	FKBP1A	ordinary one-way ANOVA with Tukey's multiple comparisons test	ns	0.9071
CR vs. CR+RF	damage marker	FKBP1A	ordinary one-way ANOVA with Tukey's multiple comparisons test	ns	0.2271
Y vs. O	damage marker	PDLIM1	ordinary one-way ANOVA with Tukey's multiple comparisons test	ns	0.7931
Y vs. CR	damage marker	PDLIM1	ordinary one-way ANOVA with Tukey's multiple comparisons test	ns	0.7567
Y vs. CR+RF	damage marker	PDLIM1	ordinary one-way ANOVA with Tukey's multiple comparisons test	ns	0.8161
O vs. CR	damage marker	PDLIM1	ordinary one-way ANOVA with Tukey's multiple comparisons test	ns	>0.9999
O vs. CR+RF	damage marker	PDLIM1	ordinary one-way ANOVA with Tukey's multiple comparisons test	ns	0.999
CR vs. CR+RF	damage marker	PDLIM1	ordinary one-way ANOVA with Tukey's multiple comparisons test	ns	0.9995
Y vs. O	damage marker	PLIN2	ordinary one-way ANOVA with Tukey's multiple comparisons test	ns	0.0824
Y vs. CR	damage marker	PLIN2	ordinary one-way ANOVA with Tukey's multiple comparisons test	ns	0.7387
Y vs. CR+RF	damage marker	PLIN2	ordinary one-way ANOVA with Tukey's multiple comparisons test	**	0.0032
O vs. CR	damage marker	PLIN2	ordinary one-way ANOVA with Tukey's multiple comparisons test	ns	0.375
O vs. CR+RF	damage marker	PLIN2	ordinary one-way ANOVA with Tukey's multiple comparisons test	ns	0.6754
CR vs. CR+RF	damage marker	PLIN2	ordinary one-way ANOVA with Tukey's multiple comparisons test	*	0.0278
Y vs. O	damage marker	NME2	ordinary one-way ANOVA with Tukey's multiple comparisons test	ns	0.1274
Y vs. CR	damage marker	NME2	ordinary one-way ANOVA with Tukey's multiple comparisons test	ns	0.9453
Y vs. CR+RF	damage marker	NME2	ordinary one-way ANOVA with Tukey's multiple comparisons test	ns	0.9984
O vs. CR	damage marker	NME2	ordinary one-way ANOVA with Tukey's multiple comparisons test	ns	0.2874
O vs. CR+RF	damage marker	NME2	ordinary one-way ANOVA with Tukey's multiple comparisons test	ns	0.1646
CR vs. CR+RF	damage marker	NME2	ordinary one-way ANOVA with Tukey's multiple comparisons test	ns	0.9797
Y vs. O	damage marker	FABP5	ordinary one-way ANOVA with Tukey's multiple comparisons test	ns	0.542
Y vs. CR	damage marker	FABP5	ordinary one-way ANOVA with Tukey's multiple comparisons test	ns	0.4869
Y vs. CR+RF	damage marker	FABP5	ordinary one-way ANOVA with Tukey's multiple comparisons test	ns	0.9618
O vs. CR	damage marker	FABP5	ordinary one-way ANOVA with Tukey's multiple comparisons test	ns	0.0719
O vs. CR+RF	damage marker	FABP5	ordinary one-way ANOVA with Tukey's multiple comparisons test	ns	0.3342
CR vs. CR+RF	damage marker	FABP5	ordinary one-way ANOVA with Tukey's multiple comparisons test	ns	0.805
Y vs. O	damage marker	SEC23A	ordinary one-way ANOVA with Tukey's multiple comparisons test	ns	0.9712
Y vs. CR	damage marker	SEC23A	ordinary one-way ANOVA with Tukey's multiple comparisons test	ns	0.9365
Y vs. CR+RF	damage marker	SEC23A	ordinary one-way ANOVA with Tukey's multiple comparisons test	ns	0.764
O vs. CR	damage marker	SEC23A	ordinary one-way ANOVA with Tukey's multiple comparisons test	ns	0.7748
O vs. CR+RF	damage marker	SEC23A	ordinary one-way ANOVA with Tukey's multiple comparisons test	ns	0.5678
CR vs. CR+RF	damage marker	SEC23A	ordinary one-way ANOVA with Tukey's multiple comparisons test	ns	0.9783
Y vs. O	damage marker	SPTBN1	ordinary one-way ANOVA with Tukey's multiple comparisons test	ns	0.1134
Y vs. CR	damage marker	SPTBN1	ordinary one-way ANOVA with Tukey's multiple comparisons test	ns	0.9206
Y vs. CR+RF	damage marker	SPTBN1	ordinary one-way ANOVA with Tukey's multiple comparisons test	ns	0.6701
O vs. CR	damage marker	SPTBN1	ordinary one-way ANOVA with Tukey's multiple comparisons test	ns	0.2909
O vs. CR+RF	damage marker	SPTBN1	ordinary one-way ANOVA with Tukey's multiple comparisons test	ns	0.5285
CR vs. CR+RF	damage marker	SPTBN1	ordinary one-way ANOVA with Tukey's multiple comparisons test	ns	0.9559
Y vs. O	damage marker	FBLN1	ordinary one-way ANOVA with Tukey's multiple comparisons test	ns	0.9242
Y vs. CR	damage marker	FBLN1	ordinary one-way ANOVA with Tukey's multiple comparisons test	ns	0.8049
Y vs. CR+RF	damage marker	FBLN1	ordinary one-way ANOVA with Tukey's multiple comparisons test	ns	0.9082
O vs. CR	damage marker	FBLN1	ordinary one-way ANOVA with Tukey's multiple comparisons test	ns	0.5005
O vs. CR+RF	damage marker	FBLN1	ordinary one-way ANOVA with Tukey's multiple comparisons test	ns	>0.9999
CR vs. CR+RF	damage marker	FBLN1	ordinary one-way ANOVA with Tukey's multiple comparisons test	ns	0.421
Y vs. O	damage marker	TGFBI	ordinary one-way ANOVA with Tukey's multiple comparisons test	ns	0.2363
Y vs. CR	damage marker	TGFBI	ordinary one-way ANOVA with Tukey's multiple comparisons test	**	0.0011
Y vs. CR+RF	damage marker	TGFBI	ordinary one-way ANOVA with Tukey's multiple comparisons test	ns	0.88
O vs. CR	damage marker	TGFBI	ordinary one-way ANOVA with Tukey's multiple comparisons test	ns	0.1699
O vs. CR+RF	damage marker	TGFBI	ordinary one-way ANOVA with Tukey's multiple comparisons test	ns	0.5704
CR vs. CR+RF	damage marker	TGFBI	ordinary one-way ANOVA with Tukey's multiple comparisons test	**	0.0054
Y vs. O	damage marker	IGFBP7	ordinary one-way ANOVA with Tukey's multiple comparisons test	ns	0.427
Y vs. CR	damage marker	IGFBP7	ordinary one-way ANOVA with Tukey's multiple comparisons test	ns	0.9996
Y vs. CR+RF	damage marker	IGFBP7	ordinary one-way ANOVA with Tukey's multiple comparisons test	ns	0.1233
O vs. CR	damage marker	IGFBP7	ordinary one-way ANOVA with Tukey's multiple comparisons test	ns	0.4783
O vs. CR+RF	damage marker	IGFBP7	ordinary one-way ANOVA with Tukey's multiple comparisons test	ns	0.9461
CR vs. CR+RF	damage marker	IGFBP7	ordinary one-way ANOVA with Tukey's multiple comparisons test	ns	0.148
Y vs. O	damage marker	TNC	ordinary one-way ANOVA with Tukey's multiple comparisons test	ns	0.1182
Y vs. CR	damage marker	TNC	ordinary one-way ANOVA with Tukey's multiple comparisons test	ns	0.2137
Y vs. CR+RF	damage marker	TNC	ordinary one-way ANOVA with Tukey's multiple comparisons test	ns	0.9764
O vs. CR	damage marker	TNC	ordinary one-way ANOVA with Tukey's multiple comparisons test	ns	0.943
O vs. CR+RF	damage marker	TNC	ordinary one-way ANOVA with Tukey's multiple comparisons test	ns	0.2209
CR vs. CR+RF	damage marker	TNC	ordinary one-way ANOVA with Tukey's multiple comparisons test	ns	0.3911
Y vs. O	damage marker	ANXA2	ordinary one-way ANOVA with Tukey's multiple comparisons test	ns	0.1182
Y vs. CR	damage marker	ANXA2	ordinary one-way ANOVA with Tukey's multiple comparisons test	ns	0.2137
Y vs. CR+RF	damage marker	ANXA2	ordinary one-way ANOVA with Tukey's multiple comparisons test	ns	0.9764
O vs. CR	damage marker	ANXA2	ordinary one-way ANOVA with Tukey's multiple comparisons test	ns	0.943
O vs. CR+RF	damage marker	ANXA2	ordinary one-way ANOVA with Tukey's multiple comparisons test	ns	0.2209
CR vs. CR+RF	damage marker	ANXA2	ordinary one-way ANOVA with Tukey's multiple comparisons test	ns	0.3911
